# Supplementary material for: RNA Binding Protein-Mediated Immunosuppressive Tumor Microenvironment Contributes to Poor Prognosis in High-Grade Gliomas
Source: Research Square preprint supplement (doi:10.21203/rs.3.rs-1033119/v1), 2021-11-22
Supplement: Supplementary file 1 [file b215898b3e701eccf364d152.xlsx]

## Sheet: 01.RDP-homo_sapiens
ENSG00000001497	LAS1L	81887	FLJ12525	LAS1 like, ribosome biogenesis factor	Las1
ENSG00000002834	LASP1	3927	MLN50|Lasp-1	LIM and SH3 protein 1	Non-canonical_RBP
ENSG00000003756	RBM5	10181	LUCA15|LUCA-15|H37	RNA binding motif protein 5	G-patch
ENSG00000004059	ARF5	381	-	ADP ribosylation factor 5	MMR_HSR1
ENSG00000004478	FKBP4	2288	FKBP59|FKBP52	FKBP prolyl isomerase 4	Non-canonical_RBP
ENSG00000004534	RBM6	10180	DEF-3|3G2|NY-LU-12|g16|DEF3	RNA binding motif protein 6	G-patch
ENSG00000004700	RECQL	5965	RecQ1|RecQL1	RecQ like helicase	DEAD
ENSG00000005007	UPF1	5976	HUPF1|KIAA0221|NORF1|pNORF1|smg-2|RENT1	UPF1 RNA helicase and ATPase	UPF1_Zn_bind
ENSG00000005022	SLC25A5	292	T2|2F1|T3|ANT2	solute carrier family 25 member 5	Non-canonical_RBP
ENSG00000005075	POLR2J	5439	RPB11|hRPB14|RPB11A|RPB11m|POLR2J1	RNA polymerase II subunit J	RNA_pol_L_2
ENSG00000005100	DHX33	56919	FLJ21972|DKFZp762F2011|DDX33	DEAH-box helicase 33	HA2
ENSG00000005156	LIG3	3980	LIG3alpha|LIG2	DNA ligase 3	Non-canonical_RBP
ENSG00000005189	REXO5	81691	NEF-sp	RNA exonuclease 5	RRM_1
ENSG00000005206	SPPL2B	56928	IMP4|PSL1|KIAA1532	signal peptide peptidase like 2B	Non-canonical_RBP
ENSG00000005302	MSL3	10943	MSL3L1	MSL complex subunit 3	Tudor-knot
ENSG00000005339	CREBBP	1387	RTS|CBP|KAT3A|RSTS	CREB binding protein	Non-canonical_RBP
ENSG00000005700	IBTK	25998	DKFZP564B116|BTBD26|BTKI	inhibitor of Bruton tyrosine kinase	Non-canonical_RBP
ENSG00000005810	MYCBP2	23077	PAM|KIAA0916|FLJ10106|PHR1	MYC binding protein 2	Non-canonical_RBP
ENSG00000006047	YBX2	51087	MSY2|CSDA3|Contrin	Y-box binding protein 2	CSD
ENSG00000006125	AP2B1	163	ADTB2|CLAPB1	adaptor related protein complex 2 subunit beta 1	Non-canonical_RBP
ENSG00000006625	GGCT	79017	MGC3077|CRF21|Ggc|C7orf24|GCTG	gamma-glutamylcyclotransferase	Non-canonical_RBP
ENSG00000006712	PAF1	54623	PD2|F23149_1|FLJ11123	PAF1 homolog, Paf1/RNA polymerase II complex component	Non-canonical_RBP
ENSG00000006744	ELAC2	60528	FLJ10530|HPC2	elaC ribonuclease Z 2	Lactamase_B_4
ENSG00000007080	CCDC124	115098	N	coiled-coil domain containing 124	Non-canonical_RBP
ENSG00000007376	RPUSD1	113000	RLUCL|MGC19600|C16orf40	RNA pseudouridine synthase domain containing 1	PseudoU_synth_2
ENSG00000007392	LUC7L	55692	LUC7B1|hLuc7B1|Luc7	LUC7 like	LUC7
ENSG00000007520	TSR3	115939	MGC24381|C16orf42	TSR3 ribosome maturation factor	Non-canonical_RBP
ENSG00000008294	SPAG9	9043	HSS|SYD1|KIAA0516|MGC14967|MGC74461|MGC117291|JLP|PHET|HLC4|FLJ13450|FLJ14006|FLJ26141|FLJ34602|CT89|JIP4|JIP-4|PIG6	sperm associated antigen 9	Non-canonical_RBP
ENSG00000008869	HEATR5B	54497	KIAA1414|DKFZp686P15184	HEAT repeat containing 5B	Non-canonical_RBP
ENSG00000008952	SEC62	7095	Dtrp1|HTP1|TLOC1	SEC62 homolog, preprotein translocation factor	Non-canonical_RBP
ENSG00000008988	RPS20	6224	S20|uS10	ribosomal protein S20	Ribosomal_S10
ENSG00000009307	CSDE1	7812	D1S155E|UNR	cold shock domain containing E1	CSD
ENSG00000009954	BAZ1B	9031	WSTF|WBSCR9|WBSCR10	bromodomain adjacent to zinc finger domain 1B	Non-canonical_RBP
ENSG00000010165	EEF1AKNMT	51603	CGI-01|KIAA0859|DFNB26|METTL13	eEF1A lysine and N-terminal methyltransferase	Methyltransf_31
ENSG00000010244	ZNF207	7756	BuGZ	zinc finger protein 207	Non-canonical_RBP
ENSG00000010256	UQCRC1	7384	D3S3191|QCR1|UQCR1	ubiquinol-cytochrome c reductase core protein 1	Non-canonical_RBP
ENSG00000010292	NCAPD2	9918	CNAP1|hCAP-D2|CAP-D2|KIAA0159	non-SMC condensin I complex subunit D2	Non-canonical_RBP
ENSG00000011007	ELOA	6924	SIII|TCEB3A|TCEB3	elongin A	Non-canonical_RBP
ENSG00000011243	AKAP8L	26993	NAKAP95|HAP95	A-kinase anchoring protein 8 like	AKAP95
ENSG00000011260	UTP18	51096	CGI-48|WDR50	UTP18 small subunit processome component	Non-canonical_RBP
ENSG00000011304	PTBP1	5725	HNRPI|HNRNP-I|PTB2|PTB3|PTB-1|PTB4|pPTB|PTB	polypyrimidine tract binding protein 1	RRM_5
ENSG00000011376	LARS2	23395	KIAA0028|LEURS|MGC26121|mtLeuRS	leucyl-tRNA synthetase 2, mitochondrial	tRNA-synt_1
ENSG00000011426	ANLN	54443	ANILLIN|Scraps|scra	anillin actin binding protein	Non-canonical_RBP
ENSG00000011485	PPP5C	5536	PP5|PPP5	protein phosphatase 5 catalytic subunit	Non-canonical_RBP
ENSG00000011590	ZBTB32	27033	TZFP|FAZF|FAXF|Rog|ZNF538	zinc finger and BTB domain containing 32	zf-C2H2
ENSG00000012048	BRCA1	672	RNF53|BRCC1|PPP1R53|FANCS	BRCA1 DNA repair associated	Non-canonical_RBP
ENSG00000013016	EHD3	30845	PAST3	EH domain containing 3	MMR_HSR1
ENSG00000013364	MVP	9961	LRP|VAULT1	major vault protein	Vault
ENSG00000013503	POLR3B	55703	RPC2|FLJ10388	RNA polymerase III subunit B	RNA_pol_Rpb2_6
ENSG00000013523	ANGEL1	23357	Ccr4e|KIAA0759	angel homolog 1	Exo_endo_phos
ENSG00000013563	DNASE1L1	1774	DNAS1L1|XIB|DNASEX|DNL1L	deoxyribonuclease 1 like 1	Exo_endo_phos
ENSG00000014123	UFL1	23376	NLBP|Maxer|RCAD|KIAA0776	UFM1 specific ligase 1	Non-canonical_RBP
ENSG00000014164	ZC3H3	23144	KIAA0150|ZC3HDC3	zinc finger CCCH-type containing 3	zf-CCCH
ENSG00000014216	CAPN1	823	muCANP|muCL|CANP|CANPL1	calpain 1	Non-canonical_RBP
ENSG00000014641	MDH1	4190	N	malate dehydrogenase 1	Non-canonical_RBP
ENSG00000015153	YAF2	10138	-	YY1 associated factor 2	zf-RanBP
ENSG00000015479	MATR3	9782	KIAA0723|MGC9105|VCPDM|MPD2	matrin 3	RRM_5
ENSG00000018510	AGPS	8540	ADHAPS|ADAS|ALDHPSY|ADPS|ADAP-S	alkylglycerone phosphate synthase	Non-canonical_RBP
ENSG00000018869	ZNF582	147948	FLJ30927	zinc finger protein 582	zf-C2H2
ENSG00000019549	SNAI2	6591	SLUGH1|SNAIL2|SLUGH|SLUG	snail family transcriptional repressor 2	zf-C2H2
ENSG00000019995	ZRANB1	54764	TRABID	zinc finger RANBP2-type containing 1	zf-RanBP
ENSG00000020256	ZFP64	55734	FLJ10734|dJ831D17.1|FLJ12628|dJ548G19.1|ZNF338	ZFP64 zinc finger protein	zf-C2H2
ENSG00000020922	MRE11	4361	ATLD|MRE11A	MRE11 homolog, double strand break repair nuclease	Non-canonical_RBP
ENSG00000021776	AQR	9716	KIAA0560|fSAP164|IBP160	aquarius intron-binding spliceosomal factor	ResIII
ENSG00000021826	CPS1	1373	N	carbamoyl-phosphate synthase 1	Non-canonical_RBP
ENSG00000022277	RTF2	51507	HSPC164|CDAO5|C20orf43|RTFDC1	replication termination factor 2	Non-canonical_RBP
ENSG00000023228	NDUFS1	4719	CI-75k	NADH:ubiquinone oxidoreductase core subunit S1	Non-canonical_RBP
ENSG00000023287	RB1CC1	9821	KIAA0203|Cc1|DRAGOU14|FIP200|ATG17|PPP1R131	RB1 inducible coiled-coil 1	Non-canonical_RBP
ENSG00000023318	ERP44	23071	KIAA0573|PDIA10|TXNDC4	endoplasmic reticulum protein 44	Non-canonical_RBP
ENSG00000023909	GCLM	2730	GLCLR	glutamate-cysteine ligase modifier subunit	Non-canonical_RBP
ENSG00000024422	EHD2	30846	PAST2	EH domain containing 2	MMR_HSR1
ENSG00000025772	TOMM34	10953	TOM34|HTOM34P	translocase of outer mitochondrial membrane 34	Non-canonical_RBP
ENSG00000025796	SEC63	11231	SEC63L|PRO2507|ERdj2|DNAJC23	SEC63 homolog, protein translocation regulator	Non-canonical_RBP
ENSG00000025800	KPNA6	23633	IPOA7|KPNA7|MGC17918|FLJ11249	karyopherin subunit alpha 6	Non-canonical_RBP
ENSG00000026025	VIM	7431	N	vimentin	Non-canonical_RBP
ENSG00000026297	RNASET2	8635	RNASE6PL|FLJ10907|bA514O12.3	ribonuclease T2	Ribonuclease_T2
ENSG00000029363	BCLAF1	9774	KIAA0164|BTF	BCL2 associated transcription factor 1	THRAP3_BCLAF1
ENSG00000029639	TFB1M	51106	mtTFB|CGI-75	transcription factor B1, mitochondrial	RrnaAD
ENSG00000029993	HMGB3	3149	HMG2A|MGC90319|HMG4	high mobility group box 3	Non-canonical_RBP
ENSG00000030066	NUP160	23279	KIAA0197|FLJ22583	nucleoporin 160	Non-canonical_RBP
ENSG00000031698	SARS	6301	SERS	seryl-tRNA synthetase	tRNA-synt_2b
ENSG00000031823	RANBP3	8498	N	RAN binding protein 3	Non-canonical_RBP
ENSG00000032219	ARID4A	5926	RBP1|RBP-1|RBBP1	AT-rich interaction domain 4A	Tudor-knot
ENSG00000033030	ZCCHC8	55596	DKFZp434E2220	zinc finger CCHC-type containing 8	zf-CCHC
ENSG00000033050	ABCF2	10061	EST133090|ABC28|M-ABC1|HUSSY-18	ATP binding cassette subfamily F member 2	Non-canonical_RBP
ENSG00000033178	UBA6	55236	FLJ10808|UBE1L2	ubiquitin like modifier activating enzyme 6	Non-canonical_RBP
ENSG00000035403	VCL	7414	N	vinculin	Non-canonical_RBP
ENSG00000035664	DAPK2	23604	DRP-1|MGC119312	death associated protein kinase 2	RIO1
ENSG00000035687	ADSS	159	N	adenylosuccinate synthase	Non-canonical_RBP
ENSG00000035928	RFC1	5981	A1|PO-GA|RFC140|MHCBFB	replication factor C subunit 1	Non-canonical_RBP
ENSG00000037241	RPL26L1	51121	RPL26P1	ribosomal protein L26 like 1	KOW
ENSG00000037474	NSUN2	54888	FLJ20303|TRM4|Misu|MRT5	NOP2/Sun RNA methyltransferase 2	Methyltr_RsmB-F
ENSG00000037757	MRI1	84245	MGC3207|Ypr118w|mtnA|MRDI	methylthioribose-1-phosphate isomerase 1	IF-2B
ENSG00000038219	BOD1L1	259282	FLJ33215|KIAA1327|FAM44A|BOD1L	biorientation of chromosomes in cell division 1 like 1	Non-canonical_RBP
ENSG00000038358	EDC4	23644	RCD-8|Ge-1|HEDLS	enhancer of mRNA decapping 4	Non-canonical_RBP
ENSG00000038382	TRIO	7204	ARHGEF23	trio Rho guanine nucleotide exchange factor	Non-canonical_RBP
ENSG00000039123	MTREX	23517	Mtr4|Dob1|fSAP118|KIAA0052|SKIV2L2	Mtr4 exosome RNA helicase	rRNA_proc-arch
ENSG00000039560	RAI14	26064	NORPEG|KIAA1334|RAI13|DKFZp564G013	retinoic acid induced 14	Non-canonical_RBP
ENSG00000040341	STAU2	27067	39K2	staufen double-stranded RNA binding protein 2	dsrm
ENSG00000041802	LSG1	55341	FLJ11301	large 60S subunit nuclear export GTPase 1	MMR_HSR1
ENSG00000041880	PARP3	10039	ADPRT3|IRT1|hPARP-3|pADPRT-3|ADPRTL3	poly(ADP-ribose) polymerase family member 3	PARP
ENSG00000042493	CAPG	822	MCP|AFCP	capping actin protein, gelsolin like	Non-canonical_RBP
ENSG00000043514	TRIT1	54802	FLJ20061|IPT	tRNA isopentenyltransferase 1	IPPT
ENSG00000044115	CTNNA1	1495	CAP102	catenin alpha 1	Non-canonical_RBP
ENSG00000044574	HSPA5	3309	BiP|GRP78	heat shock protein family A (Hsp70) member 5	Non-canonical_RBP
ENSG00000046604	DSG2	1829	CDHF5	desmoglein 2	Non-canonical_RBP
ENSG00000046647	GEMIN8	54960	FLJ20514|FAM51A1	gem nuclear organelle associated protein 8	GEMIN8
ENSG00000046651	OFD1	8481	71-7A|JBTS10|CXorf5|RP23	OFD1 centriole and centriolar satellite protein	Non-canonical_RBP
ENSG00000047188	YTHDC2	64848	FLJ2194|FLJ10053|DKFZp564A186	YTH domain containing 2	YTH
ENSG00000047315	POLR2B	5431	RPB2	RNA polymerase II subunit B	RNA_pol_Rpb2_6
ENSG00000047410	TPR	7175	N	translocated promoter region, nuclear basket protein	Non-canonical_RBP
ENSG00000047849	MAP4	4134	N	microtubule associated protein 4	Non-canonical_RBP
ENSG00000048162	NOP16	51491	HSPC111|HSPC185|LOC51491	NOP16 nucleolar protein	Nop16
ENSG00000048405	ZNF800	168850	-	zinc finger protein 800	zf-C2H2
ENSG00000048544	MRPS10	55173	FLJ10567	mitochondrial ribosomal protein S10	Ribosomal_S10
ENSG00000048649	RSF1	51773	XAP8|RSF-1|p325|HBXAP	remodeling and spacing factor 1	Non-canonical_RBP
ENSG00000048740	CELF2	10659	Etr-3|NAPOR-2|BRUNOL3|CUGBP2	CUGBP Elav-like family member 2	RRM_1
ENSG00000048828	FAM120A	23196	KIAA0183|OSSA|C9orf10	family with sequence similarity 120A	Non-canonical_RBP
ENSG00000048991	R3HDM1	23518	KIAA0029|R3HDM	R3H domain containing 1	R3H
ENSG00000049541	RFC2	5982	A1|RFC40	replication factor C subunit 2	Non-canonical_RBP
ENSG00000049883	PTCD2	79810	FLJ12598	pentatricopeptide repeat domain 2	MRP-S27
ENSG00000050405	LIMA1	51474	EPLIN	LIM domain and actin binding 1	Non-canonical_RBP
ENSG00000050748	MAPK9	5601	JNK2|p54a|SAPK|PRKM9	mitogen-activated protein kinase 9	RIO1
ENSG00000051341	POLQ	10721	POLH	DNA polymerase theta	DEAD
ENSG00000051596	THOC3	84321	TEX1|MGC5469	THO complex 3	eIF2A
ENSG00000052126	PLEKHA5	54477	PEPP2|KIAA1686|FLJ10667	pleckstrin homology domain containing A5	Non-canonical_RBP
ENSG00000052749	RRP12	23223	KIAA0690	ribosomal RNA processing 12 homolog	NUC173
ENSG00000053372	MRTO4	51154	dJ657E11.4|MRT4|C1orf33	MRT4 homolog, ribosome maturation factor	Ribosomal_L10
ENSG00000054118	THRAP3	9967	TRAP150|BCLAF2	thyroid hormone receptor associated protein 3	THRAP3_BCLAF1
ENSG00000054267	ARID4B	51742	BCAA|BRCAA1|SAP180|RBP1L1	AT-rich interaction domain 4B	Tudor-knot
ENSG00000054523	KIF1B	23095	KIAA0591|KLP|HMSNII|CMT2A|CMT2	kinesin family member 1B	Non-canonical_RBP
ENSG00000054654	SYNE2	23224	SYNE-2|DKFZP434H2235|Nesprin-2|NUANCE|NUA|KIAA1011|Nesp2	spectrin repeat containing nuclear envelope protein 2	Non-canonical_RBP
ENSG00000055044	NOP58	51602	NOP5|HSPC120	NOP58 ribonucleoprotein	Nop
ENSG00000055130	CUL1	8454	N	cullin 1	Non-canonical_RBP
ENSG00000055163	CYFIP2	26999	PIR121	cytoplasmic FMR1 interacting protein 2	Non-canonical_RBP
ENSG00000055208	TAB2	23118	KIAA0733|MAP3K7IP2	TGF-beta activated kinase 1 (MAP3K7) binding protein 2	Non-canonical_RBP
ENSG00000055332	EIF2AK2	5610	PKR|EIF2AK1|PPP1R83|PRKR	eukaryotic translation initiation factor 2 alpha kinase 2	dsrm
ENSG00000055483	USP36	57602	KIAA1453|FLJ12851	ubiquitin specific peptidase 36	Non-canonical_RBP
ENSG00000055917	PUM2	23369	PUMH2|KIAA0235	pumilio RNA binding family member 2	PUF
ENSG00000055950	MRPL43	84545	bMRP36a	mitochondrial ribosomal protein L43	L51_S25_CI-B8
ENSG00000056097	ZFR	51663	ZFR1|SPG71	zinc finger RNA binding protein	DZF
ENSG00000056586	RC3H2	54542	FLJ20301|FLJ20713|RNF164|MNAB	ring finger and CCCH-type domains 2	zf-CCCH
ENSG00000057294	PKP2	5318	N	plakophilin 2	Non-canonical_RBP
ENSG00000057608	GDI2	2665	RABGDIB	GDP dissociation inhibitor 2	Non-canonical_RBP
ENSG00000058262	SEC61A1	29927	N	Sec61 translocon alpha 1 subunit	Non-canonical_RBP
ENSG00000058272	PPP1R12A	4659	MBS|M130|MYPT1	protein phosphatase 1 regulatory subunit 12A	Non-canonical_RBP
ENSG00000058673	ZC3H11A	9877	KIAA0663|ZC3HDC11A	zinc finger CCCH-type containing 11A	Non-canonical_RBP
ENSG00000058729	RIOK2	55781	FLJ11159	RIO kinase 2	RIO1
ENSG00000059145	UNKL	64718	ZC3HDC5L|ZC3H5L|FLJ23360|C16orf28	unk like zinc finger	zf-CCCH
ENSG00000059378	PARP12	64761	FLJ22693|PARP-12|ZC3H1|ZC3HDC1	poly(ADP-ribose) polymerase family member 12	PARP
ENSG00000059573	ALDH18A1	5832	P5CS|GSAS|PYCS|SPG9	aldehyde dehydrogenase 18 family member A1	Non-canonical_RBP
ENSG00000059588	TARBP1	6894	TRP-185|TRM3|TRMT3	TAR (HIV-1) RNA binding protein 1	SpoU_methylase
ENSG00000059691	GATB	5188	PET112L|PET112	glutamyl-tRNA amidotransferase subunit B	GatB_Yqey
ENSG00000060138	YBX3	8531	dbpA|ZONAB|CSDA1|CSDA	Y-box binding protein 3	CSD
ENSG00000060237	WNK1	65125	HSAN2|PPP1R167|PRKWNK1|HSN2	WNK lysine deficient protein kinase 1	Non-canonical_RBP
ENSG00000060339	CCAR1	55749	FLJ10590|CARP-1|CARP1	cell division cycle and apoptosis regulator 1	S1-like
ENSG00000060491	OGFR	11054	7-60	opioid growth factor receptor	Non-canonical_RBP
ENSG00000060688	SNRNP40	9410	PRP8BP|SPF38|PRPF8BP|HPRP8BP|WDR57	small nuclear ribonucleoprotein U5 subunit 40	Non-canonical_RBP
ENSG00000061936	SFSWAP	6433	SWAP|SFRS8	splicing factor SWAP	DRY_EERY
ENSG00000062370	ZNF112	7771	ZFP112|ZNF228	zinc finger protein 112	zf-C2H2
ENSG00000062485	CS	1431	N	citrate synthase	Non-canonical_RBP
ENSG00000062582	MRPS24	64951	MRP-S24|HSPC335	mitochondrial ribosomal protein S24	MRP-S24
ENSG00000062650	WAPL	23063	FOE|KIAA0261|WAPAL	WAPL cohesin release factor	Non-canonical_RBP
ENSG00000062822	POLD1	5424	CDC2|POLD	DNA polymerase delta 1, catalytic subunit	Non-canonical_RBP
ENSG00000063046	EIF4B	1975	N	eukaryotic translation initiation factor 4B	RRM_1
ENSG00000063177	RPL18	6141	L18	ribosomal protein L18	Non-canonical_RBP
ENSG00000063244	U2AF2	11338	U2AF65	U2 small nuclear RNA auxiliary factor 2	RRM_1
ENSG00000063854	HAGH	3029	GLO2|GLXII|HAGH1	hydroxyacylglutathione hydrolase	Lactamase_B
ENSG00000064419	TNPO3	23534	TRN-SR|MTR10A|TRN-SR2|IPO12|LGMD1F	transportin 3	Xpo1
ENSG00000064607	SUGP2	10147	KIAA0365|SFRS14	SURP and G-patch domain containing 2	Surp
ENSG00000064651	SLC12A2	6558	NKCC1|BSC|BSC2|PPP1R141	solute carrier family 12 member 2	Non-canonical_RBP
ENSG00000064666	CNN2	1265	N	calponin 2	Non-canonical_RBP
ENSG00000064703	DDX20	11218	DP103|GEMIN3	DEAD-box helicase 20	DEAD
ENSG00000064932	SBNO2	22904	FLJ00173|Stno|Sno|KIAA0963	strawberry notch homolog 2	ResIII
ENSG00000065000	AP3D1	8943	ADTD	adaptor related protein complex 3 subunit delta 1	Non-canonical_RBP
ENSG00000065135	GNAI3	2773	87U6	G protein subunit alpha i3	Non-canonical_RBP
ENSG00000065150	IPO5	3843	IMB3|MGC2068|Pse1|KPNB3|RANBP5	importin 5	IBN_N
ENSG00000065154	OAT	4942	HOGA	ornithine aminotransferase	Non-canonical_RBP
ENSG00000065183	WDR3	10885	FLJ12796|UTP12|DIP2	WD repeat domain 3	Utp12
ENSG00000065243	PKN2	5586	PRK2|Pak-2|STK7|PRKCL2	protein kinase N2	Non-canonical_RBP
ENSG00000065268	WDR18	57418	Ipi3	WD repeat domain 18	Non-canonical_RBP
ENSG00000065427	KARS	3735	KARS2|KARS1|DFNB89	lysyl-tRNA synthetase	tRNA-synt_2
ENSG00000065457	ADAT1	23536	N	adenosine deaminase tRNA specific 1	A_deamin
ENSG00000065526	SPEN	23013	KIAA0929|MINT|SHARP|RBM15C	spen family transcriptional repressor	RRM_1
ENSG00000065548	ZC3H15	55854	LEREPO4	zinc finger CCCH-type containing 15	zf-CCCH
ENSG00000065613	SLK	9748	STK2|se20-9|KIAA0204	STE20 like kinase	Non-canonical_RBP
ENSG00000065883	CDK13	8621	CHED|CDC2L|KIAA1791|CDC2L5	cyclin dependent kinase 13	Non-canonical_RBP
ENSG00000065978	YBX1	4904	YB-1|YB1|DBPB|NSEP-1|MDR-NF1|BP-8|CSDB|CSDA2|NSEP1	Y-box binding protein 1	CSD
ENSG00000066044	ELAVL1	1994	HuR|Hua|MelG|HUR	ELAV like RNA binding protein 1	RRM_1
ENSG00000066084	DIP2B	57609	KIAA1463|FLJ34278	disco interacting protein 2 homolog B	Non-canonical_RBP
ENSG00000066279	ASPM	259266	Calmbp1|ASP|FLJ10517|FLJ10549|MCPH5	abnormal spindle microtubule assembly	Non-canonical_RBP
ENSG00000066557	LRRC40	55631	FLJ20331	leucine rich repeat containing 40	Non-canonical_RBP
ENSG00000066651	TRMT11	60487	MDS024|dJ187J11.2|TRM11|TRMT11-1|C6orf75	tRNA methyltransferase 11 homolog	UPF0020
ENSG00000066654	THUMPD1	55623	FLJ20274|Tan1	THUMP domain containing 1	THUMP
ENSG00000067048	DDX3Y	8653	DBY	DEAD-box helicase 3 Y-linked	DEAD
ENSG00000067225	PKM	5315	THBP1|OIP3|PK3|PKM2	pyruvate kinase M1/2	Non-canonical_RBP
ENSG00000067248	DHX29	54505	DDX29	DExH-box helicase 29	HA2
ENSG00000067334	DNTTIP2	30836	HSU15552|ERBP|TdIF2	deoxynucleotidyltransferase terminal interacting protein 2	Fcf2
ENSG00000067369	TP53BP1	7158	53BP1|p202|TDRD30	tumor protein p53 binding protein 1	Non-canonical_RBP
ENSG00000067533	RRP15	51018	CGI-115|KIAA0507	ribosomal RNA processing 15 homolog	Rrp15p
ENSG00000067596	DHX8	1659	HRH1|PRP22|PRPF22|Dhr2|DDX8	DEAH-box helicase 8	HA2
ENSG00000067704	IARS2	55699	FLJ10326	isoleucyl-tRNA synthetase 2, mitochondrial	tRNA-synt_1
ENSG00000067900	ROCK1	6093	p160ROCK	Rho associated coiled-coil containing protein kinase 1	Non-canonical_RBP
ENSG00000068097	HEATR6	63897	ABC1|FLJ22087	HEAT repeat containing 6	Non-canonical_RBP
ENSG00000068120	COASY	80347	DPCK|NBP|CoASY|PPAT	Coenzyme A synthase	Non-canonical_RBP
ENSG00000068383	INPP5A	3632	5PTASE	inositol polyphosphate-5-phosphatase A	Exo_endo_phos
ENSG00000068394	GPKOW	27238	T54|GPATC5|GPATCH5|Spp2	G-patch domain and KOW motifs	KOW
ENSG00000068438	FTSJ1	24140	JM23|CDLIV|SPB1|TRM7|TRMT7|MRX9|MRX44	FtsJ RNA 2'-O-methyltransferase 1	FtsJ
ENSG00000068654	POLR1A	25885	DKFZP586M0122|FLJ21915|RPO1-4|RPA1	RNA polymerase I subunit A	RNA_pol_Rpb1_5
ENSG00000068784	SRBD1	55133	FLJ10379	S1 RNA binding domain 1	S1
ENSG00000068796	KIF2A	3796	HK2|KIF2	kinesin family member 2A	Non-canonical_RBP
ENSG00000068878	PSME4	23198	PA200|KIAA0077	proteasome activator subunit 4	Non-canonical_RBP
ENSG00000069248	NUP133	55746	FLJ10814	nucleoporin 133	Non-canonical_RBP
ENSG00000069275	NUCKS1	64710	NUCKS	nuclear casein kinase and cyclin dependent kinase substrate 1	Non-canonical_RBP
ENSG00000069329	VPS35	55737	FLJ10752|MEM3|PARK17	VPS35 retromer complex component	Non-canonical_RBP
ENSG00000070047	PHRF1	57661	KIAA1542|PPP1R125|RNF221	PHD and ring finger domains 1	Non-canonical_RBP
ENSG00000070061	ELP1	8518	IKAP|TOT1|IKI3|DYS|IKBKAP	elongator complex protein 1	Non-canonical_RBP
ENSG00000070087	PFN2	5217	N	profilin 2	Non-canonical_RBP
ENSG00000070366	SMG6	23293	KIAA0732|SMG-6|EST1A|C17orf31	SMG6 nonsense mediated mRNA decay factor	EST1_DNA_bind
ENSG00000070495	JMJD6	23210	PTDSR1|KIAA0585|PTDSR	jumonji domain containing 6, arginine demethylase and lysine hydroxylase	Non-canonical_RBP
ENSG00000070669	ASNS	440	N	asparagine synthetase (glutamine-hydrolyzing)	Non-canonical_RBP
ENSG00000070756	PABPC1	26986	PABP1|PABPL1|PAB1|PABPC2	poly(A) binding protein cytoplasmic 1	RRM_1
ENSG00000070814	TCOF1	6949	treacle|TCS	treacle ribosome biogenesis factor 1	Non-canonical_RBP
ENSG00000070950	RAD18	56852	RNF73	RAD18 E3 ubiquitin protein ligase	SAP
ENSG00000071054	MAP4K4	9448	HGK|NIK|FLH21957	mitogen-activated protein kinase kinase kinase kinase 4	Non-canonical_RBP
ENSG00000071082	RPL31	6160	L31	ribosomal protein L31	Ribosomal_L31e
ENSG00000071127	WDR1	9948	N	WD repeat domain 1	Non-canonical_RBP
ENSG00000071462	BUD23	114049	MGC19709|MGC2022|MGC5140|PP3381|WBMT|MERM1|WBSCR22	BUD23 rRNA methyltransferase and ribosome maturation factor	Non-canonical_RBP
ENSG00000071626	DAZAP1	26528	MGC19907	DAZ associated protein 1	RRM_1
ENSG00000071655	MBD3	53615	-	methyl-CpG binding domain protein 3	MBD
ENSG00000071794	HLTF	6596	HIP116A|HLTF1|RNF80|SNF2L3|SMARCA3	helicase like transcription factor	Non-canonical_RBP
ENSG00000071859	FAM50A	9130	DXS9928E|XAP5|HXC-26|9F	family with sequence similarity 50 member A	Non-canonical_RBP
ENSG00000071894	CPSF1	29894	CPSF160	cleavage and polyadenylation specific factor 1	CPSF_A
ENSG00000072110	ACTN1	87	N	actinin alpha 1	Non-canonical_RBP
ENSG00000072274	TFRC	7037	CD71|TFR1|p90	transferrin receptor	Non-canonical_RBP
ENSG00000072364	AFF4	27125	AF5Q31|MCEF	AF4/FMR2 family member 4	AF-4
ENSG00000072501	SMC1A	8243	DXS423E|KIAA0178|SB1.8|Smcb|SMC1L1	structural maintenance of chromosomes 1A	Non-canonical_RBP
ENSG00000072506	HSD17B10	3028	ERAB|MHBD|17b-HSD10|ABAD|SDR5C1|MRPP2|CAMR|HADH2|MRXS10	hydroxysteroid 17-beta dehydrogenase 10	Non-canonical_RBP
ENSG00000072682	P4HA2	8974	C-P4Halpha(II)	prolyl 4-hydroxylase subunit alpha 2	hmm_2OG-FeII_Oxy
ENSG00000072756	TRNT1	51095	MtCCA|CGI-47|CCA1	tRNA nucleotidyl transferase 1	PolyA_pol
ENSG00000072778	ACADVL	37	VLCAD|LCACD|ACAD6	acyl-CoA dehydrogenase very long chain	Non-canonical_RBP
ENSG00000072858	SIDT1	54847	FLJ20174|SID-1	SID1 transmembrane family member 1	SID-1_RNA_chan
ENSG00000073111	MCM2	4171	D3S3194|KIAA0030|BM28|cdc19|DFNA70|CCNL1|CDCL1	minichromosome maintenance complex component 2	Non-canonical_RBP
ENSG00000073536	NLE1	54475	FLJ10458|NLE	notchless homolog 1	Non-canonical_RBP
ENSG00000073578	SDHA	6389	FP|SDHF|SDH2	succinate dehydrogenase complex flavoprotein subunit A	Non-canonical_RBP
ENSG00000073712	FERMT2	10979	mig-2|KIND2|UNC112B|PLEKHC1	fermitin family member 2	Non-canonical_RBP
ENSG00000073792	IGF2BP2	10644	IMP-2	insulin like growth factor 2 mRNA binding protein 2	KH_1
ENSG00000073969	NSF	4905	SKD2|SEC18	N-ethylmaleimide sensitive factor, vesicle fusing ATPase	Non-canonical_RBP
ENSG00000074054	CLASP1	23332	KIAA0622|MAST1	cytoplasmic linker associated protein 1	Non-canonical_RBP
ENSG00000074071	MRPS34	65993	MRP-S12|MGC2616	mitochondrial ribosomal protein S34	Non-canonical_RBP
ENSG00000074356	NCBP3	55421	HSA277841|ELG|C17orf85	nuclear cap binding subunit 3	NCBP3
ENSG00000074590	NUAK1	9891	ARK5|KIAA0537|NuaK1	NUAK family kinase 1	RIO1
ENSG00000074695	LMAN1	3998	MR60|ERGIC-53|ERGIC53|gp58|MCFD1|FMFD1|F5F8D	lectin, mannose binding 1	Non-canonical_RBP
ENSG00000074696	HACD3	51495	B-ind1|HSPC121|PTPLAD1	3-hydroxyacyl-CoA dehydratase 3	Non-canonical_RBP
ENSG00000074755	ZZEF1	23140	KIAA0399|ZZZ4|FLJ10821	zinc finger ZZ-type and EF-hand domain containing 1	Non-canonical_RBP
ENSG00000074800	ENO1	2023	PPH|MBP-1|ENO1L1|MPB1	enolase 1	Non-canonical_RBP
ENSG00000075151	EIF4G3	8672	eIF4GII	eukaryotic translation initiation factor 4 gamma 3	MIF4G
ENSG00000075218	GTSE1	51512	GTSE-1|B99	G2 and S-phase expressed 1	Non-canonical_RBP
ENSG00000075239	ACAT1	38	THIL|ACAT	acetyl-CoA acetyltransferase 1	Non-canonical_RBP
ENSG00000075292	ZNF638	27332	NP220|MGC26130|Zfp638|ZFML	zinc finger protein 638	RRM_1
ENSG00000075413	MARK3	4140	CTAK1|KP78|PAR-1A	microtubule affinity regulating kinase 3	RIO1
ENSG00000075420	FNDC3B	64778	FAD104|DKFZp762K137|FLJ23399|PRO4979|YVTM2421	fibronectin type III domain containing 3B	Non-canonical_RBP
ENSG00000075539	FRYL	285527	DKFZp686E205|AF4p12|MOR2|KIAA0826	FRY like transcription coactivator	Non-canonical_RBP
ENSG00000075568	TMEM131	23505	CC28|YR-23|RW1|KIAA0257|PRO1048	transmembrane protein 131	Non-canonical_RBP
ENSG00000075618	FSCN1	6624	p55|FLJ38511|SNL	fascin actin-bundling protein 1	Non-canonical_RBP
ENSG00000075702	WDR62	284403	DKFZP434J046|FLJ33298|C19orf14|MCPH2	WD repeat domain 62	Non-canonical_RBP
ENSG00000075785	RAB7A	7879	RAB7	RAB7A, member RAS oncogene family	MMR_HSR1
ENSG00000075856	SART3	9733	KIAA0156|RP11-13G14|TIP110|p110	spliceosome associated factor 3, U4/U6 recycling protein	RRM_1
ENSG00000075914	EXOSC7	23016	hRrp42p|Rrp42p|RRP42|EAP1|KIAA0116|p8	exosome component 7	RNase_PH
ENSG00000075975	MKRN2	23609	RNF62|HSPC070	makorin ring finger protein 2	zf-CCCH
ENSG00000076003	MCM6	4175	Mis5	minichromosome maintenance complex component 6	Non-canonical_RBP
ENSG00000076043	REXO2	25996	DKFZP566E144|SFN|CGI-114	RNA exonuclease 2	RNase_T
ENSG00000076053	RBM7	10179	N	RNA binding motif protein 7	RRM_1
ENSG00000076067	RBMS2	5939	SCR3	RNA binding motif single stranded interacting protein 2	RRM_1
ENSG00000076108	BAZ2A	11176	KIAA0314|TIP5|WALp3	bromodomain adjacent to zinc finger domain 2A	MBD
ENSG00000076201	PTPN23	25930	DKFZP564F0923|KIAA1471|HD-PTP	protein tyrosine phosphatase non-receptor type 23	Non-canonical_RBP
ENSG00000076382	SPAG5	10615	DEEPEST|MAP126|hMAP126	sperm associated antigen 5	Non-canonical_RBP
ENSG00000076650	GPATCH1	55094	ECGP|FLJ10206|FLJ38686|GPATC1	G-patch domain containing 1	DUF1604
ENSG00000076770	MBNL3	55796	CHCR|FLJ11316|MBLX39|MBXL	muscleblind like splicing regulator 3	zf-CCCH
ENSG00000076924	XAB2	56949	HCNP|HCRN|SYF1|NTC90	XPA binding protein 2	Non-canonical_RBP
ENSG00000076928	ARHGEF1	9138	P115-RHOGEF|SUB1.5|LBCL2	Rho guanine nucleotide exchange factor 1	Non-canonical_RBP
ENSG00000077097	TOP2B	7155	N	DNA topoisomerase II beta	Non-canonical_RBP
ENSG00000077147	TM9SF3	56889	SMBP	transmembrane 9 superfamily member 3	Non-canonical_RBP
ENSG00000077235	GTF3C1	2975	TFIIIC220	general transcription factor IIIC subunit 1	Non-canonical_RBP
ENSG00000077312	SNRPA	6626	U1A|U1-A|Mud1	small nuclear ribonucleoprotein polypeptide A	RRM_1
ENSG00000077348	EXOSC5	56915	hRrp46p|Rrp46p|RRP46|RRP41B|MGC12901|p12B	exosome component 5	RNase_PH
ENSG00000077380	DYNC1I2	1781	DIC74|DNCI2	dynein cytoplasmic 1 intermediate chain 2	Non-canonical_RBP
ENSG00000077549	CAPZB	832	N	capping actin protein of muscle Z-line subunit beta	Non-canonical_RBP
ENSG00000078070	MCCC1	56922	MCCA	methylcrotonoyl-CoA carboxylase 1	RimK
ENSG00000078269	SYNJ2	8871	INPP5H	synaptojanin 2	DUF1866
ENSG00000078328	RBFOX1	54715	A2BP1|FOX-1|HRNBP1	RNA binding fox-1 homolog 1	Fox-1_C
ENSG00000078618	NRDC	4898	hNRD1|hNRD2|NRD1	nardilysin convertase	Non-canonical_RBP
ENSG00000078687	TNRC6C	57690	KIAA1582|FLJ20015	trinucleotide repeat containing adaptor 6C	Ago_hook
ENSG00000078814	MYH7B	57644	KIAA1512|dJ756N5.1|MYH14|MHC14	myosin heavy chain 7B	Non-canonical_RBP
ENSG00000079134	THOC1	9984	P84|HPR1	THO complex 1	efThoc1
ENSG00000079246	XRCC5	7520	KU80|KARP-1|Ku86|KUB2	X-ray repair cross complementing 5	Non-canonical_RBP
ENSG00000079313	REXO1	57455	EloA-BP1|KIAA1138|TCEB3BP1	RNA exonuclease 1 homolog	RNase_T
ENSG00000079332	SAR1A	56681	SAR1|Sara|SARA1	secretion associated Ras related GTPase 1A	MMR_HSR1
ENSG00000079785	DDX1	1653	DBP-RB	DEAD-box helicase 1	DEAD
ENSG00000079819	EPB41L2	2037	4.1-G	erythrocyte membrane protein band 4.1 like 2	Non-canonical_RBP
ENSG00000079974	RABL2B	11158	-	RAB, member of RAS oncogene family like 2B	MMR_HSR1
ENSG00000080007	DDX43	55510	HAGE|DKFZp434H2114|CT13	DEAD-box helicase 43	DEAD
ENSG00000080345	RIF1	55183	FLJ12870|FLJ10599	replication timing regulatory factor 1	Rif1_N
ENSG00000080503	SMARCA2	6595	BAF190|hSNF2a|hBRM|Sth1p|SNF2LA|BRM|SNF2|SWI2|SNF2L2	SWI/SNF related, matrix associated, actin dependent regulator of chromatin, subfamily a, member 2	BRK
ENSG00000080603	SRCAP	10847	KIAA0309|EAF1|SWR1|DOMO1	Snf2 related CREBBP activator protein	ResIII
ENSG00000080608	PUM3	9933	XTP5|PEN|PUF6|hPUF-A|HA-8|KIAA0020	pumilio RNA binding family member 3	CPL
ENSG00000080802	CNOT4	4850	CLONE243|NOT4H|NOT4	CCR4-NOT transcription complex subunit 4	RRM_1
ENSG00000080824	HSP90AA1	3320	Hsp89|Hsp90|FLJ31884|HSP90N|HSPC1|HSPCA	heat shock protein 90 alpha family class A member 1	Non-canonical_RBP
ENSG00000081177	EXD2	55218	FLJ10738|C14orf114|EXDL2	exonuclease 3'-5' domain containing 2	DNA_pol_A_exo1
ENSG00000082068	WDR70	55100	FLJ10233	WD repeat domain 70	Non-canonical_RBP
ENSG00000082153	BZW1	9689	BZAP45|KIAA0005	basic leucine zipper and W2 domains 1	W2
ENSG00000082515	MRPL22	29093	MRP-L25|RPML25|HSPC158	mitochondrial ribosomal protein L22	Ribosomal_L22
ENSG00000082516	GEMIN5	25929	N	gem nuclear organelle associated protein 5	Non-canonical_RBP
ENSG00000082898	XPO1	7514	CRM1|CRM-1|emb	exportin 1	CRM1_C
ENSG00000083223	TUT7	79670	KIAA1711|FLJ13409|PAPD6|TENT3B|ZCCHC6	terminal uridylyl transferase 7	PAP_assoc
ENSG00000083290	ULK2	9706	KIAA0623|Unc51.2|ATG1B	unc-51 like autophagy activating kinase 2	RIO1
ENSG00000083312	TNPO1	3842	MIP|TRN|IPO2|MIP1|KPNB2	transportin 1	IBN_N
ENSG00000083444	PLOD1	5351	LH1|LLH|PLOD	procollagen-lysine,2-oxoglutarate 5-dioxygenase 1	hmm_2OG-FeII_Oxy
ENSG00000083520	DIS3	22894	dis3p|RRP44|EXOSC11|KIAA1008	DIS3 homolog, exosome endoribonuclease and 3'-5' exoribonuclease	RNB
ENSG00000083544	TDRD3	81550	FLJ21007	tudor domain containing 3	TUDOR
ENSG00000083635	NUFIP1	26747	NUFIP	nuclear FMR1 interacting protein 1	NUFIP1
ENSG00000083642	PDS5B	23047	AS3|KIAA0979|FLJ23236|CG008|APRIN	PDS5 cohesin associated factor B	Non-canonical_RBP
ENSG00000083750	RRAGB	10325	-	Ras related GTP binding B	MMR_HSR1
ENSG00000083845	RPS5	6193	S5	ribosomal protein S5	Ribosomal_S7
ENSG00000083896	YTHDC1	91746	YT521|KIAA1966|YT521-B	YTH domain containing 1	YTH
ENSG00000084072	PPIE	10450	CyP-33|MGC3736|MGC111222	peptidylprolyl isomerase E	RRM_1
ENSG00000084073	ZMPSTE24	10269	FACE-1|Ste24p|STE24|HGPS|PRO1	zinc metallopeptidase STE24	Non-canonical_RBP
ENSG00000084092	NOA1	84273	MGC3232|hAtNOS1|hNOA1|MTG3|C4orf14	nitric oxide associated 1	MMR_HSR1
ENSG00000084463	WBP11	51729	NPWBP|SIPP1|PPP1R165	WW domain binding protein 11	Non-canonical_RBP
ENSG00000084652	TXLNA	200081	DKFZp451J0118	taxilin alpha	Non-canonical_RBP
ENSG00000084674	APOB	338	N	apolipoprotein B	Non-canonical_RBP
ENSG00000084733	RAB10	10890	-	RAB10, member RAS oncogene family	Non-canonical_RBP
ENSG00000084754	HADHA	3030	GBP|LCEH|LCHAD|MTPA	hydroxyacyl-CoA dehydrogenase trifunctional multienzyme complex subunit alpha	Non-canonical_RBP
ENSG00000085224	ATRX	546	XH2|XNP|RAD54|JMS|MRX52	ATRX chromatin remodeler	Non-canonical_RBP
ENSG00000085274	MYNN	55892	SBBIZ1|ZBTB31|ZNF902	myoneurin	zf-C2H2
ENSG00000085719	CPNE3	8895	N	copine 3	Non-canonical_RBP
ENSG00000085733	CTTN	2017	EMS1	cortactin	Non-canonical_RBP
ENSG00000085760	MTIF2	4528	IF-2mt	mitochondrial translational initiation factor 2	GTP_EFTU
ENSG00000085832	EPS15	2060	AF-1P|MLLT5	epidermal growth factor receptor pathway substrate 15	Non-canonical_RBP
ENSG00000085872	CHERP	10523	ERPROT213-21|DAN16	calcium homeostasis endoplasmic reticulum protein	Surp
ENSG00000085999	RAD54L	8438	hHR54|hRAD54|RAD54A	RAD54 like	ResIII
ENSG00000086061	DNAJA1	3301	HSPF4|hdj-2|dj-2|NEDD7|HSJ2	DnaJ heat shock protein family (Hsp40) member A1	Non-canonical_RBP
ENSG00000086102	NFX1	4799	NFX2|MGC20369|Tex42|TEG-42	nuclear transcription factor, X-box binding 1	R3H
ENSG00000086189	DIMT1	27292	HSA9761|DIMT1L	DIMT1 rRNA methyltransferase and ribosome maturation factor	RrnaAD
ENSG00000086200	IPO11	51194	RanBP11	importin 11	IBN_N
ENSG00000086504	MRPL28	10573	p15|MAAT1	mitochondrial ribosomal protein L28	Ribosomal_L28
ENSG00000086589	RBM22	55696	FLJ10290|ZC3H16|fSAP47|Cwc2	RNA binding motif protein 22	RRM_1
ENSG00000086712	TXLNG	55787	FLJ11209|LSR5|FIAT|MGC126621|MGC126625|TXLNGX|CXorf15	taxilin gamma	Non-canonical_RBP
ENSG00000086758	HUWE1	10075	Ib772|KIAA0312|UREB1	HECT, UBA and WWE domain containing E3 ubiquitin protein ligase 1	Non-canonical_RBP
ENSG00000086827	ZW10	9183	KNTC1AP	zw10 kinetochore protein	Non-canonical_RBP
ENSG00000087077	TRIP6	7205	ZRP-1|OIP1|MGC10556|MGC10558|MGC29959|MGC3837|MGC4423	thyroid hormone receptor interactor 6	Non-canonical_RBP
ENSG00000087087	SRRT	51593	Asr2|serrate|ARS2	serrate, RNA effector molecule	ARS2
ENSG00000087191	PSMC5	5705	SUG1|p45/SUG|TBP10|p45|S8|TRIP1|SUG-1	proteasome 26S subunit, ATPase 5	Non-canonical_RBP
ENSG00000087269	NOP14	8602	RES4-25|UTP2|C4orf9|NOL14	NOP14 nucleolar protein	Nop14
ENSG00000087274	ADD1	118	N	adducin 1	Non-canonical_RBP
ENSG00000087365	SF3B2	10992	SAP145|SF3b1|Cus1|SF3b145	splicing factor 3b subunit 2	DUF382
ENSG00000087470	DNM1L	10059	DRP1|DVLP|HDYNIV|DYMPLE|VPS1	dynamin 1 like	MMR_HSR1
ENSG00000087995	METTL2A	339175	FLJ12760|METTL2	methyltransferase like 2A	Methyltransf_31
ENSG00000088038	CNOT3	4849	NOT3H|KIAA0691|LENG2|NOT3	CCR4-NOT transcription complex subunit 3	Not3
ENSG00000088205	DDX18	8886	MrDb|Has1	DEAD-box helicase 18	DEAD
ENSG00000088247	KHSRP	8570	KSRP|FBP2|FUBP2	KH-type splicing regulatory protein	KH_1
ENSG00000088325	TPX2	22974	p100|DIL-2|C20orf2|C20orf1	TPX2 microtubule nucleation factor	Non-canonical_RBP
ENSG00000088930	XRN2	22803	N	5'-3' exoribonuclease 2	XRN_N
ENSG00000088986	DYNLL1	8655	hdlc1|DLC1|PIN|LC8|DLC8|DNCL1	dynein light chain LC8-type 1	Non-canonical_RBP
ENSG00000089009	RPL6	6128	TAXREB107|L6|TXREB1	ribosomal protein L6	Ribosomal_L6e
ENSG00000089048	ESF1	51575	bA526K24.1|C20orf6	ESF1 nucleolar pre-rRNA processing protein homolog	NUC153
ENSG00000089127	OAS1	4938	OIASI|IFI-4|OIAS	2'-5'-oligoadenylate synthetase 1	OAS1_C
ENSG00000089154	GCN1	10985	KIAA0219|GCN1L|GCN1L1	GCN1 activator of EIF2AK4	Non-canonical_RBP
ENSG00000089157	RPLP0	6175	PRLP0|P0|L10E|RPP0|LP0	ribosomal protein lateral stalk subunit P0	Ribosomal_L10
ENSG00000089159	PXN	5829	N	paxillin	Non-canonical_RBP
ENSG00000089195	TRMT6	51605	GCD10|MGC5029|Gcd10p|CGI-09	tRNA methyltransferase 6	Gcd10p
ENSG00000089220	PEBP1	5037	RKIP|HCNP|PEBP|PBP	phosphatidylethanolamine binding protein 1	Non-canonical_RBP
ENSG00000089280	FUS	2521	TLS|FUS1|hnRNP-P2|HNRNPP2|ALS6	FUS RNA binding protein	zf-RanBP
ENSG00000089597	GANAB	23193	GluII|G2AN|KIAA0088|GIIA	glucosidase II alpha subunit	Non-canonical_RBP
ENSG00000089682	RBM41	55285	FLJ11016	RNA binding motif protein 41	RRM_1
ENSG00000089737	DDX24	57062	N	DEAD-box helicase 24	DEAD
ENSG00000089876	DHX32	55760	FLJ10889|FLJ10694|DHLP1|DDX32	DEAH-box helicase 32 (putative)	HA2
ENSG00000090060	PAPOLA	10914	PAP	poly(A) polymerase alpha	PAP_RNA-bind
ENSG00000090061	CCNK	8812	CPR4	cyclin K	Non-canonical_RBP
ENSG00000090097	PCBP4	57060	MCG10|LIP4	poly(rC) binding protein 4	KH_1
ENSG00000090263	MRPS33	51650	CGI-139	mitochondrial ribosomal protein S33	MRP-S33
ENSG00000090273	NUDC	10726	NudC	nuclear distribution C, dynein complex regulator	Non-canonical_RBP
ENSG00000090530	P3H2	55214	FLJ10718|MLAT4|LEPREL1	prolyl 3-hydroxylase 2	hmm_2OG-FeII_Oxy
ENSG00000090615	GOLGA3	2802	golgin-160|GCP170|MEA-2	golgin A3	Non-canonical_RBP
ENSG00000090621	PABPC4	8761	iPABP|APP-1	poly(A) binding protein cytoplasmic 4	RRM_1
ENSG00000090861	AARS	16	CMT2N|AlaRS	alanyl-tRNA synthetase	tRNA-synt_2c
ENSG00000090889	KIF4A	24137	KIF4-G1|KIF4|HSA271784|FLJ12530|FLJ12655|FLJ14204|FLJ20631|MRX100	kinesin family member 4A	Non-canonical_RBP
ENSG00000090905	TNRC6A	27327	CAGH26|KIAA1460|GW182|TNRC6	trinucleotide repeat containing adaptor 6A	Ago_hook
ENSG00000091009	RBM27	54439	KIAA1311|ARRS1|Psc1|ZC3H20	RNA binding motif protein 27	PWI
ENSG00000091127	PUS7	54517	FLJ20485	pseudouridine synthase 7	TruD
ENSG00000091140	DLD	1738	DLDH|E3|LAD|GCSL	dihydrolipoamide dehydrogenase	Non-canonical_RBP
ENSG00000091436	MAP3K20	51776	MLTKalpha|MLTKbeta|ZAK|MLTK|MLK7|MRK	mitogen-activated protein kinase kinase kinase 20	Non-canonical_RBP
ENSG00000091483	FH	2271	N	fumarate hydratase	Non-canonical_RBP
ENSG00000091527	CDV3	55573	H41	CDV3 homolog	Non-canonical_RBP
ENSG00000091542	ALKBH5	54890	FLJ20308|OFOXD1	alkB homolog 5, RNA demethylase	hmm_2OG-FeII_Oxy_2
ENSG00000091640	SPAG7	9552	FSA-1|ACRP|MGC20134	sperm associated antigen 7	R3H
ENSG00000091656	ZFHX4	79776	ZFH4|FLJ20980	zinc finger homeobox 4	zf-C2H2
ENSG00000091732	ZC3HC1	51530	NIPA	zinc finger C3HC-type containing 1	zf-C3HC
ENSG00000092148	HECTD1	25831	KIAA1131	HECT domain E3 ubiquitin protein ligase 1	Non-canonical_RBP
ENSG00000092199	HNRNPC	3183	hnRNPC|HNRPC	heterogeneous nuclear ribonucleoprotein C (C1/C2)	RRM_1
ENSG00000092201	SUPT16H	11198	FACT|FACTP140|SPT16/CDC68|FLJ14010|FLJ10857|CDC68	SPT16 homolog, facilitates chromatin remodeling subunit	Non-canonical_RBP
ENSG00000092208	GEMIN2	8487	SIP1	gem nuclear organelle associated protein 2	SIP1
ENSG00000092345	DAZL	1618	DAZH|SPGYLA|MGC26406|DAZL1|DAZLA	deleted in azoospermia like	RRM_1
ENSG00000092621	PHGDH	26227	SERA|PGDH|PDG	phosphoglycerate dehydrogenase	Non-canonical_RBP
ENSG00000092820	EZR	7430	VIL2	ezrin	Non-canonical_RBP
ENSG00000092841	MYL6	4637	ESMLC|MLC3NM|MLC1SM	myosin light chain 6	Non-canonical_RBP
ENSG00000092847	AGO1	26523	hAGO1|EIF2C1	argonaute RISC component 1	Piwi
ENSG00000092964	DPYSL2	1808	DRP-2|DHPRP2|CRMP2|DRP2	dihydropyrimidinase like 2	Non-canonical_RBP
ENSG00000092978	GPATCH2	55105	FLJ10252|CT110|PPP1R30|Pfa1|GPATC2	G-patch domain containing 2	G-patch
ENSG00000093000	NUP50	10762	NPAP60L	nucleoporin 50	Non-canonical_RBP
ENSG00000093167	LRRFIP2	9209	HUFI-2	LRR binding FLII interacting protein 2	LRRFIP
ENSG00000094804	CDC6	990	CDC18L	cell division cycle 6	Non-canonical_RBP
ENSG00000094914	AAAS	8086	N	aladin WD repeat nucleoporin	Non-canonical_RBP
ENSG00000095002	MSH2	4436	HNPCC|HNPCC1|COCA1	mutS homolog 2	Non-canonical_RBP
ENSG00000095139	ARCN1	372	COPD	archain 1	Non-canonical_RBP
ENSG00000095261	PSMD5	5711	S5B|KIAA0072	proteasome 26S subunit, non-ATPase 5	Non-canonical_RBP
ENSG00000095319	NUP188	23511	KIAA0169	nucleoporin 188	Non-canonical_RBP
ENSG00000095485	CWF19L1	55280	FLJ10998|hDrn1	CWF19 like cell cycle control factor 1	CwfJ_C_1
ENSG00000095564	BTAF1	9044	TAFII170|TAF172|MOT1|TAF-172|TAF(II)170	B-TFIID TATA-box binding protein associated factor 1	Non-canonical_RBP
ENSG00000095627	TDRD1	56165	CT41.1	tudor domain containing 1	TUDOR
ENSG00000096063	SRPK1	6732	SFRSK1	SRSF protein kinase 1	Non-canonical_RBP
ENSG00000096080	MRPS18A	55168	FLJ10548|MRPS18-3	mitochondrial ribosomal protein S18A	Ribosomal_S18
ENSG00000096384	HSP90AB1	3326	HSPC2|HSPCB	heat shock protein 90 alpha family class B member 1	Non-canonical_RBP
ENSG00000096401	CDC5L	988	PCDC5RP|hCDC5|CEF1|CDC5	cell division cycle 5 like	Myb_Cef
ENSG00000096433	ITPR3	3710	IP3R3	inositol 1,4,5-trisphosphate receptor type 3	Non-canonical_RBP
ENSG00000096696	DSP	1832	KPPS2|PPKS2|DPI|DPII	desmoplakin	Non-canonical_RBP
ENSG00000096746	HNRNPH3	3189	2H9|HNRPH3	heterogeneous nuclear ribonucleoprotein H3	RRM_1
ENSG00000099219	ERMP1	79956	FLJ23309|FXNA|KIAA1815	endoplasmic reticulum metallopeptidase 1	Non-canonical_RBP
ENSG00000099246	RAB18	22931	-	RAB18, member RAS oncogene family	MMR_HSR1
ENSG00000099381	SETD1A	9739	KIAA0339|Set1|KMT2F	SET domain containing 1A, histone lysine methyltransferase	RRM_1
ENSG00000099622	CIRBP	1153	CIRP	cold inducible RNA binding protein	RRM_1
ENSG00000099783	HNRNPM	4670	HTGR1|HNRNPM4|HNRPM4|CEAR|NAGR1|HNRPM	heterogeneous nuclear ribonucleoprotein M	RRM_1
ENSG00000099817	POLR2E	5434	RPB5|RPABC1|XAP4|hRPB25|hsRPB5	RNA polymerase II subunit E	RNA_pol_Rpb5_C
ENSG00000099821	POLRMT	5442	h-mtRPOL|APOLMT|MTRNAP|MTRPOL	RNA polymerase mitochondrial	RNA_pol
ENSG00000099860	GADD45B	4616	GADD45BETA|DKFZP566B133|MYD118	growth arrest and DNA damage inducible beta	Ribosomal_L7Ae
ENSG00000099899	TRMT2A	27037	HTF9C	tRNA methyltransferase 2 homolog A	tRNA_U5-meth_tr
ENSG00000099901	RANBP1	5902	HTF9A	RAN binding protein 1	Non-canonical_RBP
ENSG00000099917	MED15	51586	TIG-1|CAG7A|Arc105|TNRC7|PCQAP	mediator complex subunit 15	Non-canonical_RBP
ENSG00000099942	CRKL	1399	N	CRK like proto-oncogene, adaptor protein	Non-canonical_RBP
ENSG00000099995	SF3A1	10291	SF3a120|SAP114|PRPF21|Prp21	splicing factor 3a subunit 1	PRP21_like_P
ENSG00000100014	SPECC1L	23384	KIAA0376|CYTSA	sperm antigen with calponin homology and coiled-coil domains 1 like	Non-canonical_RBP
ENSG00000100028	SNRPD3	6634	SMD3|Sm-D3	small nuclear ribonucleoprotein D3 polypeptide	LSM
ENSG00000100029	PES1	23481	PES|NOP7	pescadillo ribosomal biogenesis factor 1	Pescadillo_N
ENSG00000100030	MAPK1	5594	ERK|ERK2|p41mapk|MAPK2|PRKM2|PRKM1	mitogen-activated protein kinase 1	Non-canonical_RBP
ENSG00000100038	TOP3B	8940	N	DNA topoisomerase III beta	Non-canonical_RBP
ENSG00000100056	ESS2	8220	DGSI|Es2el|ES2|DGS-H|ESS-2|bis1|DGCR13|DGCR14	ess-2 splicing factor homolog	Es2
ENSG00000100097	LGALS1	3956	GBP	galectin 1	Non-canonical_RBP
ENSG00000100105	PATZ1	23598	MAZR|dJ400N23|ZBTB19|ZSG|RIAZ|PATZ|ZNF278	POZ/BTB and AT hook containing zinc finger 1	zf-C2H2
ENSG00000100109	TFIP11	24144	TIP39|DKFZP434B194|Spp382	tuftelin interacting protein 11	G-patch
ENSG00000100129	EIF3L	51386	HSPC021|HSPC025|EIF3S11|EIF3S6IP|EIF3EIP	eukaryotic translation initiation factor 3 subunit L	Paf67
ENSG00000100138	SNU13	4809	FA-1|SPAG12|SNRNP15-5|15.5K|SSFA1|NHP2L1	small nuclear ribonucleoprotein 13	Ribosomal_L7Ae
ENSG00000100139	MICALL1	85377	MIRAB13|KIAA1668|MICAL-L1	MICAL like 1	Non-canonical_RBP
ENSG00000100142	POLR2F	5435	RPB6|HRBP14.4	RNA polymerase II subunit F	RNA_pol_Rpb6
ENSG00000100167	44442	55964	44442	septin 3	MMR_HSR1
ENSG00000100201	DDX17	10521	P72	DEAD-box helicase 17	DEAD
ENSG00000100207	TCF20	6942	AR1|SPBP	transcription factor 20	Non-canonical_RBP
ENSG00000100220	RTCB	51493	HSPC117|FAAP|C22orf28	RNA 2',3'-cyclic phosphate and 5'-OH ligase	RtcB
ENSG00000100226	GTPBP1	9567	GP-1|HSPC018	GTP binding protein 1	GTP_EFTU
ENSG00000100227	POLDIP3	84271	PDIP46|KIAA1649|SKAR|PDIP3	DNA polymerase delta interacting protein 3	RRM_1
ENSG00000100228	RAB36	9609	-	RAB36, member RAS oncogene family	MMR_HSR1
ENSG00000100241	SBF1	6305	MTMR5|DENND7A	SET binding factor 1	Non-canonical_RBP
ENSG00000100243	CYB5R3	1727	DIA1	cytochrome b5 reductase 3	Non-canonical_RBP
ENSG00000100280	AP1B1	162	BAM22|AP105A|ADTB1|CLAPB2	adaptor related protein complex 1 subunit beta 1	Non-canonical_RBP
ENSG00000100294	MCAT	27349	MT|MCT|fabD|FASN2C|NET62|MCT1	malonyl-CoA-acyl carrier protein transacylase	Non-canonical_RBP
ENSG00000100296	THOC5	8563	PK1.3|KIAA0983|Fmip|fSAP79|C22orf19	THO complex 5	Non-canonical_RBP
ENSG00000100297	MCM5	4174	CDC46	minichromosome maintenance complex component 5	Non-canonical_RBP
ENSG00000100298	APOBEC3H	164668	ARP10	apolipoprotein B mRNA editing enzyme catalytic subunit 3H	APOBEC_N
ENSG00000100304	TTLL12	23170	KIAA0153	tubulin tyrosine ligase like 12	Non-canonical_RBP
ENSG00000100316	RPL3	6122	L3	ribosomal protein L3	Ribosomal_L3
ENSG00000100319	ZMAT5	55954	SNRNP20|ZC3H19	zinc finger matrin-type 5	zf-CCCH
ENSG00000100320	RBFOX2	23543	HNRBP2|FOX-2|HRNBP2|RBM9	RNA binding fox-1 homolog 2	Fox-1_C
ENSG00000100325	ASCC2	84164	ASC1p100|FLJ21588|DKFZp586O0223	activating signal cointegrator 1 complex subunit 2	Non-canonical_RBP
ENSG00000100345	MYH9	4627	NMMHCA|NMHC-II-A|MHA|FTNS|EPSTS|DFNA17	myosin heavy chain 9	Non-canonical_RBP
ENSG00000100353	EIF3D	8664	eIF3-p66|eIF3-zeta|eIF3d|EIF3S7	eukaryotic translation initiation factor 3 subunit D	eIF-3_zeta
ENSG00000100354	TNRC6B	23112	KIAA1093	trinucleotide repeat containing adaptor 6B	Ago_hook
ENSG00000100401	RANGAP1	5905	Fug1|KIAA1835|SD	Ran GTPase activating protein 1	Non-canonical_RBP
ENSG00000100403	ZC3H7B	23264	RoXaN|FLJ13787|DKFZp434K0920|KIAA1031	zinc finger CCCH-type containing 7B	zf-CCCH
ENSG00000100410	PHF5A	84844	MGC1346|SF3b14b|INI|bK223H9.2|Rds3|SAP14b|SF3B7	PHD finger protein 5A	PHF5
ENSG00000100412	ACO2	50	ACONM	aconitase 2	Aconitase
ENSG00000100413	POLR3H	171568	RPC8|KIAA1665	RNA polymerase III subunit H	RNA_pol_Rbc25
ENSG00000100416	TRMU	55687	FLJ10140|MTO2|TRMT	tRNA 5-methylaminomethyl-2-thiouridylate methyltransferase	tRNA_Me_trans
ENSG00000100441	KHNYN	23351	KIAA0323	KH and NYN domain containing	RNase_Zc3h12a
ENSG00000100442	FKBP3	2287	FKBP-25|PPIase	FKBP prolyl isomerase 3	Non-canonical_RBP
ENSG00000100461	RBM23	55147	FLJ10482|CAPERbeta|RNPC4	RNA binding motif protein 23	RRM_1
ENSG00000100462	PRMT5	10419	SKB1Hs|HRMT1L5|SKB1	protein arginine methyltransferase 5	Non-canonical_RBP
ENSG00000100504	PYGL	5836	N	glycogen phosphorylase L	Non-canonical_RBP
ENSG00000100519	PSMC6	5706	p42	proteasome 26S subunit, ATPase 6	Non-canonical_RBP
ENSG00000100601	ALKBH1	8846	hABH|alkB|ABH|ALKBH	alkB homolog 1, histone H2A dioxygenase	hmm_2OG-FeII_Oxy_2
ENSG00000100603	SNW1	22938	NCoA-62|SKIP|Prp45|PRPF45|Bx42|SKIP1|FUN20|SKIIP	SNW domain containing 1	Non-canonical_RBP
ENSG00000100629	CEP128	145508	C14orf61|C14orf145	centrosomal protein 128	Non-canonical_RBP
ENSG00000100632	ERH	2079	DROER	ERH mRNA splicing and mitosis factor	Non-canonical_RBP
ENSG00000100650	SRSF5	6430	SRP40|HRS|SFRS5	serine and arginine rich splicing factor 5	RRM_1
ENSG00000100664	EIF5	1983	N	eukaryotic translation initiation factor 5	eIF-5_eIF-2B
ENSG00000100697	DICER1	23405	Dicer|KIAA0928|K12H4.8-LIKE|HERNA|MNG1	dicer 1, ribonuclease III	Ribonuclease_3
ENSG00000100714	MTHFD1	4522	MTHFC|MTHFD	methylenetetrahydrofolate dehydrogenase, cyclohydrolase and formyltetrahydrofolate synthetase 1	Non-canonical_RBP
ENSG00000100722	ZC3H14	79882	FLJ11806|UKp68|NY-REN-37	zinc finger CCCH-type containing 14	zf-CCCH_2
ENSG00000100726	TELO2	9894	KIAA0683|hCLK2|TEL2	telomere maintenance 2	Non-canonical_RBP
ENSG00000100764	PSMC1	5700	S4|p56	proteasome 26S subunit, ATPase 1	Non-canonical_RBP
ENSG00000100784	RPS6KA5	9252	MSK1|RLPK	ribosomal protein S6 kinase A5	RIO1
ENSG00000100813	ACIN1	22985	KIAA0670|fSAP152|ACINUS	apoptotic chromatin condensation inducer 1	SAP
ENSG00000100823	APEX1	328	APE|REF1|HAP1|APX|APEN|REF-1|APE-1|APEX	apurinic/apyrimidinic endodeoxyribonuclease 1	Exo_endo_phos
ENSG00000100836	PABPN1	8106	PAB2|OPMD|PABP2	poly(A) binding protein nuclear 1	RRM_1
ENSG00000100883	SRP54	6729	N	signal recognition particle 54	SRP54
ENSG00000100888	CHD8	57680	KIAA1564|DUPLIN|HELSNF1	chromodomain helicase DNA binding protein 8	BRK
ENSG00000100934	SEC23A	10484	N	Sec23 homolog A, coat complex II component	Non-canonical_RBP
ENSG00000100941	PNN	5411	memA	pinin, desmosome associated protein	Non-canonical_RBP
ENSG00000100994	PYGB	5834	N	glycogen phosphorylase B	Non-canonical_RBP
ENSG00000101040	ZMYND8	23613	RACK7|PRKCBP1	zinc finger MYND-type containing 8	Non-canonical_RBP
ENSG00000101104	PABPC1L	80336	dJ1069P2.3|PABPC1L1|ePAB|C20orf119	poly(A) binding protein cytoplasmic 1 like	RRM_1
ENSG00000101115	SALL4	57167	dJ1112F19.1|ZNF797	spalt like transcription factor 4	zf-C2H2
ENSG00000101126	ADNP	23394	KIAA0784|ADNP1	activity dependent neuroprotector homeobox	Non-canonical_RBP
ENSG00000101138	CSTF1	1477	N	cleavage stimulation factor subunit 1	Non-canonical_RBP
ENSG00000101161	PRPF6	24148	TOM|bB152O15.1|ANT-1|U5-102K|Prp6|hPrp6|SNRNP102|RP60|C20orf14	pre-mRNA processing factor 6	PRP1_N
ENSG00000101181	MTG2	26164	FLJ10741|dJ1005F21.2|ObgH1|GTPBP5	mitochondrial ribosome associated GTPase 2	MMR_HSR1
ENSG00000101182	PSMA7	5688	XAPC7|C6|HSPC|RC6-1	proteasome subunit alpha 7	Non-canonical_RBP
ENSG00000101191	DIDO1	11083	DIO1|dJ885L7.8|FLJ11265|KIAA0333|DIO-1|BYE1|C20orf158|DATF1	death inducer-obliterator 1	Non-canonical_RBP
ENSG00000101210	EEF1A2	1917	EEF1AL|HS1|STNL|STN	eukaryotic translation elongation factor 1 alpha 2	GTP_EFTU
ENSG00000101246	ARFRP1	10139	ARP|Arp1|ARL18	ADP ribosylation factor related protein 1	MMR_HSR1
ENSG00000101247	NDUFAF5	79133	dJ842G6.1|C20orf7	NADH:ubiquinone oxidoreductase complex assembly factor 5	Methyltransf_31
ENSG00000101310	SEC23B	10483	CDA-II|CDAII|HEMPAS|CDAN2	Sec23 homolog B, coat complex II component	Non-canonical_RBP
ENSG00000101343	CRNKL1	51340	CRN|CLF|SYF3|Clf1	crooked neck pre-mRNA splicing factor 1	HAT
ENSG00000101347	SAMHD1	25939	SBBI88|Mg11|HDDC1|MOP-5|AGS5	SAM and HD domain containing deoxynucleoside triphosphate triphosphohydrolase 1	Non-canonical_RBP
ENSG00000101361	NOP56	10528	SCA36|NOL5A	NOP56 ribonucleoprotein	Nop
ENSG00000101367	MAPRE1	22919	EB1	microtubule associated protein RP/EB family member 1	Non-canonical_RBP
ENSG00000101444	AHCY	191	SAHH	adenosylhomocysteinase	Non-canonical_RBP
ENSG00000101447	FAM83D	81610	dJ616B8.3|CHICA|C20orf129	family with sequence similarity 83 member D	FAM83
ENSG00000101452	DHX35	60625	FLJ22759|KAIA0875|C20orf15|DDX35	DEAH-box helicase 35	HA2
ENSG00000101489	CELF4	56853	BRUNOL4	CUGBP Elav-like family member 4	RRM_1
ENSG00000101546	RBFA	79863	FLJ21172|HsT169|C18orf22	ribosome binding factor A	Non-canonical_RBP
ENSG00000101557	USP14	9097	TGT	ubiquitin specific peptidase 14	Non-canonical_RBP
ENSG00000101558	VAPA	9218	hVAP-33|VAP-A	VAMP associated protein A	Non-canonical_RBP
ENSG00000101574	METTL4	64863	FLJ23017|HsT661	methyltransferase like 4	MT-A70
ENSG00000101596	SMCHD1	23347	KIAA0650|FSHD2	structural maintenance of chromosomes flexible hinge domain containing 1	Non-canonical_RBP
ENSG00000101654	RNMT	8731	RG7MT1	RNA guanine-7 methyltransferase	Pox_MCEL
ENSG00000101752	MIB1	57534	DIP-1|MIB|KIAA1323|ZZANK2|ZZZ6	mindbomb E3 ubiquitin protein ligase 1	Non-canonical_RBP
ENSG00000101782	RIOK3	8780	SUDD	RIO kinase 3	RIO1
ENSG00000101811	CSTF2	1478	CstF-64	cleavage stimulation factor subunit 2	RRM_1
ENSG00000101868	POLA1	5422	p180|POLA|NSX	DNA polymerase alpha 1, catalytic subunit	Non-canonical_RBP
ENSG00000101882	NKAP	79576	FLJ22626	NFKB activating protein	Non-canonical_RBP
ENSG00000101888	NXT2	55916	P15-2	nuclear transport factor 2 like export factor 2	NTF2
ENSG00000101898	MCTS2P	100101490	psiMCT-1|MCTS2	MCTS family member 2, pseudogene	PUA
ENSG00000101972	STAG2	10735	SA-2|SCC3B|SA2	stromal antigen 2	Non-canonical_RBP
ENSG00000102024	PLS3	5358	T-plastin	plastin 3	Non-canonical_RBP
ENSG00000102038	SMARCA1	6594	SNF2LB|NURF140|ISWI|SWI|hSNF2L|SNF2L1|SNF2L	SWI/SNF related, matrix associated, actin dependent regulator of chromatin, subfamily a, member 1	ResIII
ENSG00000102053	ZC3H12B	340554	MCPIP2|CXorf32	zinc finger CCCH-type containing 12B	RNase_Zc3h12a
ENSG00000102054	RBBP7	5931	RbAp46	RB binding protein 7, chromatin remodeling factor	Non-canonical_RBP
ENSG00000102081	FMR1	2332	FMRP|FRAXA|MGC87458|POF1|POF	fragile X mental retardation 1	FXMRP1_C_core
ENSG00000102109	PCSK1N	27344	SAAS|SgVIII|SCG8|proSAAS|PEN|BigLEN	proprotein convertase subtilisin/kexin type 1 inhibitor	ProSAAS
ENSG00000102119	EMD	2010	STA|LEMD5	emerin	Non-canonical_RBP
ENSG00000102144	PGK1	5230	N	phosphoglycerate kinase 1	Non-canonical_RBP
ENSG00000102189	EEA1	8411	ZFYVE2	early endosome antigen 1	Non-canonical_RBP
ENSG00000102241	HTATSF1	27336	TAT-SF1	HIV-1 Tat specific factor 1	RRM_1
ENSG00000102309	PIN4	5303	PAR14|PAR17|EPVH	peptidylprolyl cis/trans isomerase, NIMA-interacting 4	Non-canonical_RBP
ENSG00000102316	MAGED2	10916	JCL-1|BCG1|11B6|MAGE-D2|HCA10|MAGED|MGC8386	MAGE family member D2	Non-canonical_RBP
ENSG00000102317	RBM3	5935	IS1-RNPL	RNA binding motif protein 3	RRM_1
ENSG00000102531	FNDC3A	22862	bA203I16.5|KIAA0970|FNDC3	fibronectin type III domain containing 3A	Non-canonical_RBP
ENSG00000102699	PARP4	143	VAULT3|p193|VPARP|VWA5C|ADPRTL1	poly(ADP-ribose) polymerase family member 4	PARP
ENSG00000102738	MRPS31	10240	IMOGN38	mitochondrial ribosomal protein S31	MRP-S31
ENSG00000102753	KPNA3	3839	SRP1gamma|SRP4|hSRP1|IPOA4	karyopherin subunit alpha 3	Non-canonical_RBP
ENSG00000102786	INTS6	26512	DICE1|HDB|Notchl2|DBI-1|DDX26A|INT6|DDX26	integrator complex subunit 6	INT_SG_DDX_CT_C
ENSG00000102898	NUTF2	10204	NTF2|PP15	nuclear transport factor 2	NTF2
ENSG00000102900	NUP93	9688	KIAA0095	nucleoporin 93	Non-canonical_RBP
ENSG00000102921	N4BP1	9683	N	NEDD4 binding protein 1	RNase_Zc3h12a
ENSG00000102935	ZNF423	23090	KIAA0760|OAZ|hOAZ|Ebfaz|Zfp104|NPHP14|JBTS19	zinc finger protein 423	zf-C2H2
ENSG00000102974	CTCF	10664	N	CCCTC-binding factor	Non-canonical_RBP
ENSG00000102977	ACD	65057	Ptop|Pip1|Tpp1|Tint1	ACD shelterin complex subunit and telomerase recruitment factor	TPP1
ENSG00000102978	POLR2C	5432	RPB3	RNA polymerase II subunit C	RNA_pol_A_bac
ENSG00000103005	USB1	79650	FLJ13154|HVSL1|Mpn1|C16orf57	U6 snRNA biogenesis phosphodiesterase 1	HVSL
ENSG00000103035	PSMD7	5713	S12|P40|MOV34|Rpn8	proteasome 26S subunit, non-ATPase 7	Non-canonical_RBP
ENSG00000103067	ESRP2	80004	FLJ21918|RBM35B	epithelial splicing regulatory protein 2	Non-canonical_RBP
ENSG00000103152	MPG	4350	MDG	N-methylpurine DNA glycosylase	Non-canonical_RBP
ENSG00000103197	TSC2	7249	tuberin|LAM|PPP1R160|TSC4	TSC complex subunit 2	Non-canonical_RBP
ENSG00000103222	ABCC1	4363	GS-X|MRP|MRP1	ATP binding cassette subfamily C member 1	Non-canonical_RBP
ENSG00000103248	MTHFSD	64779	FLJ12998	methenyltetrahydrofolate synthetase domain containing	RRM_1
ENSG00000103253	HAGHL	84264	MGC2605	hydroxyacylglutathione hydrolase like	Lactamase_B
ENSG00000103326	CAPN15	6650	SOLH	calpain 15	zf-RanBP
ENSG00000103335	PIEZO1	9780	KIAA0233|FAM38A	piezo type mechanosensitive ion channel component 1	Non-canonical_RBP
ENSG00000103342	GSPT1	2935	GST1|ETF3A|eRF3a	G1 to S phase transition 1	GTP_EFTU
ENSG00000103356	EARS2	124454	KIAA1970|MSE1	glutamyl-tRNA synthetase 2, mitochondrial	tRNA-synt_1c
ENSG00000103449	SALL1	6299	Hsal1|ZNF794|TBS	spalt like transcription factor 1	zf-C2H2
ENSG00000103495	MAZ	4150	ZF87|Pur-1|Zif87|ZNF801	MYC associated zinc finger protein	zf-C2H2
ENSG00000103510	KAT8	84148	MOF|FLJ14040|hMOF|ZC2HC8|MYST1	lysine acetyltransferase 8	Tudor-knot
ENSG00000103512	NOMO1	23420	PM5	NODAL modulator 1	Non-canonical_RBP
ENSG00000103549	RNF40	9810	KIAA0661|RBP95|BRE1B|STARING	ring finger protein 40	Non-canonical_RBP
ENSG00000103550	KNOP1	400506	101F10.1|FAM191A|TSG118|C16orf88	lysine rich nucleolar protein 1	Non-canonical_RBP
ENSG00000103657	HERC1	8925	p532|p619	HECT and RLD domain containing E3 ubiquitin protein ligase family member 1	Non-canonical_RBP
ENSG00000103671	TRIP4	9325	HsT17391|ZC2HC5|ASC-1	thyroid hormone receptor interactor 4	ASCH
ENSG00000103769	RAB11A	8766	YL8	RAB11A, member RAS oncogene family	MMR_HSR1
ENSG00000103932	RPAP1	26015	DKFZP727M111|KIAA1403|MGC858|FLJ12732	RNA polymerase II associated protein 1	Non-canonical_RBP
ENSG00000103966	EHD4	30844	PAST4	EH domain containing 4	MMR_HSR1
ENSG00000103994	ZNF106	64397	ZNF474|SH3BP3|ZFP106	zinc finger protein 106	Non-canonical_RBP
ENSG00000104067	TJP1	7082	ZO-1|MGC133289|DKFZp686M05161	tight junction protein 1	Non-canonical_RBP
ENSG00000104129	DNAJC17	55192	FLJ10634	DnaJ heat shock protein family (Hsp40) member C17	RRM_1
ENSG00000104131	EIF3J	8669	eIF3-p35|eIF3-alpha|eIF3j|EIF3S1	eukaryotic translation initiation factor 3 subunit J	eIF3_subunit
ENSG00000104177	MYEF2	50804	MEF-2|FLJ11213|KIAA1341|HsT18564	myelin expression factor 2	RRM_1
ENSG00000104299	INTS9	55756	FLJ10871|CPSF2L|RC-74	integrator complex subunit 9	Beta-Casp
ENSG00000104356	POP1	10940	N	POP1 homolog, ribonuclease P/MRP subunit	POP1
ENSG00000104388	RAB2A	5862	RAB2	RAB2A, member RAS oncogene family	MMR_HSR1
ENSG00000104408	EIF3E	3646	eIF3-p48|eIF3e|INT6|EIF3S6	eukaryotic translation initiation factor 3 subunit E	eIF3_N
ENSG00000104517	UBR5	51366	DD5|HYD|EDD|KIAA0896|EDD1	ubiquitin protein ligase E3 component n-recognin 5	PABP
ENSG00000104529	EEF1D	1936	EF-1D|FLJ20897	eukaryotic translation elongation factor 1 delta	EF1_GNE
ENSG00000104626	ERI1	90459	3'HEXO|THEX1	exoribonuclease 1	RNase_T
ENSG00000104679	R3HCC1	203069	DKFZp564N123	R3H domain and coiled-coil containing 1	R3H
ENSG00000104687	GSR	2936	N	glutathione-disulfide reductase	Non-canonical_RBP
ENSG00000104691	UBXN8	7993	D8S2298E|REP8|UBXD6	UBX domain protein 8	RNase_H
ENSG00000104738	MCM4	4173	CDC54|hCdc21|P1-Cdc21|MGC33310|CDC21	minichromosome maintenance complex component 4	Non-canonical_RBP
ENSG00000104783	KCNN4	3783	KCa3.1|hSK4|hKCa4|hIKCa1|IK	potassium calcium-activated channel subfamily N member 4	Non-canonical_RBP
ENSG00000104824	HNRNPL	3191	HNRPL	heterogeneous nuclear ribonucleoprotein L	RRM_5
ENSG00000104835	SARS2	54938	FLJ20450|mtSerRS|SerRSmt|SARS|SERS|SYS|SARSM	seryl-tRNA synthetase 2, mitochondrial	tRNA-synt_2b
ENSG00000104852	SNRNP70	6625	U1-70K|Snp1|RNPU1Z|RPU1|SNRP70	small nuclear ribonucleoprotein U1 subunit 70	U1snRNP70_N
ENSG00000104859	CLASRP	11129	SWAP2|CLASP|SFRS16	CLK4 associating serine/arginine rich protein	DRY_EERY
ENSG00000104872	PIH1D1	55011	FLJ20643|Pih1|NOP17	PIH1 domain containing 1	PIH1
ENSG00000104881	PPP1R13L	10848	RAI|IASPP	protein phosphatase 1 regulatory subunit 13 like	Non-canonical_RBP
ENSG00000104884	ERCC2	2068	MAG|EM9|MGC102762|MGC126218|MGC126219|TFIIH|XPD	ERCC excision repair 2, TFIIH core complex helicase subunit	ResIII
ENSG00000104889	RNASEH2A	10535	RNASEHI|RNHIA|RNHL|AGS4	ribonuclease H2 subunit A	RNase_HII
ENSG00000104897	SF3A2	8175	SF3a66|SAP62|PRPF11|Prp11	splicing factor 3a subunit 2	zf-met
ENSG00000104907	TRMT1	55621	FLJ20244|TRM1	tRNA methyltransferase 1	TRM
ENSG00000104967	NOVA2	4858	ANOVA|NOVA3	NOVA alternative splicing regulator 2	KH_1
ENSG00000104976	SNAPC2	6618	SNAP45|PTFdelta	small nuclear RNA activating complex polypeptide 2	SnAPC_2_like
ENSG00000105063	PPP6R1	22870	SAP190|KIAA1115|SAPS1	protein phosphatase 6 regulatory subunit 1	Non-canonical_RBP
ENSG00000105127	AKAP8	10270	AKAP95|DKFZp586B1222	A-kinase anchoring protein 8	AKAP95
ENSG00000105141	CASP14	23581	MICE|MGC119078|MGC119079	caspase 14	Non-canonical_RBP
ENSG00000105171	POP4	10775	RPP29	POP4 homolog, ribonuclease P/MRP subunit	UPF0086
ENSG00000105193	RPS16	6217	S16	ribosomal protein S16	Ribosomal_S9
ENSG00000105202	FBL	2091	RNU3IP1|FLRN|FIB|Nop1	fibrillarin	Fibrillarin
ENSG00000105220	GPI	2821	AMF|NLK	glucose-6-phosphate isomerase	Non-canonical_RBP
ENSG00000105258	POLR2I	5438	RPB9|hRPB14.5	RNA polymerase II subunit I	RNA_POL_M_15KD
ENSG00000105278	ZFR2	23217	KIAA1086	zinc finger RNA binding protein 2	DZF
ENSG00000105298	CACTIN	58509	NY-REN-24|fSAPc|cactin|C19orf29	cactin, spliceosome C complex subunit	Non-canonical_RBP
ENSG00000105321	CCDC9	26093	DKFZP586M1019	coiled-coil domain containing 9	Non-canonical_RBP
ENSG00000105323	HNRNPUL1	11100	E1B-AP5|E1BAP5|FLJ12944|HNRPUL1	heterogeneous nuclear ribonucleoprotein U like 1	SAP
ENSG00000105355	PLIN3	10226	TIP47|PP17|M6PRBP1	perilipin 3	Non-canonical_RBP
ENSG00000105364	MRPL4	51073	CGI-28	mitochondrial ribosomal protein L4	Ribosomal_L4
ENSG00000105372	RPS19	6223	DBA|S19|eS19	ribosomal protein S19	Ribosomal_S19e
ENSG00000105373	NOP53	29997	PICT-1|PICT1|GLTSCR2	NOP53 ribosome biogenesis factor	Nop53
ENSG00000105401	CDC37	11140	P50CDC37	cell division cycle 37	Non-canonical_RBP
ENSG00000105447	GRWD1	83743	WDR28|GRWD|RRB1	glutamate rich WD repeat containing 1	Non-canonical_RBP
ENSG00000105486	LIG1	3978	N	DNA ligase 1	Non-canonical_RBP
ENSG00000105523	FAM83E	54854	FLJ20200	family with sequence similarity 83 member E	FAM83
ENSG00000105568	PPP2R1A	5518	PR65A|PP2A-Aalpha|PP2AA	protein phosphatase 2 scaffold subunit Aalpha	Non-canonical_RBP
ENSG00000105576	TNPO2	30000	IPO3|KPNB2B|FLJ12155|TRN2	transportin 2	IBN_N
ENSG00000105618	PRPF31	26121	NY-BR-99|PRP31|hPrp31|SNRNP61|RP11	pre-mRNA processing factor 31	Nop
ENSG00000105640	RPL18A	6142	L18A	ribosomal protein L18a	Ribosomal_L18A
ENSG00000105671	DDX49	54555	FLJ10432|Dbp8	DEAD-box helicase 49	DEAD
ENSG00000105705	SUGP1	57794	F23858|DKFZp434E2216|RBP|SF4	SURP and G-patch domain containing 1	Surp
ENSG00000105726	ATP13A1	57130	KIAA1825|FLJ31858|CGI-152|ATP13A	ATPase 13A1	Non-canonical_RBP
ENSG00000105732	ZNF574	64763	FLJ22059	zinc finger protein 574	zf-C2H2
ENSG00000105755	ETHE1	23474	YF13H12|HSCO	ETHE1 persulfide dioxygenase	Lactamase_B
ENSG00000105793	GTPBP10	85865	DKFZP686A10121|FLJ38242|OBGH2	GTP binding protein 10	MMR_HSR1
ENSG00000105821	DNAJC2	27000	MPP11|MPHOSPH11|ZUO1|zuotin|ZRF1	DnaJ heat shock protein family (Hsp40) member C2	Non-canonical_RBP
ENSG00000105849	TWISTNB	221830	N	TWIST neighbor	SHS2_Rpb7-N
ENSG00000105856	HBP1	26959	-	HMG-box transcription factor 1	AXH
ENSG00000105865	DUS4L	11062	PP35|DUS4	dihydrouridine synthase 4 like	Dus
ENSG00000105939	ZC3HAV1	56829	ZAP|FLB6421|FLJ13288|MGC48898|ZC3HDC2|ZC3H2|PARP13	zinc finger CCCH-type containing, antiviral 1	PARP
ENSG00000105953	OGDH	4967	E1k	oxoglutarate dehydrogenase	Non-canonical_RBP
ENSG00000105968	H2AFV	94239	MGC10170|MGC10831|MGC1947|H2AV	H2A histone family member V	Non-canonical_RBP
ENSG00000106009	BRAT1	221927	MGC22916|C7orf27|BAAT1	BRCA1 associated ATM activator 1	Non-canonical_RBP
ENSG00000106028	SSBP1	6742	SSBP|mtSSB	single stranded DNA binding protein 1	Non-canonical_RBP
ENSG00000106105	GARS	2617	GlyRS|DSMAV|SMAD1|CMT2D	glycyl-tRNA synthetase	HGTP_anticodon
ENSG00000106211	HSPB1	3315	HSP27|HSP28|Hs.76067|Hsp25|CMT2F	heat shock protein family B (small) member 1	Non-canonical_RBP
ENSG00000106244	PDAP1	11333	PAP1|PAP|HASPP28	PDGFA associated protein 1	Non-canonical_RBP
ENSG00000106246	PTCD1	26024	KIAA0632	pentatricopeptide repeat domain 1	PPR
ENSG00000106263	EIF3B	8662	PRT1|eIF3b|EIF3S9	eukaryotic translation initiation factor 3 subunit B	eIF2A
ENSG00000106305	AIMP2	7965	p38|PRO0992|JTV-1|JTV1	aminoacyl tRNA synthetase complex interacting multifunctional protein 2	Non-canonical_RBP
ENSG00000106344	RBM28	55131	FLJ10377	RNA binding motif protein 28	RRM_1
ENSG00000106355	LSM5	23658	YER146W	LSM5 homolog, U6 small nuclear RNA and mRNA degradation associated	LSM
ENSG00000106397	PLOD3	8985	LH3	procollagen-lysine,2-oxoglutarate 5-dioxygenase 3	hmm_2OG-FeII_Oxy
ENSG00000106443	PHF14	9678	KIAA0783	PHD finger protein 14	Non-canonical_RBP
ENSG00000106560	GIMAP2	26157	DKFZp586D0824|HIMAP2|IMAP2|IAN12	GTPase, IMAP family member 2	MMR_HSR1
ENSG00000106591	MRPL32	64983	HSPC283|L32mt|MRP-L32|bMRP-59b	mitochondrial ribosomal protein L32	Ribosomal_L32p
ENSG00000106615	RHEB	6009	RHEB2	Ras homolog, mTORC1 binding	MMR_HSR1
ENSG00000106628	POLD2	5425	N	DNA polymerase delta 2, accessory subunit	Non-canonical_RBP
ENSG00000106638	TBL2	26608	WS-betaTRP|WBSCR13|DKFZP43N024	transducin beta like 2	Non-canonical_RBP
ENSG00000106682	EIF4H	7458	WSCR1|KIAA0038|WBSCR1	eukaryotic translation initiation factor 4H	RRM_1
ENSG00000106803	SEC61B	10952	N	Sec61 translocon beta subunit	Non-canonical_RBP
ENSG00000107105	ELAVL2	1993	HuB|HEL-N1	ELAV like RNA binding protein 2	RRM_1
ENSG00000107164	FUBP3	8939	FBP3	far upstream element binding protein 3	KH_1
ENSG00000107201	DDX58	23586	RIG-I|FLJ13599|DKFZp434J1111|RIG-1|RIG1	DExD/H-box helicase 58	RIG-I_C-RD
ENSG00000107223	EDF1	8721	EDF-1|CFAP280	endothelial differentiation related factor 1	Non-canonical_RBP
ENSG00000107290	SETX	23064	KIAA0625|AOA2|Sen1|ALS4|SCAR1	senataxin	UvrD-helicase
ENSG00000107438	PDLIM1	9124	CLP-36|hCLIM1|CLP36|CLIM1	PDZ and LIM domain 1	Non-canonical_RBP
ENSG00000107554	DNMBP	23268	KIAA1010|Tuba|ARHGEF36	dynamin binding protein	Non-canonical_RBP
ENSG00000107581	EIF3A	8661	eIF3-theta|eIF3-p170|KIAA0139|eIF3a|TIF32|EIF3|EIF3S10	eukaryotic translation initiation factor 3 subunit A	Non-canonical_RBP
ENSG00000107625	DDX50	79009	GU2|MGC3199|GUB|RH-II/GuB	DExD-box helicase 50	DEAD
ENSG00000107651	SEC23IP	11196	p125	SEC23 interacting protein	Non-canonical_RBP
ENSG00000107833	NPM3	10360	N	nucleophosmin/nucleoplasmin 3	Nucleoplasmin
ENSG00000107854	TNKS2	80351	TNKL|TANK2|PARP-5b|PARP-5c|PARP5B|PARP5C|pART6	tankyrase 2	PARP
ENSG00000107862	GBF1	8729	KIAA0248|ARF1GEF	golgi brefeldin A resistant guanine nucleotide exchange factor 1	Non-canonical_RBP
ENSG00000107864	CPEB3	22849	KIAA0940	cytoplasmic polyadenylation element binding protein 3	RRM_1
ENSG00000107929	LARP4B	23185	KIAA0217|LARP5	La ribonucleoprotein domain family member 4B	La
ENSG00000107937	GTPBP4	23560	CRFG|NGB|FLJ10690|FLJ10686|NOG1	GTP binding protein 4	NOG1
ENSG00000107949	BCCIP	56647	BCCIPalpha|TOK-1	BRCA2 and CDKN1A interacting protein	Non-canonical_RBP
ENSG00000107951	MTPAP	55149	FLJ10486|mtPAP|SPAX4|TENT6|PAPD1	mitochondrial poly(A) polymerase	PAP_assoc
ENSG00000107959	PITRM1	10531	MP1|KIAA1104|hMP1|PreP	pitrilysin metallopeptidase 1	Non-canonical_RBP
ENSG00000107960	STN1	79991	FLJ22559|bA541N10.2|OBFC1	STN1 subunit of CST complex	tRNA_anti-codon
ENSG00000108010	GLRX3	10539	PICOT|bA500G10.4|GRX3|GLRX4|GRX4|TXNL2	glutaredoxin 3	Non-canonical_RBP
ENSG00000108055	SMC3	9126	HCAP|BAM|SMC3L1|bamacan|CSPG6	structural maintenance of chromosomes 3	Non-canonical_RBP
ENSG00000108064	TFAM	7019	TCF6|TCF6L2	transcription factor A, mitochondrial	Non-canonical_RBP
ENSG00000108107	RPL28	6158	FLJ43307|L28	ribosomal protein L28	Ribosomal_L28e
ENSG00000108256	NUFIP2	57532	KIAA1321|MGC117262|PIG1|182-FIP|FIP-82|82-FIP	nuclear FMR1 interacting protein 2	NUFIP2
ENSG00000108298	RPL19	6143	FLJ27452|MGC71997|DKFZp779D216|L19	ribosomal protein L19	Ribosomal_L19e
ENSG00000108312	UBTF	7343	UBF|NOR-90|UBF1|UBF2	upstream binding transcription factor	Non-canonical_RBP
ENSG00000108344	PSMD3	5709	S3|P58|Rpn3|TSTA2	proteasome 26S subunit, non-ATPase 3	Non-canonical_RBP
ENSG00000108349	CASC3	22794	MLN51|BTZ	CASC3 exon junction complex subunit	Btz
ENSG00000108387	44443	5414	H5|CE5B3|hucep-7|ARTS|hCDCREL-2|MART|FLJ40121|PNUTL2|C17orf47	septin 4	MMR_HSR1
ENSG00000108406	DHX40	79665	ARG147|PAD|FLJ22060|DDX40	DEAH-box helicase 40	HA2
ENSG00000108424	KPNB1	3837	NTF97|IPOB|MGC2155|MGC2156|MGC2157|IMB1|Impnb|IPO1	karyopherin subunit beta 1	IBN_N
ENSG00000108469	RECQL5	9400	RecQ5|FLJ90603	RecQ like helicase 5	DEAD
ENSG00000108506	INTS2	57508	INT2|KIAA1287	integrator complex subunit 2	INTS2
ENSG00000108518	PFN1	5216	N	profilin 1	Non-canonical_RBP
ENSG00000108528	SLC25A11	8402	OGC|SLC20A4	solute carrier family 25 member 11	Non-canonical_RBP
ENSG00000108559	NUP88	4927	MGC8530	nucleoporin 88	Non-canonical_RBP
ENSG00000108588	CCDC47	57003	GK001	coiled-coil domain containing 47	Non-canonical_RBP
ENSG00000108591	DRG2	1819	N	developmentally regulated GTP binding protein 2	MMR_HSR1
ENSG00000108592	FTSJ3	117246	SPB1	FtsJ RNA 2'-O-methyltransferase 3	FtsJ
ENSG00000108651	UTP6	55813	HCA66|C17orf40	UTP6 small subunit processome component	U3_assoc_6
ENSG00000108654	DDX5	1655	p68|HLR1|G17P1	DEAD-box helicase 5	DEAD
ENSG00000108671	PSMD11	5717	S9|p44.5|MGC3844|Rpn6	proteasome 26S subunit, non-ATPase 11	Non-canonical_RBP
ENSG00000108684	ASIC2	40	ASIC2a|BNC1|BNaC1|hBNaC1|MDEG|ACCN|ACCN1	acid sensing ion channel subunit 2	Non-canonical_RBP
ENSG00000108771	DHX58	79132	LGP2|D11LGP2	DExH-box helicase 58	RIG-I_C-RD
ENSG00000108774	RAB5C	5878	RAB5CL|RABL	RAB5C, member RAS oncogene family	MMR_HSR1
ENSG00000108825	PTGES3L-AARSD1	100885850	N	PTGES3L-AARSD1 readthrough	tRNA_SAD
ENSG00000108826	MRPL27	51264	N	mitochondrial ribosomal protein L27	Ribosomal_L27
ENSG00000108829	LRRC59	55379	PRO1855|FLJ21675	leucine rich repeat containing 59	Non-canonical_RBP
ENSG00000108848	LUC7L3	51747	LUC7A|CROP|OA48-18|CREAP-1|FLJ11063|CRA|hLuc7A	LUC7 like 3 pre-mRNA splicing factor	LUC7
ENSG00000108883	EFTUD2	9343	U5-116KD|Snrp116|Snu114|SNRNP116	elongation factor Tu GTP binding domain containing 2	GTP_EFTU
ENSG00000108953	YWHAE	7531	FLJ45465	tyrosine 3-monooxygenase/tryptophan 5-monooxygenase activation protein epsilon	Non-canonical_RBP
ENSG00000109062	SLC9A3R1	9368	NHERF|EBP50|NHERF1	SLC9A3 regulator 1	Non-canonical_RBP
ENSG00000109107	ALDOC	230	N	aldolase, fructose-bisphosphate C	Non-canonical_RBP
ENSG00000109111	SUPT6H	6830	KIAA0162|SPT6H	SPT6 homolog, histone chaperone and transcription elongation factor	S1
ENSG00000109113	RAB34	83871	RAB39|RAH|NARR	RAB34, member RAS oncogene family	MMR_HSR1
ENSG00000109171	SLAIN2	57606	FLJ21611|KIAA1458	SLAIN motif family member 2	Non-canonical_RBP
ENSG00000109339	MAPK10	5602	JNK3|p493F12|p54bSAPK|PRKM10	mitogen-activated protein kinase 10	RIO1
ENSG00000109475	RPL34	6164	L34	ribosomal protein L34	Ribosomal_L34e
ENSG00000109534	GAR1	54433	NOLA1	GAR1 ribonucleoprotein	Gar1
ENSG00000109536	FRG1	2483	FSG1|FRG1A	FSHD region gene 1	FRG1
ENSG00000109606	DHX15	1665	HRH2|DBP1|PRP43|PrPp43p|PRPF43|DDX15	DEAH-box helicase 15	HA2
ENSG00000109674	NEIL3	55247	FLJ10858|hFPG2|FPG2|hNEI3|ZGRF3	nei like DNA glycosylase 3	zf-RanBP
ENSG00000109805	NCAPG	64151	FLJ12450|hCAP-G|CAP-G|YCG1	non-SMC condensin I complex subunit G	Non-canonical_RBP
ENSG00000109814	UGDH	7358	N	UDP-glucose 6-dehydrogenase	Non-canonical_RBP
ENSG00000109819	PPARGC1A	10891	PGC1|PGC1A|PGC-1alpha|PPARGC1	PPARG coactivator 1 alpha	RRM_1
ENSG00000109832	DDX25	29118	GRTH	DEAD-box helicase 25	DEAD
ENSG00000109906	ZBTB16	7704	PLZF|ZNF145	zinc finger and BTB domain containing 16	zf-C2H2
ENSG00000109919	MTCH2	23788	SLC25A50	mitochondrial carrier 2	Non-canonical_RBP
ENSG00000109971	HSPA8	3312	HSC71|HSC70|HSP73|HSPA10	heat shock protein family A (Hsp70) member 8	Non-canonical_RBP
ENSG00000110047	EHD1	10938	H-PAST|HPAST1|FLJ42622|FLJ44618|PAST1	EH domain containing 1	MMR_HSR1
ENSG00000110060	PUS3	83480	FKSG32	pseudouridine synthase 3	PseudoU_synth_1
ENSG00000110063	DCPS	28960	HSPC015|HINT-5|HSL1	decapping enzyme, scavenger	DcpS_C
ENSG00000110075	PPP6R3	55291	SAPLa|DKFZp781E2374|DKFZp781O2362|DKFZp781E17107|SAP190|SAPL|PP6R3|FLJ11058|FLJ43065|KIAA1558|MGC125711|MGC125712|C11orf23|SAPS3	protein phosphatase 6 regulatory subunit 3	Non-canonical_RBP
ENSG00000110104	CCDC86	79080	MGC2574	coiled-coil domain containing 86	Cgr1
ENSG00000110107	PRPF19	27339	UBOX4|NMP200|PSO4|hPSO4|SNEV|PRP19	pre-mRNA processing factor 19	Prp19
ENSG00000110172	CHORDC1	26973	CHP1|CHP-1	cysteine and histidine rich domain containing 1	Non-canonical_RBP
ENSG00000110321	EIF4G2	1982	DAP5|NAT1|p97	eukaryotic translation initiation factor 4 gamma 2	MIF4G
ENSG00000110367	DDX6	1656	RCK|HLR2	DEAD-box helicase 6	DEAD
ENSG00000110619	CARS	833	CARS1	cysteinyl-tRNA synthetase	tRNA-synt_1e
ENSG00000110696	C11orf58	10944	SMAP	chromosome 11 open reading frame 58	Non-canonical_RBP
ENSG00000110700	RPS13	6207	S13	ribosomal protein S13	Ribosomal_S13_N
ENSG00000110713	NUP98	4928	NUP96	nucleoporin 98	Non-canonical_RBP
ENSG00000110801	PSMD9	5715	p27|Rpn4	proteasome 26S subunit, non-ATPase 9	Non-canonical_RBP
ENSG00000110851	PRDM4	11108	PFM1	PR/SET domain 4	zf-C2H2
ENSG00000110871	COQ5	84274	MGC4767	coenzyme Q5, methyltransferase	Methyltransf_31
ENSG00000110880	CORO1C	23603	coronin-3|HCRNN4	coronin 1C	Non-canonical_RBP
ENSG00000110888	CAPRIN2	65981	EEG1|FLJ22569|FLJ11391|caprin-2|RNG140|C1QDC1	caprin family member 2	Caprin-1_C
ENSG00000110917	MLEC	9761	KIAA0152	malectin	Non-canonical_RBP
ENSG00000110955	ATP5F1B	506	ATPSB|ATP5B	ATP synthase F1 subunit beta	Non-canonical_RBP
ENSG00000111011	RSRC2	65117	FLJ11021	arginine and serine rich coiled-coil 2	Non-canonical_RBP
ENSG00000111057	KRT18	3875	N	keratin 18	Non-canonical_RBP
ENSG00000111142	METAP2	10988	MNPEP|p67|MAP2	methionyl aminopeptidase 2	Non-canonical_RBP
ENSG00000111144	LTA4H	4048	N	leukotriene A4 hydrolase	Non-canonical_RBP
ENSG00000111196	MAGOHB	55110	FLJ10292|MGN2	mago homolog B, exon junction complex subunit	Mago_nashi
ENSG00000111224	PARP11	57097	C12orf6	poly(ADP-ribose) polymerase family member 11	PARP
ENSG00000111331	OAS3	4940	N	2'-5'-oligoadenylate synthetase 3	OAS1_C
ENSG00000111335	OAS2	4939	N	2'-5'-oligoadenylate synthetase 2	OAS1_C
ENSG00000111361	EIF2B1	1967	EIF-2Balpha|EIF-2B|EIF2BA|EIF2B	eukaryotic translation initiation factor 2B subunit alpha	IF-2B
ENSG00000111364	DDX55	57696	KIAA1595	DEAD-box helicase 55	DEAD
ENSG00000111405	ENDOU	8909	PP11|P11|PRSS26	endonuclease, poly(U) specific	XendoU
ENSG00000111530	CAND1	55832	TIP120A|DKFZp434M1414|KIAA0829|TIP120	cullin associated and neddylation dissociated 1	Non-canonical_RBP
ENSG00000111540	RAB5B	5869	-	RAB5B, member RAS oncogene family	MMR_HSR1
ENSG00000111581	NUP107	57122	NUP84	nucleoporin 107	Non-canonical_RBP
ENSG00000111596	CNOT2	4848	CDC36|NOT2H|NOT2	CCR4-NOT transcription complex subunit 2	NOT2_3_5
ENSG00000111602	TIMELESS	8914	hTIM|TIM|TIM1	timeless circadian regulator	Non-canonical_RBP
ENSG00000111605	CPSF6	11052	CFIM|HPBRII-4|HPBRII-7|CFIM68|CFIM72	cleavage and polyadenylation specific factor 6	RRM_1
ENSG00000111615	KRR1	11103	RIP-1|HRB2	KRR1 small subunit processome component homolog	Non-canonical_RBP
ENSG00000111639	MRPL51	51258	CDA09|HSPC241|bMRP64|MRP64	mitochondrial ribosomal protein L51	MRP-L51
ENSG00000111640	GAPDH	2597	GAPD	glyceraldehyde-3-phosphate dehydrogenase	Non-canonical_RBP
ENSG00000111641	NOP2	4839	NOP120|NSUN1|p120|NOL1	NOP2 nucleolar protein	Methyltr_RsmB-F
ENSG00000111642	CHD4	1108	Mi-2b|Mi2-BETA	chromodomain helicase DNA binding protein 4	ResIII
ENSG00000111667	USP5	8078	IsoT	ubiquitin specific peptidase 5	Non-canonical_RBP
ENSG00000111669	TPI1	7167	N	triosephosphate isomerase 1	Non-canonical_RBP
ENSG00000111701	APOBEC1	339	BEDP|CDAR1|APOBEC-1|HEPR	apolipoprotein B mRNA editing enzyme catalytic subunit 1	APOBEC_N
ENSG00000111716	LDHB	3945	N	lactate dehydrogenase B	Non-canonical_RBP
ENSG00000111732	AICDA	57379	HIGM2|CDA2|ARP2|AID	activation induced cytidine deaminase	APOBEC_N
ENSG00000111737	RAB35	11021	H-ray	RAB35, member RAS oncogene family	MMR_HSR1
ENSG00000111786	SRSF9	8683	SRp30c|SFRS9	serine and arginine rich splicing factor 9	RRM_1
ENSG00000111801	BTN3A3	10384	BTF3|BTN3.3	butyrophilin subfamily 3 member A3	Non-canonical_RBP
ENSG00000111802	TDP2	51567	TTRAP	tyrosyl-DNA phosphodiesterase 2	Exo_endo_phos
ENSG00000111845	PAK1IP1	55003	FLJ20624|hPIP1|PIP1|bA421M1.5|MAK11|WDR84	PAK1 interacting protein 1	Non-canonical_RBP
ENSG00000111880	RNGTT	8732	HCE|HCE1|hCAP	RNA guanylyltransferase and 5'-phosphatase	mRNA_cap_enzyme
ENSG00000111911	HINT3	135114	FLJ33126	histidine triad nucleotide binding protein 3	DcpS_C
ENSG00000112031	MTRF1L	54516	HMRF1L|mtRF1a	mitochondrial translational release factor 1 like	RF-1
ENSG00000112081	SRSF3	6428	SRp20|SFRS3	serine and arginine rich splicing factor 3	RRM_1
ENSG00000112110	MRPL18	29074	HSPC071	mitochondrial ribosomal protein L18	Ribosomal_L18p
ENSG00000112118	MCM3	4172	N	minichromosome maintenance complex component 3	Non-canonical_RBP
ENSG00000112159	MDN1	23195	KIAA0301|Rea1	midasin AAA ATPase 1	Non-canonical_RBP
ENSG00000112183	RBM24	221662	FLJ30829|dJ259A10.1|RNPC6	RNA binding motif protein 24	RRM_1
ENSG00000112210	RAB23	51715	-	RAB23, member RAS oncogene family	MMR_HSR1
ENSG00000112232	KHDRBS2	202559	SLM1|SLM-1|MGC26664	KH RNA binding domain containing, signal transduction associated 2	KH_1
ENSG00000112249	ASCC3	10973	RNAH|ASC1p200|dJ121G13.4|dJ467N11.1|HELIC1	activating signal cointegrator 1 complex subunit 3	DEAD
ENSG00000112305	SMAP1	60682	FLJ13159|SMAP-1	small ArfGAP 1	Non-canonical_RBP
ENSG00000112306	RPS12	6206	S12	ribosomal protein S12	Ribosomal_L7Ae
ENSG00000112339	HBS1L	10767	ERFS|HBS1|HSPC276|KIAA1038|DKFZp434g247|EF-1a|eRF3c	HBS1 like translational GTPase	GTP_EFTU
ENSG00000112357	PEX7	5191	PTS2R|RD	peroxisomal biogenesis factor 7	eIF2A
ENSG00000112365	ZBTB24	9841	KIAA0441|BIF1|PATZ2|ZNF450	zinc finger and BTB domain containing 24	zf-C2H2
ENSG00000112531	QKI	9444	QK3	QKI, KH domain containing RNA binding	KH_1
ENSG00000112578	BYSL	705	Enp1	bystin like	Bystin
ENSG00000112651	MRPL2	51069	MRP-L14|RPML14|CGI-22	mitochondrial ribosomal protein L2	Ribosomal_L2
ENSG00000112739	PRPF4B	8899	Prp4|PR4H|KIAA0536	pre-mRNA processing factor 4B	Non-canonical_RBP
ENSG00000112742	TTK	7272	MPS1|MPS1L1|CT96|MPH1	TTK protein kinase	Non-canonical_RBP
ENSG00000112773	TENT5A	55603	FLJ20037|C6orf37|FAM46A	terminal nucleotidyltransferase 5A	NTP_transf_7
ENSG00000112941	TENT4A	11044	POLK|TRF4|LAK-1|TRF4-1|POLS|PAPD7	terminal nucleotidyltransferase 4A	PAP_assoc
ENSG00000112977	DAP	1611	N	death associated protein	Non-canonical_RBP
ENSG00000112984	KIF20A	10112	RAB6KIFL	kinesin family member 20A	Non-canonical_RBP
ENSG00000112992	NNT	23530	N	nicotinamide nucleotide transhydrogenase	Non-canonical_RBP
ENSG00000112996	MRPS30	10884	PAP|PDCD9	mitochondrial ribosomal protein S30	PDCD9
ENSG00000113013	HSPA9	3313	GRP75|PBP74|mot-2|mthsp75|HSPA9B	heat shock protein family A (Hsp70) member 9	Non-canonical_RBP
ENSG00000113048	MRPS27	23107	KIAA0264	mitochondrial ribosomal protein S27	MRP-S27
ENSG00000113272	THG1L	54974	ICF45|FLJ11601|FLJ20546|IHG-1|hTHG1	tRNA-histidine guanylyltransferase 1 like	Thg1
ENSG00000113282	CLINT1	9685	ENTH|KIAA0171|EPNR|CLINT	clathrin interactor 1	Non-canonical_RBP
ENSG00000113300	CNOT6	57472	CCR4|KIAA1194|Ccr4a	CCR4-NOT transcription complex subunit 6	Exo_endo_phos
ENSG00000113318	MSH3	4437	DUP|MRP1	mutS homolog 3	Non-canonical_RBP
ENSG00000113356	POLR3G	10622	RPC32|RPC7	RNA polymerase III subunit G	RNA_pol_3_Rpc31
ENSG00000113360	DROSHA	29102	RNASE3L|Etohi2|HSA242976|RN3|RNASEN	drosha ribonuclease III	Ribonucleas_3_3
ENSG00000113368	LMNB1	4001	N	lamin B1	Non-canonical_RBP
ENSG00000113387	SUB1	10923	PC4|p15|p14	SUB1 homolog, transcriptional regulator	PC4
ENSG00000113391	FAM172A	83989	DKFZP564D172|Toupee|C5orf21	family with sequence similarity 172 member A	Arb2
ENSG00000113407	TARS	6897	N	threonyl-tRNA synthetase	tRNA-synt_2b
ENSG00000113460	BRIX1	55299	BRIX|FLJ11100|BXDC2	biogenesis of ribosomes BRX1	Brix
ENSG00000113522	RAD50	10111	hRad50|RAD50-2	RAD50 double strand break repair protein	Non-canonical_RBP
ENSG00000113569	NUP155	9631	KIAA0791|N155	nucleoporin 155	Non-canonical_RBP
ENSG00000113580	NR3C1	2908	GR|GRL	nuclear receptor subfamily 3 group C member 1	Non-canonical_RBP
ENSG00000113643	RARS	5917	DALRD1	arginyl-tRNA synthetase	tRNA-synt_1d
ENSG00000113648	H2AFY	9555	macroH2A1.2	H2A histone family member Y	Non-canonical_RBP
ENSG00000113649	TCERG1	10915	CA150|Urn1|TAF2S	transcription elongation regulator 1	Non-canonical_RBP
ENSG00000113657	DPYSL3	1809	DRP-3|ULIP|CRMP4	dihydropyrimidinase like 3	Non-canonical_RBP
ENSG00000113712	CSNK1A1	1452	CK1|CK1a|CK1alpha|CKIa|CKIalpha	casein kinase 1 alpha 1	Non-canonical_RBP
ENSG00000113742	CPEB4	80315	KIAA1673	cytoplasmic polyadenylation element binding protein 4	RRM_1
ENSG00000113758	DBN1	1627	D0S117E	drebrin 1	Non-canonical_RBP
ENSG00000113761	ZNF346	23567	JAZ|Zfp346	zinc finger protein 346	zf-met
ENSG00000113810	SMC4	10051	hCAP-C|CAP-C|SMC4L1	structural maintenance of chromosomes 4	Non-canonical_RBP
ENSG00000113916	BCL6	604	ZBTB27|LAZ3|BCL5|BCL6A|ZNF51	BCL6 transcription repressor	zf-C2H2
ENSG00000113966	ARL6	84100	RP55|BBS3	ADP ribosylation factor like GTPase 6	MMR_HSR1
ENSG00000114030	KPNA1	3836	SRP1|RCH2|NPI-1|IPOA5	karyopherin subunit alpha 1	Non-canonical_RBP
ENSG00000114127	XRN1	54464	44440	5'-3' exoribonuclease 1	XRN_N
ENSG00000114302	PRKAR2A	5576	PRKAR2	protein kinase cAMP-dependent type II regulatory subunit alpha	Non-canonical_RBP
ENSG00000114353	GNAI2	2771	GIP|GNAI2B	G protein subunit alpha i2	Non-canonical_RBP
ENSG00000114391	RPL24	6152	L24	ribosomal protein L24	Ribosomal_L24e
ENSG00000114416	FXR1	8087	N	FMR1 autosomal homolog 1	FXMRP1_C_core
ENSG00000114480	GBE1	2632	N	1,4-alpha-glucan branching enzyme 1	Non-canonical_RBP
ENSG00000114503	NCBP2	22916	NIP1|CBP20|Cbc2	nuclear cap binding protein subunit 2	RRM_1
ENSG00000114573	ATP6V1A	523	Vma1|VA68|VPP2|ATP6A1|ATP6V1A1	ATPase H+ transporting V1 subunit A	Non-canonical_RBP
ENSG00000114686	MRPL3	11222	MRL3|RPML3	mitochondrial ribosomal protein L3	Ribosomal_L3
ENSG00000114735	HEMK1	51409	MTQ1	HemK methyltransferase family member 1	MTS
ENSG00000114767	RRP9	9136	U3-55K|RNU3IP2	ribosomal RNA processing 9, U3 small nucleolar RNA binding protein	Non-canonical_RBP
ENSG00000114784	EIF1B	10289	GC20	eukaryotic translation initiation factor 1B	SUI1
ENSG00000114853	ZBTB47	92999	KIAA1190|DKFZp434N0615|ZNF651	zinc finger and BTB domain containing 47	zf-C2H2
ENSG00000114857	NKTR	4820	p104	natural killer cell triggering receptor	Non-canonical_RBP
ENSG00000114867	EIF4G1	1981	p220|PARK18|EIF4G|EIF4F	eukaryotic translation initiation factor 4 gamma 1	MIF4G
ENSG00000114942	EEF1B2	1933	N	eukaryotic translation elongation factor 1 beta 2	EF1_GNE
ENSG00000115053	NCL	4691	C23|Nsr1	nucleolin	RRM_1
ENSG00000115091	ACTR3	10096	ARP3	actin related protein 3	Non-canonical_RBP
ENSG00000115128	SF3B6	51639	P14|SF3B14a|Ht006|CGI-110|SAP14a|SF3B14	splicing factor 3b subunit 6	RRM_1
ENSG00000115137	DNAJC27	51277	RabJS|RBJ	DnaJ heat shock protein family (Hsp40) member C27	MMR_HSR1
ENSG00000115159	GPD2	2820	N	glycerol-3-phosphate dehydrogenase 2	Non-canonical_RBP
ENSG00000115183	TANC1	85461	KIAA1728|ROLSB	tetratricopeptide repeat, ankyrin repeat and coiled-coil containing 1	Non-canonical_RBP
ENSG00000115211	EIF2B4	8890	EIF2Bdelta|EIF-2B|DKFZP586J0119|EIF2B	eukaryotic translation initiation factor 2B subunit delta	IF-2B
ENSG00000115241	PPM1G	5496	PP2CG|PP2Cgamma	protein phosphatase, Mg2+/Mn2+ dependent 1G	Non-canonical_RBP
ENSG00000115267	IFIH1	64135	MDA-5|Hlcd|MDA5|IDDM19	interferon induced with helicase C domain 1	RIG-I_C-RD
ENSG00000115268	RPS15	6209	RIG|MGC111130|S15	ribosomal protein S15	Ribosomal_S19
ENSG00000115275	MOGS	7841	GCS1|CWH41|DER7	mannosyl-oligosaccharide glucosidase	Non-canonical_RBP
ENSG00000115306	SPTBN1	6711	N	spectrin beta, non-erythrocytic 1	Non-canonical_RBP
ENSG00000115310	RTN4	57142	NSP-CL|KIAA0886|NOGO|ASY	reticulon 4	Non-canonical_RBP
ENSG00000115364	MRPL19	9801	MRP-L15|RPML15|KIAA0104|RLX1	mitochondrial ribosomal protein L19	Ribosomal_L19
ENSG00000115368	WDR75	84128	FLJ12519|NET16|UTP17	WD repeat domain 75	Non-canonical_RBP
ENSG00000115414	FN1	2335	MSF|CIG|LETS|GFND2|FINC	fibronectin 1	Non-canonical_RBP
ENSG00000115415	STAT1	6772	STAT91|ISGF-3	signal transducer and activator of transcription 1	Non-canonical_RBP
ENSG00000115421	PAPOLG	64895	FLJ12972	poly(A) polymerase gamma	PAP_RNA-bind
ENSG00000115484	CCT4	10575	Cctd	chaperonin containing TCP1 subunit 4	Non-canonical_RBP
ENSG00000115524	SF3B1	23451	SAP155|SF3b155|PRPF10|Prp10|Hsh155	splicing factor 3b subunit 1	SF3b1
ENSG00000115641	FHL2	2274	SLIM3|DRAL	four and a half LIM domains 2	Non-canonical_RBP
ENSG00000115677	HDLBP	3069	HBP|VGL	high density lipoprotein binding protein	KH_1
ENSG00000115760	BIRC6	57448	BRUCE	baculoviral IAP repeat containing 6	Non-canonical_RBP
ENSG00000115761	NOL10	79954	FLJ14075|PQBP5	nucleolar protein 10	NUC153
ENSG00000115816	CEBPZ	10153	CBF2|CTF2	CCAAT enhancer binding protein zeta	CBF
ENSG00000115839	RAB3GAP1	22930	RAB3GAP|KIAA0066|RAB3GAP130|WARBM1	RAB3 GTPase activating protein catalytic subunit 1	Non-canonical_RBP
ENSG00000115866	DARS	1615	N	aspartyl-tRNA synthetase	tRNA-synt_2
ENSG00000115875	SRSF7	6432	9G8|ZCRB2|HSSG1|AAG3|RBM37|ZCCHC20|SFRS7	serine and arginine rich splicing factor 7	RRM_1
ENSG00000115946	PNO1	56902	RRP20|KHRBP1	partner of NOB1 homolog	Non-canonical_RBP
ENSG00000115970	THADA	63892	FLJ21877|KIAA1767|GITA|ARMC13	THADA armadillo repeat containing	Non-canonical_RBP
ENSG00000116001	TIA1	7072	N	TIA1 cytotoxic granule associated RNA binding protein	RRM_1
ENSG00000116030	SUMO1	7341	PIC1|GMP1|SMT3C|SUMO-1|SMT3H3|OFC10|UBL1	small ubiquitin like modifier 1	Non-canonical_RBP
ENSG00000116062	MSH6	2956	GTBP	mutS homolog 6	Non-canonical_RBP
ENSG00000116120	FARSB	10056	PheHB|FRSB|FARSLB	phenylalanyl-tRNA synthetase subunit beta	B3_4
ENSG00000116161	CACYBP	27101	SIP|S100A6BP	calcyclin binding protein	Non-canonical_RBP
ENSG00000116221	MRPL37	51253	RPML2|MRP-L2	mitochondrial ribosomal protein L37	PDCD9
ENSG00000116251	RPL22	6146	EAP|L22	ribosomal protein L22	Ribosomal_L22e
ENSG00000116254	CHD5	26038	-	chromodomain helicase DNA binding protein 5	ResIII
ENSG00000116288	PARK7	11315	DJ-1|DJ1|GATD2	Parkinsonism associated deglycase	Non-canonical_RBP
ENSG00000116337	AMPD2	271	SPG63	adenosine monophosphate deaminase 2	Non-canonical_RBP
ENSG00000116350	SRSF4	6429	SRP75|SFRS4	serine and arginine rich splicing factor 4	RRM_1
ENSG00000116489	CAPZA1	829	N	capping actin protein of muscle Z-line subunit alpha 1	Non-canonical_RBP
ENSG00000116560	SFPQ	6421	PSF|PPP1R140	splicing factor proline and glutamine rich	RRM_1
ENSG00000116584	ARHGEF2	9181	LFP40|GEF-H1|KIAA0651|P40	Rho/Rac guanine nucleotide exchange factor 2	Non-canonical_RBP
ENSG00000116641	DOCK7	85440	KIAA1771|ZIR2	dedicator of cytokinesis 7	Non-canonical_RBP
ENSG00000116668	SWT1	54823	FLJ20121|HsSwt1|C1orf26	SWT1 RNA endoribonuclease homolog	PIN_4
ENSG00000116688	MFN2	9927	CPRP1|KIAA0214|MARF|CMT2A2	mitofusin 2	MMR_HSR1
ENSG00000116698	SMG7	9887	KIAA0250|EST1C|SGA56M|SMG-7|C1orf16	SMG7 nonsense mediated mRNA decay factor	EST1_DNA_bind
ENSG00000116711	PLA2G4A	5321	cPLA2-alpha|PLA2G4	phospholipase A2 group IVA	Non-canonical_RBP
ENSG00000116717	GADD45A	1647	GADD45|DDIT1	growth arrest and DNA damage inducible alpha	Ribosomal_L7Ae
ENSG00000116747	RO60	6738	Ro60|SSA2|TROVE2	Ro60, Y RNA binding protein	TROVE
ENSG00000116750	UCHL5	51377	UCH37|CGI-70|INO80R	ubiquitin C-terminal hydrolase L5	Non-canonical_RBP
ENSG00000116754	SRSF11	9295	p54|NET2|SFRS11	serine and arginine rich splicing factor 11	RRM_1
ENSG00000116815	CD58	965	LFA3	CD58 molecule	Non-canonical_RBP
ENSG00000116830	TTF2	8458	HuF2|ZGRF6	transcription termination factor 2	ResIII
ENSG00000116871	MAP7D1	55700	FLJ10350|FLJ39022|PARCC1|RPRC1	MAP7 domain containing 1	Non-canonical_RBP
ENSG00000116874	WARS2	10352	TrpRS	tryptophanyl tRNA synthetase 2, mitochondrial	tRNA-synt_1b
ENSG00000116898	MRPS15	64960	FLJ11564	mitochondrial ribosomal protein S15	Ribosomal_S15
ENSG00000116918	TSNAX	7257	TRAX|C3PO	translin associated factor X	Translin
ENSG00000117133	RPF1	80135	BXDC5	ribosome production factor 1 homolog	Brix
ENSG00000117360	PRPF3	9129	Prp3|hPrp3|SNRNP90|RP18	pre-mRNA processing factor 3	PRP3
ENSG00000117385	P3H1	64175	GROS1|LEPRECAN|MGC117314|LEPRE1	prolyl 3-hydroxylase 1	hmm_2OG-FeII_Oxy
ENSG00000117395	EBNA1BP2	10969	NOBP|EBP2|P40	EBNA1 binding protein 2	Ebp2
ENSG00000117408	IPO13	9670	IMP13|KIAA0724|RANBP13	importin 13	Xpo1
ENSG00000117419	ERI3	79033	FLJ22943|PINT1|PRNPIP	ERI1 exoribonuclease family member 3	RNase_T
ENSG00000117450	PRDX1	5052	NKEFA|PAGA	peroxiredoxin 1	Non-canonical_RBP
ENSG00000117481	NSUN4	387338	MGC22960|SHTAP	NOP2/Sun RNA methyltransferase 4	Methyltr_RsmB-F
ENSG00000117519	CNN3	1266	N	calponin 3	Non-canonical_RBP
ENSG00000117523	PRRC2C	23215	KIAA1096|XTP2|BAT2D1|BAT2L2	proline rich coiled-coil 2C	Non-canonical_RBP
ENSG00000117569	PTBP2	58155	brPTB|nPTB|PTB|PTBLP	polypyrimidine tract binding protein 2	RRM_5
ENSG00000117593	DARS2	55157	FLJ10514	aspartyl-tRNA synthetase 2, mitochondrial	tRNA-synt_2
ENSG00000117597	UTP25	27042	MGC29875|DEF|C1orf107|DIEXF	UTP25 small subunit processor component	Non-canonical_RBP
ENSG00000117614	SYF2	25949	p29|DKFZp564O2082|NTC31|fSAP29|CBPIN	SYF2 pre-mRNA splicing factor	SYF2
ENSG00000117713	ARID1A	8289	B120|P270|C10rf4|BAF250|BAF250a|C1orf4|SMARCF1	AT-rich interaction domain 1A	Non-canonical_RBP
ENSG00000117724	CENPF	1063	hcp-1	centromere protein F	Non-canonical_RBP
ENSG00000117877	CD3EAP	10849	ASE-1|CAST|PAF49	CD3e molecule associated protein	RNA_polI_A34
ENSG00000118058	KMT2A	4297	TRX1|HRX|ALL-1|HTRX1|CXXC7|MLL1A|MLL	lysine methyltransferase 2A	Non-canonical_RBP
ENSG00000118181	RPS25	6230	S25	ribosomal protein S25	Ribosomal_S25
ENSG00000118193	KIF14	9928	KIAA0042	kinesin family member 14	Non-canonical_RBP
ENSG00000118197	DDX59	83479	DKFZP564B1023|ZNHIT5	DEAD-box helicase 59	DEAD
ENSG00000118246	FASTKD2	22868	KIAA0971	FAST kinase domains 2	RAP
ENSG00000118363	SPCS2	9789	KIAA0102	signal peptidase complex subunit 2	Non-canonical_RBP
ENSG00000118482	PHF3	23469	N	PHD finger protein 3	Non-canonical_RBP
ENSG00000118495	PLAGL1	5325	ZAC|LOT1	PLAG1 like zinc finger 1	zf-C2H2
ENSG00000118507	AKAP7	9465	AKAP18|AKAP15	A-kinase anchoring protein 7	AKAP7_NLS
ENSG00000118705	RPN2	6185	SWP1|RPNII|RIBIIR|RPN-II	ribophorin II	Non-canonical_RBP
ENSG00000118873	RAB3GAP2	25782	RAB3-GAP150|KIAA0839|DKFZP434D245|SPG69	RAB3 GTPase activating non-catalytic protein subunit 2	Non-canonical_RBP
ENSG00000119041	GTF3C3	9330	TFiiiC2-102|TFIIIC102	general transcription factor IIIC subunit 3	Non-canonical_RBP
ENSG00000119139	TJP2	9414	ZO-2|X104|ZO2|DFNA51	tight junction protein 2	Non-canonical_RBP
ENSG00000119203	CPSF3	51692	CPSF-73|CPSF73|YSH1	cleavage and polyadenylation specific factor 3	CPSF73-100_C
ENSG00000119285	HEATR1	55127	FLJ10359|BAP28|UTP10	HEAT repeat containing 1	U3snoRNP10
ENSG00000119314	PTBP3	9991	DKFZp781I1117|ROD1	polypyrimidine tract binding protein 3	RRM_5
ENSG00000119335	SET	6418	PHAPII|2PP2A|IPP2A2|TAF-IBETA|IGAAD|TAF-I	SET nuclear proto-oncogene	Non-canonical_RBP
ENSG00000119392	GLE1	2733	hGLE1|GLE1L|LCCS1	GLE1 RNA export mediator	GLE1
ENSG00000119396	RAB14	51552	FBP|RAB-14	RAB14, member RAS oncogene family	MMR_HSR1
ENSG00000119446	RBM18	92400	MGC2734	RNA binding motif protein 18	RRM_1
ENSG00000119596	YLPM1	56252	ZAP|PPP1R169|C14orf170	YLP motif containing 1	Non-canonical_RBP
ENSG00000119616	FCF1	51077	CGI-35|Bka|UTP24|C14orf111	FCF1 rRNA-processing protein	Fcf1
ENSG00000119705	SLIRP	81892	DC50|C14orf156	SRA stem-loop interacting RNA binding protein	RRM_1
ENSG00000119707	RBM25	58517	S164|fSAP94|NET52|Snu71|RNPC7	RNA binding motif protein 25	PWI
ENSG00000119718	EIF2B2	8892	EIF2B|EIF-2Bbeta	eukaryotic translation initiation factor 2B subunit beta	IF-2B
ENSG00000119720	NRDE2	55051	FLJ14051|C14orf102	NRDE-2, necessary for RNA interference, domain containing	NRDE-2
ENSG00000119777	TMEM214	54867	FLJ20254	transmembrane protein 214	Non-canonical_RBP
ENSG00000119812	FAM98A	25940	DKFZP564F0522	family with sequence similarity 98 member A	DUF2465
ENSG00000119922	IFIT2	3433	IFI-54|ISG-54K|cig42|GARG-39|IFI54|G10P2	interferon induced protein with tetratricopeptide repeats 2	Non-canonical_RBP
ENSG00000119953	SMNDC1	10285	SPF30|SMNR|TDRD16C	survival motor neuron domain containing 1	SMN
ENSG00000119969	HELLS	3070	PASG|SMARCA6|LSH|Nbla10143	helicase, lymphoid specific	ResIII
ENSG00000120053	GOT1	2805	AST1	glutamic-oxaloacetic transaminase 1	Non-canonical_RBP
ENSG00000120158	RCL1	10171	RPCL1|RNAC	RNA terminal phosphate cyclase like 1	RTC
ENSG00000120254	MTHFD1L	25902	DKFZP586G1517|FLJ21145|FTHFSDC1	methylenetetrahydrofolate dehydrogenase (NADP+ dependent) 1 like	Non-canonical_RBP
ENSG00000120265	PCMT1	5110	N	protein-L-isoaspartate (D-aspartate) O-methyltransferase	Non-canonical_RBP
ENSG00000120333	MRPS14	63931	HSMRPS14	mitochondrial ribosomal protein S14	Ribosomal_S14
ENSG00000120438	TCP1	6950	D6S230E|CCT1|Ccta	t-complex 1	Non-canonical_RBP
ENSG00000120658	ENOX1	55068	FLJ10094|PIG38|CNOX|cCNOX	ecto-NOX disulfide-thiol exchanger 1	RRM_1
ENSG00000120662	MTRF1	9617	RF1|MTTRF1|MGC47721	mitochondrial translation release factor 1	RF-1
ENSG00000120688	WBP4	11193	FBP21|MGC117310	WW domain binding protein 4	zf-U1
ENSG00000120694	HSPH1	10808	HSP105B|KIAA0201|HSP105A|NY-CO-25	heat shock protein family H (Hsp110) member 1	Non-canonical_RBP
ENSG00000120699	EXOSC8	11340	OIP2|RRP43|bA421P11.3|Rrp43p|EAP2|p9|CIP3	exosome component 8	RNase_PH
ENSG00000120705	ETF1	2107	eRF1|TB3-1|RF1|SUP45L1|ERF1|ERF	eukaryotic translation termination factor 1	eRF1_2
ENSG00000120727	PAIP2	51247	PAIP2A	poly(A) binding protein interacting protein 2	PAM2
ENSG00000120733	KDM3B	51780	KIAA1082|NET22|C5orf7|JMJD1B	lysine demethylase 3B	Non-canonical_RBP
ENSG00000120800	UTP20	27340	DRIM|1A6/DRIM	UTP20 small subunit processome component	DRIM
ENSG00000120802	TMPO	7112	TP|LAP2|LEMD4	thymopoietin	Non-canonical_RBP
ENSG00000120805	ARL1	400	ARFL1	ADP ribosylation factor like GTPase 1	MMR_HSR1
ENSG00000120832	MTERF2	80298	FLJ14062|MTERFD3	mitochondrial transcription termination factor 2	mTERF
ENSG00000120948	TARDBP	23435	TDP-43|ALS10	TAR DNA binding protein	RRM_1
ENSG00000120963	ZNF706	51123	HSPC038	zinc finger protein 706	zf-met
ENSG00000121057	AKAP1	8165	AKAP121|AKAP149|SAKAP84|S-AKAP84|AKAP84|D-AKAP1|PPP1R43|TDRD17|PRKA1	A-kinase anchoring protein 1	TUDOR
ENSG00000121058	COIL	8161	CLN80|p80-coilin	coilin	Non-canonical_RBP
ENSG00000121060	TRIM25	7706	EFP|RNF147|ZNF147	tripartite motif containing 25	Non-canonical_RBP
ENSG00000121152	NCAPH	23397	CAP-H|hCAP-H|BRRN1	non-SMC condensin I complex subunit H	Non-canonical_RBP
ENSG00000121210	TMEM131L	23240	DKFZp586H1322|KIAA0922	transmembrane 131 like	Non-canonical_RBP
ENSG00000121274	TENT4B	64282	TRF4-2|TUT3|PAPD5	terminal nucleotidyltransferase 4B	PAP_assoc
ENSG00000121390	PSPC1	55269	PSP1|FLJ10955	paraspeckle component 1	RRM_1
ENSG00000121486	TRMT1L	81627	C1orf25	tRNA methyltransferase 1 like	TRM
ENSG00000121766	ZCCHC17	51538	PS1D|HSPC251|pNO40	zinc finger CCHC-type containing 17	S1
ENSG00000121774	KHDRBS1	10657	Sam68|p62|FLJ34027	KH RNA binding domain containing, signal transduction associated 1	KH_1
ENSG00000121851	POLR3GL	84265	flj32422|MGC3200	RNA polymerase III subunit G like	RNA_pol_3_Rpc31
ENSG00000121892	PDS5A	23244	KIAA0648|PIG54|SCC-112	PDS5 cohesin associated factor A	Non-canonical_RBP
ENSG00000121988	ZRANB3	84083	DKFZP434B1727	zinc finger RANBP2-type containing 3	ResIII
ENSG00000122026	RPL21	6144	L21|FLJ27458|MGC71252|MGC104274|MGC104275|DKFZp686C06101	ribosomal protein L21	Ribosomal_L21e
ENSG00000122035	RASL11A	387496	-	RAS like family 11 member A	MMR_HSR1
ENSG00000122068	FYTTD1	84248	DKFZp761B1514|UIF	forty-two-three domain containing 1	FYTT
ENSG00000122085	MTERF4	130916	MGC61716|MTERFD2	mitochondrial transcription termination factor 4	mTERF
ENSG00000122126	OCRL	4952	OCRL1	OCRL inositol polyphosphate-5-phosphatase	Exo_endo_phos
ENSG00000122140	MRPS2	51116	CGI-91	mitochondrial ribosomal protein S2	Ribosomal_S2
ENSG00000122218	COPA	1314	HEP-COP	coatomer protein complex subunit alpha	Non-canonical_RBP
ENSG00000122257	RBBP6	5930	P2P-R|PACT|SNAMA	RB binding protein 6, ubiquitin ligase	zf-CCHC_2
ENSG00000122299	ZC3H7A	29066	HSPC055|FLJ20318|ZC3HDC7|ZC3H7	zinc finger CCCH-type containing 7A	zf-CCCH
ENSG00000122359	ANXA11	311	ANX11	annexin A11	Non-canonical_RBP
ENSG00000122386	ZNF205	7755	Zfp13|ZNF210	zinc finger protein 205	zf-C2H2
ENSG00000122406	RPL5	6125	L5|PPP1R135|uL18	ribosomal protein L5	Non-canonical_RBP
ENSG00000122435	TRMT13	54482	FLJ10287|FLJ11219|CCDC76	tRNA methyltransferase 13 homolog	TRM13
ENSG00000122545	44446	989	CDC3|SEPT7A|CDC10	septin 7	MMR_HSR1
ENSG00000122565	CBX3	11335	HP1Hs-gamma	chromobox 3	Non-canonical_RBP
ENSG00000122566	HNRNPA2B1	3181	HNRPA2B1	heterogeneous nuclear ribonucleoprotein A2/B1	RRM_1
ENSG00000122644	ARL4A	10124	ARL4	ADP ribosylation factor like GTPase 4A	MMR_HSR1
ENSG00000122687	MRM2	29960	FJH1|RRMJ2|FTSJ2	mitochondrial rRNA methyltransferase 2	FtsJ
ENSG00000122692	SMU1	55234	SMU-1|FLJ10805|BWD|fSAP57	SMU1 DNA replication regulator and spliceosomal factor	Non-canonical_RBP
ENSG00000122729	ACO1	48	IRP1|IREBP|IREB1	aconitase 1	Aconitase
ENSG00000122786	CALD1	800	CDM|H-CAD|L-CAD	caldesmon 1	Non-canonical_RBP
ENSG00000122870	BICC1	80114	N	BicC family RNA binding protein 1	KH_1
ENSG00000122884	P4HA1	5033	C-P4Halpha(I)|P4HA	prolyl 4-hydroxylase subunit alpha 1	hmm_2OG-FeII_Oxy
ENSG00000122965	RBM19	9904	DKFZp586F1023|KIAA0682|Mrd1	RNA binding motif protein 19	RRM_1
ENSG00000122966	CIT	11113	KIAA0949|STK21|CRIK|CITK	citron rho-interacting serine/threonine kinase	Non-canonical_RBP
ENSG00000123064	DDX54	79039	MGC2835|APR-5|DP97	DEAD-box helicase 54	DEAD
ENSG00000123136	DDX39A	10212	DDXL|BAT1L|URH49|DDX39	DExD-box helicase 39A	DEAD
ENSG00000123144	TRIR	79002	MGC2803|fSAP18|TERCIR|C19orf43	telomerase RNA component interacting RNase	Non-canonical_RBP
ENSG00000123200	ZC3H13	23091	DKFZp434D1812|Xio|KIAA0853	zinc finger CCCH-type containing 13	zf-CCCH
ENSG00000123213	NLN	57486	KIAA1226|AGTBP	neurolysin	Non-canonical_RBP
ENSG00000123297	TSFM	10102	EF-Tsmt|EF-TS	Ts translation elongation factor, mitochondrial	EF_TS
ENSG00000123352	SPATS2	65244	SPATA10|SCR59|FLJ13117	spermatogenesis associated serine rich 2	DUF1387
ENSG00000123570	RAB9B	51209	RAB9L	RAB9B, member RAS oncogene family	MMR_HSR1
ENSG00000123595	RAB9A	9367	RAB9	RAB9A, member RAS oncogene family	MMR_HSR1
ENSG00000123636	BAZ2B	29994	WALp4	bromodomain adjacent to zinc finger domain 2B	MBD
ENSG00000123737	EXOSC9	5393	PM/Scl-75|Rrp45p|RRP45|p5|p6|PMSCL1	exosome component 9	RNase_PH
ENSG00000123908	AGO2	27161	hAGO2|Q10|LINC00980|EIF2C2|CASC7	argonaute RISC catalytic component 2	Piwi
ENSG00000123983	ACSL3	2181	ACS3|PRO2194|FACL3	acyl-CoA synthetase long chain family member 3	Non-canonical_RBP
ENSG00000124160	NCOA5	57727	bA465L10.6|CIA	nuclear receptor coactivator 5	Non-canonical_RBP
ENSG00000124164	VAPB	9217	VAP-B|VAP-C|ALS8	VAMP associated protein B and C	Non-canonical_RBP
ENSG00000124177	CHD6	84181	KIAA1335|FLJ22369|dJ620E11.1|CHD5|RIGB	chromodomain helicase DNA binding protein 6	ResIII
ENSG00000124181	PLCG1	5335	PLC148|PLC-II|PLCgamma1|NCKAP3|PLC1	phospholipase C gamma 1	Non-canonical_RBP
ENSG00000124193	SRSF6	6431	SRP55|B52|SFRS6	serine and arginine rich splicing factor 6	RRM_1
ENSG00000124196	GTSF1L	149699	dJ1028D15.4|C20orf65|FAM112A	gametocyte specific factor 1 like	zf-U11-48K
ENSG00000124201	ZNFX1	57169	KIAA1404|FLJ11277	zinc finger NFX1-type containing 1	Non-canonical_RBP
ENSG00000124207	CSE1L	1434	CAS|XPO2|CSE1	chromosome segregation 1 like	IBN_N
ENSG00000124209	RAB22A	57403	-	RAB22A, member RAS oncogene family	MMR_HSR1
ENSG00000124214	STAU1	6780	PPP1R150|STAU	staufen double-stranded RNA binding protein 1	dsrm
ENSG00000124216	SNAI1	6615	SNA|SLUGH2|SNAH|SNAIL1|SNAIL	snail family transcriptional repressor 1	zf-C2H2
ENSG00000124228	DDX27	55661	dJ686N3.1|DRS1	DEAD-box helicase 27	DEAD
ENSG00000124256	ZBP1	81030	dJ718J7.3|DLM1|DLM-1|DAI|C20orf183	Z-DNA binding protein 1	z-alpha
ENSG00000124279	FASTKD3	79072	MGC5297|FLJ23274	FAST kinase domains 3	RAP
ENSG00000124333	VAMP7	6845	VAMP-7|TI-VAMP|SYBL1	vesicle associated membrane protein 7	Non-canonical_RBP
ENSG00000124374	PAIP2B	400961	KIAA1155	poly(A) binding protein interacting protein 2B	PAM2
ENSG00000124380	SNRNP27	11017	RY1|U4/U6.U5-27K	small nuclear ribonucleoprotein U4/U6.U5 subunit 27	Non-canonical_RBP
ENSG00000124383	MPHOSPH10	10199	MPP10|MPP10P|CT90|PPP1R106	M-phase phosphoprotein 10	Mpp10
ENSG00000124449	IRGC	56269	Iigp5|CINEMA|IRGC1	immunity related GTPase cinema	MMR_HSR1
ENSG00000124486	USP9X	8239	DFFRX|FAF|MRX99	ubiquitin specific peptidase 9 X-linked	Non-canonical_RBP
ENSG00000124541	RRP36	88745	dJ20C7.4|C6orf153	ribosomal RNA processing 36	RRP36
ENSG00000124562	SNRPC	6631	U1-C|Yhc1	small nuclear ribonucleoprotein polypeptide C	zf-U1
ENSG00000124570	SERPINB6	5269	PTI|CAP|PI6|DFNB91	serpin family B member 6	Non-canonical_RBP
ENSG00000124571	XPO5	57510	KIAA1291	exportin 5	Xpo1
ENSG00000124608	AARS2	57505	KIAA1270|bA444E17.1|AARSL	alanyl-tRNA synthetase 2, mitochondrial	tRNA-synt_2c
ENSG00000124614	RPS10	6204	MGC88819|S10	ribosomal protein S10	S10_plectin
ENSG00000124701	APOBEC2	10930	ARCD1|ARP1	apolipoprotein B mRNA editing enzyme catalytic subunit 2	APOBEC_N
ENSG00000124713	GNMT	27232	-	glycine N-methyltransferase	Methyltransf_31
ENSG00000124782	RREB1	6239	HNT	ras responsive element binding protein 1	zf-C2H2
ENSG00000124783	SSR1	6745	TRAPA	signal sequence receptor subunit 1	Non-canonical_RBP
ENSG00000124784	RIOK1	83732	AD034|FLJ30006|bA288G3.1|RRP10	RIO kinase 1	RIO1
ENSG00000124787	RPP40	10799	bA428J1.3|RNASEP1	ribonuclease P/MRP subunit p40	Ribonuc_P_40
ENSG00000124788	ATXN1	6310	D6S504E|ATX1|SCA1	ataxin 1	AXH
ENSG00000124789	NUP153	9972	HNUP153	nucleoporin 153	zf-RanBP
ENSG00000124795	DEK	7913	D6S231E	DEK proto-oncogene	SAP
ENSG00000124831	LRRFIP1	9208	FLAP-1|FLIIAP1|TRIP|GCF-2|HUFI-1	LRR binding FLII interacting protein 1	LRRFIP
ENSG00000124942	AHNAK	79026	MGC5395	AHNAK nucleoprotein	Non-canonical_RBP
ENSG00000125107	CNOT1	23019	CDC39|NOT1H|KIAA1007|AD-005|NOT1	CCR4-NOT transcription complex subunit 1	Not1
ENSG00000125166	GOT2	2806	mitAAT|KATIV|KAT4|KYAT4	glutamic-oxaloacetic transaminase 2	Non-canonical_RBP
ENSG00000125207	PIWIL1	9271	PIWI|HIWI|CT80.1	piwi like RNA-mediated gene silencing 1	Piwi
ENSG00000125257	ABCC4	10257	MRP4|EST170205|MOAT-B|MOATB	ATP binding cassette subfamily C member 4	Non-canonical_RBP
ENSG00000125351	UPF3B	65109	RENT3B|UPF3X|HUPF3B|MRX62|UPF3BP1|UPF3BP2|UPF3BP3	UPF3B regulator of nonsense mediated mRNA decay	Smg4_UPF3
ENSG00000125352	RNF113A	7737	RNF113|Cwc24|ZNF183	ring finger protein 113A	zf-CCCH
ENSG00000125354	44445	23157	KIAA0128|SEP2|SEPT2|MGC16619|MGC20339	septin 6	MMR_HSR1
ENSG00000125445	MRPS7	51081	MRP-S|RP-S7|RPMS7	mitochondrial ribosomal protein S7	Ribosomal_S7
ENSG00000125457	MIF4GD	57409	AD023|MGC45027|SLIP1|MIFD	MIF4G domain containing	MIF4G
ENSG00000125482	TTF1	7270	N	transcription termination factor 1	Non-canonical_RBP
ENSG00000125484	GTF3C4	9329	TFIIIC90|KAT12	general transcription factor IIIC subunit 4	Non-canonical_RBP
ENSG00000125485	DDX31	64794	FLJ13633|FLJ23349|FLJ14578|PPP1R25	DEAD-box helicase 31	DEAD
ENSG00000125508	SRMS	6725	SRM|dJ697K14.1|PTK70|C20orf148	src-related kinase lacking C-terminal regulatory tyrosine and N-terminal myristylation sites	Non-canonical_RBP
ENSG00000125630	POLR1B	84172	Rpo1-2|FLJ21921|FLJ10816|RPA2	RNA polymerase I subunit B	RNA_pol_Rpb2_6
ENSG00000125651	GTF2F1	2962	TFIIF|BTF4|RAP74|TF2F1	general transcription factor IIF subunit 1	Non-canonical_RBP
ENSG00000125652	ALKBH7	84266	MGC10974|SPATA11	alkB homolog 7	hmm_2OG-FeII_Oxy_2
ENSG00000125676	THOC2	57187	THO2|dJ506G2.1|CXorf3|MRX12|MRX35	THO complex 2	Tho2
ENSG00000125691	RPL23	9349	rpL17|L23	ribosomal protein L23	Ribosomal_L14
ENSG00000125743	SNRPD2	6633	Sm-D2|SNRPD1	small nuclear ribonucleoprotein D2 polypeptide	LSM
ENSG00000125753	VASP	7408	N	vasodilator stimulated phosphoprotein	Non-canonical_RBP
ENSG00000125755	SYMPK	8189	SYM|SPK	symplekin	Symplekin_C
ENSG00000125812	GZF1	64412	dJ322G13.2|ZBTB23|ZNF336	GDNF inducible zinc finger protein 1	zf-C2H2
ENSG00000125821	DTD1	92675	DUEB|MGC119131|MGC41905|bA379J5.3|bA555E18.1|pqn-68|C20orf88|HARS2	D-aminoacyl-tRNA deacylase 1	Non-canonical_RBP
ENSG00000125835	SNRPB	6628	COD|SmB/SmB'|Sm-B/B'|snRNP-B|SNRPB1	small nuclear ribonucleoprotein polypeptides B and B1	LSM
ENSG00000125844	RRBP1	6238	ES/130|hES	ribosome binding protein 1	Non-canonical_RBP
ENSG00000125870	SNRPB2	6629	Msl1|U2B''	small nuclear ribonucleoprotein polypeptide B2	RRM_1
ENSG00000125901	MRPS26	64949	MRP-S13|MRP-S26|RPMS13|dJ534B8.3|C20orf193	mitochondrial ribosomal protein S26	MRP-S26
ENSG00000125944	HNRNPR	10236	hnRNP-R|HNRPR	heterogeneous nuclear ribonucleoprotein R	RRM_1
ENSG00000125970	RALY	22913	P542|HNRPCL2	RALY heterogeneous nuclear ribonucleoprotein	RRM_1
ENSG00000125977	EIF2S2	8894	EIF2beta|PPP1R67|EIF2	eukaryotic translation initiation factor 2 subunit beta	eIF-5_eIF-2B
ENSG00000125998	FAM83C	128876	dJ614O4.7|C20orf128	family with sequence similarity 83 member C	FAM83
ENSG00000126001	CEP250	11190	C-NAP1|CEP2	centrosomal protein 250	Non-canonical_RBP
ENSG00000126070	AGO3	192669	hAGO3|FLJ12765|EIF2C3	argonaute RISC catalytic component 3	Piwi
ENSG00000126216	TUBGCP3	10426	GCP3|Spc98p|SPBC98	tubulin gamma complex associated protein 3	Non-canonical_RBP
ENSG00000126254	RBM42	79171	MGC10433	RNA binding motif protein 42	RRM_1
ENSG00000126432	PRDX5	25824	ACR1|AOEB166|MGC142285|PRXV|PMP20|B166|PRDX6|PLP|SBBI10|MGC117264|MGC142283	peroxiredoxin 5	Non-canonical_RBP
ENSG00000126457	PRMT1	3276	HCP1|ANM1|HRMT1L2	protein arginine methyltransferase 1	MTS
ENSG00000126461	SCAF1	58506	SR-A1|FLJ00034	SR-related CTD associated factor 1	Non-canonical_RBP
ENSG00000126524	SBDS	51119	CGI-97|FLJ10917|SDS|SWDS	SBDS ribosome maturation factor	SBDS_C
ENSG00000126602	TRAP1	10131	HSP75|HSP90L	TNF receptor associated protein 1	Non-canonical_RBP
ENSG00000126653	NSRP1	84081	DKFZP434K1421|NSrp70|CCDC55	nuclear speckle splicing regulatory protein 1	DUF2040
ENSG00000126698	DNAJC8	22826	SPF31	DnaJ heat shock protein family (Hsp40) member C8	Non-canonical_RBP
ENSG00000126746	ZNF384	171017	CAGH1A|CIZ|NMP4|NP|TNRC1	zinc finger protein 384	zf-C2H2
ENSG00000126749	EMG1	10436	C2F|NEP1|Grcc2f	EMG1 N1-specific pseudouridine methyltransferase	EMG1
ENSG00000126777	KTN1	3895	KIAA0004|CG1|KNT	kinectin 1	Non-canonical_RBP
ENSG00000126814	TRMT5	57570	TRM5|KIAA1393	tRNA methyltransferase 5	Met_10
ENSG00000126883	NUP214	8021	CAIN|CAN|D9S46E|N214	nucleoporin 214	Non-canonical_RBP
ENSG00000126945	HNRNPH2	3188	hnRNPH'|FTP3|HNRPH'|HNRPH2	heterogeneous nuclear ribonucleoprotein H2	RRM_1
ENSG00000126952	NXF5	55998	N	nuclear RNA export factor 5	Tap-RNA_bind
ENSG00000127022	CANX	821	CNX|IP90|P90	calnexin	Calreticulin
ENSG00000127054	INTS11	54973	FLJ20542|RC-68|CPSF73L|INT11|CPSF3L	integrator complex subunit 11	Beta-Casp
ENSG00000127481	UBR4	23352	KIAA1307|KIAA0462|RBAF600|ZUBR1	ubiquitin protein ligase E3 component n-recognin 4	Non-canonical_RBP
ENSG00000127483	HP1BP3	50809	HP1-BP74	heterochromatin protein 1 binding protein 3	Non-canonical_RBP
ENSG00000127603	MACF1	23499	KIAA0465|ACF7|ABP620|KIAA1251|MACF|FLJ45612|FLJ46776	microtubule actin crosslinking factor 1	Non-canonical_RBP
ENSG00000127616	SMARCA4	6597	hSNF2b|BRG1|BAF190|SNF2|SWI2|SNF2-BETA|SNF2LB|FLJ39786|SNF2L4	SWI/SNF related, matrix associated, actin dependent regulator of chromatin, subfamily a, member 4	BRK
ENSG00000127804	METTL16	79066	MGC3329|METT10D	methyltransferase like 16	MTS
ENSG00000127838	PNKD	25953	DYT8|PDC|DKFZp564N1362|FPD1|MR-1|BRP17|FKSG19|TAHCCP2|KIAA1184|KIPP1184|MGC31943|PKND1|MR-1S	PNKD metallo-beta-lactamase domain containing	Lactamase_B
ENSG00000127884	ECHS1	1892	SCEH	enoyl-CoA hydratase, short chain 1	Non-canonical_RBP
ENSG00000127914	AKAP9	10142	KIAA0803|AKAP350|AKAP450|CG-NAP|YOTIAO|HYPERION|PRKA9|MU-RMS-40.16A|PPP1R45|LQT11	A-kinase anchoring protein 9	Non-canonical_RBP
ENSG00000127989	MTERF1	7978	MTERF	mitochondrial transcription termination factor 1	mTERF
ENSG00000128016	ZFP36	7538	RNF162A|TIS11|G0S24|TTP|NUP475	ZFP36 ring finger protein	zf-CCCH
ENSG00000128045	RASL11B	65997	-	RAS like family 11 member B	MMR_HSR1
ENSG00000128050	PAICS	10606	ADE2H1|AIRC|PAIS	phosphoribosylaminoimidazole carboxylase and phosphoribosylaminoimidazolesuccinocarboxamide synthase	Non-canonical_RBP
ENSG00000128159	TUBGCP6	85378	GCP6|KIAA1669|DJ402G11.6	tubulin gamma complex associated protein 6	Non-canonical_RBP
ENSG00000128191	DGCR8	54487	DGCRK6|Gy1|pasha|C22orf12	DGCR8 microprocessor complex subunit	dsrm
ENSG00000128245	YWHAH	7533	YWHA1	tyrosine 3-monooxygenase/tryptophan 5-monooxygenase activation protein eta	Non-canonical_RBP
ENSG00000128383	APOBEC3A	200315	ARP3|PHRBN	apolipoprotein B mRNA editing enzyme catalytic subunit 3A	APOBEC_N
ENSG00000128394	APOBEC3F	200316	ARP8|BK150C2.4.MRNA|KA6	apolipoprotein B mRNA editing enzyme catalytic subunit 3F	APOBEC_N
ENSG00000128534	LSM8	51691	YJR022W	LSM8 homolog, U6 small nuclear RNA associated	LSM
ENSG00000128595	CALU	813	N	calumenin	Non-canonical_RBP
ENSG00000128626	MRPS12	6183	RPS12|RPSM12|RPMS12	mitochondrial ribosomal protein S12	Ribosom_S12_S23
ENSG00000128641	MYO1B	4430	myr1	myosin IB	Non-canonical_RBP
ENSG00000128708	HAT1	8520	KAT1	histone acetyltransferase 1	Non-canonical_RBP
ENSG00000128731	HERC2	8924	jdf2|p528|D15F37S1	HECT and RLD domain containing E3 ubiquitin protein ligase 2	Non-canonical_RBP
ENSG00000128739	SNRPN	6638	SMN|SM-D|HCERN3|SNRNP-N|SNURF-SNRPN|RT-LI|PWCR	small nuclear ribonucleoprotein polypeptide N	LSM
ENSG00000128829	EIF2AK4	440275	GCN2|KIAA1338	eukaryotic translation initiation factor 2 alpha kinase 4	HGTP_anticodon2
ENSG00000128908	INO80	54617	KIAA1259|Ino80|hINO80|INO80A|INOC1	INO80 complex subunit	ResIII
ENSG00000128951	DUT	1854	dUTPase	deoxyuridine triphosphatase	Non-canonical_RBP
ENSG00000129071	MBD4	8930	MED1	methyl-CpG binding domain 4, DNA glycosylase	MBD
ENSG00000129083	COPB1	1315	COPB	coatomer protein complex subunit beta 1	Non-canonical_RBP
ENSG00000129116	PALLD	23022	KIAA0992|SIH002|CGI-151	palladin, cytoskeletal associated protein	Non-canonical_RBP
ENSG00000129245	FXR2	9513	FMR1L2	FMR1 autosomal homolog 2	FXMRP1_C_core
ENSG00000129250	KIF1C	10749	SPAX2|SPG58|SAX2	kinesin family member 1C	Non-canonical_RBP
ENSG00000129317	PUS7L	83448	DKFZP434G1415	pseudouridine synthase 7 like	TruD
ENSG00000129347	KRI1	65095	FLJ12949	KRI1 homolog	Non-canonical_RBP
ENSG00000129351	ILF3	3609	NF90|MPHOSPH4|MPP4|NFAR-1|NFAR110|NFAR-2|TCP110|NF110|DRBP76|NFAR90|NF110b|NF90a|NF90c|NF90ctv|MPP4110	interleukin enhancer binding factor 3	DZF
ENSG00000129460	NGDN	25983	DKFZP564O092|LCP5|lpd-2|NGD|CANu1|C14orf120	neuroguidin	Sas10_Utp3
ENSG00000129472	RAB2B	84932	FLJ14824	RAB2B, member RAS oncogene family	MMR_HSR1
ENSG00000129484	PARP2	10038	ADPRTL2	poly(ADP-ribose) polymerase 2	PARP
ENSG00000129521	EGLN3	112399	PHD3|HIFPH3	egl-9 family hypoxia inducible factor 3	hmm_2OG-FeII_Oxy
ENSG00000129538	RNASE1	6035	RAC1|RNS1	ribonuclease A family member 1, pancreatic	RnaseA
ENSG00000129566	TEP1	7011	TP1|TLP1|VAULT2|p240|TROVE1	telomerase associated protein 1	TROVE
ENSG00000129824	RPS4Y1	6192	MGC5070|MGC119100|S4|RPS4Y	ribosomal protein S4 Y-linked 1	Ribosomal_S4e
ENSG00000130038	CRACR2A	84766	MGC4266|EFCAB4B	calcium release activated channel regulator 2A	MMR_HSR1
ENSG00000130119	GNL3L	54552	FLJ10613|GNL3B	G protein nucleolar 3 like	MMR_HSR1
ENSG00000130222	GADD45G	10912	DDIT2|GADD45gamma|GRP17|CR6	growth arrest and DNA damage inducible gamma	Ribosomal_L7Ae
ENSG00000130227	XPO7	23039	KIAA0745|RANBP16	exportin 7	IBN_N
ENSG00000130244	FAM98C	147965	FLJ44669	family with sequence similarity 98 member C	DUF2465
ENSG00000130254	SAFB2	9667	KIAA0138	scaffold attachment factor B2	RRM_1
ENSG00000130255	RPL36	25873	DKFZp566B023|L36	ribosomal protein L36	Ribosomal_L36e
ENSG00000130299	GTPBP3	84705	MSS1|THDF1|GTPBG3|MTGP1|FLJ14700	GTP binding protein 3, mitochondrial	MMR_HSR1
ENSG00000130305	NSUN5	55695	NOL1R|p120(NOL1)|FLJ10267|NSUN5A|Ynl022cL|WBSCR20|WBSCR20A	NOP2/Sun RNA methyltransferase 5	Methyltr_RsmB-F
ENSG00000130312	MRPL34	64981	L34mt|MGC2633|MGC24974	mitochondrial ribosomal protein L34	Ribosomal_L34
ENSG00000130332	LSM7	51690	YNL147W	LSM7 homolog, U6 small nuclear RNA and mRNA degradation associated	LSM
ENSG00000130396	AFDN	4301	AF-6|AF6|MLLT4	afadin, adherens junction formation factor	Non-canonical_RBP
ENSG00000130402	ACTN4	81	FSGS1	actinin alpha 4	Non-canonical_RBP
ENSG00000130475	FCHO1	23149	KIAA0290	FCH domain only 1	U1snRNP70_N
ENSG00000130479	MAP1S	55201	FLJ10669|MAP8|C19orf5|VCY2IP1|BPY2IP1	microtubule associated protein 1S	Non-canonical_RBP
ENSG00000130520	LSM4	25804	YER112W	LSM4 homolog, U6 small nuclear RNA and mRNA degradation associated	LSM
ENSG00000130589	HELZ2	85441	PDIP1|PRIC285|KIAA1769	helicase with zinc finger 2	RNB
ENSG00000130638	ATXN10	25814	E46L|FLJ37990|SCA10	ataxin 10	Non-canonical_RBP
ENSG00000130669	PAK4	10298	N	p21 (RAC1) activated kinase 4	Non-canonical_RBP
ENSG00000130695	CEP85	64793	DKFZP434L0117|CCDC21	centrosomal protein 85	Non-canonical_RBP
ENSG00000130707	ASS1	445	CTLN1|ASS	argininosuccinate synthase 1	Non-canonical_RBP
ENSG00000130711	PRDM12	59335	PFM9	PR/SET domain 12	zf-C2H2
ENSG00000130713	EXOSC2	23404	hRrp4p|Rrp4p|RRP4|p7	exosome component 2	ECR1_N
ENSG00000130723	PRRC2B	84726	MGC10526|LQFBS-1|KIAA0515|BAT2L|BAT2L1	proline rich coiled-coil 2B	Non-canonical_RBP
ENSG00000130726	TRIM28	10155	TIF1B|KAP1|TF1B|RNF96|PPP1R157	tripartite motif containing 28	Non-canonical_RBP
ENSG00000130741	EIF2S3	1968	EIF2gamma|EIF2|EIF2G	eukaryotic translation initiation factor 2 subunit gamma	eIF2_C
ENSG00000130749	ZC3H4	23211	KIAA1064|C19orf7	zinc finger CCCH-type containing 4	zf-CCCH
ENSG00000130764	LRRC47	57470	KIAA1185|RP1-286D6.3	leucine rich repeat containing 47	B3_4
ENSG00000130803	ZNF317	57693	-	zinc finger protein 317	zf-C2H2
ENSG00000130810	PPAN	56342	SSF1|SSF2|SSF|BXDC3	peter pan homolog	Brix
ENSG00000130811	EIF3G	8666	eIF3-delta|eIF3-p44|eIF3g|EIF3S4	eukaryotic translation initiation factor 3 subunit G	eIF3g
ENSG00000130813	C19orf66	55337	FLJ11286|RyDEN|IRAV|SFL|RYDEN	chromosome 19 open reading frame 66	Non-canonical_RBP
ENSG00000130816	DNMT1	1786	MCMT|CXXC9|DNMT	DNA methyltransferase 1	Non-canonical_RBP
ENSG00000130818	ZNF426	79088	MGC2663	zinc finger protein 426	zf-C2H2
ENSG00000130826	DKC1	1736	XAP101|dyskerin|NAP57|NOLA4|Cbf5|DKC	dyskerin pseudouridine synthase 1	DKCLD
ENSG00000130856	ZNF236	7776	-	zinc finger protein 236	zf-C2H2
ENSG00000130921	C12orf65	91574	FLJ38663|SPG55	chromosome 12 open reading frame 65	RF-1
ENSG00000130935	NOL11	25926	DKFZP586L0724	nucleolar protein 11	NUC205
ENSG00000130939	UBE4B	10277	UBOX3|E4|UFD2|KIAA0684	ubiquitination factor E4B	Non-canonical_RBP
ENSG00000130956	HABP4	22927	IHABP4|SERBP1L	hyaluronan binding protein 4	HABP4_PAI-RBP1
ENSG00000130985	UBA1	7317	UBE1X|POC20|CFAP124|A1S9T|GXP1|UBE1	ubiquitin like modifier activating enzyme 1	Non-canonical_RBP
ENSG00000131013	PPIL4	85313	N	peptidylprolyl isomerase like 4	RRM_1
ENSG00000131016	AKAP12	9590	AKAP250|SSeCKS	A-kinase anchoring protein 12	Non-canonical_RBP
ENSG00000131018	SYNE1	23345	SYNE-1B|KIAA0796|8B|Nesprin-1|enaptin|MYNE1|CPG2|dJ45H2.2|SCAR8|ARCA1|Nesp1|C6orf98	spectrin repeat containing nuclear envelope protein 1	Non-canonical_RBP
ENSG00000131043	AAR2	25980	bA234K24.2|C20orf4	AAR2 splicing factor	AAR2
ENSG00000131051	RBM39	9584	CC1.3|HCC1|CAPER|fSAP59|CAPERalpha|RNPC2	RNA binding motif protein 39	RRM_1
ENSG00000131236	CAP1	10487	CAP	cyclase associated actin cytoskeleton regulatory protein 1	Non-canonical_RBP
ENSG00000131368	MRPS25	64432	MRP-S25|FLJ00023|DKFZp313H0817|RPMS25	mitochondrial ribosomal protein S25	L51_S25_CI-B8
ENSG00000131435	PDLIM4	8572	RIL	PDZ and LIM domain 4	Non-canonical_RBP
ENSG00000131469	RPL27	6155	L27	ribosomal protein L27	Ribosomal_L27e
ENSG00000131473	ACLY	47	ATPCL|CLATP|ACL	ATP citrate lyase	Non-canonical_RBP
ENSG00000131495	NDUFA2	4695	B8	NADH:ubiquinone oxidoreductase subunit A2	L51_S25_CI-B8
ENSG00000131503	ANKHD1	54882	MASK|FLJ20288|FLJ11979|FLJ10042|FLJ14127|KIAA1085|MASK1	ankyrin repeat and KH domain containing 1	KH_1
ENSG00000131504	DIAPH1	1729	hDIA1|LFHL1|DFNA1	diaphanous related formin 1	Non-canonical_RBP
ENSG00000131558	EXOC4	60412	KIAA1699|MGC27170|SEC8|Sec8p|SEC8L1	exocyst complex component 4	Non-canonical_RBP
ENSG00000131626	PPFIA1	8500	LIP.1|LIPRIN	PTPRF interacting protein alpha 1	Non-canonical_RBP
ENSG00000131711	MAP1B	4131	MAP5|PPP1R102	microtubule associated protein 1B	Non-canonical_RBP
ENSG00000131732	ZCCHC9	84240	DKFZp761J139|PPP1R41	zinc finger CCHC-type containing 9	zf-CCHC
ENSG00000131747	TOP2A	7153	TOP2	DNA topoisomerase II alpha	Non-canonical_RBP
ENSG00000131773	KHDRBS3	10656	T-STAR|Etle|etoile|SALP|SLM2|SLM-2	KH RNA binding domain containing, signal transduction associated 3	KH_1
ENSG00000131778	CHD1L	9557	ALC1	chromodomain helicase DNA binding protein 1 like	ResIII
ENSG00000131848	ZSCAN5A	79149	MGC4161|ZNF495|ZSCAN5	zinc finger and SCAN domain containing 5A	zf-C2H2
ENSG00000131876	SNRPA1	6627	Lea1|U2A'	small nuclear ribonucleoprotein polypeptide A'	Non-canonical_RBP
ENSG00000131899	LLGL1	3996	Lgl1|Mgl1|DLG4|LLGL|HUGL|HUGL-1	LLGL scribble cell polarity complex component 1	Non-canonical_RBP
ENSG00000131914	LIN28A	79727	LIN-28|FLJ12457|ZCCHC1|CSDD1|LIN28	lin-28 homolog A	CSD
ENSG00000131981	LGALS3	3958	MAC-2|GALIG|LGALS2	galectin 3	Non-canonical_RBP
ENSG00000132153	DHX30	22907	KIAA0890|FLJ11214|DDX30	DExH-box helicase 30	HA2
ENSG00000132182	NUP210	23225	GP210|POM210|FLJ22389|KIAA0906	nucleoporin 210	Non-canonical_RBP
ENSG00000132275	RRP8	23378	NML|KIAA0409	ribosomal RNA processing 8	Methyltransf_8
ENSG00000132300	PTCD3	55037	FLJ20758|DKFZp666K071	pentatricopeptide repeat domain 3	Non-canonical_RBP
ENSG00000132305	IMMT	10989	P87|P89|HMP|MINOS2|Mic60|MICOS60	inner membrane mitochondrial protein	Non-canonical_RBP
ENSG00000132313	MRPL35	51318	N	mitochondrial ribosomal protein L35	Ribosomal_L35p
ENSG00000132323	ILKAP	80895	DKFZP434J2031|FLJ10181|PPM1O	ILK associated serine/threonine phosphatase	Non-canonical_RBP
ENSG00000132341	RAN	5901	ARA24|TC4|Gsp1	RAN, member RAS oncogene family	MMR_HSR1
ENSG00000132361	CLUH	23277	CLU1|KIAA0664	clustered mitochondria homolog	eIF3_p135
ENSG00000132376	INPP5K	51763	SKIP	inositol polyphosphate-5-phosphatase K	Exo_endo_phos
ENSG00000132382	MYBBP1A	10514	P160|PAP2|FLJ37886|Pol5	MYB binding protein 1a	Non-canonical_RBP
ENSG00000132394	EEFSEC	60678	SELB|EFSEC|eEFSec	eukaryotic elongation factor, selenocysteine-tRNA specific	GTP_EFTU
ENSG00000132423	COQ3	51805	bA9819.1	coenzyme Q3, methyltransferase	Methyltransf_31
ENSG00000132463	GRSF1	2926	N	G-rich RNA sequence binding factor 1	RRM_1
ENSG00000132466	ANKRD17	26057	GTAR|KIAA0697|FLJ22206|NY-BR-16|MASK2	ankyrin repeat domain 17	KH_1
ENSG00000132467	UTP3	57050	FLJ23256|DKFZp761F222|SAS10|CRLZ1	UTP3 small subunit processome component	Sas10_Utp3
ENSG00000132478	UNK	85451	KIAA1753|ZC3HDC5|ZC3H5	unk zinc finger	zf-CCCH
ENSG00000132485	ZRANB2	9406	ZIS|ZIS1|ZIS2|ZNF265	zinc finger RANBP2-type containing 2	zf-RanBP
ENSG00000132507	EIF5A	1984	EIF5A1|EIF-5A|MGC99547|MGC104255	eukaryotic translation initiation factor 5A	eIF-5a
ENSG00000132541	RIDA	10247	UK114|P14.5|PSP|HRSP12	reactive intermediate imine deaminase A homolog	Ribonuc_L-PSP
ENSG00000132591	ERAL1	26284	HERA-B	Era like 12S mitochondrial rRNA chaperone 1	MMR_HSR1
ENSG00000132603	NIP7	51388	CGI-37|FLJ10296|HSPC031|KD93	nucleolar pre-rRNA processing protein NIP7	UPF0113
ENSG00000132646	PCNA	5111	N	proliferating cell nuclear antigen	Non-canonical_RBP
ENSG00000132661	NXT1	29107	P15|MTR2	nuclear transport factor 2 like export factor 1	NTF2
ENSG00000132664	POLR3F	10621	RPC39|RPC6	RNA polymerase III subunit F	RNA_pol_Rpc34
ENSG00000132676	DAP3	7818	MRPS29|DAP-3|MRP-S29|bMRP-10|MGC126058|MGC126059|DKFZp686G12159	death associated protein 3	DAP3
ENSG00000132698	RAB25	57111	CATX-8	RAB25, member RAS oncogene family	MMR_HSR1
ENSG00000132740	IGHMBP2	3508	ZFAND7|SMUBP2|CATF1|SMARD1|HCSA|HMN6|CMT2S	immunoglobulin mu DNA binding protein 2	R3H
ENSG00000132773	TOE1	114034	hCaf1z	target of EGR1, exonuclease	CAF1
ENSG00000132780	NASP	4678	FLB7527|FLJ31599|FLJ35510|MGC19722|MGC20372|MGC2297|DKFZp547F162|PRO1999	nuclear autoantigenic sperm protein	Non-canonical_RBP
ENSG00000132792	CTNNBL1	56259	FLJ21108|P14L|P14|NAP|NYD-SP19|C20orf33	catenin beta like 1	Non-canonical_RBP
ENSG00000132819	RBM38	55544	HSRNASEB|SEB4D|seb4B|dJ800J21.2|RNPC1	RNA binding motif protein 38	RRM_1
ENSG00000132842	AP3B1	8546	ADTB3A|HPS2	adaptor related protein complex 3 subunit beta 1	Non-canonical_RBP
ENSG00000132953	XPO4	64328	FLJ13046|KIAA1721	exportin 4	CRM1_C
ENSG00000132972	RNF17	56163	Mmip-2|SPATA23|FLJ11045|TDRD4	ring finger protein 17	TUDOR
ENSG00000133026	MYH10	4628	NMMHCB	myosin heavy chain 10	Non-canonical_RBP
ENSG00000133030	MPRIP	23164	RHOIP3|M-RIP|p116Rip	myosin phosphatase Rho interacting protein	Non-canonical_RBP
ENSG00000133104	SPART	23111	KIAA0610|TAHCCP1|SPG20	spartin	Non-canonical_RBP
ENSG00000133112	TPT1	7178	TCTP|fortilin	tumor protein, translationally-controlled 1	Non-canonical_RBP
ENSG00000133119	RFC3	5983	RFC38|MGC5276	replication factor C subunit 3	Non-canonical_RBP
ENSG00000133226	SRRM1	10250	SRM160|POP101|MGC39488	serine and arginine repetitive matrix 1	PWI
ENSG00000133477	FAM83F	113828	-	family with sequence similarity 83 member F	FAM83
ENSG00000133561	GIMAP6	474344	FLJ22690|IAN6	GTPase, IMAP family member 6	MMR_HSR1
ENSG00000133574	GIMAP4	55303	HIMAP4|FLJ11110|IMAP4|IAN1	GTPase, IMAP family member 4	MMR_HSR1
ENSG00000133606	MKRN1	23608	RNF61	makorin ring finger protein 1	zf-CCCH
ENSG00000133657	ATP13A3	79572	AFURS1	ATPase 13A3	Non-canonical_RBP
ENSG00000133703	KRAS	3845	KRAS1|KRAS2	KRAS proto-oncogene, GTPase	GTP_EFTU
ENSG00000133704	IPO8	10526	IMP8|RANBP8	importin 8	IBN_N
ENSG00000133706	LARS	51520	HSPC192|FLJ10595|FLJ21788|LARS1|LEUS|RNTLS	leucyl-tRNA synthetase	tRNA-synt_1
ENSG00000133773	CCDC59	29080	HSPC128|TAP26|BR22	coiled-coil domain containing 59	rRNA_processing
ENSG00000133858	ZFC3H1	196441	MGC23401|KIAA0546|CSRC2|PSRC2|CCDC131	zinc finger C3H1-type containing	zf-C3H1
ENSG00000134001	EIF2S1	1965	EIF-2alpha|EIF2A|EIF2	eukaryotic translation initiation factor 2 subunit alpha	EIF_2_alpha
ENSG00000134030	CTIF	9811	KIAA0427	cap binding complex dependent translation initiation factor	MIF4G
ENSG00000134046	MBD2	8932	-	methyl-CpG binding domain protein 2	MBD
ENSG00000134077	THUMPD3	25917	DKFZP434F091	THUMP domain containing 3	UPF0020
ENSG00000134108	ARL8B	55207	FLJ10702|Gie1|ARL10C	ADP ribosylation factor like GTPase 8B	MMR_HSR1
ENSG00000134186	PRPF38B	55119	FLJ10330|NET1	pre-mRNA processing factor 38B	PRP38
ENSG00000134247	PTGFRN	5738	FPRP|EWI-F|CD9P-1|FLJ11001|KIAA1436|SMAP-6|CD315	prostaglandin F2 receptor inhibitor	Non-canonical_RBP
ENSG00000134283	PPHLN1	51535	N	periphilin 1	Non-canonical_RBP
ENSG00000134287	ARF3	377	-	ADP ribosylation factor 3	MMR_HSR1
ENSG00000134308	YWHAQ	10971	HS1|14-3-3	tyrosine 3-monooxygenase/tryptophan 5-monooxygenase activation protein theta	Non-canonical_RBP
ENSG00000134313	KIDINS220	57498	ARMS	kinase D interacting substrate 220	Non-canonical_RBP
ENSG00000134318	ROCK2	9475	N	Rho associated coiled-coil containing protein kinase 2	Non-canonical_RBP
ENSG00000134333	LDHA	3939	N	lactate dehydrogenase A	Non-canonical_RBP
ENSG00000134371	CDC73	79577	parafibromin|FIHP|C1orf28|HRPT2|HRPT1	cell division cycle 73	Non-canonical_RBP
ENSG00000134398	ERN2	10595	IRE1b	endoplasmic reticulum to nucleus signaling 2	Ribonuc_2-5A
ENSG00000134419	RPS15A	6210	S15A	ribosomal protein S15a	Ribosomal_S8
ENSG00000134440	NARS	4677	NARS1	asparaginyl-tRNA synthetase	tRNA-synt_2
ENSG00000134452	FBH1	84893	FLJ14590|Fbx18|FBXO18	F-box DNA helicase 1	UvrD-helicase
ENSG00000134453	RBM17	84991	SPF45|MGC14439	RNA binding motif protein 17	G-patch
ENSG00000134533	RERG	85004	MGC15754	RAS like estrogen regulated growth inhibitor	MMR_HSR1
ENSG00000134594	RAB33A	9363	RabS10	RAB33A, member RAS oncogene family	MMR_HSR1
ENSG00000134597	RBMX2	51634	CGI-79|Snu17	RNA binding motif protein X-linked 2	RRM_1
ENSG00000134627	PIWIL4	143689	FLJ36156|HIWI2|Miwi2	piwi like RNA-mediated gene silencing 4	Piwi
ENSG00000134644	PUM1	9698	PUMH1|KIAA0099	pumilio RNA binding family member 1	PUF
ENSG00000134684	YARS	8565	YTS|YRS|tyrRS	tyrosyl-tRNA synthetase	tRNA-synt_1b
ENSG00000134697	GNL2	29889	Ngp-1|HUMAUANTIG|Nog2|Nug2	G protein nucleolar 2	MMR_HSR1
ENSG00000134698	AGO4	192670	hAGO4|KIAA1567|FLJ20033|EIF2C4	argonaute RISC component 4	Piwi
ENSG00000134717	BTF3L4	91408	MGC23908	basic transcription factor 3 like 4	Non-canonical_RBP
ENSG00000134744	TUT4	23318	KIAA0191|PAPD3|TENT3A|ZCCHC11	terminal uridylyl transferase 4	PAP_assoc
ENSG00000134748	PRPF38A	84950	FLJ14936|Prp38	pre-mRNA processing factor 38A	PRP38
ENSG00000134760	DSG1	1828	CDHF4|DSG	desmoglein 1	Non-canonical_RBP
ENSG00000134765	DSC1	1823	CDHF1	desmocollin 1	Non-canonical_RBP
ENSG00000134815	DHX34	9704	KIAA0134|DDX34	DExH-box helicase 34	HA2
ENSG00000134884	ARGLU1	55082	FLJ10154	arginine and glutamate rich 1	Non-canonical_RBP
ENSG00000134900	TPP2	7174	TPPII	tripeptidyl peptidase 2	Non-canonical_RBP
ENSG00000134905	CARS2	79587	FLJ12118	cysteinyl-tRNA synthetase 2, mitochondrial	tRNA-synt_1e
ENSG00000134910	STT3A	3703	TMC|MGC9042|STT3-A|ITM1	STT3 oligosaccharyltransferase complex catalytic subunit A	Non-canonical_RBP
ENSG00000134982	APC	324	DP2|DP3|DP2.5|PPP1R46	APC regulator of WNT signaling pathway	Non-canonical_RBP
ENSG00000134987	WDR36	134430	TA-WDRP|UTP21|GLC1G	WD repeat domain 36	Utp21
ENSG00000135046	ANXA1	301	ANX1|LPC1	annexin A1	Non-canonical_RBP
ENSG00000135090	TAOK3	51347	JIK|DPK|MAP3K18	TAO kinase 3	Non-canonical_RBP
ENSG00000135097	MSI1	4440	N	musashi RNA binding protein 1	RRM_1
ENSG00000135114	OASL	8638	TRIP14|p59OASL|OASL1	2'-5'-oligoadenylate synthetase like	OAS1_C
ENSG00000135250	SRPK2	6733	SFRSK2	SRSF protein kinase 2	Non-canonical_RBP
ENSG00000135297	MTO1	25821	N	mitochondrial tRNA translation optimization 1	GIDA_assoc
ENSG00000135316	SYNCRIP	10492	NSAP1|GRY-RBP|dJ3J17.2|HNRPQ1|hnRNP-Q|HNRNPQ	synaptotagmin binding cytoplasmic RNA interacting protein	RRM_1
ENSG00000135372	NAT10	55226	hALP|FLJ10774|FLJ12179|NET43|KIAA1709|Kre33	N-acetyltransferase 10	tRNA_bind_2
ENSG00000135387	CAPRIN1	4076	caprin-1|RNG105|M11S1|GPIAP1	cell cycle associated protein 1	Caprin-1_C
ENSG00000135446	CDK4	1019	PSK-J3	cyclin dependent kinase 4	Non-canonical_RBP
ENSG00000135476	ESPL1	9700	KIAA0165|ESP1|SEPA	extra spindle pole bodies like 1, separase	Non-canonical_RBP
ENSG00000135482	ZC3H10	84872	FLJ14451|ZC3HDC10	zinc finger CCCH-type containing 10	zf-CCCH
ENSG00000135486	HNRNPA1	3178	hnRNPA1|hnRNP-A1|ALS20|HNRPA1	heterogeneous nuclear ribonucleoprotein A1	RRM_1
ENSG00000135521	LTV1	84946	FLJ14909|dJ468K18.4|C6orf93	LTV1 ribosome biogenesis factor	Non-canonical_RBP
ENSG00000135587	SMPD2	6610	nSMase|ISC1	sphingomyelin phosphodiesterase 2	Exo_endo_phos
ENSG00000135624	CCT7	10574	Ccth|Nip7-1	chaperonin containing TCP1 subunit 7	Non-canonical_RBP
ENSG00000135679	MDM2	4193	HDM2|MGC5370	MDM2 proto-oncogene	zf-RanBP
ENSG00000135698	MPHOSPH6	10200	MPP6	M-phase phosphoprotein 6	MPP6
ENSG00000135720	DYNC1LI2	1783	DNCLI2	dynein cytoplasmic 1 light intermediate chain 2	Non-canonical_RBP
ENSG00000135723	FHOD1	29109	FHOS	formin homology 2 domain containing 1	Non-canonical_RBP
ENSG00000135763	URB2	9816	NPA2|NET10|KIAA0133	URB2 ribosome biogenesis homolog	Urb2
ENSG00000135778	NTPCR	84284	MGC13186|HCR-NTPase|THEP1|C1orf57	nucleoside-triphosphatase, cancer-related	Non-canonical_RBP
ENSG00000135828	RNASEL	6041	RNS4|PRCA1	ribonuclease L	Ribonuc_2-5A
ENSG00000135829	DHX9	1660	RHA|LKP|DDX9	DExH-box helicase 9	dsrm
ENSG00000135837	CEP350	9857	KIAA0480|CAP350	centrosomal protein 350	Non-canonical_RBP
ENSG00000135870	RC3H1	149041	KIAA2025|roquin|RP5-1198E17.5|RNF198	ring finger and CCCH-type domains 1	zf-CCCH
ENSG00000135900	MRPL44	65080	FLJ12701|FLJ13990	mitochondrial ribosomal protein L44	Non-canonical_RBP
ENSG00000135930	EIF4E2	9470	IF4e|4EHP|EIF4EL3	eukaryotic translation initiation factor 4E family member 2	IF4E
ENSG00000135968	GCC2	9648	GCC185|KIAA0336	GRIP and coiled-coil domain containing 2	Non-canonical_RBP
ENSG00000135972	MRPS9	64965	RPMS9|MRP-S9|S9mt	mitochondrial ribosomal protein S9	Ribosomal_S9
ENSG00000136026	CKAP4	10970	P63|CLIMP-63|ERGIC-63	cytoskeleton associated protein 4	Non-canonical_RBP
ENSG00000136068	FLNB	2317	TAP|TABP|ABP-278|FH1|FLN1L|LRS1	filamin B	Non-canonical_RBP
ENSG00000136104	RNASEH2B	79621	FLJ11712|DLEU8|AGS2	ribonuclease H2 subunit B	RNase_H2-Ydr279
ENSG00000136108	CKAP2	26586	LB1|FLJ10749|se20-10|TMAP	cytoskeleton associated protein 2	Non-canonical_RBP
ENSG00000136111	TBC1D4	9882	KIAA0603|AS160|DKFZp779C0666	TBC1 domain family member 4	Non-canonical_RBP
ENSG00000136153	LMO7	4008	FBX20|KIAA0858|FBXO20	LIM domain 7	Non-canonical_RBP
ENSG00000136169	SETDB2	83852	CLLD8|CLLL8|KMT1F|C13orf4	SET domain bifurcated histone lysine methyltransferase 2	MBD
ENSG00000136231	IGF2BP3	10643	IMP-3|CT98|IMP3	insulin like growth factor 2 mRNA binding protein 3	KH_1
ENSG00000136243	NUPL2	11097	NLP_1|CG1|hCG1|H_RG271G13.9	nucleoporin like 2	Non-canonical_RBP
ENSG00000136261	BZW2	28969	HSPC028|MST017|MSTP017	basic leucine zipper and W2 domains 2	W2
ENSG00000136270	TBRG4	9238	Cpr2|KIAA0948|H_TD2522F11.8|FASTKD4	transforming growth factor beta regulator 4	RAP
ENSG00000136271	DDX56	54606	NOH61	DEAD-box helicase 56	DEAD
ENSG00000136279	DBNL	28988	SH3P7|HIP-55|ABP1	drebrin like	Non-canonical_RBP
ENSG00000136381	IREB2	3658	IRP2	iron responsive element binding protein 2	Aconitase
ENSG00000136448	NMT1	4836	NMT	N-myristoyltransferase 1	Non-canonical_RBP
ENSG00000136450	SRSF1	6426	ASF|SF2|SRp30a|SF2p33|MGC5228|SFRS1	serine and arginine rich splicing factor 1	RRM_1
ENSG00000136463	TACO1	51204	CCDC44	translational activator of cytochrome c oxidase I	Non-canonical_RBP
ENSG00000136522	MRPL47	57129	CGI-204|NCM1	mitochondrial ribosomal protein L47	MRP-L47
ENSG00000136527	TRA2B	6434	Htra2-beta|PPP1R156|SFRS10	transformer 2 beta homolog	RRM_1
ENSG00000136628	EPRS	2058	EARS|PARS|GLUPRORS|QPRS|QARS	glutamyl-prolyl-tRNA synthetase	tRNA-synt_1c
ENSG00000136699	SMPD4	55627	FLJ20297|FLJ20756|nSMase-3|KIAA1418|NSMASE3|NET13	sphingomyelin phosphodiesterase 4	Non-canonical_RBP
ENSG00000136709	WDR33	55339	FLJ11294|WDC146|NET14	WD repeat domain 33	Non-canonical_RBP
ENSG00000136770	DNAJC1	64215	DNAJL1|ERdj1|MTJ1	DnaJ heat shock protein family (Hsp40) member C1	Non-canonical_RBP
ENSG00000136807	CDK9	1025	PITALRE|C-2k|TAK|CDC2L4	cyclin dependent kinase 9	Non-canonical_RBP
ENSG00000136810	TXN	7295	TRX	thioredoxin	Non-canonical_RBP
ENSG00000136811	ODF2	4957	ODF84|CT134	outer dense fiber of sperm tails 2	Non-canonical_RBP
ENSG00000136813	ECPAS	23392	FLJ22036|ECM29|KIAA0368	Ecm29 proteasome adaptor and scaffold	Non-canonical_RBP
ENSG00000136824	SMC2	10592	hCAP-E|CAP-E|SMC2L1	structural maintenance of chromosomes 2	Non-canonical_RBP
ENSG00000136830	FAM129B	64855	DKFZP434H0820|FLJ13518|FLJ22151|FLJ22298|bA356B19.6|MINERVA|C9orf88	family with sequence similarity 129 member B	Non-canonical_RBP
ENSG00000136854	STXBP1	6812	hUNC18|MUNC18-1|UNC18|rbSec1	syntaxin binding protein 1	Non-canonical_RBP
ENSG00000136861	CDK5RAP2	55755	C48|FLJ10867|CEP215|MCPH3	CDK5 regulatory subunit associated protein 2	Non-canonical_RBP
ENSG00000136875	PRPF4	9128	Prp4p|HPRP4|HPRP4P|PRP4|SNRNP60	pre-mRNA processing factor 4	PRP4
ENSG00000136891	TEX10	54881	FLJ20287|bA208F1.2|Ipi1	testis expressed 10	Non-canonical_RBP
ENSG00000136897	MRPL50	54534	FLJ20493|MRP-L50	mitochondrial ribosomal protein L50	Ribosomal_L50
ENSG00000136931	NR5A1	2516	FTZ1|SF-1|ELP|AD4BP|hSF-1|SF1|FTZF1	nuclear receptor subfamily 5 group A member 1	Non-canonical_RBP
ENSG00000136937	NCBP1	4686	CBP80|Sto1|NCBP	nuclear cap binding protein subunit 1	MIF4G_like_2
ENSG00000136938	ANP32B	10541	SSP29|PHAPI2|APRIL	acidic nuclear phosphoprotein 32 family member B	Non-canonical_RBP
ENSG00000136942	RPL35	11224	L35	ribosomal protein L35	Ribosomal_L29
ENSG00000136960	ENPP2	5168	ATX|PD-IALPHA|PDNP2	ectonucleotide pyrophosphatase/phosphodiesterase 2	Endonuclease_NS
ENSG00000137040	RANBP6	26953	N	RAN binding protein 6	Non-canonical_RBP
ENSG00000137054	POLR1E	64425	FLJ13390|PAF53|FLJ13970|PRAF1	RNA polymerase I subunit E	RNA_pol_I_A49
ENSG00000137055	PLAA	9373	PLAP|PLA2P|FLJ11281|FLJ12699|DOA1	phospholipase A2 activating protein	Non-canonical_RBP
ENSG00000137073	UBAP2	55833	KIAA1491|bA176F3.5|FLJ22435	ubiquitin associated protein 2	Non-canonical_RBP
ENSG00000137074	APTX	54840	FLJ20157|AOA|AOA1|EAOH|EOAHA|AXA1	aprataxin	DcpS_C
ENSG00000137076	TLN1	7094	ILWEQ|TLN	talin 1	Non-canonical_RBP
ENSG00000137133	HINT2	84681	-	histidine triad nucleotide binding protein 2	DcpS_C
ENSG00000137154	RPS6	6194	S6	ribosomal protein S6	Ribosomal_S6e
ENSG00000137200	CMTR1	23070	MTr1|ISG95|KIAA0082|FTSJD2	cap methyltransferase 1	FtsJ
ENSG00000137337	MDC1	9656	NFBD1|KIAA0170|Em:AB023051.5	mediator of DNA damage checkpoint 1	Non-canonical_RBP
ENSG00000137449	CPEB2	132864	N	cytoplasmic polyadenylation element binding protein 2	RRM_1
ENSG00000137497	NUMA1	4926	N	nuclear mitotic apparatus protein 1	Non-canonical_RBP
ENSG00000137502	RAB30	27314	-	RAB30, member RAS oncogene family	MMR_HSR1
ENSG00000137513	NARS2	79731	FLJ23441|SLM5|DFNB94	asparaginyl-tRNA synthetase 2, mitochondrial	tRNA-synt_2
ENSG00000137547	MRPL15	29088	RPML7|MRP-L7|HSPC145|L15mt|MRP-L15	mitochondrial ribosomal protein L15	Ribosomal_L27A
ENSG00000137574	TGS1	96764	PIMT|NCOA6IP	trimethylguanosine synthase 1	Methyltransf_15
ENSG00000137628	DDX60	55601	FLJ20035	DExD/H-box helicase 60	DEAD
ENSG00000137656	BUD13	84811	MGC13125|fSAP71|Cwc26	BUD13 homolog	Bud13
ENSG00000137710	RDX	5962	DFNB24	radixin	Non-canonical_RBP
ENSG00000137713	PPP2R1B	5519	PR65B|PP2A-Abeta	protein phosphatase 2 scaffold subunit Abeta	Non-canonical_RBP
ENSG00000137760	ALKBH8	91801	MGC10235|TRM9|TRMT9A	alkB homolog 8, tRNA methyltransferase	hmm_2OG-FeII_Oxy_2
ENSG00000137776	SLTM	79811	Met|FLJ13213	SAFB like transcription modulator	RRM_1
ENSG00000137802	MAPKBP1	23005	KIAA0596	mitogen-activated protein kinase binding protein 1	eIF2A
ENSG00000137804	NUSAP1	51203	FLJ13421|LNP|ANKT|NuSAP1|SAPL|BM037|PRO0310p1|Q0310	nucleolar and spindle associated protein 1	Non-canonical_RBP
ENSG00000137807	KIF23	9493	MKLP1|MKLP-1|KNSL5	kinesin family member 23	Non-canonical_RBP
ENSG00000137815	RTF1	23168	KIAA0252	RTF1 homolog, Paf1/RNA polymerase II complex component	Non-canonical_RBP
ENSG00000137817	PARP6	56965	pART17	poly(ADP-ribose) polymerase family member 6	PARP
ENSG00000137818	RPLP1	6176	LP1	ribosomal protein lateral stalk subunit P1	Ribosomal_60s
ENSG00000137876	RSL24D1	51187	HRP-L30-iso|L30|RPL24L|RPL24|C15orf15	ribosomal L24 domain containing 1	Ribosomal_L24e
ENSG00000137947	GTF2B	2959	TFIIB	general transcription factor IIB	Non-canonical_RBP
ENSG00000137959	IFI44L	10964	GS3686|C1orf29	interferon induced protein 44 like	MMR_HSR1
ENSG00000137996	RTCA	8634	RPC|RTC1|RTCD1	RNA 3'-terminal phosphate cyclase	RTC
ENSG00000138029	HADHB	3032	MTPB	hydroxyacyl-CoA dehydrogenase trifunctional multienzyme complex subunit beta	Non-canonical_RBP
ENSG00000138035	PNPT1	87178	PNPase|OLD35|old-35|DFNB70	polyribonucleotide nucleotidyltransferase 1	RNase_PH
ENSG00000138050	THUMPD2	80745	MGC2454|C2orf8	THUMP domain containing 2	UPF0020
ENSG00000138069	RAB1A	5861	YPT1|RAB1	RAB1A, member RAS oncogene family	MMR_HSR1
ENSG00000138073	PREB	10113	SEC12	prolactin regulatory element binding	Non-canonical_RBP
ENSG00000138095	LRPPRC	10128	GP130|LRP130|LSFC	leucine rich pentatricopeptide repeat containing	PPR
ENSG00000138119	MYOF	26509	KIAA1207|FER1L3	myoferlin	Non-canonical_RBP
ENSG00000138160	KIF11	3832	Eg5|HKSP|TRIP5|KNSL1	kinesin family member 11	Non-canonical_RBP
ENSG00000138175	ARL3	403	ARFL3	ADP ribosylation factor like GTPase 3	MMR_HSR1
ENSG00000138180	CEP55	55165	FLJ10540|CT111|C10orf3	centrosomal protein 55	Non-canonical_RBP
ENSG00000138231	DBR1	51163	N	debranching RNA lariats 1	DBR1
ENSG00000138246	DNAJC13	23317	RME8|KIAA0678	DnaJ heat shock protein family (Hsp40) member C13	Non-canonical_RBP
ENSG00000138279	ANXA7	310	ANX7	annexin A7	Non-canonical_RBP
ENSG00000138303	ASCC1	51008	CGI-18|ASC1p50|Em:AC022392.3	activating signal cointegrator 1 complex subunit 1	AKAP7_NLS
ENSG00000138326	RPS24	6229	S24|eS24	ribosomal protein S24	Ribosomal_S24e
ENSG00000138363	ATIC	471	PURH|AICARFT|IMPCHASE	5-aminoimidazole-4-carboxamide ribonucleotide formyltransferase/IMP cyclohydrolase	Non-canonical_RBP
ENSG00000138375	SMARCAL1	50485	HHARP|HARP	SWI/SNF related, matrix associated, actin dependent regulator of chromatin, subfamily a like 1	ResIII
ENSG00000138382	METTL5	29081	HSPC133	methyltransferase like 5	MTS
ENSG00000138385	SSB	6741	LARP3|La|La/SSB	small RNA binding exonuclease protection factor La	RRM_3
ENSG00000138398	PPIG	9360	CARS-Cyp|SRCyp|SCAF10	peptidylprolyl isomerase G	Non-canonical_RBP
ENSG00000138399	FASTKD1	79675	FLJ21901	FAST kinase domains 1	RAP
ENSG00000138430	OLA1	29789	PTD004|GTPBP9	Obg like ATPase 1	MMR_HSR1
ENSG00000138434	ITPRID2	6744	CS-1|SPAG13|KRAP|KIAA1927|SSFA2	ITPR interacting domain containing 2	Non-canonical_RBP
ENSG00000138592	USP8	9101	HumORF8|KIAA0055|UBPY|SPG59	ubiquitin specific peptidase 8	Non-canonical_RBP
ENSG00000138593	SECISBP2L	9728	KIAA0256	SECIS binding protein 2 like	Ribosomal_L7Ae
ENSG00000138617	PARP16	54956	FLJ20509|FLJ25281|pART15|C15orf30	poly(ADP-ribose) polymerase family member 16	PARP
ENSG00000138646	HERC5	51191	CEB1	HECT and RLD domain containing E3 ubiquitin protein ligase 5	Non-canonical_RBP
ENSG00000138663	COPS4	51138	CSN4	COP9 signalosome subunit 4	Non-canonical_RBP
ENSG00000138668	HNRNPD	3184	AUF1|HNRPD	heterogeneous nuclear ribonucleoprotein D	RRM_1
ENSG00000138674	SEC31A	22872	KIAA0905|ABP125|ABP130|SEC31L1	SEC31 homolog A, COPII coat complex component	Non-canonical_RBP
ENSG00000138709	LARP1B	55132	FLJ10378|DKFZp434K245|DKFZp686E0316|LARP2	La ribonucleoprotein domain family member 1B	La
ENSG00000138738	PRDM5	11107	PFM2	PR/SET domain 5	zf-C2H2
ENSG00000138757	G3BP2	9908	KIAA0660	G3BP stress granule assembly factor 2	NTF2
ENSG00000138758	44450	55752	FLJ10849	septin 11	MMR_HSR1
ENSG00000138767	CNOT6L	246175	DKFZp434K098|Ccr4b	CCR4-NOT transcription complex subunit 6 like	Exo_endo_phos
ENSG00000138768	USO1	8615	TAP|VDP|p115	USO1 vesicle transport factor	Non-canonical_RBP
ENSG00000138772	ANXA3	306	ANX3	annexin A3	Non-canonical_RBP
ENSG00000138778	CENPE	1062	KIF10|PPP1R61	centromere protein E	Non-canonical_RBP
ENSG00000138780	GSTCD	79807	FLJ13273	glutathione S-transferase C-terminal domain containing	Methyltransf_31
ENSG00000138801	PAPSS1	9061	ATPSK1|PAPSS	3'-phosphoadenosine 5'-phosphosulfate synthase 1	Non-canonical_RBP
ENSG00000138802	SEC24B	10427	N	SEC24 homolog B, COPII coat complex component	Non-canonical_RBP
ENSG00000139131	YARS2	51067	FLJ13995|CGI-04|mt-TyrRS	tyrosyl-tRNA synthetase 2	tRNA-synt_1b
ENSG00000139160	ETFBKMT	254013	DKFZp451L235|MGC50559|C12orf72|METTL20	electron transfer flavoprotein subunit beta lysine methyltransferase	Met_10
ENSG00000139168	ZCRB1	85437	MADP-1|MADP1|RBM36|ZCCHC19|SNRNP31	zinc finger CCHC-type and RNA binding motif containing 1	RRM_1
ENSG00000139218	SCAF11	9169	SIP1|SRRP129|CASP11|SFRS2IP|SRSF2IP	SR-related CTD associated factor 11	Non-canonical_RBP
ENSG00000139233	LLPH	84298	MGC14817|hLLP|C12orf31	LLP homolog, long-term synaptic facilitation factor	Non-canonical_RBP
ENSG00000139323	POC1B	282809	TUWD12|FLJ14923|WDR51B	POC1 centriolar protein B	eIF2A
ENSG00000139343	SNRPF	6636	Sm-F	small nuclear ribonucleoprotein polypeptide F	LSM
ENSG00000139546	TARBP2	6895	Trbp	TARBP2 subunit of RISC loading complex	dsrm
ENSG00000139579	NABP2	79035	MGC2731|SSB1|hSSB1|SOSS-B1|OBFC2B	nucleic acid binding protein 2	tRNA_anti-codon
ENSG00000139613	SMARCC2	6601	BAF170|Rsc8|CRACC2	SWI/SNF related, matrix associated, actin dependent regulator of chromatin subfamily c member 2	Non-canonical_RBP
ENSG00000139637	C12orf10	60314	MYG|MYG1|Gamm1	chromosome 12 open reading frame 10	Non-canonical_RBP
ENSG00000139641	ESYT1	23344	MBC2|KIAA0747|FAM62A	extended synaptotagmin 1	Non-canonical_RBP
ENSG00000139675	HNRNPA1L2	144983	LOC144983	heterogeneous nuclear ribonucleoprotein A1 like 2	RRM_1
ENSG00000139697	SBNO1	55206	MOP3|FLJ10701|FLJ10833|Sno	strawberry notch homolog 1	ResIII
ENSG00000139718	SETD1B	23067	KIAA1076|Set1B|KMT2G	SET domain containing 1B, histone lysine methyltransferase	RRM_1
ENSG00000139726	DENR	8562	DRP|DRP1|SMAP-3	density regulated re-initiation and release factor	SUI1
ENSG00000139746	RBM26	64062	PRO1777|SE70-2|FLJ20957|ZC3H17|ARRS2|PPP1R132|C13orf10	RNA binding motif protein 26	PWI
ENSG00000139767	SRRM4	84530	nSR100|KIAA1853	serine/arginine repetitive matrix 4	SRRM_C
ENSG00000139793	MBNL2	10150	MBLL|MBLL39	muscleblind like splicing regulator 2	zf-CCCH
ENSG00000139797	RNF113B	140432	RNF161|ZNF183L1	ring finger protein 113B	zf-CCCH
ENSG00000139910	NOVA1	4857	N	NOVA alternative splicing regulator 1	KH_1
ENSG00000139998	RAB15	376267	-	RAB15, member RAS oncogene family	MMR_HSR1
ENSG00000140105	WARS	7453	IFP53|IFI53	tryptophanyl-tRNA synthetase	tRNA-synt_1b
ENSG00000140259	MFAP1	4236	AMP	microfibril associated protein 1	Non-canonical_RBP
ENSG00000140319	SRP14	6727	ALURBP|MGC14326	signal recognition particle 14	SRP14
ENSG00000140350	ANP32A	8125	LANP|PP32|I1PP2A|PHAPI|MAPM|mapmodulin|C15orf1	acidic nuclear phosphoprotein 32 family member A	Non-canonical_RBP
ENSG00000140374	ETFA	2108	GA2|EMA|MADD	electron transfer flavoprotein subunit alpha	Non-canonical_RBP
ENSG00000140386	SCAPER	49855	Zfp291|ZNF291	S-phase cyclin A associated protein in the ER	zf-met
ENSG00000140395	WDR61	80349	REC14	WD repeat domain 61	eIF2A
ENSG00000140464	PML	5371	MYL|TRIM19|RNF71	promyelocytic leukemia	Non-canonical_RBP
ENSG00000140488	CELF6	60677	BRUNOL6	CUGBP Elav-like family member 6	RRM_1
ENSG00000140525	FANCI	55215	FLJ10719|KIAA1794	FA complementation group I	Non-canonical_RBP
ENSG00000140553	UNC45A	55898	SMAP-1|GC-UNC45	unc-45 myosin chaperone A	Non-canonical_RBP
ENSG00000140575	IQGAP1	8826	p195|KIAA0051|SAR1|HUMORFA01	IQ motif containing GTPase activating protein 1	Non-canonical_RBP
ENSG00000140598	EFL1	79631	FLJ13119|FAM42A|HsT19294|RIA1|EFTUD1	elongation factor like GTPase 1	GTP_EFTU
ENSG00000140623	44451	124404	FLJ25410	septin 12	MMR_HSR1
ENSG00000140694	PARN	5073	DAN	poly(A)-specific ribonuclease	CAF1
ENSG00000140718	FTO	79068	KIAA1752|MGC5149|ALKBH9	FTO alpha-ketoglutarate dependent dioxygenase	FTO_NTD
ENSG00000140829	DHX38	9785	PRP16|KIAA0224|hPrp16|PRPF16|DDX38	DEAH-box helicase 38	HA2
ENSG00000140836	ZFHX3	463	ZNF927|ATBF1	zinc finger homeobox 3	zf-C2H2
ENSG00000140948	ZCCHC14	23174	BDG29|MGC14139	zinc finger CCHC-type containing 14	zf-CCHC
ENSG00000140955	ADAD2	161931	TENRL|FLJ00337	adenosine deaminase domain containing 2	A_deamin
ENSG00000140986	RPL3L	6123	N	ribosomal protein L3 like	Ribosomal_L3
ENSG00000140988	RPS2	6187	LLREP3|S2	ribosomal protein S2	Ribosomal_S5
ENSG00000141002	TCF25	22980	Nulp1|KIAA1049	transcription factor 25	Non-canonical_RBP
ENSG00000141027	NCOR1	9611	N-CoR|hCIT529I10|TRAC1|hN-CoR|KIAA1047|MGC104216|PPP1R109	nuclear receptor corepressor 1	Non-canonical_RBP
ENSG00000141030	COPS3	8533	SGN3|CSN3	COP9 signalosome subunit 3	Non-canonical_RBP
ENSG00000141052	MYOCD	93649	MYCD	myocardin	SAP
ENSG00000141076	UTP4	84916	NAIC|FLJ14728|KIAA1988|TEX292|CIRHIN|CIRH1A	UTP4 small subunit processome component	Non-canonical_RBP
ENSG00000141101	NOB1	28987	NOB1P|ART-4|MST158|PSMD8BP1	NIN1 (RPN12) binding protein 1 homolog	NOB1_Zn_bind
ENSG00000141279	NPEPPS	9520	PSA|MP100	aminopeptidase puromycin sensitive	Non-canonical_RBP
ENSG00000141367	CLTC	1213	Hc|CLTCL2	clathrin heavy chain	Non-canonical_RBP
ENSG00000141378	PTRH2	51651	BIT1|CGI-147|PTH2|CFAP37	peptidyl-tRNA hydrolase 2	PTH2
ENSG00000141425	RPRD1A	55197	P15RS|FLJ10656|HsT3101	regulation of nuclear pre-mRNA domain containing 1A	Non-canonical_RBP
ENSG00000141428	C18orf21	83608	PNAS-131|PNAS-124|HsT3108	chromosome 18 open reading frame 21	Non-canonical_RBP
ENSG00000141431	ASXL3	80816	KIAA1713	ASXL transcriptional regulator 3	HARE-HTH
ENSG00000141456	PELP1	27043	MNAR	proline, glutamate and leucine rich protein 1	RIX1
ENSG00000141522	ARHGDIA	396	RHOGDI|GDIA1	Rho GDP dissociation inhibitor alpha	Non-canonical_RBP
ENSG00000141543	EIF4A3	9775	KIAA0111|EIF4AIII|Fal1|DDX48	eukaryotic translation initiation factor 4A3	DEAD
ENSG00000141556	TBCD	6904	N	tubulin folding cofactor D	Non-canonical_RBP
ENSG00000141564	RPTOR	57521	KOG1|Mip1|KIAA1303|raptor	regulatory associated protein of MTOR complex 1	Non-canonical_RBP
ENSG00000141577	CEP131	22994	AZ1|KIAA1118|AZI1	centrosomal protein 131	Non-canonical_RBP
ENSG00000141642	ELAC1	55520	D29	elaC ribonuclease Z 1	Lactamase_B
ENSG00000141644	MBD1	4152	PCM1|CXXC3	methyl-CpG binding domain protein 1	MBD
ENSG00000141664	ZCCHC2	54877	FLJ20281|KIAA1744|FLJ20222|C18orf49	zinc finger CCHC-type containing 2	zf-CCHC
ENSG00000141867	BRD4	23476	HUNKI|MCAP|CAP|HUNK1	bromodomain containing 4	Non-canonical_RBP
ENSG00000141994	DUS3L	56931	DUS3|FLJ13896	dihydrouridine synthase 3 like	Dus
ENSG00000142149	HUNK	30811	-	hormonally up-regulated Neu-associated kinase	RIO1
ENSG00000142186	SCYL1	57410	HT019|P105|GKLP|NKTL|TAPK|TRAP|TEIF|MGC78454|NTKL	SCY1 like pseudokinase 1	Non-canonical_RBP
ENSG00000142207	URB1	9875	KIAA0539|NPA1|C21orf108	URB1 ribosome biogenesis homolog	Npa1
ENSG00000142230	SAE1	10055	AOS1|FLJ3091|Sua1	SUMO1 activating enzyme subunit 1	Non-canonical_RBP
ENSG00000142252	GEMIN7	79760	FLJ13956	gem nuclear organelle associated protein 7	Gemin7
ENSG00000142453	CARM1	10498	PRMT4	coactivator associated arginine methyltransferase 1	MTS
ENSG00000142534	RPS11	6205	S11	ribosomal protein S11	Ribosomal_S17
ENSG00000142541	RPL13A	23521	L13A|TSTA1	ribosomal protein L13a	Ribosomal_L13
ENSG00000142546	NOSIP	51070	CGI-25	nitric oxide synthase interacting protein	Non-canonical_RBP
ENSG00000142657	PGD	5226	N	phosphogluconate dehydrogenase	Non-canonical_RBP
ENSG00000142676	RPL11	6135	L11|uL5	ribosomal protein L11	Ribosomal_L5
ENSG00000142684	ZNF593	51042	ZT86	zinc finger protein 593	zf-C2H2_jaz
ENSG00000142864	SERBP1	26135	PAI-RBP1|DKFZP564M2423|CGI-55|HABP4L|PAIRBP1|CHD3IP	SERPINE1 mRNA binding protein 1	HABP4_PAI-RBP1
ENSG00000142937	RPS8	6202	S8	ribosomal protein S8	Ribosomal_S8e
ENSG00000142945	KIF2C	11004	MCAK|CT139|KNSL6	kinesin family member 2C	Non-canonical_RBP
ENSG00000143149	ALDH9A1	223	E3|ALDH7|ALDH4|ALDH9	aldehyde dehydrogenase 9 family member A1	Non-canonical_RBP
ENSG00000143194	MAEL	84944	FLJ14904|CT128|SPATA35	maelstrom spermatogenic transposon silencer	Maelstrom
ENSG00000143314	MRPL24	79590	MRP-L18	mitochondrial ribosomal protein L24	KOW
ENSG00000143319	ISG20L2	81875	FLJ12671	interferon stimulated exonuclease gene 20 like 2	RNase_T
ENSG00000143321	HDGF	3068	HMG1L2	heparin binding growth factor	Non-canonical_RBP
ENSG00000143368	SF3B4	10262	SAP49|SF3b49|Hsh49	splicing factor 3b subunit 4	RRM_1
ENSG00000143373	ZNF687	57592	KIAA1441	zinc finger protein 687	zf-C2H2
ENSG00000143374	TARS2	80222	FLJ12528|TARSL1	threonyl-tRNA synthetase 2, mitochondrial	tRNA-synt_2b
ENSG00000143379	SETDB1	9869	KG1T|KIAA0067|ESET|KMT1E|TDRD21	SET domain bifurcated histone lysine methyltransferase 1	MBD
ENSG00000143401	ANP32E	81611	LANPL|MGC5350|LANP-L	acidic nuclear phosphoprotein 32 family member E	Non-canonical_RBP
ENSG00000143436	MRPL9	65005	N	mitochondrial ribosomal protein L9	Ribosomal_L9_N
ENSG00000143442	POGZ	23126	KIAA0461|ZNF635m|ZNF280E	pogo transposable element derived with ZNF domain	Non-canonical_RBP
ENSG00000143486	EIF2D	1939	LGTN	eukaryotic translation initiation factor 2D	SUI1
ENSG00000143514	TP53BP2	7159	PPP1R13A|ASPP2|53BP2	tumor protein p53 binding protein 2	Non-canonical_RBP
ENSG00000143545	RAB13	5872	-	RAB13, member RAS oncogene family	MMR_HSR1
ENSG00000143569	UBAP2L	9898	NICE-4|KIAA0144	ubiquitin associated protein 2 like	Non-canonical_RBP
ENSG00000143614	GATAD2B	57459	P66beta	GATA zinc finger domain containing 2B	Non-canonical_RBP
ENSG00000143621	ILF2	3608	NF45	interleukin enhancer binding factor 2	DZF
ENSG00000143624	INTS3	65123	FLJ21919|INT3|SOSS-A|C1orf60	integrator complex subunit 3	Ints3
ENSG00000143633	C1orf131	128061	DKFZp547B1713	chromosome 1 open reading frame 131	Non-canonical_RBP
ENSG00000143641	GALNT2	2590	GalNAc-T2	polypeptide N-acetylgalactosaminyltransferase 2	Non-canonical_RBP
ENSG00000143702	CEP170	9859	KAB|FAM68A|KIAA0470	centrosomal protein 170	Non-canonical_RBP
ENSG00000143727	ACP1	52	HAAP|LMW-PTP|LMWPTP	acid phosphatase 1	Non-canonical_RBP
ENSG00000143742	SRP9	6726	N	signal recognition particle 9	SRP9-21
ENSG00000143748	NVL	4931	NVL2	nuclear VCP like	Non-canonical_RBP
ENSG00000143751	SDE2	163859	FLJ35382|C1orf55	SDE2 telomere maintenance homolog	Non-canonical_RBP
ENSG00000143761	ARF1	375	N	ADP ribosylation factor 1	MMR_HSR1
ENSG00000143776	CDC42BPA	8476	MRCKA|PK428|FLJ23347|KIAA0451|MRCK	CDC42 binding protein kinase alpha	Non-canonical_RBP
ENSG00000143793	C1orf35	79169	MGC4174|MMTAG2	chromosome 1 open reading frame 35	Non-canonical_RBP
ENSG00000143799	PARP1	142	PARP|PPOL|ADPRT	poly(ADP-ribose) polymerase 1	PARP
ENSG00000143815	LBR	3930	DHCR14B|TDRD18	lamin B receptor	Non-canonical_RBP
ENSG00000143862	ARL8A	127829	FLJ45195|Gie2|ARL10B	ADP ribosylation factor like GTPase 8A	MMR_HSR1
ENSG00000143870	PDIA6	10130	P5|ERp5|TXNDC7	protein disulfide isomerase family A member 6	Non-canonical_RBP
ENSG00000143889	HNRNPLL	92906	HNRPLL	heterogeneous nuclear ribonucleoprotein L like	RRM_5
ENSG00000143924	EML4	27436	ROPP120|ELP120|C2orf2	EMAP like 4	Non-canonical_RBP
ENSG00000143947	RPS27A	6233	UBCEP80|Uba80|S27A	ribosomal protein S27a	Ribosomal_S27
ENSG00000143970	ASXL2	55252	ASXH2|FLJ10898|KIAA1685	ASXL transcriptional regulator 2	HARE-HTH
ENSG00000143977	SNRPG	6637	Sm-G	small nuclear ribonucleoprotein polypeptide G	LSM
ENSG00000144028	SNRNP200	23020	U5-200KD|HELIC2|KIAA0788|BRR2|ASCC3L1|RP33	small nuclear ribonucleoprotein U5 subunit 200	DEAD
ENSG00000144029	MRPS5	64969	MRP-S5|S5mt	mitochondrial ribosomal protein S5	Ribosomal_S5_C
ENSG00000144045	DQX1	165545	FLJ23757	DEAQ-box RNA dependent ATPase 1	HA2
ENSG00000144048	DUSP11	8446	PIR1	dual specificity phosphatase 11	Non-canonical_RBP
ENSG00000144134	RABL2A	11159	-	RAB, member of RAS oncogene family like 2A	MMR_HSR1
ENSG00000144161	ZC3H8	84524	Fliz1|ZC3HDC8	zinc finger CCCH-type containing 8	zf-CCCH
ENSG00000144218	AFF3	3899	MLLT2-like|LAF4	AF4/FMR2 family member 3	AF-4
ENSG00000144231	POLR2D	5433	RBP4	RNA polymerase II subunit D	RNA_pol_Rpb4
ENSG00000144331	ZNF385B	151126	FLJ25270|ZNF533	zinc finger protein 385B	zf-met
ENSG00000144381	HSPD1	3329	GroEL|HSP60|SPG13	heat shock protein family D (Hsp60) member 1	Non-canonical_RBP
ENSG00000144535	DIS3L2	129563	FLJ36974|MGC42174|FAM6A	DIS3 like 3'-5' exoribonuclease 2	RNB
ENSG00000144554	FANCD2	2177	FAD|FA-D2|FACD|FANCD	FA complementation group D2	Non-canonical_RBP
ENSG00000144566	RAB5A	5868	RAB5	RAB5A, member RAS oncogene family	MMR_HSR1
ENSG00000144635	DYNC1LI1	51143	DNCLI1	dynein cytoplasmic 1 light intermediate chain 1	Non-canonical_RBP
ENSG00000144642	RBMS3	27303	N	RNA binding motif single stranded interacting protein 3	RRM_1
ENSG00000144713	RPL32	6161	L32	ribosomal protein L32	Ribosomal_L32e
ENSG00000144724	PTPRG	5793	RPTPG|PTPG	protein tyrosine phosphatase receptor type G	Non-canonical_RBP
ENSG00000144736	SHQ1	55164	FLJ10539|Shq1p	SHQ1, H/ACA ribonucleoprotein assembly factor	SHQ1
ENSG00000144791	LIMD1	8994	N	LIM domains containing 1	Non-canonical_RBP
ENSG00000144840	RABL3	285282	MGC23920	RAB, member of RAS oncogene family like 3	MMR_HSR1
ENSG00000144867	SRPRB	58477	APMCF1|SR-beta	SRP receptor subunit beta	MMR_HSR1
ENSG00000144895	EIF2A	83939	EIF-2A	eukaryotic translation initiation factor 2A	eIF2A
ENSG00000145012	LPP	4026	N	LIM domain containing preferred translocation partner in lipoma	Non-canonical_RBP
ENSG00000145041	DCAF1	9730	KIAA0800|MGC102804|VPRBP	DDB1 and CUL4 associated factor 1	Non-canonical_RBP
ENSG00000145050	MANF	7873	ARP|ARMET	mesencephalic astrocyte derived neurotrophic factor	Non-canonical_RBP
ENSG00000145191	EIF2B5	8893	EIF2Bepsilon|EIF-2B	eukaryotic translation initiation factor 2B subunit epsilon	W2
ENSG00000145216	FIP1L1	81608	DKFZp586K0717|FIP1	factor interacting with PAPOLA and CPSF1	Fip1
ENSG00000145220	LYAR	55646	ZC2HC2|ZLYAR	Ly1 antibody reactive	Non-canonical_RBP
ENSG00000145331	TRMT10A	93587	MGC27034|TRM10|RG9MTD2	tRNA methyltransferase 10A	tRNA_m1G_MT
ENSG00000145337	PYURF	100996939	PreY	PIGY upstream reading frame	Trm112p
ENSG00000145388	METTL14	57721	KIAA1627	methyltransferase like 14	MT-A70
ENSG00000145414	NAF1	92345	N	nuclear assembly factor 1 ribonucleoprotein	Gar1
ENSG00000145425	RPS3A	6189	S3A|MFTL	ribosomal protein S3A	Ribosomal_S3Ae
ENSG00000145592	RPL37	6167	L37	ribosomal protein L37	Ribosomal_L37e
ENSG00000145833	DDX46	9879	KIAA0801|FLJ25329|PRPF5|Prp5	DEAD-box helicase 46	DEAD
ENSG00000145907	G3BP1	10146	HDH-VIII|G3BP	G3BP stress granule assembly factor 1	NTF2
ENSG00000145912	NHP2	55651	FLJ20479|NOLA2	NHP2 ribonucleoprotein	Ribosomal_L7Ae
ENSG00000145982	FARS2	10667	dJ236A3.1|FARS1	phenylalanyl-tRNA synthetase 2, mitochondrial	tRNA-synt_2d
ENSG00000146007	ZMAT2	153527	FLJ31121|hSNU23|Snu23	zinc finger matrin-type 2	zf-C2H2_jaz
ENSG00000146109	ABT1	29777	Esf2	activator of basal transcription 1	Non-canonical_RBP
ENSG00000146112	PPP1R18	170954	phostensin|KIAA1949	protein phosphatase 1 regulatory subunit 18	Non-canonical_RBP
ENSG00000146143	PRIM2	5558	PRIM2A	DNA primase subunit 2	Non-canonical_RBP
ENSG00000146223	RPL7L1	285855	dJ475N16.4	ribosomal protein L7 like 1	Ribosomal_L30_N
ENSG00000146247	PHIP	55023	ndrp|FLJ20705|DCAF14|BRWD2|WDR11	pleckstrin homology domain interacting protein	Non-canonical_RBP
ENSG00000146282	RARS2	57038	MGC14993|MGC23778|PRO1992|dJ382I10.6|DALRD2|RARSL	arginyl-tRNA synthetase 2, mitochondrial	tRNA-synt_1d
ENSG00000146453	PNLDC1	154197	FLJ40240|dJ195P10.2	PARN like, ribonuclease domain containing 1	CAF1
ENSG00000146463	ZMYM4	9202	KIAA0425|ZNF198L3|MYM|ZNF262	zinc finger MYM-type containing 4	Non-canonical_RBP
ENSG00000146540	C7orf50	84310	MGC11257|YCR016W	chromosome 7 open reading frame 50	Non-canonical_RBP
ENSG00000146676	PURB	5814	PURBETA	purine rich element binding protein B	PurA
ENSG00000146701	MDH2	4191	N	malate dehydrogenase 2	Non-canonical_RBP
ENSG00000146731	CCT6A	908	TTCP20|TCPZ|Cctz|HTR3|TCP20|CCT6	chaperonin containing TCP1 subunit 6A	Non-canonical_RBP
ENSG00000146834	MEPCE	56257	FLJ20257|MePCE|BCDIN3	methylphosphate capping enzyme	Bin3
ENSG00000146909	NOM1	64434	SGD1|PPP1R113|C7orf3	nucleolar protein with MIF4G domain 1	MA3
ENSG00000146918	NCAPG2	54892	FLJ20311|MTB|CAP-G2|hCAP-G2|LUZP5	non-SMC condensin II complex subunit G2	Non-canonical_RBP
ENSG00000146963	LUC7L2	51631	CGI-74|CGI-59|H_NH0792N18.3|FLJ10657|LUC7B2|hLuc7B2	LUC7 like 2, pre-mRNA splicing factor	LUC7
ENSG00000147065	MSN	4478	N	moesin	Non-canonical_RBP
ENSG00000147130	ZMYM3	9203	ZNF198L2|DXS6673E|KIAA0385|MYM|ZNF261	zinc finger MYM-type containing 3	Non-canonical_RBP
ENSG00000147140	NONO	4841	NRB54|NMT55|P54NRB|P54|PPP1R114	non-POU domain containing octamer binding	RRM_1
ENSG00000147162	OGT	8473	O-GLCNAC|HRNT1|MGC22921|FLJ23071|OGT1	O-linked N-acetylglucosamine (GlcNAc) transferase	Non-canonical_RBP
ENSG00000147206	NXF3	56000	N	nuclear RNA export factor 3	Tap-RNA_bind
ENSG00000147231	RADX	55086	FLJ14191|FLJ10178|CXorf57	RPA1 related single stranded DNA binding protein, X-linked	Non-canonical_RBP
ENSG00000147274	RBMX	27316	RNMX|hnRNP-G|HNRNPG	RNA binding motif protein X-linked	RRM_1
ENSG00000147394	ZNF185	7739	SCELL	zinc finger protein 185 with LIM domain	Non-canonical_RBP
ENSG00000147403	RPL10	6134	NOV|QM|DXS648E|DXS648|FLJ23544|L10	ribosomal protein L10	Ribosomal_L16
ENSG00000147471	PLPBP	11212	PROSC	pyridoxal phosphate binding protein	Non-canonical_RBP
ENSG00000147586	MRPS28	28957	MRP-S28|HSPC007|MRPS35	mitochondrial ribosomal protein S28	MRP-S35
ENSG00000147592	LACTB2	51110	CGI-83	lactamase beta 2	Lactamase_B
ENSG00000147604	RPL7	6129	humL7-1|L7	ribosomal protein L7	Ribosomal_L30_N
ENSG00000147649	MTDH	92140	LYRIC|3D3|AEG-1	metadherin	Non-canonical_RBP
ENSG00000147669	POLR2K	5440	RPB10alpha	RNA polymerase II subunit K	DNA_RNApol_7kD
ENSG00000147677	EIF3H	8667	eIF3-gamma|eIF3-p40|eIF3h|EIF3S3	eukaryotic translation initiation factor 3 subunit H	Non-canonical_RBP
ENSG00000147679	UTP23	84294	MGC14595|C8orf53	UTP23 small subunit processome component	Fcf1
ENSG00000147689	FAM83A	84985	MGC14128|BJ-TSA-9	family with sequence similarity 83 member A	FAM83
ENSG00000147889	CDKN2A	1029	CDK4I|p16|INK4a|MTS1|CMM2|ARF|p19|p14|INK4|p16INK4a|p19Arf|p14ARF|CDKN2|MLM	cyclin dependent kinase inhibitor 2A	Non-canonical_RBP
ENSG00000147905	ZCCHC7	84186	FLJ22611|AIR1	zinc finger CCHC-type containing 7	zf-CCHC
ENSG00000148187	MRRF	92399	RRF	mitochondrial ribosome recycling factor	RRF
ENSG00000148291	SURF2	6835	N	surfeit 2	Non-canonical_RBP
ENSG00000148296	SURF6	6838	FLJ30322|RRP14	surfeit 6	SURF6
ENSG00000148300	REXO4	57109	hPMC2|XPMC2H	REX4 homolog, 3'-5' exonuclease	RNase_T
ENSG00000148303	RPL7A	6130	SURF3|TRUP|L7A	ribosomal protein L7a	Ribosomal_L7Ae
ENSG00000148337	CIZ1	25792	LSFR1|ZNF356	CDKN1A interacting zinc finger protein 1	zf-C2H2_jaz
ENSG00000148396	SEC16A	9919	p250|Sec16L|KIAA0310	SEC16 homolog A, endoplasmic reticulum export factor	Non-canonical_RBP
ENSG00000148498	PARD3	56288	PAR3|PARD3A|Bazooka|Baz|ASIP|PPP1R118	par-3 family cell polarity regulator	Non-canonical_RBP
ENSG00000148516	ZEB1	6935	BZP|ZEB|AREB6|NIL-2-A|Zfhep|Zfhx1a|FECD6|TCF8|PPCD3	zinc finger E-box binding homeobox 1	zf-C2H2
ENSG00000148584	A1CF	29974	ACF|ASP|ACF64|ACF65|APOBEC1CF	APOBEC1 complementation factor	RRM_1
ENSG00000148606	POLR3A	11128	RPC1|RPC155|hRPC155	RNA polymerase III subunit A	RNA_pol_Rpb1_1
ENSG00000148688	RPP30	10556	TSG15	ribonuclease P/MRP subunit p30	RNase_P_p30
ENSG00000148690	FRA10AC1	118924	C10orf4	FRA10A associated CGG repeat 1	Non-canonical_RBP
ENSG00000148730	EIF4EBP2	1979	-	eukaryotic translation initiation factor 4E binding protein 2	eIF_4EBP
ENSG00000148773	MKI67	4288	MIB-1|PPP1R105	marker of proliferation Ki-67	Non-canonical_RBP
ENSG00000148824	MTG1	92170	GTPBP7	mitochondrial ribosome associated GTPase 1	MMR_HSR1
ENSG00000148840	PPRC1	23082	PRC|KIAA0595|MGC74642	PPARG related coactivator 1	RRM_1
ENSG00000148843	PDCD11	22984	KIAA0185|ALG-4|RRP5|NFBP	programmed cell death 11	S1
ENSG00000149016	TUT1	64852	FLJ22347|FLJ22267|FLJ21850|PAPD2|TUTase|TENT1|RBM21	terminal uridylyl transferase 1, U6 snRNA-specific	PAP_assoc
ENSG00000149115	TNKS1BP1	85456	TAB182|KIAA1741|FLJ45975	tankyrase 1 binding protein 1	Non-canonical_RBP
ENSG00000149136	SSRP1	6749	FACT80	structure specific recognition protein 1	Non-canonical_RBP
ENSG00000149177	PTPRJ	5795	DEP1|HPTPeta|CD148	protein tyrosine phosphatase receptor type J	Non-canonical_RBP
ENSG00000149187	CELF1	10658	CUG-BP|hNab50|BRUNOL2|NAB50|CUGBP|NAPOR|EDEN-BP|CUGBP1	CUGBP Elav-like family member 1	RRM_1
ENSG00000149218	ENDOD1	23052	KIAA0830	endonuclease domain containing 1	Endonuclease_NS
ENSG00000149257	SERPINH1	871	HSP47|colligen|CBP1|CBP2|SERPINH2	serpin family H member 1	Non-canonical_RBP
ENSG00000149273	RPS3	6188	FLJ26283|FLJ27450|MGC87870|S3	ribosomal protein S3	Ribosomal_S3_C
ENSG00000149289	ZC3H12C	85463	KIAA1726|MCPIP3	zinc finger CCCH-type containing 12C	RNase_Zc3h12a
ENSG00000149311	ATM	472	TEL1|TELO1|ATA|ATDC|ATC|ATD	ATM serine/threonine kinase	Non-canonical_RBP
ENSG00000149313	AASDHPPT	60496	LYS5|CGI-80|AASD-PPT|ACPS	aminoadipate-semialdehyde dehydrogenase-phosphopantetheinyl transferase	Non-canonical_RBP
ENSG00000149428	HYOU1	10525	ORP150|HSP12A|Grp170	hypoxia up-regulated 1	Non-canonical_RBP
ENSG00000149480	MTA2	9219	MTA1-L1|MTA1L1	metastasis associated 1 family member 2	Non-canonical_RBP
ENSG00000149532	CPSF7	79869	FLJ12529|CFIM59	cleavage and polyadenylation specific factor 7	RRM_1
ENSG00000149577	SIDT2	51092	CGI-40	SID1 transmembrane family member 2	SID-1_RNA_chan
ENSG00000149591	TAGLN	6876	SM22|WS3-10|TAGLN1|SMCC|DKFZp686P11128	transgelin	Non-canonical_RBP
ENSG00000149657	LSM14B	149986	FT005|bA11M20.3|FLJ25473|LSM13|RAP55B|C20orf40|FAM61B	LSM family member 14B	LSM14
ENSG00000149658	YTHDF1	54915	FLJ20391|C20orf21	YTH N6-methyladenosine RNA binding protein 1	YTH
ENSG00000149743	TRPT1	83707	MGC11134	tRNA phosphotransferase 1	PTS_2-RNA
ENSG00000149782	PLCB3	5331	N	phospholipase C beta 3	Non-canonical_RBP
ENSG00000149792	MRPL49	740	NOF|NOF1|L49mt|C11orf4	mitochondrial ribosomal protein L49	Img2
ENSG00000149806	FAU	2197	RPS30|FLJ22986|Fub1|Fubi|MNSFbeta|asr1|S30	FAU ubiquitin like and ribosomal protein S30 fusion	Ribosomal_S30
ENSG00000149925	ALDOA	226	N	aldolase, fructose-bisphosphate A	Non-canonical_RBP
ENSG00000149929	HIRIP3	8479	N	HIRA interacting protein 3	Non-canonical_RBP
ENSG00000150093	ITGB1	3688	CD29|GPIIA|FNRB|MSK12|MDF2	integrin subunit beta 1	Non-canonical_RBP
ENSG00000150316	CWC15	51503	C11orf5|HSPC148|Cwf15|AD002	CWC15 spliceosome associated protein homolog	Cwf_Cwc_15
ENSG00000150459	SAP18	10284	SAP18p|2HOR0202|MGC27131	Sin3A associated protein 18	SAP18
ENSG00000150593	PDCD4	27250	H731	programmed cell death 4	MA3
ENSG00000150753	CCT5	22948	KIAA0098	chaperonin containing TCP1 subunit 5	Non-canonical_RBP
ENSG00000150768	DLAT	1737	PDC-E2|E2|DLTA	dihydrolipoamide S-acetyltransferase	Non-canonical_RBP
ENSG00000150773	PIH1D2	120379	N	PIH1 domain containing 2	PIH1
ENSG00000150990	DHX37	57647	KIAA1517|MGC4322|MGC2695|Dhr1|DDX37	DEAH-box helicase 37	HA2
ENSG00000150991	UBC	7316	N	ubiquitin C	Non-canonical_RBP
ENSG00000151014	NOCT	25819	CCR4L|Ccr4c|NOC|CCRN4L	nocturnin	Exo_endo_phos
ENSG00000151065	DCP1B	196513	FLJ31638	decapping mRNA 1B	DCP1
ENSG00000151239	TWF1	5756	A6|PTK9	twinfilin actin binding protein 1	Non-canonical_RBP
ENSG00000151247	EIF4E	1977	EIF4E1|EIF4EL1|EIF4F	eukaryotic translation initiation factor 4E	IF4E
ENSG00000151304	SRFBP1	153443	FLJ25286|p49|STRAP|BUD22|Rlb1	serum response factor binding protein 1	BUD22
ENSG00000151461	UPF2	26019	RENT2|DKFZP434D222|KIAA1408|smg-3	UPF2 regulator of nonsense mediated mRNA decay	MIF4G
ENSG00000151503	NCAPD3	23310	hCAP-D3|CAP-D3|hHCP-6|KIAA0056|FLJ42888|hcp-6	non-SMC condensin II complex subunit D3	Non-canonical_RBP
ENSG00000151576	QTRT2	79691	FLJ12960|QTRTD1	queuine tRNA-ribosyltransferase accessory subunit 2	TGT
ENSG00000151657	KIN	22944	KIN17|Rts2	Kin17 DNA and RNA binding protein	Kin17_mid
ENSG00000151789	ZNF385D	79750	FLJ22419|ZNF659	zinc finger protein 385D	zf-met
ENSG00000151806	GUF1	60558	FLJ13220	GUF1 homolog, GTPase	GTP_EFTU
ENSG00000151835	SACS	26278	ARSACS|KIAA0730|DKFZp686B15167|DNAJC29|SPAX6|PPP1R138	sacsin molecular chaperone	Non-canonical_RBP
ENSG00000151846	PABPC3	5042	PABP3|tPABP|PABPL3	poly(A) binding protein cytoplasmic 3	RRM_1
ENSG00000151883	PARP8	79668	FLJ21308|pART16	poly(ADP-ribose) polymerase family member 8	PARP
ENSG00000151914	DST	667	BP240|KIAA0728|FLJ21489|FLJ13425|FLJ32235|FLJ30627|CATX-15|BPA|MACF2|BPAG1	dystonin	Non-canonical_RBP
ENSG00000151923	TIAL1	7073	TIAR	TIA1 cytotoxic granule associated RNA binding protein like 1	RRM_1
ENSG00000151929	BAG3	9531	N	BCL2 associated athanogene 3	Non-canonical_RBP
ENSG00000151962	RBM46	166863	MGC27016|CT68	RNA binding motif protein 46	RRM_1
ENSG00000152133	GPATCH11	253635	FLJ38348|CENPY|CENP-Y|CCDC75	G-patch domain containing 11	G-patch
ENSG00000152147	GEMIN6	79833	FLJ23459	gem nuclear organelle associated protein 6	Gemin6
ENSG00000152213	ARL11	115761	ARLTS1|FLJ33930	ADP ribosylation factor like GTPase 11	MMR_HSR1
ENSG00000152234	ATP5F1A	498	ATP5A|hATP1|OMR|ORM|ATP5AL2|ATPM|ATP5A1	ATP synthase F1 subunit alpha	Non-canonical_RBP
ENSG00000152242	C18orf25	147339	MGC12909|ARKL1|RNF111L1|Ark2N	chromosome 18 open reading frame 25	Non-canonical_RBP
ENSG00000152332	UHMK1	127933	KIS|Kist	U2AF homology motif kinase 1	RRM_1
ENSG00000152404	CWF19L2	143884	FLJ32343	CWF19 like cell cycle control factor 2	CwfJ_C_1
ENSG00000152430	BOLL	66037	BOULE	boule homolog, RNA binding protein	RRM_1
ENSG00000152464	RPP38	10557	N	ribonuclease P/MRP subunit p38	Ribosomal_L7Ae
ENSG00000152518	ZFP36L2	678	ERF2|RNF162C|TIS11D|BRF2	ZFP36 ring finger protein like 2	zf-CCCH
ENSG00000152601	MBNL1	4154	KIAA0428|EXP42|EXP40|EXP35|EXP|MBNL	muscleblind like splicing regulator 1	zf-CCCH
ENSG00000152670	DDX4	54514	VASA	DEAD-box helicase 4	DEAD
ENSG00000152684	PELO	53918	N	pelota mRNA surveillance and ribosome rescue factor	eRF1_1
ENSG00000152700	SAR1B	51128	SARA2	secretion associated Ras related GTPase 1B	MMR_HSR1
ENSG00000152778	IFIT5	24138	RI58	interferon induced protein with tetratricopeptide repeats 5	Non-canonical_RBP
ENSG00000152795	HNRNPDL	9987	JKTBP|laAUF1|HNRPDL	heterogeneous nuclear ribonucleoprotein D like	RRM_1
ENSG00000152818	UTRN	7402	DRP|DRP1|DMDL	utrophin	Non-canonical_RBP
ENSG00000152952	PLOD2	5352	LH2	procollagen-lysine,2-oxoglutarate 5-dioxygenase 2	hmm_2OG-FeII_Oxy
ENSG00000152977	ZIC1	7545	ZIC|ZNF201	Zic family member 1	zf-C2H2
ENSG00000153037	SRP19	6728	N	signal recognition particle 19	SRP19
ENSG00000153048	CARHSP1	23589	CRHSP-24|CSDC1	calcium regulated heat stable protein 1	CSD
ENSG00000153107	ANAPC1	64682	MCPR|TSG24|APC1	anaphase promoting complex subunit 1	Non-canonical_RBP
ENSG00000153113	CAST	831	N	calpastatin	Non-canonical_RBP
ENSG00000153132	CLGN	1047	-	calmegin	Calreticulin
ENSG00000153147	SMARCA5	8467	hSNF2H|hISWI|ISWI	SWI/SNF related, matrix associated, actin dependent regulator of chromatin, subfamily a, member 5	ResIII
ENSG00000153187	HNRNPU	3192	SAF-A|hnRNPU|FLJ37978|FLJ30202|HNRPU|HNRNPU-AS1|C1orf199|NCRNA00201	heterogeneous nuclear ribonucleoprotein U	SAP
ENSG00000153201	RANBP2	5903	NUP358|ADANE|ANE1	RAN binding protein 2	zf-RanBP
ENSG00000153207	AHCTF1	25909	ELYS	AT-hook containing transcription factor 1	Non-canonical_RBP
ENSG00000153250	RBMS1	5937	SCR2|MSSP-1|MSSP-2|MSSP-3|YC1|HCC-4|DKFZp564H0764|C2orf12	RNA binding motif single stranded interacting protein 1	RRM_1
ENSG00000153774	CFDP1	10428	BCNT|p97|CP27|SWC5|Yeti|CENP-29	craniofacial development protein 1	Non-canonical_RBP
ENSG00000153827	TRIP12	9320	KIAA0045	thyroid hormone receptor interactor 12	Non-canonical_RBP
ENSG00000153914	SREK1	140890	DKFZp564B176|SRrp86|SRrp508|SFRS12	splicing regulatory glutamic acid and lysine rich protein 1	RRM_1
ENSG00000153922	CHD1	1105	N	chromodomain helicase DNA binding protein 1	ResIII
ENSG00000153944	MSI2	124540	N	musashi RNA binding protein 2	RRM_1
ENSG00000154269	ENPP3	5169	PD-IBETA|gp130RB13-6|B10|CD203c|PDNP3	ectonucleotide pyrophosphatase/phosphodiesterase 3	Endonuclease_NS
ENSG00000154305	MIA3	375056	UNQ6077|FLJ39207|KIAA0268|TANGO|TANGO1	MIA SH3 domain ER export factor 3	Non-canonical_RBP
ENSG00000154380	ENAH	55740	FLJ10773|NDPP1|MENA	ENAH actin regulator	Non-canonical_RBP
ENSG00000154473	BUB3	9184	BUB3L	BUB3 mitotic checkpoint protein	Non-canonical_RBP
ENSG00000154548	SRSF12	135295	SRrp35|SFRS19|SFRS13B	serine and arginine rich splicing factor 12	RRM_1
ENSG00000154719	MRPL39	54148	RPML5|MRP-L5|MGC104174|PRED66|PRED22|C21orf92|L39mt|MSTP003|MGC3400|FLJ20451	mitochondrial ribosomal protein L39	Non-canonical_RBP
ENSG00000154743	TSEN2	80746	SEN2|SEN2L|MGC2776	tRNA splicing endonuclease subunit 2	tRNA_int_endo
ENSG00000154917	RAB6B	51560	-	RAB6B, member RAS oncogene family	MMR_HSR1
ENSG00000154997	44453	346288	FLJ44060	septin 14	MMR_HSR1
ENSG00000155229	MMS19	64210	MET18|hMMS19|CIAO4|MMS19L	MMS19 homolog, cytosolic iron-sulfur assembly component	Non-canonical_RBP
ENSG00000155275	TRMT44	152992	FLJ35725|TRM44|C4orf23|METTL19	tRNA methyltransferase 44 homolog	AdoMet_MTase
ENSG00000155363	MOV10	4343	gb110|MGC2948|fSAP113	Mov10 RISC complex RNA helicase	ResIII
ENSG00000155380	SLC16A1	6566	MCT|MCT1	solute carrier family 16 member 1	Non-canonical_RBP
ENSG00000155393	HEATR3	55027	FLJ20718	HEAT repeat containing 3	Non-canonical_RBP
ENSG00000155438	NIFK	84365	Nopp34|hNIFK|MKI67IP	nucleolar protein interacting with the FHA domain of MKI67	RRM_1
ENSG00000155506	LARP1	23367	LARP|KIAA0731|MGC19556	La ribonucleoprotein domain family member 1	La
ENSG00000155508	CNOT8	9337	CAF1|hCAF1|CALIF|POP2	CCR4-NOT transcription complex subunit 8	CAF1
ENSG00000155561	NUP205	23165	KIAA0225|C7orf14	nucleoporin 205	Non-canonical_RBP
ENSG00000155636	RBM45	129831	DRB1|FLJ44612	RNA binding motif protein 45	RRM_1
ENSG00000155657	TTN	7273	CMPD4|FLJ32040|TMD|CMH9|LGMD2J|MYLK5|CMD1G	titin	Non-canonical_RBP
ENSG00000155660	PDIA4	9601	ERP70|ERP72	protein disulfide isomerase family A member 4	Non-canonical_RBP
ENSG00000155827	RNF20	56254	FLJ20382|FLJ11189|KAIA2779|BRE1A|hBRE1|BRE1	ring finger protein 20	Non-canonical_RBP
ENSG00000155846	PPARGC1B	133522	PERC|PGC1B	PPARG coactivator 1 beta	RRM_1
ENSG00000155858	LSM11	134353	FLJ38273	U7 SnRNA-Associated Sm-Like Protein LSm11	LSM
ENSG00000155876	RRAGA	10670	RAGA|FIP-1	Ras related GTP binding A	MMR_HSR1
ENSG00000155961	RAB39B	116442	MRX72|WSN	RAB39B, member RAS oncogene family	MMR_HSR1
ENSG00000155966	AFF2	2334	FRAXE|FMR2	AF4/FMR2 family member 2	AF-4
ENSG00000156239	N6AMT1	29104	PRED28|N6AMT|MTQ2|C21orf127|HEMK2	N-6 adenine-specific DNA methyltransferase 1	MTS
ENSG00000156261	CCT8	10694	Cctq|PRED71|C21orf112	chaperonin containing TCP1 subunit 8	Non-canonical_RBP
ENSG00000156304	SCAF4	57466	KIAA1172|DKFZp434E098|SRA4|SFRS15	SR-related CTD associated factor 4	RRM_1
ENSG00000156414	TDRD9	122402	DKFZp434N0820|FLJ36164|NET54|C14orf75	tudor domain containing 9	TUDOR
ENSG00000156469	MTERF3	51001	CGI-12|FLJ10939|MTERFD1	mitochondrial transcription termination factor 3	mTERF
ENSG00000156482	RPL30	6156	L30	ribosomal protein L30	Ribosomal_L7Ae
ENSG00000156502	SUPV3L1	6832	SUV3	Suv3 like RNA helicase	SUV3_C
ENSG00000156508	EEF1A1	1915	EE1A1|EF1A|EEF1A|LENG7	eukaryotic translation elongation factor 1 alpha 1	GTP_EFTU
ENSG00000156515	HK1	3098	N	hexokinase 1	Non-canonical_RBP
ENSG00000156531	PHF6	84295	KIAA1823|MGC14797|CENP-31|BFLS|BORJ	PHD finger protein 6	Non-canonical_RBP
ENSG00000156697	UTP14A	10813	NY-CO-16|Utp14|SDCCAG16	UTP14A small subunit processome component	Utp14
ENSG00000156802	ATAD2	29028	PRO2000|DKFZp667N1320|MGC5254|MGC29843|CT137|ANCCA	ATPase family AAA domain containing 2	Non-canonical_RBP
ENSG00000156925	ZIC3	7547	HTX|ZNF203|HTX1	Zic family member 3	zf-C2H2
ENSG00000156928	MALSU1	115416	mtRsfA|C7orf30	mitochondrial assembly of ribosomal large subunit 1	Non-canonical_RBP
ENSG00000156976	EIF4A2	1974	DDX2B|EIF4A|BM-010|EIF4F	eukaryotic translation initiation factor 4A2	DEAD
ENSG00000156983	BRPF1	7862	BR140	bromodomain and PHD finger containing 1	Non-canonical_RBP
ENSG00000156990	RPUSD3	285367	MGC29784	RNA pseudouridine synthase D3	PseudoU_synth_2
ENSG00000157036	EXOG	9941	ENGL-a|ENGL|ENGL-b|ENDOGL1|ENDOGL2	exo/endonuclease G	Endonuclease_NS
ENSG00000157106	SMG1	23049	LIP|KIAA0421|ATX	SMG1 nonsense mediated mRNA decay associated PI3K related kinase	Non-canonical_RBP
ENSG00000157110	RBPMS	11030	HERMES	RNA binding protein, mRNA processing factor	RRM_1
ENSG00000157349	DDX19B	11269	DBP5|DDX19	DEAD-box helicase 19B	DEAD
ENSG00000157483	MYO1E	4643	MYO1C|HuncM-IC|MGC104638	myosin IE	Non-canonical_RBP
ENSG00000158042	MRPL17	63875	RPML26|MRP-L26	mitochondrial ribosomal protein L17	Ribosomal_L17
ENSG00000158186	MRAS	22808	M-RAs|R-RAS3|RRAS3	muscle RAS oncogene homolog	GTP_EFTU
ENSG00000158195	WASF2	10163	WAVE2|SCAR2	WASP family member 2	Non-canonical_RBP
ENSG00000158246	TENT5B	115572	MGC16491|FAM46B	terminal nucleotidyltransferase 5B	NTP_transf_7
ENSG00000158290	CUL4B	8450	N	cullin 4B	Non-canonical_RBP
ENSG00000158406	HIST1H4H	8365	H4/h|H4FH	histone cluster 1 H4 family member h	Non-canonical_RBP
ENSG00000158417	EIF5B	9669	IF2|KIAA0741|DKFZp434I036|FLJ10524	eukaryotic translation initiation factor 5B	GTP_EFTU
ENSG00000158435	CNOT11	55571	C40|C2orf29	CCR4-NOT transcription complex subunit 11	CNOT11
ENSG00000158526	TSR2	90121	DT1P1A10|RP1-112K5.2|WGG1	TSR2 ribosome maturation factor	WGG
ENSG00000158545	ZC3H18	124245	NHN1	zinc finger CCCH-type containing 18	zf-CCCH
ENSG00000158710	TAGLN2	8407	KIAA0120|HA1756	transgelin 2	Non-canonical_RBP
ENSG00000158716	DUSP23	54935	FLJ20442|DUSP25	dual specificity phosphatase 23	Non-canonical_RBP
ENSG00000158806	NPM2	10361	N	nucleophosmin/nucleoplasmin 2	Nucleoplasmin
ENSG00000158941	CCAR2	57805	DBC-1|DBC1|NET35|KIAA1967	cell cycle and apoptosis regulator 2	S1-like
ENSG00000159082	SYNJ1	8867	INPP5G|PARK20	synaptojanin 1	DUF1866
ENSG00000159111	MRPL10	124995	RPML8|MRP-L8|L10MT|MRP-L10|MRPL8|MGC17973	mitochondrial ribosomal protein L10	Ribosomal_L10
ENSG00000159131	GART	2618	GARS-AIRS-GART|PRGS|PGFT	phosphoribosylglycinamide formyltransferase, phosphoribosylglycinamide synthetase, phosphoribosylaminoimidazole synthetase	Non-canonical_RBP
ENSG00000159140	SON	6651	DBP-5|NREBP|KIAA1019|BASS1|FLJ21099|FLJ33914|C21orf50	SON DNA binding protein	G-patch
ENSG00000159176	CSRP1	1465	CSRP|D1S181E|CYRP	cysteine and glycine rich protein 1	Non-canonical_RBP
ENSG00000159217	IGF2BP1	10642	IMP-1	insulin like growth factor 2 mRNA binding protein 1	KH_1
ENSG00000159352	PSMD4	5710	S5A|AF-1|AF|Rpn10	proteasome 26S subunit, non-ATPase 4	Non-canonical_RBP
ENSG00000159399	HK2	3099	N	hexokinase 2	Non-canonical_RBP
ENSG00000159409	CELF3	11189	CAGH4|BRUNOL1|ERDA4|MGC57297|TNRC4	CUGBP Elav-like family member 3	RRM_1
ENSG00000159593	NAE1	8883	ula-1|APP-BP1|APPBP1	NEDD8 activating enzyme E1 subunit 1	Non-canonical_RBP
ENSG00000159840	ZYX	7791	N	zyxin	Non-canonical_RBP
ENSG00000159915	ZNF233	353355	FLJ38032	zinc finger protein 233	zf-C2H2
ENSG00000159917	ZNF235	9310	HZF6|ANF270|ZNF270|ZFP93	zinc finger protein 235	zf-C2H2
ENSG00000160014	CALM3	808	PHKD	calmodulin 3	Non-canonical_RBP
ENSG00000160072	ATAD3B	83858	TOB3|KIAA1273	ATPase family AAA domain containing 3B	Non-canonical_RBP
ENSG00000160075	SSU72	29101	HSPC182	SSU72 homolog, RNA polymerase II CTD phosphatase	Ssu72
ENSG00000160194	NDUFV3	4731	CI-10k	NADH:ubiquinone oxidoreductase subunit V3	Non-canonical_RBP
ENSG00000160200	CBS	875	HIP4	cystathionine-beta-synthase	Non-canonical_RBP
ENSG00000160201	U2AF1	7307	U2AF35|RNU2AF1|RN|U2AFBP	U2 small nuclear RNA auxiliary factor 1	zf-CCCH
ENSG00000160208	RRP1B	23076	Nnp1|RRP1|PPP1R136|KIAA0179	ribosomal RNA processing 1B	Nop52
ENSG00000160211	G6PD	2539	G6PD1	glucose-6-phosphate dehydrogenase	Non-canonical_RBP
ENSG00000160213	CSTB	1476	CST6|PME|EPM1|STFB	cystatin B	Non-canonical_RBP
ENSG00000160214	RRP1	8568	NNP-1|Nop52|NOP52|RRP1A|D21S2056E	ribosomal RNA processing 1	Nop52
ENSG00000160256	FAM207A	85395	PRED56|C21orf70	family with sequence similarity 207 member A	Non-canonical_RBP
ENSG00000160294	MCM3AP	8888	Map80|KIAA0572|GANP|SAC3	minichromosome maintenance complex component 3 associated protein	Non-canonical_RBP
ENSG00000160299	PCNT	5116	KEN|KIAA0402|PCN|PCNTB|SCKL4|PCNT2	pericentrin	Non-canonical_RBP
ENSG00000160310	PRMT2	3275	MGC111373|HRMT1L1	protein arginine methyltransferase 2	MTS
ENSG00000160633	SAFB	6294	HET|SAFB1	scaffold attachment factor B	RRM_1
ENSG00000160679	CHTOP	26097	DKFZP547E1010|SRAG|FOP|C1orf77	chromatin target of PRMT1	Non-canonical_RBP
ENSG00000160710	ADAR	103	ADAR1|IFI4|G1P1	adenosine deaminase RNA specific	A_deamin
ENSG00000160752	FDPS	2224	N	farnesyl diphosphate synthase	Non-canonical_RBP
ENSG00000160789	LMNA	4000	HGPS|MADA|LMN1|CMD1A|LGMD1B|PRO1|LMNL1	lamin A/C	Non-canonical_RBP
ENSG00000160799	CCDC12	151903	MGC23918	coiled-coil domain containing 12	cwf18
ENSG00000160818	GPATCH4	54865	FLJ20249|DKFZP434F1735|GPATC4	G-patch domain containing 4	G-patch
ENSG00000160862	AZGP1	563	ZA2G|ZAG	alpha-2-glycoprotein 1, zinc-binding	Non-canonical_RBP
ENSG00000160917	CPSF4	10898	NAR|CPSF30	cleavage and polyadenylation specific factor 4	zf-CCCH
ENSG00000160949	TONSL	4796	IKBR|NFKBIL2	tonsoku like, DNA repair protein	Non-canonical_RBP
ENSG00000160957	RECQL4	9401	RecQ4	RecQ like helicase 4	DEAD
ENSG00000161011	SQSTM1	8878	p62|p60|p62B|A170|PDB3|OSIL	sequestosome 1	Non-canonical_RBP
ENSG00000161016	RPL8	6132	L8	ribosomal protein L8	Ribosomal_L2_C
ENSG00000161057	PSMC2	5701	MSS1|S7|Nbla10058	proteasome 26S subunit, ATPase 2	Non-canonical_RBP
ENSG00000161082	CELF5	60680	BRUNOL5	CUGBP Elav-like family member 5	RRM_1
ENSG00000161204	ABCF3	55324	EST201864	ATP binding cassette subfamily F member 3	Non-canonical_RBP
ENSG00000161265	U2AF1L4	199746	MGC33901|U2af26|U2AF1L3	U2 small nuclear RNA auxiliary factor 1 like 4	zf-CCCH
ENSG00000161547	SRSF2	6427	SC-35|SC35|PR264|SFRS2A|SFRS2	serine and arginine rich splicing factor 2	RRM_1
ENSG00000161618	ALDH16A1	126133	MGC10204	aldehyde dehydrogenase 16 family member A1	Non-canonical_RBP
ENSG00000161634	DCD	117159	AIDD|PIF|DSEP|HCAP|DCD-1	dermcidin	Non-canonical_RBP
ENSG00000161642	ZNF385A	25946	DKFZp586G1122|Hzf|ZFP385|ZNF385	zinc finger protein 385A	zf-met
ENSG00000161654	LSM12	124801	FLJ30656	LSM12 homolog	AD
ENSG00000161800	RACGAP1	29127	MgcRacGAP	Rac GTPase activating protein 1	Non-canonical_RBP
ENSG00000161813	LARP4	113251	PP13296	La ribonucleoprotein domain family member 4	La
ENSG00000161847	RAVER1	125950	KIAA1978	ribonucleoprotein, PTB binding 1	RRM_1
ENSG00000161940	BCL6B	255877	ZBTB28|BAZF|ZNF62	BCL6B transcription repressor	zf-C2H2
ENSG00000161956	SENP3	26168	DKFZP586K0919|SSP3|DKFZp762A152|SMT3IP1|Ulp1	SUMO specific peptidase 3	Non-canonical_RBP
ENSG00000161960	EIF4A1	1973	DDX2A|EIF-4A|EIF4A	eukaryotic translation initiation factor 4A1	DEAD
ENSG00000161970	RPL26	6154	L26	ribosomal protein L26	KOW
ENSG00000161980	POLR3K	51728	RPC11	RNA polymerase III subunit K	RNA_POL_M_15KD
ENSG00000162076	FLYWCH2	114984	N	FLYWCH family member 2	Non-canonical_RBP
ENSG00000162231	NXF1	10482	TAP|Mex67|DKFZp667O0311	nuclear RNA export factor 1	Tap-RNA_bind
ENSG00000162244	RPL29	6159	HIP|HUMRPL29|L29|RPL29P10	ribosomal protein L29	Ribosomal_L29e
ENSG00000162302	RPS6KA4	8986	RSK-B|MSK2	ribosomal protein S6 kinase A4	RIO1
ENSG00000162374	ELAVL4	1996	PNEM|HUD	ELAV like RNA binding protein 4	RRM_1
ENSG00000162385	MAGOH	4116	MAGOHA|MAGOH1	mago homolog, exon junction complex subunit	Mago_nashi
ENSG00000162396	PARS2	25973	DKFZp727A071	prolyl-tRNA synthetase 2, mitochondrial	tRNA-synt_2b
ENSG00000162402	USP24	23358	KIAA1057	ubiquitin specific peptidase 24	Non-canonical_RBP
ENSG00000162408	NOL9	79707	FLJ23323|NET6|Grc3	nucleolar protein 9	Non-canonical_RBP
ENSG00000162437	RAVER2	55225	KIAA1579|FLJ10770	ribonucleoprotein, PTB binding 2	RRM_1
ENSG00000162517	PEF1	553115	PEF1A	penta-EF-hand domain containing 1	Non-canonical_RBP
ENSG00000162521	RBBP4	5928	RbAp48|NURF55|lin-53	RB binding protein 4, chromatin remodeling factor	Non-canonical_RBP
ENSG00000162613	FUBP1	8880	FBP|FUBP	far upstream element binding protein 1	KH_1
ENSG00000162623	TYW3	127253	FLJ40918|C1orf171	tRNA-yW synthesizing protein 3 homolog	TYW3
ENSG00000162642	C1orf52	148423	gm117|FLJ44982	chromosome 1 open reading frame 52	Non-canonical_RBP
ENSG00000162664	ZNF326	284695	Zfp326|ZAN75|FLJ20403|ZIRD	zinc finger protein 326	AKAP95
ENSG00000162669	HFM1	164045	MER3|FLJ39011|FLJ36760|SEC63D1	helicase for meiosis 1	DEAD
ENSG00000162676	GFI1	2672	GFI1A|GFI-1|ZNF163	growth factor independent 1 transcriptional repressor	zf-C2H2
ENSG00000162688	AGL	178	N	amylo-alpha-1, 6-glucosidase, 4-alpha-glucanotransferase	Non-canonical_RBP
ENSG00000162775	RBM15	64783	OTT|OTT1	RNA binding motif protein 15	RRM_1
ENSG00000162782	TDRD5	163589	FLJ34823|TUDOR3	tudor domain containing 5	TUDOR
ENSG00000162851	TFB2M	64216	FLJ23182|FLJ22661|Hkp1	transcription factor B2, mitochondrial	RrnaAD
ENSG00000162909	CAPN2	824	mCANP|CANPml|CANPL2	calpain 2	Non-canonical_RBP
ENSG00000162910	MRPL55	128308	N	mitochondrial ribosomal protein L55	Mitoc_L55
ENSG00000162923	WDR26	80232	FLJ21016|GID7	WD repeat domain 26	eIF2A
ENSG00000162980	ARL5A	26225	ARL5	ADP ribosylation factor like GTPase 5A	MMR_HSR1
ENSG00000163002	NUP35	129401	MP44	nucleoporin 35	Nup35_RRM
ENSG00000163104	SMARCAD1	56916	ETL1|DKFZP762K2015|KIAA1122|DKFZp762K2015	SWI/SNF-related, matrix-associated actin-dependent regulator of chromatin, subfamily a, containing DEAD/H box 1	ResIII
ENSG00000163110	PDLIM5	10611	LIM|Enh	PDZ and LIM domain 5	Non-canonical_RBP
ENSG00000163125	RPRD2	23248	FLJ32145|HSPC099|KIAA0460	regulation of nuclear pre-mRNA domain containing 2	Non-canonical_RBP
ENSG00000163161	ERCC3	2071	XPB|BTF2|RAD25|TFIIH|GTF2H	ERCC excision repair 3, TFIIH core complex helicase subunit	ResIII
ENSG00000163166	IWS1	55677	DKFZp761G0123|FLJ10006|FLJ14655|FLJ32319	interacts with SUPT6H, CTD assembly factor 1	Non-canonical_RBP
ENSG00000163214	DHX57	90957	DDX57	DExH-box helicase 57	HA2
ENSG00000163220	S100A9	6280	P14|MIF|NIF|LIAG|MRP14|MAC387|60B8AG|CGLB|CAGB|CFAG	S100 calcium binding protein A9	Non-canonical_RBP
ENSG00000163239	TDRD10	126668	DKFZp434M202	tudor domain containing 10	TUDOR
ENSG00000163312	HELQ	113510	Hel308	helicase, POLQ like	DEAD
ENSG00000163319	MRPS18C	51023	MRPS18-1|CGI-134|FLJ11146|FLJ22967	mitochondrial ribosomal protein S18C	Ribosomal_S18
ENSG00000163399	ATP1A1	476	N	ATPase Na+/K+ transporting subunit alpha 1	Non-canonical_RBP
ENSG00000163412	EIF4E3	317649	MGC39820	eukaryotic translation initiation factor 4E family member 3	IF4E
ENSG00000163468	CCT3	7203	Cctg|TRIC5	chaperonin containing TCP1 subunit 3	Non-canonical_RBP
ENSG00000163491	NEK10	152110	FLJ32685	NIMA related kinase 10	RIO1
ENSG00000163507	CIP2A	57650	KIAA1524	cell proliferation regulating inhibitor of protein phosphatase 2A	Non-canonical_RBP
ENSG00000163510	CWC22	57703	KIAA1604|EIF4GL|fSAPb|NCM	CWC22 spliceosome associated protein homolog	MA3
ENSG00000163516	ANKZF1	55139	FLJ10415|ZNF744	ankyrin repeat and zinc finger domain containing 1	Non-canonical_RBP
ENSG00000163539	CLASP2	23122	KIAA0627	cytoplasmic linker associated protein 2	Non-canonical_RBP
ENSG00000163545	NUAK2	81788	SNARK|FLJ90349	NUAK family kinase 2	RIO1
ENSG00000163565	IFI16	3428	IFNGIP1|PYHIN2	interferon gamma inducible protein 16	Non-canonical_RBP
ENSG00000163577	EIF5A2	56648	N	eukaryotic translation initiation factor 5A2	eIF-5a
ENSG00000163584	RPL22L1	200916	N	ribosomal protein L22 like 1	Ribosomal_L22e
ENSG00000163602	RYBP	23429	YEAF1|AAP1|DEDAF	RING1 and YY1 binding protein	zf-RanBP
ENSG00000163607	GTPBP8	29083	HSPC135	GTP binding protein 8 (putative)	MMR_HSR1
ENSG00000163608	NEPRO	25871	DKFZP434F2021|NET17|C3orf17	nucleolus and neural progenitor protein	Non-canonical_RBP
ENSG00000163625	WDFY3	23001	KIAA0993|ALFY|ZFYVE25	WD repeat and FYVE domain containing 3	Non-canonical_RBP
ENSG00000163634	THOC7	80145	NIF3L1BP1|FLJ23445|fSAP24	THO complex 7	THOC7
ENSG00000163636	PSMD6	9861	S10|p44S10|KIAA0107|Rpn7	proteasome 26S subunit, non-ATPase 6	Non-canonical_RBP
ENSG00000163655	GMPS	8833	GATD7	guanine monophosphate synthase	tRNA_Me_trans
ENSG00000163659	TIPARP	25976	DKFZP434J214|DKFZp686N0351|DDF1|PARP7|PARP-7|PARP-1|pART14|RM1	TCDD inducible poly(ADP-ribose) polymerase	PARP
ENSG00000163681	SLMAP	7871	SLAP|KIAA1601	sarcolemma associated protein	Non-canonical_RBP
ENSG00000163682	RPL9	6133	L9	ribosomal protein L9	Ribosomal_L6
ENSG00000163684	RPP14	11102	P14	ribonuclease P/MRP subunit p14	RNase_P_Rpp14
ENSG00000163687	DNASE1L3	1776	DNAS1L3|LSD	deoxyribonuclease 1 like 3	Exo_endo_phos
ENSG00000163694	RBM47	54502	FLJ20273|NET18	RNA binding motif protein 47	RRM_1
ENSG00000163714	U2SURP	23350	fSAPa|SR140	U2 snRNP associated SURP domain containing	Surp
ENSG00000163781	TOPBP1	11073	KIAA0259|TOP2BP1|Dpb11	DNA topoisomerase II binding protein 1	Non-canonical_RBP
ENSG00000163798	SLC4A1AP	22950	kanadaptin|HLC3	solute carrier family 4 member 1 adaptor protein	dsrm
ENSG00000163808	KIF15	56992	HKLP2|NY-BR-62|KNSL7	kinesin family member 15	Non-canonical_RBP
ENSG00000163811	WDR43	23160	KIAA0007|NET12|UTP5	WD repeat domain 43	Utp12
ENSG00000163820	FYCO1	79443	FLJ13335|ZFYVE7	FYVE and coiled-coil domain containing 1	Non-canonical_RBP
ENSG00000163874	ZC3H12A	80149	FLJ23231|MCPIP1	zinc finger CCCH-type containing 12A	RNase_Zc3h12a
ENSG00000163882	POLR2H	5437	RPB8	RNA polymerase II subunit H	RNA_pol_Rpb8
ENSG00000163902	RPN1	6184	OST1	ribophorin I	Non-canonical_RBP
ENSG00000163918	RFC4	5984	A1|RFC37	replication factor C subunit 4	Non-canonical_RBP
ENSG00000163923	RPL39L	116832	RPL39L1	ribosomal protein L39 like	Ribosomal_L39
ENSG00000163931	TKT	7086	N	transketolase	Non-canonical_RBP
ENSG00000163938	GNL3	26354	C77032|E2IG3|MGC800|NS	G protein nucleolar 3	GN3L_Grn1
ENSG00000163939	PBRM1	55193	BAF180|PB1	polybromo 1	Non-canonical_RBP
ENSG00000163946	TASOR	23272	se89-1|RAP140|KIAA1105|TASOR1|C3orf63|FAM208A	transcription activation suppressor	Non-canonical_RBP
ENSG00000163950	SLBP	7884	HBP	stem-loop binding protein	SLBP_RNA_bind
ENSG00000164022	AIMP1	9255	EMAPII|EMAP-2|p43|SCYE1	aminoacyl tRNA synthetase complex interacting multifunctional protein 1	tRNA_bind
ENSG00000164024	METAP1	23173	KIAA0094|MetAP1A|MAP1A	methionyl aminopeptidase 1	Non-canonical_RBP
ENSG00000164062	APEH	327	D3F15S2|DNF15S2|D3S48E	acylaminoacyl-peptide hydrolase	Non-canonical_RBP
ENSG00000164070	HSPA4L	22824	APG-1|Osp94|HSPH3	heat shock protein family A (Hsp70) member 4 like	Non-canonical_RBP
ENSG00000164080	RAD54L2	23132	KIAA0809|SRISNF2L|ARIP4	RAD54 like 2	ResIII
ENSG00000164087	POC1A	25886	DKFZP434C245|WDR51A	POC1 centriolar protein A	eIF2A
ENSG00000164104	HMGB2	3148	HMG2	high mobility group box 2	Non-canonical_RBP
ENSG00000164111	ANXA5	308	ENX2|ANX5	annexin A5	Non-canonical_RBP
ENSG00000164113	ADAD1	132612	Tenr	adenosine deaminase domain containing 1	A_deamin
ENSG00000164134	NAA15	80155	TBDN100|NATH|FLJ13340|NARG1	N(alpha)-acetyltransferase 15, NatA auxiliary subunit	Non-canonical_RBP
ENSG00000164151	ICE1	23379	KIAA0947	interactor of little elongation complex ELL subunit 1	Non-canonical_RBP
ENSG00000164163	ABCE1	6059	RLI|OABP|RLI1|RNASEL1|RNASELI|RNS4I	ATP binding cassette subfamily E member 1	Non-canonical_RBP
ENSG00000164164	OTUD4	54726	HSHIN1|KIAA1046|DUBA6	OTU deubiquitinase 4	Non-canonical_RBP
ENSG00000164167	LSM6	11157	YDR378C	LSM6 homolog, U6 small nuclear RNA and mRNA degradation associated	LSM
ENSG00000164190	NIPBL	25836	IDN3|DKFZp434L1319|FLJ11203|FLJ12597|FLJ13354|FLJ13648|Scc2	NIPBL cohesin loading factor	Non-canonical_RBP
ENSG00000164252	AGGF1	55109	VG5Q|HSU84971|FLJ10283|GPATC7|GPATCH7	angiogenic factor with G-patch and FHA domains 1	G-patch
ENSG00000164329	TENT2	167153	FLJ38499|GLD2|TUT2|PAPD4	terminal nucleotidyltransferase 2	PAP_assoc
ENSG00000164338	UTP15	84135	FLJ12787|NET21|FLJ23637	UTP15 small subunit processome component	UTP15_C
ENSG00000164346	NSA2	10412	HUSSY-29|HCLG1|FLJ94393|TINP1	NSA2 ribosome biogenesis factor	Ribosomal_S8e
ENSG00000164347	GFM2	84340	EFG2|FLJ21661|EF-G2mt	G elongation factor mitochondrial 2	GTP_EFTU
ENSG00000164362	TERT	7015	TRT|TP2|TCS1|hEST2|EST2	telomerase reverse transcriptase	Telomerase_RBD
ENSG00000164402	44447	23176	KIAA0202|SEP2	septin 8	MMR_HSR1
ENSG00000164430	CGAS	115004	cGAS|C6orf150|MB21D1	cyclic GMP-AMP synthase	Non-canonical_RBP
ENSG00000164548	TRA2A	29896	htra-2-alpha|tra2a|AWMS1	transformer 2 alpha homolog	RRM_1
ENSG00000164587	RPS14	6208	EMTB|S14	ribosomal protein S14	Ribosomal_S11
ENSG00000164609	SLU7	10569	9G8	SLU7 homolog, splicing factor	Slu7
ENSG00000164687	FABP5	2171	E-FABP|PA-FABP|KFABP	fatty acid binding protein 5	Non-canonical_RBP
ENSG00000164818	DNAAF5	54919	FLJ20397|FLJ31671|FLJ39381|FLJ25564|CILD18|HEATR2	dynein axonemal assembly factor 5	Non-canonical_RBP
ENSG00000164828	SUN1	23353	KIAA0810|FLJ12407|UNC84A	Sad1 and UNC84 domain containing 1	MRP
ENSG00000164880	INTS1	26173	DKFZp586J0619|KIAA1440|INT1|NET28	integrator complex subunit 1	Non-canonical_RBP
[truncated: 949 more rows]

## Sheet: 02.immune genes
AZGP1
B2M
CALR
CANX
CD1A
CD1B
CD1C
CD1D
CD1E
CD4
CD8A
CD8B
CD74
CREB1
CTSB
CTSE
CTSL
CTSS
FCER1G
FCGRT
PDIA3
HFE
HLA-A
HLA-B
HLA-C
HLA-DMA
HLA-DMB
HLA-DOA
HLA-DOB
HLA-DPA1
HLA-DPB1
HLA-DQA1
HLA-DQA2
HLA-DQB1
HLA-DRA
HLA-DRB1
HLA-DRB3
HLA-DRB4
HLA-DRB5
HLA-E
HLA-F
HLA-G
HLA-H
MR1
HSPA1A
HSPA1B
HSPA1L
HSPA2
HSPA4
HSPA5
HSPA6
HSPA8
HSP90AA1
HSP90AB1
ICAM1
IFNA1
IFNA2
IFNA4
IFNA5
IFNA6
IFNA7
IFNA8
IFNA10
IFNA13
IFNA14
IFNA16
IFNA17
IFNA21
IFNG
KIR2DL1
KIR2DL2
KIR2DL3
KIR2DL4
KIR2DS1
KIR2DS3
KIR2DS4
KIR2DS5
KIR3DL1
KIR3DL2
KLRC1
KLRC2
KLRC3
KLRD1
LTA
CIITA
MICA
MICB
NFYA
NFYB
NFYC
LGMN
PSMB8
PSMC1
PSMC2
PSMC3
PSMC4
PSMC5
PSMC6
PSMD1
PSMD2
PSMD3
PSMD4
PSMD5
PSMD7
PSMD8
PSMD10
PSMD11
PSMD13
PSME1
PSME1
PSME2
PSME2
RELB
RFX5
RFXAP
SLC10A2
TAP1
TAP2
TAPBP
THBS1
SEM1
KLRC4
AP3B1
RFXANK
PSMD6
PSME3
PSMD14
CLEC4M
IFI30
PROCR
ADRM1
ECPAS
TRPC4AP
CD209
UBXN1
ERAP1
TAPBPL
KIR2DL5A
ERAP2
ULBP3
ULBP2
ULBP1
KIR3DL3
RAET1E
RAET1L
UBR1
RAET1G
PDIA2
HAMP
PI3
CAMP
DEFB4A
PPBP
REG3G
CXCL14
CXCL16
SLPI
CXCL8
CXCL10
CXCL9
CXCL5
CXCL11
CXCL6
CXCL1
CXCL12
CXCL13
CXCL2
PF4
XCL1
CXCL3
DEFB103B
CCL13
CCL1
DEFB1
CCL8
ELANE
DEFB103A
DEFA3
DEFA1
TMSB10
DEFA6
DEFA5
DEFA4
LCN2
LCN1
COLEC10
BPI
S100A9
S100A8
DCD
LCN6
S100A12
HTN3
LCN8
DEFA1B
CCR10
CELA1
DEFB106A
PENK
BPIFC
MMP12
BPIFB6
LEAP2
SFTPD
LCN9
BPIFB2
PTGDS
TMSB4X
PGLYRP1
ZC3HAV1
TMSB15A
S100B
S100A13
S100A6
DEFB119
DEFB107A
DEFB105A
SERPIND1
DEFB129
DEFB127
S100P
S100A7
DEFB104A
DEFB126
DEFB106B
DEFB104B
DEFB107B
PGLYRP3
PGLYRP2
S100A10
S100A2
DEFB125
DEFB123
DEFB105B
DEFB132
BPIFB3
LCN12
PGLYRP4
S100A11
S100A5
S100A3
S100A1
DEFB128
DEFB108B
HTN1
LMBR1L
S100A7A
DEFB118
COLEC12
TMSB4Y
DEFB131A
DEFB134
DEFB130A
DEFB124
DEFB121
DEFB116
DEFB115
DEFB114
DEFB113
DEFB112
DEFB110
TMSB15B
DEFB133
S100Z
MAVS
TMSB4XP8
S100A14
LCN10
S100A16
DEFB136
DEFB135
DEFB117
DEFB110
ZC3HAV1L
S100A7L2
MBL3P
DEFB4B
BPIFB4
IFNAR1
AZU1
DEFB131B
DEFA1A3
LCN1P1
S100G
DEFA7P
DEFB130B
DEFB108F
DEFB131C
TCHHL1
TINAGL1
IFNGR1
SLC22A17
WFIKKN1
WFDC2
IL6
UMODL1
TGFB1
PF4V1
MMP9
ANOS1
TLR4
IFNG
SPAG11B
A2M
CTSL
NFKB1
APOBEC3G
FABP6
NOD2
MBL2
SFTPA1
RBP1
TLR2
SLC40A1
PLAU
IL1B
PAEP
HJV
MUC5AC
CTSS
OBP2A
PLTP
MX1
DDX58
IFNL1
IRF3
SFTPA2
LPA
LBP
RBP4
SFTPA1
NOX4
LTF
IFNB1
RBP5
FABP7
FABP5
FABP3
FABP2
FABP4
R3HDML
BPIFA3
BPIFB1
OASL
CRABP2
CRABP1
RBP7
DUOX1
OBP2B
RBP2
LCN15
CETP
FABP12
FABP9
BPIFA1
LCNL1
C8G
SPAG11A
PI15
NOX1
PMP2
APOD
ORM2
ORM1
TNF
CTSG
PRTN3
MAPK1
PML
AEN
CYBB
BPIFA2
ISG20
BCL3
ISG20L2
NOX5
NOX3
DUOX2
TLR3
TFRC
IFIH1
LRP1
TRIM5
IDO1
GDF15
NEDD4
ADIPOQ
STAT3
STAT1
IFNL2
SOCS3
SEMG1
TNFSF10
CCL20
SOCS1
RNASEL
IRF1
IL15
APOBEC3F
PLAAT4
CHIT1
IFNA1
CD40
TLR7
PPIA
HFE
ZYX
NLRX1
PGC
VEGFA
IKBKE
ISG15
DHX58
TNFAIP3
TFR2
FCN2
MUC4
F2R
ELN
IL27
MAPT
LYZ
CCL5
LEP
CYLD
KLKB1
CST4
CSRP1
MAPK14
JUN
ITGAV
IRF5
CCR6
IL12B
TLR8
GNLY
CD81
EIF2AK2
APOM
CACYBP
NOD1
MAPK8
MAPK3
BST2
BPHL
PLA2G2A
GRN
NEWENTRY
PDGFRA
GNAI1
WNT5A
FURIN
ADAR
TYK2
NOS2
TRAF3
TPT1
TPM2
NEO1
AHNAK
TLR1
TK2
PRDX2
MX2
FGF2
FGA
TCF7L2
F2RL1
TKFC
MSR1
NFKBIZ
LMBR1
EPPIN
SRC
MPO
ELAVL1
ROBO3
SP1
SOD1
PDF
DLL4
ECD
SLC11A1
DMBT1
STING1
SKIV2L
SEMG2
LTA
DES
DCK
DAXX
TNFRSF10A
TNFRSF10B
EED
CCL4
LIMS1
LALBA
APOBEC3H
TMPRSS6
SPINK5
MARCO
BECN1
TNFSF11
KNG1
CSK
KLRK1
KCNH2
JUND
JAK1
CREB1
CLDN4
CCL28
RNASE3
RN7SL1
IRF7
IREB2
ILK
IL18
IL17A
LTB4R
APOBEC3A
MASP2
TRIM27
RELA
IL7R
IL1A
PTX3
IFNAR2
IFN1@
SYTL1
APOBEC3C
DDX17
PTGS2
HTR1A
SEPTIN7
CD40LG
CD14
CD8A
CD4
MASP1
PROC
MAP2K2
MAP2K1
HRG
NDRG1
IRF9
TRIM22
LANCL1
PPP4C
HMOX1
HMGB1
HLA-B
RNASE7
ABCC4
HGF
HDAC1
IFNLR1
PLSCR1
B2M
BACH2
TANK
PIK3CG
ARRB1
RSAD2
STAB2
TBK1
PDYN
PDGFRB
PDCD1
PCSK2
PCSK1
ARG2
AQP9
FASLG
APOH
BIRC5
ANXA6
IL22
VTN
VIM
VCAM1
PRDX1
GFAP
GBP2
ALB
SLC29A3
OAS1
AGER
UNC93B1
TNFSF4
NOS1
ACTG1
ACTA1
ACO1
SERPINA3
CXCR1
CCL15
CCL14
CCL4
CCL16
CCL19
CCL13
CCL18
CCL17
CCL26
CCL22
CCR3
CCL28
CCL4L1
ACKR2
CCR7
CCL27
CCR8
ACKR4
CCR10
CCL2
CCL21
CCL7
CCL5
CCL3
CCL20
CCL11
CCR5
CCL23
CCL25
CCL1
CCL3L3
CCL4L2
CXCL12
XCL1
CCL8
CCL3L1
CCR1
CCL24
XCL2
CXCL1
CXCL10
CXCR4
CXCL2
CXCR6
CCR4
CXCL11
TAFA5
TAFA3
TAFA4
TAFA1
TAFA2
CCL15-CCL14
IL6
TNF
IL1B
IL18
PTK2B
VEGFA
IL4
CDH1
CD40
DEFB103B
F2RL1
MMP9
LTBP1
DEFB4A
TNFSF10
IL13
IL10
IL2
PPARG
FGR
MIF
CRP
JAK2
IL1A
PTK2
PTGDR
CD86
HCK
ARRB1
GNAI1
VDR
OLR1
GRK2
TXK
RNASE2
CD79A
CD79B
LYN
SYK
BTK
BLNK
VAV3
VAV1
VAV2
RAC1
RAC2
RAC3
PPP3CA
PPP3CB
PPP3CC
CHP1
PPP3R1
PPP3R2
CHP2
NFAT5
NFATC1
NFATC2
NFATC3
NFATC4
HRAS
KRAS
NRAS
FOS
JUN
CARD11
BCL10
MALT1
CHUK
IKBKB
IKBKG
NFKB1
RELA
NFKBIA
NFKBIB
NFKBIE
CD81
CD19
CR2
PIK3R5
PIK3R1
PIK3R2
PIK3R3
PIK3CA
PIK3CB
PIK3CD
PIK3CG
AKT3
AKT1
AKT2
GSK3B
INPP5D
CD22
CD72
PTPN6
LILRB3
FCGR2B
RASGRP3
PLCG2
PRKCB
IFITM1
IGH
IGHA1
IGHA2
IGHD
IGHD1-1
IGHD1-14
IGHD1-20
IGHD1-26
IGHD1-7
IGHD2-15
IGHD2-2
IGHD2-21
IGHD2-8
IGHD3-10
IGHD3-16
IGHD3-22
IGHD3-3
IGHD3-9
IGHD4-11
IGHD4-17
IGHD4-23
IGHD4-4
IGHD5-12
IGHD5-18
IGHD5-24
IGHD5-5
IGHD6-13
IGHD6-19
IGHD6-25
IGHD6-6
IGHD7-27
IGHE
IGHG1
IGHG2
IGHG3
IGHG4
IGHJ1
IGHJ2
IGHJ3
IGHJ4
IGHJ5
IGHJ6
IGHM
IGH
IGHV1-18
IGHV1-2
IGHV1-24
IGHV1-3
IGHV1-45
IGHV1-46
IGHV1-58
IGHV1-69
IGHV1-8
IGHV1-38-4
IGHV1-69-2
IGHV2-26
IGHV2-5
IGHV2-70
IGHV3-11
IGHV3-13
IGHV3-15
IGHV3-16
IGHV3-20
IGHV3-21
IGHV3-23
IGHV3-30
IGHV3-30-3
IGHV3-30-5
IGHV3-33
IGHV3-35
IGHV3-38
IGHV3-43
IGHV3-48
IGHV3-49
IGHV3-53
IGHV3-64
IGHV3-66
IGHV3-7
IGHV3-72
IGHV3-73
IGHV3-74
IGHV3-9
IGHV3-38-3
IGHV3-69-1
IGHV4-28
IGHV4-30-1
IGHV4-30-2
IGHV4-30-4
IGHV4-31
IGHV4-34
IGHV4-39
IGHV4-4
IGHV4-59
IGHV4-61
IGHV4-38-2
IGHV5-51
IGHV5-10-1
IGHV6-1
IGHV7-4-1
IGHV7-81
IGK
IGKC
IGKDEL
IGKJ
IGKJ1
IGKJ2
IGKJ3
IGKJ4
IGKJ5
IGKV@
IGKV1-12
IGKV1-13
IGKV1-16
IGKV1-17
IGKV1-27
IGKV1-33
IGKV1-37
IGKV1-39
IGKV1-5
IGKV1-6
IGKV1-8
IGKV1-9
IGKV1D-12
IGKV1D-13
IGKV1D-16
IGKV1D-17
IGKV1D-33
IGKV1D-37
IGKV1D-39
IGKV1D-42
IGKV1D-43
IGKV1D-8
IGKV2-24
IGKV2-28
IGKV2-30
IGKV2-40
IGKV2D-24
IGKV2D-28
IGKV2D-29
IGKV2D-30
IGKV2D-40
IGKV3-11
IGKV3-15
IGKV3-20
IGKV3-7
IGKV3D-11
IGKV3D-15
IGKV3D-20
IGKV3D-7
IGKV4-1
IGKV5-2
IGKV6-21
IGKV6D-21
IGKV6D-41
IGL
IGLC1
IGLC2
IGLC3
IGLC6
IGLC7
IGLJ
IGLJ1
IGLJ2
IGLJ3
IGLJ4
IGLJ5
IGLJ6
IGLJ7
IGLV@
IGLV1-36
IGLV1-40
IGLV1-44
IGLV1-47
IGLV1-50
IGLV1-51
IGLV10-54
IGLV11-55
IGLV2-11
IGLV2-14
IGLV2-18
IGLV2-23
IGLV2-33
IGLV2-8
IGLV3-1
IGLV3-10
IGLV3-12
IGLV3-16
IGLV3-19
IGLV3-21
IGLV3-22
IGLV3-25
IGLV3-27
IGLV3-32
IGLV3-9
IGLV4-3
IGLV4-60
IGLV4-69
IGLV5-37
IGLV5-39
IGLV5-45
IGLV5-48
IGLV5-52
IGLV6-57
IGLV7-43
IGLV7-46
IGLV8-61
IGLV9-49
C3
C5
CAMP
CCL1
CCL11
CCL13
CCL14
CCL15-CCL14
CCL15
CCL16
CCL17
CCL18
CCL19
CCL2
CCL20
CCL21
CCL22
CCL23
CCL24
CCL25
CCL26
CCL27
CCL28
CCL3
CCL3L1
CCL3P1
CCL3L3
CCL4
CCL4L2
CCL4L1
CCL5
CCL7
CCL8
CKLF
CMA1
CTSG
CX3CL1
CXCL1
CXCL10
CXCL11
CXCL12
CXCL13
CXCL14
CXCL16
CXCL17
CXCL2
CXCL3
CXCL5
CXCL6
CXCL9
CCN1
DEFA1
DEFA3
DEFA5
DEFB1
DEFB103B
DEFB104A
DEFB4A
EDN1
EDN2
EDN3
FGF10
FGF2
HTN3
CXCL8
LECT2
PF4
PF4V1
PLAU
PPBP
PPBPP1
PROK2
RNASE2
SAA1
SAA2
SBDS
SEMA3A
SEMA3B
SEMA3C
SEMA3D
SEMA3E
SEMA3F
SEMA3G
SEMA4A
SEMA4B
SEMA4C
SEMA4D
SEMA4F
SEMA4G
SEMA5A
SEMA5B
SEMA6A
SEMA6B
SEMA6C
SEMA6D
SEMA7A
SLIT1
SLIT2
TNC
TYMP
XCL1
XCL2
C5AR1
ACKR2
CCR1
CCR10
CCR3
CCR4
CCR5
CCR6
CCR7
CCR8
CCR9
ACKR4
CCRL2
CMKLR1
CX3CR1
CXCR3
CXCR4
CXCR5
CXCR6
ACKR3
CYSLTR1
CYSLTR2
ACKR1
EDNRA
EDNRB
FPR1
FPR2
FPR2
GPR17
GPR32
GPR33
PTGDR2
C5AR2
CXCR1
CXCR2
LTB4R
LTB4R2
PLAUR
PLXNA1
PLXNA2
PLXNA3
PLXNA4
PLXNB1
PLXNB2
PLXNB3
PLXNC1
PLXND1
PTAFR
ROBO1
ROBO2
ROBO3
RXFP3
XCR1
ADIPOQ
ADM
ADM2
AGRP
AGT
AMBN
AMELX
AMH
ANGPTL5
ANGPTL7
APLN
AREG
MANF
CDNF
ARTN
AVP
AZU1
BDNF
BMP1
BMP10
BMP15
BMP2
BMP3
BMP4
BMP5
BMP6
BMP7
BMP8A
BMP8B
BTC
MYDGF
C3
C5
CALCA
CALCB
CAMP
CAT
CCK
CCL1
CCL11
CCL13
CCL14
CCL15-CCL14
CCL15
CCL16
CCL17
CCL18
CCL19
CCL2
CCL20
CCL21
CCL22
CCL23
CCL24
CCL25
CCL26
CCL27
CCL28
CCL3
CCL3L1
CCL3P1
CCL3L3
CCL4
CCL4L2
CCL4L1
CCL5
CCL7
CCL8
CD320
CD40LG
CD70
ADA2
CER1
CGA
CGB3
CGB1
CGB2
CGB5
CGB7
CGB8
CHGA
CHGB
CKLF
CLCF1
CLEC11A
CMA1
CMTM1
CMTM2
CMTM3
CMTM4
CMTM5
CMTM6
CMTM7
CMTM8
CNTF
CORT
CRH
CSF1
CSF2
CSF3
CSH1
CSH2
CSHL1
CSPG5
CTF1
CCN2
CTSG
CX3CL1
CXCL1
CXCL10
CXCL11
CXCL12
CXCL13
CXCL14
CXCL16
CXCL17
CXCL2
CXCL3
CXCL5
CXCL6
CXCL9
CCN1
DEFA1
DEFA3
DEFA5
DEFB1
DEFB103B
DEFB104A
DEFB4A
DKK1
EBI3
EDN1
EDN2
EDN3
EGF
EPGN
EPO
EREG
ESM1
FAM3B
FAM3C
FAM3D
FASLG
FGF1
FGF10
FGF11
FGF12
FGF13
FGF14
FGF16
FGF17
FGF18
FGF19
FGF2
FGF20
FGF21
FGF22
FGF23
FGF3
FGF4
FGF5
FGF6
FGF7
FGF8
FGF9
VEGFD
FIGNL2
FLT3LG
FSHB
GAL
GALP
GAST
GCG
GDF1
GDF10
GDF11
GDF15
GDF2
GDF3
GDF5
GDF6
GDF7
GDF9
GDNF
GH1
GH2
GHRH
GHRL
GIP
GKN1
GMFB
GMFG
GNRH1
GNRH2
GPHA2
GPHB5
GPI
GREM1
GREM2
GRN
GRP
GUCA2A
HAMP
HBEGF
HDGF
HDGFL3
HGF
HTN3
IAPP
IFNA1
IFNA10
IFNA13
IFNA14
IFNA16
IFNA17
IFNA2
IFNA21
IFNA4
IFNA5
IFNA6
IFNA7
IFNA8
IFNB1
IFNE
IFNG
IFNK
IFNW1
IGF1
IGF2
IL10
IL11
IL12A
IL12B
IL13
IL15
IL16
IL17A
IL17B
IL17C
IL17D
IL17F
IL18
IL19
IL1A
IL1B
IL1F10
IL36RN
IL36A
IL37
IL36B
IL36G
IL1RN
IL2
IL20
IL21
IL22
IL23A
IL24
IL25
IL26
IL27
IFNL2
IFNL3
IFNL1
IL3
IL31
IL32
IL33
IL34
IL4
IL5
IL6
IL6ST
IL7
CXCL8
IL9
INHA
INHBA
INHBB
INHBC
INHBE
INS
INS-IGF2
INSL3
INSL4
INSL5
INSL6
JAG1
JAG2
FGF7P6
FGF7P3
KITLG
KL
LACRT
LECT2
LEFTY1
LEFTY2
LEP
LHB
LIF
LRSAM1
LTA
LTB
LTBP1
LTBP2
LTBP3
LTBP4
MDK
MIA
MIF
MLN
MSTN
NAMPT
NDP
NENF
NGF
NMB
NODAL
CCN3
NPFF
NPPA
NPPB
NPPC
NPY
NRG1
NRG2
NRG3
NRG4
NRTN
NTF3
NTF4
NTS
NUDT6
OGN
OSGIN1
OSM
OSTN
OXT
ENDOU
PDGFA
PDGFB
PDGFC
PDGFD
PDGFRA
PDGFRB
PDGFRL
PDYN
PENK
PF4
PF4V1
PGF
PLAU
PMCH
PNOC
POMC
PPBP
PPBPP1
PPBPP2
PPY
PRL
PRLH
PROK1
PROK2
PSPN
PTH
PTH2
PTHLH
PTN
PYY
QRFP
RABEP1
RABEP2
REG1A
RETN
RETNLB
RLN1
RLN2
RLN3
RNASE2
S100A6
SAA1
SAA2
SBDS
SCG2
SCGB3A1
SCT
AIMP1
SECTM1
SEMA3A
SEMA3B
SEMA3C
SEMA3D
SEMA3E
SEMA3F
SEMA3G
SEMA4A
SEMA4B
SEMA4C
SEMA4D
SEMA4F
SEMA4G
SEMA5A
SEMA5B
SEMA6A
SEMA6B
SEMA6C
SEMA6D
SEMA7A
SLIT1
SLIT2
SLURP1
SPP1
SST
STC1
STC2
TAC1
TDGF1
TDGF1P3
TG
TGFA
TGFB1
TGFB2
TGFB3
THPO
TNC
TNF
TNFRSF11B
TNFSF10
TNFSF11
TNFSF12
TNFSF13
TNFSF13B
TNFSF14
TNFSF15
TNFSF18
TNFSF4
TNFSF8
TNFSF9
TOR2A
TRH
TSHB
TSLP
TXLNA
TYMP
UCN
UCN2
UCN3
UTS2
UTS2B
VEGFA
VEGFB
VEGFC
VGF
VIP
XCL1
XCL2
ACVR1B
ACVR1C
ACVR2A
ACVR2B
ACVRL1
ADCYAP1R1
ADIPOR1
ADIPOR2
ADRB1
ADRB2
AGTR1
AGTR2
AMHR2
ANGPT1
ANGPT4
ANGPTL1
ANGPTL2
ANGPTL3
ANGPTL4
ANGPTL6
APLNR
AR
AVPR1A
AVPR1B
AVPR2
BMPR1A
BMPR1B
BMPR2
BRD8
C3AR1
C5AR1
CALCR
CALCRL
ACKR2
CCR1
CCR10
CCR3
CCR4
CCR5
CCR6
CCR7
CCR8
CCR9
ACKR4
CCRL2
CD40
CMKLR1
CNTFR
CRHR1
CRHR2
CRIM1
CRLF1
CRLF2
CRLF3
CSF1R
CSF2RA
CSF2RB
CSF3R
CX3CR1
CXCR3
CXCR4
CXCR5
CXCR6
ACKR3
CYSLTR1
CYSLTR2
ACKR1
EDNRA
EDNRB
EGFR
ENG
EPOR
ESR1
ESR2
ESRRA
ESRRB
ESRRG
FGFR1
FGFR2
FGFR3
FGFR4
FGFRL1
FLT1
FLT3
FLT4
FPR1
FPR2
FPR2
FSHR
GALR2
GALR3
GCGR
GHR
GHRHR
GHSR
GIPR
GLP1R
GLP2R
GNRHR
GPER1
GPR17
GPR32
GPR33
PTGDR2
C5AR2
HNF4A
HNF4G
HTR3A
HTR3B
HTR3C
HTR3D
HTR3E
IFNAR1
IFNAR2
IFNGR1
IFNGR2
IGF1R
IGF2R
IL10RA
IL10RB
IL11RA
IL12RB1
IL12RB2
IL13RA1
IL13RA2
IL15RA
IL2RB
IL17RA
IL17RB
IL17RC
IL17RD
IL17RE
IL18R1
IL18RAP
IL1R1
IL1R2
IL1RAP
IL1RL1
IL1RL2
IL20RA
IL20RB
IL21R
IL22RA1
IL22RA2
IL23R
IL27RA
IFNLR1
IL2RA
IL2RB
IL2RG
IL31RA
IL3RA
IL4R
IL5RA
IL6R
IL7R
CXCR1
CXCR2
IL9R
INSR
KDR
LEPR
LGR4
LGR5
LGR6
LHCGR
LIFR
LTB4R
LTB4R2
LTBR
MC1R
MC2R
MC3R
MC4R
MCHR1
MCHR2
MET
MLNR
MPL
MTNR1A
MTNR1B
NGFR
NMBR
NPR1
NPR3
NR0B1
NR0B2
NR1D1
NR1D2
NR1H2
NR1H3
NR1H4
NR1I2
NR1I3
NR2C1
NR2C2
NR2E1
NR2E3
NR2F1
NR2F2
NR2F6
NR3C1
NR3C2
NR4A1
NR4A2
NR4A3
NR5A1
NR5A2
NR6A1
NRP1
NRP2
OGFR
OPRD1
OPRK1
OPRL1
OPRM1
OSMR
OXTR
PGR
PGRMC2
PLAUR
PLXNA1
PLXNA2
PLXNA3
PLXNA4
PLXNB1
PLXNB2
PLXNB3
PLXNC1
PLXND1
PPARA
PPARD
PPARG
PRLHR
PRLR
PTAFR
PTGDR
PTGDS
PTGER1
PTGER2
PTGER3
PTGER4
PTGFR
PTH1R
PTH2R
RARA
RARB
RARG
ROBO1
ROBO2
ROBO3
RORA
RORB
RORC
RXFP1
RXFP2
RXFP3
RXRA
RXRB
RXRG
S1PR1
S1PR2
SCTR
SDC1
SDC2
SDC3
SDC4
SORT1
SSTR1
SSTR2
SSTR5
ST2
TACR1
TEK
TGFBR1
TGFBR2
TGFBR3
THRA
THRB
TIE1
TNFRSF10A
TNFRSF10B
TNFRSF10C
TNFRSF10D
TNFRSF11A
TNFRSF12A
TNFRSF13B
TNFRSF13C
TNFRSF14
TNFRSF17
TNFRSF18
TNFRSF19
TNFRSF1A
TNFRSF1B
TNFRSF21
TNFRSF25
TNFRSF4
TNFRSF6B
TNFRSF8
TNFRSF9
TRHR
TSHR
TUBB3
VDR
VIPR1
VIPR2
XCR1
IFNA10
IFNA13
IFNA14
IFNA16
IFNA17
IFNA2
IFNA21
IFNA4
IFNA5
IFNA6
IFNA7
IFNA8
IFNB1
IFNE
IFNG
IFNK
IFNW1
IFNAR2
IFNGR1
IFNGR2
IL11
IL12A
IL12B
IL13
IL15
IL16
IL17A
IL17B
IL17C
IL17D
IL17F
IL18
IL19
IL1A
IL1B
IL1F10
IL36RN
IL36A
IL37
IL36B
IL36G
IL1RN
IL2
IL20
IL21
IL22
IL23A
IL24
IL25
IL26
IL27
IFNL2
IFNL3
IFNL1
IL3
IL31
IL32
IL33
IL34
IL4
IL5
IL6
IL6ST
IL7
CXCL8
IL9
TXLNA
IL10RA
IL10RB
IL11RA
IL12RB1
IL12RB2
IL13RA1
IL13RA2
IL15RA
IL2RB
IL17RA
IL17RB
IL17RC
IL17RD
IL17RE
IL18R1
IL18RAP
IL1R1
IL1R2
IL1RAP
IL1RL1
IL1RL2
IL20RA
IL20RB
IL21R
IL22RA1
IL22RA2
IL23R
IL27RA
IFNLR1
IL2RA
IL2RB
IL2RG
IL31RA
IL3RA
IL4R
IL5RA
IL6R
IL7R
CXCR1
CXCR2
IL9R
ST2
HLA-A
HLA-B
HLA-C
HLA-E
HLA-G
KIR3DL1
KIR3DL2
KIR2DL1
KIR2DL2
KIR2DL3
KIR2DL4
KIR2DL5A
KLRC1
KLRC2
KLRC3
KLRD1
PTPN6
PTPN11
[truncated: 483 more rows]

## Sheet: 03.RBPs and immune genes relate
immuneGene	RDP	cor	pvalue	Regulation
AGER	AAAS	0.56422	6.47e-35	postive
AMH	AAAS	0.533467	1e-30	postive
DAXX	AAAS	0.509453	9.73e-28	postive
LMBR1L	AAAS	0.696322	3.76e-59	postive
NR2C1	AAAS	0.526749	7.27e-30	postive
PSMD3	AAAS	0.548477	1.02e-32	postive
RAF1	AAAS	0.523999	1.61e-29	postive
TOR2A	AAAS	0.570299	8.51e-36	postive
TRIM27	AAAS	0.539157	1.81e-31	postive
PSMD3	AAR2	0.53639	4.19e-31	postive
PSME3	AAR2	0.514977	2.1e-28	postive
TRPC4AP	AAR2	0.694733	8.81e-59	postive
PSMC5	AATF	0.533524	9.88e-31	postive
RAC3	AATF	0.532651	1.28e-30	postive
UBXN1	AATF	0.557851	5.19e-34	postive
ABCC4	ABCC4	1	0	postive
BIRC5	ABT1	0.609014	7.28e-42	postive
CDC42	ABT1	0.537274	3.21e-31	postive
CKLF	ABT1	0.594551	1.68e-39	postive
CMTM4	ABT1	-0.555695	1.04e-33	negative
CYLD	ABT1	-0.528935	3.84e-30	negative
DAXX	ABT1	0.555746	1.02e-33	postive
MIF	ABT1	0.602752	7.94e-41	postive
MYDGF	ABT1	0.635374	1.69e-46	postive
NR3C2	ABT1	-0.504913	3.36e-27	negative
PPIA	ABT1	0.59215	4.04e-39	postive
PPP4C	ABT1	0.719615	7.19e-65	postive
PRDX2	ABT1	0.541157	9.87e-32	postive
PSMC4	ABT1	0.545699	2.44e-32	postive
PSMC6	ABT1	0.60974	5.5e-42	postive
PSMD13	ABT1	0.644279	3.61e-48	postive
PSMD14	ABT1	0.61346	1.29e-42	postive
PSMD3	ABT1	0.510171	7.98e-28	postive
PSMD8	ABT1	0.661861	1.24e-51	postive
PSME1	ABT1	0.523077	2.1e-29	postive
PTPN11	ABT1	-0.500072	1.23e-26	negative
TK2	ABT1	-0.548065	1.17e-32	negative
TMSB10	ABT1	0.580332	2.72e-37	postive
TMSB4X	ABT1	0.515544	1.79e-28	postive
TPT1	ABT1	0.546596	1.84e-32	postive
CMTM1	ACLY	0.525886	9.34e-30	postive
ELAVL1	ACLY	0.524617	1.35e-29	postive
PSMD11	ACLY	0.587106	2.49e-38	postive
PSME3	ACLY	0.605633	2.66e-41	postive
ACO1	ACO1	1	0	postive
CALR	ACO2	-0.510379	7.53e-28	negative
CKLF	ACO2	-0.569853	9.89e-36	negative
CMTM3	ACO2	-0.550188	5.99e-33	negative
HDAC1	ACO2	-0.512529	4.16e-28	negative
IFNGR2	ACO2	-0.530337	2.54e-30	negative
IL10RB	ACO2	-0.558135	4.73e-34	negative
MANF	ACO2	-0.507801	1.53e-27	negative
MAPK1	ACO2	0.572831	3.61e-36	postive
MAPT	ACO2	0.592567	3.47e-39	postive
MYDGF	ACO2	-0.523767	1.73e-29	negative
NRG3	ACO2	0.510638	7.02e-28	postive
PIK3CB	ACO2	0.51376	2.95e-28	postive
PPARA	ACO2	0.569328	1.18e-35	postive
PPP4C	ACO2	-0.564057	6.83e-35	negative
SEM1	ACO2	-0.512499	4.19e-28	negative
TMSB10	ACO2	-0.525946	9.18e-30	negative
BRAF	ADARB1	0.525164	1.15e-29	postive
CCK	ADARB1	0.536946	3.54e-31	postive
CHGA	ADARB1	0.508757	1.18e-27	postive
CRHR1	ADARB1	0.539793	1.5e-31	postive
FGF13	ADARB1	0.532717	1.26e-30	postive
GREM2	ADARB1	0.616022	4.7e-43	postive
MAP2K1	ADARB1	0.552036	3.34e-33	postive
OPRL1	ADARB1	0.562038	1.33e-34	postive
PAK1	ADARB1	0.586008	3.68e-38	postive
PAK3	ADARB1	0.574674	1.92e-36	postive
PPP3CA	ADARB1	0.61183	2.44e-42	postive
PPP3CB	ADARB1	0.640083	2.25e-47	postive
PPP3R1	ADARB1	0.586029	3.65e-38	postive
PRKCB	ADARB1	0.644188	3.76e-48	postive
PRKCG	ADARB1	0.597265	6.18e-40	postive
PTK2B	ADARB1	0.508021	1.44e-27	postive
RBP4	ADARB1	0.538109	2.49e-31	postive
THRB	ADARB1	0.587331	2.3e-38	postive
VIP	ADARB1	0.630947	1.09e-45	postive
VIPR1	ADARB1	0.58408	7.29e-38	postive
ADIPOR2	ADARB2	0.522223	2.69e-29	postive
ARRB1	ADARB2	0.584803	5.65e-38	postive
BCL10	ADARB2	-0.55117	4.39e-33	negative
CD22	ADARB2	0.521785	3.05e-29	postive
CDC42	ADARB2	-0.509878	8.65e-28	negative
CHGB	ADARB2	0.505123	3.17e-27	postive
CMTM4	ADARB2	0.509286	1.02e-27	postive
CMTM5	ADARB2	0.505732	2.69e-27	postive
CMTM6	ADARB2	-0.508896	1.13e-27	negative
GNAI1	ADARB2	0.513086	3.56e-28	postive
HDAC1	ADARB2	-0.53391	8.8e-31	negative
IFNGR2	ADARB2	-0.53418	8.12e-31	negative
LANCL1	ADARB2	0.581494	1.81e-37	postive
NRAS	ADARB2	-0.550761	5e-33	negative
NRG3	ADARB2	0.526784	7.19e-30	postive
PPP4C	ADARB2	-0.510204	7.91e-28	negative
PRKCQ	ADARB2	0.501246	9.02e-27	postive
PRLHR	ADARB2	0.563483	8.26e-35	postive
PTGDS	ADARB2	0.507597	1.62e-27	postive
SEMA4D	ADARB2	0.5286	4.23e-30	postive
SLC22A17	ADARB2	0.532642	1.28e-30	postive
THRA	ADARB2	0.520093	4.95e-29	postive
TXLNA	ADARB2	-0.515484	1.82e-28	negative
VIM	ADARB2	-0.519571	5.74e-29	negative
NFATC3	ADAT1	0.600791	1.66e-40	postive
BIRC5	ADSL	0.649145	4.19e-49	postive
CDC42	ADSL	0.596442	8.38e-40	postive
CKLF	ADSL	0.589047	1.24e-38	postive
CMTM4	ADSL	-0.524407	1.43e-29	negative
CYLD	ADSL	-0.524661	1.33e-29	negative
IFNGR2	ADSL	0.543641	4.61e-32	postive
MANF	ADSL	0.504366	3.9e-27	postive
MIF	ADSL	0.683504	3.11e-56	postive
MYDGF	ADSL	0.630641	1.24e-45	postive
PPIA	ADSL	0.64555	2.07e-48	postive
PPP4C	ADSL	0.629301	2.16e-45	postive
PRDX2	ADSL	0.571561	5.55e-36	postive
PSMB8	ADSL	0.529861	2.92e-30	postive
PSMC1	ADSL	0.506931	1.94e-27	postive
PSMC4	ADSL	0.562984	9.73e-35	postive
PSMC6	ADSL	0.651456	1.48e-49	postive
PSMD13	ADSL	0.627969	3.75e-45	postive
PSMD14	ADSL	0.645397	2.21e-48	postive
PSMD8	ADSL	0.720597	4.01e-65	postive
PSME1	ADSL	0.507541	1.64e-27	postive
RHOA	ADSL	0.507022	1.89e-27	postive
TK2	ADSL	-0.525886	9.34e-30	negative
TMSB10	ADSL	0.58467	5.92e-38	postive
TMSB4X	ADSL	0.538829	2e-31	postive
TPT1	ADSL	0.555137	1.24e-33	postive
AKT3	ADSS	0.662055	1.13e-51	postive
AEN	AEN	1	0	postive
TNFRSF10B	AEN	0.673135	5.57e-54	postive
ZYX	AEN	0.539185	1.8e-31	postive
ACVR2B	AFF2	0.531952	1.58e-30	postive
BMPR2	AFF2	0.540162	1.34e-31	postive
FGF12	AFF2	0.507397	1.71e-27	postive
FGF13	AFF2	0.555488	1.11e-33	postive
GSK3B	AFF2	0.507671	1.59e-27	postive
MAPK8	AFF2	0.596303	8.82e-40	postive
MAPT	AFF2	0.614968	7.13e-43	postive
PAK3	AFF2	0.571706	5.29e-36	postive
PAK5	AFF2	0.507866	1.5e-27	postive
PIK3R1	AFF2	0.59549	1.19e-39	postive
SEMA4G	AFF2	0.522272	2.65e-29	postive
TNFRSF1A	AFF2	-0.508425	1.29e-27	negative
BIRC5	AHCY	0.613286	1.38e-42	postive
CALR	AHCY	0.594585	1.66e-39	postive
CD320	AHCY	0.621809	4.65e-44	postive
CDC42	AHCY	0.592898	3.07e-39	postive
CKLF	AHCY	0.636994	8.47e-47	postive
CMTM4	AHCY	-0.518752	7.24e-29	negative
CYLD	AHCY	-0.535085	6.2e-31	negative
FABP7	AHCY	0.576436	1.05e-36	postive
IFNGR2	AHCY	0.571157	6.37e-36	postive
MANF	AHCY	0.516269	1.46e-28	postive
MIF	AHCY	0.632469	5.76e-46	postive
MYDGF	AHCY	0.709037	3.34e-62	postive
NENF	AHCY	0.500669	1.05e-26	postive
NRG3	AHCY	-0.53356	9.77e-31	negative
PPARA	AHCY	-0.519683	5.56e-29	negative
PPIA	AHCY	0.721728	2.04e-65	postive
PPP4C	AHCY	0.699365	7.23e-60	postive
PRDX2	AHCY	0.644399	3.43e-48	postive
PSMB8	AHCY	0.56234	1.2e-34	postive
PSMC1	AHCY	0.562159	1.28e-34	postive
PSMC2	AHCY	0.53299	1.16e-30	postive
PSMC3	AHCY	0.546691	1.79e-32	postive
PSMC4	AHCY	0.643081	6.11e-48	postive
PSMC6	AHCY	0.63474	2.21e-46	postive
PSMD13	AHCY	0.659738	3.34e-51	postive
PSMD14	AHCY	0.692108	3.56e-58	postive
PSMD8	AHCY	0.798068	2.3e-89	postive
PSME1	AHCY	0.553787	1.91e-33	postive
RABEP1	AHCY	-0.51923	6.32e-29	negative
S100A16	AHCY	0.514633	2.31e-28	postive
TMSB10	AHCY	0.59672	7.56e-40	postive
TMSB4X	AHCY	0.560003	2.58e-34	postive
TPT1	AHCY	0.517176	1.13e-28	postive
TRPC4AP	AHCY	0.599842	2.37e-40	postive
COLEC12	AHNAK2	0.597659	5.34e-40	postive
AIMP1	AIMP1	1	0	postive
NCK1	AIMP1	0.553204	2.3e-33	postive
PGRMC2	AIMP1	0.543495	4.82e-32	postive
PSMD14	AIMP2	0.50831	1.33e-27	postive
CBL	AKAP13	0.539011	1.9e-31	postive
IREB2	AKAP13	0.539908	1.44e-31	postive
NFAT5	AKAP13	0.52381	1.7e-29	postive
PSMD13	AKAP13	-0.511051	6.26e-28	negative
SOS1	AKAP13	0.527078	6.6e-30	postive
SP1	AKAP13	0.623691	2.17e-44	postive
UBR1	AKAP13	0.563605	7.93e-35	postive
GDNF	ALDH18A1	0.508722	1.19e-27	postive
TRIM27	ALDH18A1	0.514153	2.64e-28	postive
ADM	ALDOA	0.552975	2.48e-33	postive
GPI	ALDOA	0.552902	2.54e-33	postive
PSMC1	ALKBH1	0.573771	2.62e-36	postive
PSMC6	ALKBH1	0.672156	8.99e-54	postive
CYLD	ALKBH2	-0.585756	4.03e-38	negative
PRDX2	ALKBH2	0.540906	1.07e-31	postive
PSMD13	ALKBH2	0.528345	4.56e-30	postive
PSMD4	ALKBH2	0.550445	5.52e-33	postive
RAC3	ALKBH2	0.54313	5.39e-32	postive
BECN1	ALKBH7	-0.526263	8.37e-30	negative
BRAF	ALKBH7	-0.541348	9.31e-32	negative
CBL	ALKBH7	-0.5437	4.52e-32	negative
CD320	ALKBH7	0.724405	4.06e-66	postive
CKLF	ALKBH7	0.526848	7.06e-30	postive
CYLD	ALKBH7	-0.516641	1.31e-28	negative
MAP2K2	ALKBH7	0.615744	5.25e-43	postive
MIF	ALKBH7	0.607736	1.19e-41	postive
MYDGF	ALKBH7	0.628402	3.14e-45	postive
NENF	ALKBH7	0.748841	6.35e-73	postive
NFAT5	ALKBH7	-0.5634	8.49e-35	negative
NR2C2	ALKBH7	-0.577527	7.21e-37	negative
PPP4C	ALKBH7	0.641315	1.32e-47	postive
PRDX2	ALKBH7	0.713629	2.4e-63	postive
PSMC3	ALKBH7	0.603274	6.52e-41	postive
PSMD13	ALKBH7	0.670408	2.1e-53	postive
PSMD4	ALKBH7	0.602982	7.28e-41	postive
PSMD8	ALKBH7	0.610355	4.33e-42	postive
PSME1	ALKBH7	0.554876	1.35e-33	postive
RFXANK	ALKBH7	0.712209	5.45e-63	postive
SOS1	ALKBH7	-0.519337	6.13e-29	negative
TMSB10	ALKBH7	0.535925	4.82e-31	postive
UBR1	ALKBH7	-0.510723	6.85e-28	negative
VEGFB	ALKBH7	0.547601	1.35e-32	postive
CBL	ALKBH8	0.610674	3.83e-42	postive
CREB1	ALKBH8	0.562187	1.26e-34	postive
GSK3B	ALKBH8	0.586594	2.99e-38	postive
NFAT5	ALKBH8	0.531175	1.98e-30	postive
NR2C2	ALKBH8	0.535094	6.18e-31	postive
PAK2	ALKBH8	0.512113	4.66e-28	postive
PIK3CA	ALKBH8	0.513333	3.32e-28	postive
SOS1	ALKBH8	0.634543	2.4e-46	postive
SOS2	ALKBH8	0.551324	4.18e-33	postive
UBR1	ALKBH8	0.54192	7.81e-32	postive
ADRM1	ALYREF	0.688468	2.4e-57	postive
ARAF	ALYREF	0.505756	2.67e-27	postive
BIRC5	ALYREF	0.687816	3.37e-57	postive
CD320	ALYREF	0.58068	2.41e-37	postive
CYLD	ALYREF	-0.516348	1.43e-28	negative
DAXX	ALYREF	0.641014	1.5e-47	postive
HDGF	ALYREF	0.606709	1.76e-41	postive
MANF	ALYREF	0.532594	1.3e-30	postive
MAP2K2	ALYREF	0.623946	1.95e-44	postive
NR2F6	ALYREF	0.592203	3.96e-39	postive
PPARA	ALYREF	-0.516608	1.33e-28	negative
PPP4C	ALYREF	0.64662	1.29e-48	postive
PSMC3	ALYREF	0.610495	4.1e-42	postive
PSMD3	ALYREF	0.660389	2.47e-51	postive
PSMD4	ALYREF	0.626001	8.44e-45	postive
RAC3	ALYREF	0.576267	1.11e-36	postive
RFXANK	ALYREF	0.591953	4.34e-39	postive
TMSB15A	ALYREF	0.525953	9.16e-30	postive
TOR2A	ALYREF	0.536281	4.33e-31	postive
TRIM27	ALYREF	0.508042	1.43e-27	postive
GRK2	AMPD2	0.530138	2.69e-30	postive
ACVR2B	ANG	-0.58456	6.15e-38	negative
ADM	ANG	0.630955	1.09e-45	postive
APOBEC3C	ANG	0.540685	1.14e-31	postive
APOBEC3F	ANG	0.616812	3.44e-43	postive
APOBEC3G	ANG	0.597374	5.93e-40	postive
B2M	ANG	0.558848	3.76e-34	postive
BCL10	ANG	0.531753	1.67e-30	postive
BCL3	ANG	0.622831	3.07e-44	postive
BMPR2	ANG	-0.509521	9.55e-28	negative
C3	ANG	0.503607	4.78e-27	postive
C5AR1	ANG	0.543496	4.81e-32	postive
CALR	ANG	0.583763	8.16e-38	postive
CD14	ANG	0.535866	4.9e-31	postive
CD74	ANG	0.51624	1.47e-28	postive
CD86	ANG	0.50945	9.73e-28	postive
CDC42	ANG	0.589447	1.07e-38	postive
CKLF	ANG	0.57673	9.5e-37	postive
CMTM3	ANG	0.507693	1.58e-27	postive
CMTM7	ANG	0.505772	2.66e-27	postive
CTF1	ANG	0.55533	1.17e-33	postive
CTSB	ANG	0.56836	1.63e-35	postive
CXCL16	ANG	0.524176	1.53e-29	postive
CXCR4	ANG	0.536763	3.74e-31	postive
FAS	ANG	0.636156	1.21e-46	postive
FCER1G	ANG	0.615361	6.11e-43	postive
FCGR2B	ANG	0.578969	4.37e-37	postive
FCGR3A	ANG	0.56595	3.65e-35	postive
FCGRT	ANG	0.642073	9.48e-48	postive
FPR1	ANG	0.54189	7.89e-32	postive
GMFG	ANG	0.594561	1.67e-39	postive
GRN	ANG	0.525802	9.57e-30	postive
GSK3B	ANG	-0.548084	1.16e-32	negative
HCST	ANG	0.556316	8.51e-34	postive
HDGFL3	ANG	-0.570595	7.7e-36	negative
HFE	ANG	0.627422	4.7e-45	postive
HLA-DMA	ANG	0.55405	1.76e-33	postive
HLA-DMB	ANG	0.541233	9.64e-32	postive
HLA-DRA	ANG	0.522415	2.55e-29	postive
IFNGR2	ANG	0.660704	2.13e-51	postive
IL10RB	ANG	0.623262	2.58e-44	postive
IL13RA1	ANG	0.511494	5.54e-28	postive
ISG20	ANG	0.525665	9.96e-30	postive
ITGB2	ANG	0.520531	4.36e-29	postive
LTBR	ANG	0.511908	4.94e-28	postive
MAPK8	ANG	-0.568705	1.45e-35	negative
MAPT	ANG	-0.640186	2.15e-47	negative
MICA	ANG	0.53967	1.55e-31	postive
MR1	ANG	0.514867	2.16e-28	postive
MSR1	ANG	0.614094	1.01e-42	postive
MYDGF	ANG	0.593127	2.83e-39	postive
NAMPT	ANG	0.608378	9.3e-42	postive
NR1D2	ANG	-0.518386	8.03e-29	negative
NR2C2	ANG	-0.50924	1.03e-27	negative
OSMR	ANG	0.551036	4.58e-33	postive
PLAUR	ANG	0.51389	2.84e-28	postive
PLSCR1	ANG	0.54746	1.41e-32	postive
PPIA	ANG	0.504614	3.64e-27	postive
PPP4C	ANG	0.500851	1e-26	postive
PRKCA	ANG	-0.517744	9.63e-29	negative
PSMB8	ANG	0.501278	8.94e-27	postive
PSMC2	ANG	0.531118	2.02e-30	postive
PSME1	ANG	0.50253	6.39e-27	postive
RABEP1	ANG	-0.594435	1.75e-39	negative
RAC2	ANG	0.566984	2.59e-35	postive
RELB	ANG	0.534918	6.51e-31	postive
RHOA	ANG	0.526563	7.67e-30	postive
RNASE2	ANG	0.633507	3.72e-46	postive
RNASE3	ANG	0.533678	9.43e-31	postive
S100A10	ANG	0.683855	2.6e-56	postive
S100A11	ANG	0.687893	3.24e-57	postive
S100A13	ANG	0.525347	1.09e-29	postive
S100A16	ANG	0.511466	5.58e-28	postive
S100A6	ANG	0.631615	8.24e-46	postive
S100A8	ANG	0.503252	5.26e-27	postive
S100A9	ANG	0.5223	2.63e-29	postive
SEMA4G	ANG	-0.535503	5.47e-31	negative
SEMA6B	ANG	-0.507047	1.88e-27	negative
SERPINA3	ANG	0.50772	1.56e-27	postive
SOS2	ANG	-0.523395	1.92e-29	negative
SPP1	ANG	0.544498	3.53e-32	postive
TANK	ANG	0.512533	4.15e-28	postive
TGFB1	ANG	0.51908	6.6e-29	postive
THRA	ANG	-0.510857	6.6e-28	negative
TMSB10	ANG	0.642459	8.01e-48	postive
TMSB4X	ANG	0.656833	1.28e-50	postive
TNFRSF11B	ANG	0.517746	9.63e-29	postive
TNFRSF14	ANG	0.538897	1.96e-31	postive
TNFRSF1A	ANG	0.669686	2.99e-53	postive
TNFSF12	ANG	0.545044	2.98e-32	postive
TYROBP	ANG	0.597851	4.97e-40	postive
UNC93B1	ANG	0.546862	1.7e-32	postive
VIM	ANG	0.683145	3.74e-56	postive
ADAR	ANKFY1	0.532488	1.34e-30	postive
ADCYAP1R1	ANKFY1	0.522682	2.36e-29	postive
AHNAK	ANKFY1	0.525371	1.08e-29	postive
BMPR2	ANKFY1	0.541394	9.18e-32	postive
CBL	ANKFY1	0.673159	5.51e-54	postive
CMTM4	ANKFY1	0.539428	1.67e-31	postive
FGF2	ANKFY1	0.542608	6.33e-32	postive
MANF	ANKFY1	-0.533448	1.01e-30	negative
MAPK1	ANKFY1	0.5118	5.09e-28	postive
MIF	ANKFY1	-0.57828	5.56e-37	negative
MYDGF	ANKFY1	-0.596024	9.77e-40	negative
NENF	ANKFY1	-0.6145	8.58e-43	negative
NFAT5	ANKFY1	0.615337	6.17e-43	postive
NR2C2	ANKFY1	0.649281	3.94e-49	postive
NR3C1	ANKFY1	0.528466	4.4e-30	postive
PIK3CA	ANKFY1	0.507568	1.63e-27	postive
PPARA	ANKFY1	0.639043	3.52e-47	postive
PPIA	ANKFY1	-0.512248	4.49e-28	negative
PPP4C	ANKFY1	-0.504115	4.17e-27	negative
PRKCA	ANKFY1	0.559713	2.84e-34	postive
PSMC3	ANKFY1	-0.503232	5.29e-27	negative
PSMD13	ANKFY1	-0.544552	3.48e-32	negative
PSMD8	ANKFY1	-0.525608	1.01e-29	negative
PTPN11	ANKFY1	0.640459	1.91e-47	postive
RABEP1	ANKFY1	0.534207	8.06e-31	postive
SEM1	ANKFY1	-0.51965	5.61e-29	negative
SEMA6A	ANKFY1	0.521884	2.96e-29	postive
SOS1	ANKFY1	0.619961	9.79e-44	postive
SOS2	ANKFY1	0.532559	1.32e-30	postive
SP1	ANKFY1	0.500298	1.16e-26	postive
TMSB10	ANKFY1	-0.627518	4.52e-45	negative
UBR1	ANKFY1	0.561246	1.72e-34	postive
HDGF	ANP32B	0.545393	2.68e-32	postive
ACVR2B	ANXA1	-0.559091	3.47e-34	negative
ANGPT1	ANXA1	0.524026	1.6e-29	postive
APOBEC3C	ANXA1	0.558147	4.72e-34	postive
APOBEC3F	ANXA1	0.606115	2.21e-41	postive
APOBEC3G	ANXA1	0.591191	5.72e-39	postive
B2M	ANXA1	0.50755	1.64e-27	postive
BCL10	ANXA1	0.554009	1.78e-33	postive
CDC42	ANXA1	0.542658	6.23e-32	postive
CMTM6	ANXA1	0.572086	4.65e-36	postive
CTF1	ANXA1	0.62513	1.21e-44	postive
FAS	ANXA1	0.637283	7.48e-47	postive
FCGR2B	ANXA1	0.50193	7.51e-27	postive
HFE	ANXA1	0.704631	3.98e-61	postive
HLA-DRA	ANXA1	0.515238	1.95e-28	postive
HSPA5	ANXA1	0.538293	2.36e-31	postive
IFNGR2	ANXA1	0.561225	1.73e-34	postive
IL10RB	ANXA1	0.565167	4.73e-35	postive
IL13RA1	ANXA1	0.532487	1.34e-30	postive
IL13RA2	ANXA1	0.561973	1.36e-34	postive
LTBP1	ANXA1	0.510987	6.37e-28	postive
MAPK8	ANXA1	-0.58057	2.5e-37	negative
MAPT	ANXA1	-0.608263	9.72e-42	negative
MICA	ANXA1	0.557695	5.46e-34	postive
MR1	ANXA1	0.608406	9.2e-42	postive
NAMPT	ANXA1	0.541827	8.04e-32	postive
OSMR	ANXA1	0.577694	6.81e-37	postive
PDIA3	ANXA1	0.570401	8.22e-36	postive
PLSCR1	ANXA1	0.59312	2.83e-39	postive
PSMC2	ANXA1	0.590116	8.44e-39	postive
S100A10	ANXA1	0.707992	6.03e-62	postive
S100A11	ANXA1	0.596842	7.22e-40	postive
S100A13	ANXA1	0.576088	1.18e-36	postive
S100A16	ANXA1	0.510569	7.15e-28	postive
S100A6	ANXA1	0.575345	1.53e-36	postive
SEMA4G	ANXA1	-0.567261	2.36e-35	negative
SEMA6B	ANXA1	-0.556395	8.3e-34	negative
SLC22A17	ANXA1	-0.553373	2.18e-33	negative
TANK	ANXA1	0.635455	1.63e-46	postive
THRA	ANXA1	-0.515919	1.61e-28	negative
TMSB4X	ANXA1	0.578632	4.92e-37	postive
TNC	ANXA1	0.555777	1.01e-33	postive
TNFRSF11B	ANXA1	0.650017	2.84e-49	postive
TNFRSF12A	ANXA1	0.58241	1.31e-37	postive
TNFRSF14	ANXA1	0.513928	2.81e-28	postive
TNFRSF1A	ANXA1	0.635879	1.36e-46	postive
TRIM5	ANXA1	0.527008	6.74e-30	postive
UNC93B1	ANXA1	0.500749	1.03e-26	postive
VIM	ANXA1	0.625982	8.5e-45	postive
C3AR1	ANXA11	0.512788	3.87e-28	postive
PAK1	ANXA11	0.509807	8.82e-28	postive
ACTG1	ANXA2	0.549496	7.45e-33	postive
ACVR2B	ANXA2	-0.590578	7.14e-39	negative
ADM	ANXA2	0.557722	5.41e-34	postive
ANGPTL4	ANXA2	0.534292	7.85e-31	postive
APOBEC3C	ANXA2	0.6955	5.84e-59	postive
APOBEC3F	ANXA2	0.653712	5.35e-50	postive
APOBEC3G	ANXA2	0.673409	4.87e-54	postive
B2M	ANXA2	0.587324	2.3e-38	postive
BCL10	ANXA2	0.639347	3.09e-47	postive
BCL3	ANXA2	0.742319	4.95e-71	postive
BMP1	ANXA2	0.547412	1.43e-32	postive
C5AR1	ANXA2	0.598143	4.46e-40	postive
CALR	ANXA2	0.669998	2.57e-53	postive
CCL2	ANXA2	0.608887	7.64e-42	postive
CD14	ANXA2	0.537259	3.22e-31	postive
CD40	ANXA2	0.61171	2.56e-42	postive
CD48	ANXA2	0.552196	3.17e-33	postive
CD70	ANXA2	0.5503	5.78e-33	postive
CD74	ANXA2	0.526473	7.88e-30	postive
CDC42	ANXA2	0.62706	5.46e-45	postive
CKLF	ANXA2	0.545433	2.65e-32	postive
CLCF1	ANXA2	0.652242	1.04e-49	postive
CMTM3	ANXA2	0.587318	2.31e-38	postive
CMTM4	ANXA2	-0.513254	3.4e-28	negative
CMTM6	ANXA2	0.625118	1.21e-44	postive
CMTM7	ANXA2	0.552856	2.57e-33	postive
CTSB	ANXA2	0.667413	8.92e-53	postive
CTSL	ANXA2	0.550403	5.6e-33	postive
CTSS	ANXA2	0.528014	5.02e-30	postive
CXCR4	ANXA2	0.543017	5.58e-32	postive
ENG	ANXA2	0.536774	3.73e-31	postive
FAM3C	ANXA2	0.51383	2.89e-28	postive
FAS	ANXA2	0.730982	7.08e-68	postive
FCER1G	ANXA2	0.641742	1.09e-47	postive
FCGR2B	ANXA2	0.700497	3.9e-60	postive
FCGR3A	ANXA2	0.572293	4.33e-36	postive
FCGRT	ANXA2	0.546514	1.89e-32	postive
FURIN	ANXA2	0.612928	1.59e-42	postive
GMFG	ANXA2	0.566342	3.2e-35	postive
GRN	ANXA2	0.609181	6.82e-42	postive
HDGFL3	ANXA2	-0.525431	1.07e-29	negative
HFE	ANXA2	0.697146	2.41e-59	postive
HLA-DMA	ANXA2	0.522402	2.55e-29	postive
HLA-DMB	ANXA2	0.508246	1.35e-27	postive
HLA-DRA	ANXA2	0.547893	1.23e-32	postive
HSPA5	ANXA2	0.655225	2.68e-50	postive
ICAM1	ANXA2	0.575773	1.32e-36	postive
IFNGR2	ANXA2	0.76008	2.52e-76	postive
IL10RB	ANXA2	0.730687	8.51e-68	postive
IL13RA1	ANXA2	0.569495	1.12e-35	postive
IL4R	ANXA2	0.524838	1.27e-29	postive
ISG20	ANXA2	0.541355	9.29e-32	postive
LCP2	ANXA2	0.525652	1e-29	postive
LIF	ANXA2	0.559122	3.44e-34	postive
LIMS1	ANXA2	0.682191	6.07e-56	postive
LTBR	ANXA2	0.553469	2.12e-33	postive
LYZ	ANXA2	0.510076	8.19e-28	postive
MANF	ANXA2	0.566708	2.84e-35	postive
MAPK8	ANXA2	-0.561554	1.56e-34	negative
MAPT	ANXA2	-0.681428	8.94e-56	negative
MDK	ANXA2	0.665632	2.09e-52	postive
MICA	ANXA2	0.577013	8.61e-37	postive
MR1	ANXA2	0.51832	8.18e-29	postive
MSR1	ANXA2	0.650302	2.49e-49	postive
MYDGF	ANXA2	0.631309	9.36e-46	postive
NAMPT	ANXA2	0.617313	2.82e-43	postive
NFKBIZ	ANXA2	0.634412	2.54e-46	postive
NOX4	ANXA2	0.53621	4.42e-31	postive
NRP1	ANXA2	0.700261	4.43e-60	postive
OSMR	ANXA2	0.712216	5.43e-63	postive
PDIA3	ANXA2	0.703708	6.64e-61	postive
PLAU	ANXA2	0.699805	5.69e-60	postive
PLAUR	ANXA2	0.713304	2.9e-63	postive
PLSCR1	ANXA2	0.586464	3.13e-38	postive
PLXNB1	ANXA2	-0.505867	2.59e-27	negative
PLXND1	ANXA2	0.543915	4.23e-32	postive
PPIA	ANXA2	0.61536	6.11e-43	postive
PRF1	ANXA2	0.526753	7.26e-30	postive
PROCR	ANXA2	0.594065	2.01e-39	postive
PSMC1	ANXA2	0.553443	2.14e-33	postive
PSMC2	ANXA2	0.651037	1.79e-49	postive
PTX3	ANXA2	0.545335	2.73e-32	postive
RABEP1	ANXA2	-0.583914	7.73e-38	negative
RAC2	ANXA2	0.687809	3.39e-57	postive
RELB	ANXA2	0.64651	1.35e-48	postive
RHOA	ANXA2	0.572171	4.52e-36	postive
RNASE2	ANXA2	0.579648	3.45e-37	postive
S100A10	ANXA2	0.71132	9.08e-63	postive
S100A11	ANXA2	0.849175	3.94e-112	postive
S100A13	ANXA2	0.537203	3.28e-31	postive
S100A16	ANXA2	0.598533	3.86e-40	postive
S100A6	ANXA2	0.673797	4.03e-54	postive
SDC1	ANXA2	0.604531	4.05e-41	postive
SDC2	ANXA2	0.631534	8.52e-46	postive
SEMA4G	ANXA2	-0.564042	6.87e-35	negative
SHC1	ANXA2	0.668124	6.34e-53	postive
SLC22A17	ANXA2	-0.566286	3.26e-35	negative
SOCS3	ANXA2	0.591378	5.34e-39	postive
SOS2	ANXA2	-0.512432	4.27e-28	negative
SPP1	ANXA2	0.556207	8.82e-34	postive
TANK	ANXA2	0.54783	1.25e-32	postive
TGFB1	ANXA2	0.649691	3.28e-49	postive
THRA	ANXA2	-0.638477	4.49e-47	negative
TMSB10	ANXA2	0.682654	4.8e-56	postive
TMSB4X	ANXA2	0.654449	3.82e-50	postive
TNC	ANXA2	0.591426	5.25e-39	postive
TNFRSF10B	ANXA2	0.521136	3.67e-29	postive
TNFRSF11A	ANXA2	0.519814	5.35e-29	postive
TNFRSF11B	ANXA2	0.562913	9.96e-35	postive
TNFRSF12A	ANXA2	0.731864	4.08e-68	postive
TNFRSF14	ANXA2	0.551193	4.36e-33	postive
TNFRSF1A	ANXA2	0.737039	1.53e-69	postive
TNFSF10	ANXA2	0.532402	1.38e-30	postive
TNFSF8	ANXA2	0.505336	2.99e-27	postive
TPM2	ANXA2	0.538262	2.38e-31	postive
TYMP	ANXA2	0.55201	3.37e-33	postive
TYROBP	ANXA2	0.563983	7e-35	postive
ULBP2	ANXA2	0.57026	8.62e-36	postive
ULBP3	ANXA2	0.52504	1.19e-29	postive
UNC93B1	ANXA2	0.53226	1.44e-30	postive
VIM	ANXA2	0.701621	2.1e-60	postive
ZYX	ANXA2	0.535616	5.28e-31	postive
ACVR2B	ANXA5	-0.597903	4.88e-40	negative
APOBEC3F	ANXA5	0.563598	7.95e-35	postive
APOBEC3G	ANXA5	0.537522	2.98e-31	postive
BMP2	ANXA5	-0.531946	1.58e-30	negative
CALR	ANXA5	0.583531	8.86e-38	postive
CASP3	ANXA5	0.659136	4.42e-51	postive
CDC42	ANXA5	0.517749	9.62e-29	postive
CDNF	ANXA5	-0.523904	1.66e-29	negative
CKLF	ANXA5	0.505119	3.18e-27	postive
CMTM3	ANXA5	0.585678	4.14e-38	postive
FABP7	ANXA5	0.630833	1.14e-45	postive
FAM3C	ANXA5	0.597416	5.84e-40	postive
FGFRL1	ANXA5	0.546812	1.72e-32	postive
GNAI1	ANXA5	-0.623062	2.8e-44	negative
HDAC1	ANXA5	0.509695	9.1e-28	postive
HFE	ANXA5	0.573814	2.58e-36	postive
HNF4G	ANXA5	0.502432	6.56e-27	postive
IFNGR2	ANXA5	0.594401	1.77e-39	postive
IL17RC	ANXA5	0.557539	5.74e-34	postive
IL1RAP	ANXA5	0.536434	4.13e-31	postive
MAPK8	ANXA5	-0.632752	5.11e-46	negative
MAPT	ANXA5	-0.640852	1.61e-47	negative
MDK	ANXA5	0.525964	9.13e-30	postive
MICA	ANXA5	0.557531	5.76e-34	postive
MYDGF	ANXA5	0.569297	1.19e-35	postive
NOX4	ANXA5	0.511957	4.87e-28	postive
PAK3	ANXA5	-0.521342	3.46e-29	negative
PAK5	ANXA5	-0.543868	4.29e-32	negative
PDGFA	ANXA5	0.634897	2.07e-46	postive
PLSCR1	ANXA5	0.588955	1.28e-38	postive
PPIA	ANXA5	0.616347	4.14e-43	postive
PPP4C	ANXA5	0.503701	4.66e-27	postive
PSMB8	ANXA5	0.523327	1.96e-29	postive
PSMC2	ANXA5	0.603266	6.54e-41	postive
PSMC4	ANXA5	0.606516	1.9e-41	postive
PSMD8	ANXA5	0.577363	7.63e-37	postive
PTN	ANXA5	0.569924	9.66e-36	postive
RABEP1	ANXA5	-0.516155	1.51e-28	negative
RAC1	ANXA5	0.56311	9.33e-35	postive
S100A13	ANXA5	0.57761	7.01e-37	postive
S100A16	ANXA5	0.684433	1.93e-56	postive
S100A6	ANXA5	0.547346	1.46e-32	postive
SEMA4G	ANXA5	-0.590625	7.02e-39	negative
SEMA6B	ANXA5	-0.574905	1.78e-36	negative
TANK	ANXA5	0.590496	7.35e-39	postive
TFRC	ANXA5	0.504134	4.15e-27	postive
THRA	ANXA5	-0.550961	4.69e-33	negative
TMSB4X	ANXA5	0.547105	1.57e-32	postive
TNFRSF12A	ANXA5	0.612445	1.92e-42	postive
TNFRSF19	ANXA5	0.545244	2.81e-32	postive
TNFRSF1A	ANXA5	0.626218	7.72e-45	postive
TRIM5	ANXA5	0.564319	6.27e-35	postive
UNC93B1	ANXA5	0.500063	1.24e-26	postive
VAV3	ANXA5	0.63153	8.53e-46	postive
VIM	ANXA5	0.607988	1.08e-41	postive
ZYX	ANXA5	0.608885	7.65e-42	postive
AP3B1	AP3B1	1	0	postive
CANX	AP3B1	0.581611	1.74e-37	postive
ERAP1	AP3B1	0.536928	3.56e-31	postive
HSPA4	AP3B1	0.530633	2.33e-30	postive
ZC3HAV1	AP3B1	0.508798	1.16e-27	postive
PSMC6	APEX1	0.503859	4.47e-27	postive
TRIM27	APEX1	0.535738	5.09e-31	postive
ARAF	APEX2	0.635653	1.5e-46	postive
BCL10	APEX2	0.527385	6.04e-30	postive
CALR	APEX2	0.514384	2.48e-28	postive
CMTM3	APEX2	0.512222	4.52e-28	postive
GRN	APEX2	0.603342	6.35e-41	postive
HDAC1	APEX2	0.533474	1e-30	postive
IL10RB	APEX2	0.56496	5.07e-35	postive
MANF	APEX2	0.525217	1.13e-29	postive
MICB	APEX2	0.528519	4.33e-30	postive
PDIA3	APEX2	0.551643	3.78e-33	postive
RAC2	APEX2	0.512177	4.58e-28	postive
SHC1	APEX2	0.516494	1.37e-28	postive
TXLNA	APEX2	0.597334	6.02e-40	postive
APOBEC3C	APOBEC3B	0.572909	3.52e-36	postive
APOBEC3F	APOBEC3B	0.613767	1.14e-42	postive
APOBEC3G	APOBEC3B	0.580688	2.4e-37	postive
CALR	APOBEC3B	0.589169	1.19e-38	postive
CKLF	APOBEC3B	0.515475	1.82e-28	postive
IFNGR2	APOBEC3B	0.617997	2.15e-43	postive
IL10RB	APOBEC3B	0.552425	2.95e-33	postive
MANF	APOBEC3B	0.554904	1.34e-33	postive
MAPT	APOBEC3B	-0.5211	3.71e-29	negative
MDK	APOBEC3B	0.61483	7.53e-43	postive
MYDGF	APOBEC3B	0.573488	2.89e-36	postive
NRP1	APOBEC3B	0.500069	1.24e-26	postive
PDIA3	APOBEC3B	0.515397	1.87e-28	postive
PPIA	APOBEC3B	0.625696	9.56e-45	postive
PSMB8	APOBEC3B	0.54168	8.41e-32	postive
PSMC1	APOBEC3B	0.52427	1.49e-29	postive
PSMC2	APOBEC3B	0.585939	3.77e-38	postive
PSMD8	APOBEC3B	0.509796	8.85e-28	postive
S100A11	APOBEC3B	0.522503	2.48e-29	postive
S100A16	APOBEC3B	0.547583	1.36e-32	postive
SHC1	APOBEC3B	0.5269	6.96e-30	postive
TMSB10	APOBEC3B	0.522224	2.69e-29	postive
TNFRSF1A	APOBEC3B	0.511699	5.23e-28	postive
ACVR2B	APOBEC3C	-0.58736	2.27e-38	negative
ADA2	APOBEC3C	0.67614	1.27e-54	postive
APOBEC3C	APOBEC3C	1	0	postive
APOBEC3F	APOBEC3C	0.812222	5.82e-95	postive
APOBEC3G	APOBEC3C	0.797573	3.54e-89	postive
B2M	APOBEC3C	0.636535	1.03e-46	postive
BCL3	APOBEC3C	0.594365	1.8e-39	postive
BST2	APOBEC3C	0.515253	1.94e-28	postive
BTK	APOBEC3C	0.59076	6.68e-39	postive
C3	APOBEC3C	0.598439	4e-40	postive
C3AR1	APOBEC3C	0.586671	2.91e-38	postive
CALR	APOBEC3C	0.546841	1.71e-32	postive
CCL2	APOBEC3C	0.520177	4.83e-29	postive
CCL5	APOBEC3C	0.576561	1.01e-36	postive
CCR1	APOBEC3C	0.555446	1.13e-33	postive
CCR5	APOBEC3C	0.66227	1.02e-51	postive
CCRL2	APOBEC3C	0.548547	1e-32	postive
CD14	APOBEC3C	0.574123	2.32e-36	postive
CD3D	APOBEC3C	0.589214	1.17e-38	postive
CD3E	APOBEC3C	0.586097	3.56e-38	postive
CD4	APOBEC3C	0.610877	3.54e-42	postive
CD40	APOBEC3C	0.624032	1.89e-44	postive
CD48	APOBEC3C	0.638917	3.71e-47	postive
CD74	APOBEC3C	0.716485	4.55e-64	postive
CD86	APOBEC3C	0.615482	5.82e-43	postive
CMTM3	APOBEC3C	0.504316	3.95e-27	postive
CMTM6	APOBEC3C	0.612517	1.87e-42	postive
CMTM7	APOBEC3C	0.609296	6.53e-42	postive
CSF2RB	APOBEC3C	0.525668	9.95e-30	postive
CSF3R	APOBEC3C	0.54153	8.8e-32	postive
CTF1	APOBEC3C	0.504028	4.27e-27	postive
CTSB	APOBEC3C	0.646285	1.49e-48	postive
CTSS	APOBEC3C	0.651134	1.72e-49	postive
CXCL16	APOBEC3C	0.639954	2.38e-47	postive
CXCR4	APOBEC3C	0.506386	2.25e-27	postive
CYBB	APOBEC3C	0.625919	8.73e-45	postive
ENG	APOBEC3C	0.545705	2.43e-32	postive
FAS	APOBEC3C	0.596969	6.89e-40	postive
FCER1G	APOBEC3C	0.687538	3.9e-57	postive
FCGR2B	APOBEC3C	0.612822	1.66e-42	postive
FCGR3A	APOBEC3C	0.663754	5.09e-52	postive
FCGRT	APOBEC3C	0.599609	2.58e-40	postive
FPR1	APOBEC3C	0.51635	1.43e-28	postive
FURIN	APOBEC3C	0.517867	9.3e-29	postive
GMFG	APOBEC3C	0.571519	5.64e-36	postive
GRN	APOBEC3C	0.67622	1.22e-54	postive
HCK	APOBEC3C	0.580225	2.83e-37	postive
HCST	APOBEC3C	0.532872	1.2e-30	postive
HDGFL3	APOBEC3C	-0.555863	9.85e-34	negative
HFE	APOBEC3C	0.774756	4.66e-81	postive
HLA-B	APOBEC3C	0.509508	9.58e-28	postive
HLA-DMA	APOBEC3C	0.695456	5.98e-59	postive
HLA-DMB	APOBEC3C	0.652387	9.75e-50	postive
HLA-DOA	APOBEC3C	0.534113	8.29e-31	postive
HLA-DPA1	APOBEC3C	0.608764	8.02e-42	postive
HLA-DPB1	APOBEC3C	0.648467	5.67e-49	postive
HLA-DQA1	APOBEC3C	0.623911	1.98e-44	postive
HLA-DQB1	APOBEC3C	0.576944	8.82e-37	postive
HLA-DRA	APOBEC3C	0.670387	2.13e-53	postive
HLA-DRB1	APOBEC3C	0.655654	2.2e-50	postive
IFNGR2	APOBEC3C	0.70822	5.3e-62	postive
IKBKE	APOBEC3C	0.620973	6.52e-44	postive
IL10RA	APOBEC3C	0.554603	1.47e-33	postive
IL10RB	APOBEC3C	0.677014	8.2e-55	postive
IL12RB1	APOBEC3C	0.564022	6.91e-35	postive
IL13RA1	APOBEC3C	0.6868	5.71e-57	postive
IL16	APOBEC3C	0.56678	2.77e-35	postive
IL17RA	APOBEC3C	0.513315	3.34e-28	postive
IL18	APOBEC3C	0.565021	4.97e-35	postive
IL2RG	APOBEC3C	0.639777	2.56e-47	postive
IL4R	APOBEC3C	0.553587	2.04e-33	postive
IRF5	APOBEC3C	0.554174	1.69e-33	postive
ITGB2	APOBEC3C	0.672065	9.4e-54	postive
LCP2	APOBEC3C	0.660174	2.73e-51	postive
LIMS1	APOBEC3C	0.64523	2.38e-48	postive
LTBR	APOBEC3C	0.567635	2.08e-35	postive
LYN	APOBEC3C	0.673501	4.66e-54	postive
LYZ	APOBEC3C	0.587938	1.85e-38	postive
MAPK8	APOBEC3C	-0.594744	1.56e-39	negative
MAPT	APOBEC3C	-0.648201	6.38e-49	negative
MDK	APOBEC3C	0.532216	1.46e-30	postive
MICA	APOBEC3C	0.52107	3.74e-29	postive
MR1	APOBEC3C	0.699237	7.75e-60	postive
MSR1	APOBEC3C	0.645287	2.32e-48	postive
NAMPT	APOBEC3C	0.525703	9.85e-30	postive
NFKBIZ	APOBEC3C	0.502258	6.88e-27	postive
NOD2	APOBEC3C	0.514746	2.24e-28	postive
NRP1	APOBEC3C	0.608963	7.42e-42	postive
OSMR	APOBEC3C	0.650644	2.14e-49	postive
PDIA3	APOBEC3C	0.612096	2.2e-42	postive
PIK3CG	APOBEC3C	0.563893	7.21e-35	postive
PIK3R5	APOBEC3C	0.543655	4.59e-32	postive
PLAUR	APOBEC3C	0.556903	7.05e-34	postive
PLSCR1	APOBEC3C	0.594628	1.63e-39	postive
PLXNB2	APOBEC3C	0.514324	2.52e-28	postive
PLXND1	APOBEC3C	0.532813	1.22e-30	postive
PPARG	APOBEC3C	0.517313	1.09e-28	postive
PROCR	APOBEC3C	0.589158	1.19e-38	postive
PSMC2	APOBEC3C	0.611023	3.34e-42	postive
PTAFR	APOBEC3C	0.520612	4.27e-29	postive
PTGER4	APOBEC3C	0.548555	1e-32	postive
PTPN6	APOBEC3C	0.579448	3.7e-37	postive
PTPRC	APOBEC3C	0.54621	2.08e-32	postive
RAC2	APOBEC3C	0.721982	1.75e-65	postive
RELB	APOBEC3C	0.554967	1.31e-33	postive
RNASE2	APOBEC3C	0.582034	1.5e-37	postive
S100A10	APOBEC3C	0.560099	2.5e-34	postive
S100A11	APOBEC3C	0.763154	2.75e-77	postive
S100A16	APOBEC3C	0.548509	1.01e-32	postive
SDC1	APOBEC3C	0.520588	4.29e-29	postive
SDC2	APOBEC3C	0.502547	6.36e-27	postive
SECTM1	APOBEC3C	0.535308	5.8e-31	postive
SEMA4G	APOBEC3C	-0.541243	9.61e-32	negative
SHC1	APOBEC3C	0.636349	1.12e-46	postive
SLC22A17	APOBEC3C	-0.557298	6.2e-34	negative
SPP1	APOBEC3C	0.552539	2.85e-33	postive
SYK	APOBEC3C	0.552048	3.33e-33	postive
TANK	APOBEC3C	0.511374	5.72e-28	postive
TAPBPL	APOBEC3C	0.571989	4.8e-36	postive
TGFB1	APOBEC3C	0.643055	6.18e-48	postive
TGFBR2	APOBEC3C	0.621637	4.99e-44	postive
THRA	APOBEC3C	-0.545106	2.93e-32	negative
TLR1	APOBEC3C	0.63874	4.01e-47	postive
TLR2	APOBEC3C	0.603638	5.68e-41	postive
TLR3	APOBEC3C	0.556014	9.38e-34	postive
TLR7	APOBEC3C	0.52036	4.58e-29	postive
TLR8	APOBEC3C	0.562457	1.16e-34	postive
TMSB4X	APOBEC3C	0.57256	3.96e-36	postive
TNFRSF10A	APOBEC3C	0.537118	3.36e-31	postive
TNFRSF10B	APOBEC3C	0.511643	5.31e-28	postive
TNFRSF10C	APOBEC3C	0.57414	2.31e-36	postive
TNFRSF11A	APOBEC3C	0.61579	5.16e-43	postive
TNFRSF14	APOBEC3C	0.661797	1.28e-51	postive
TNFRSF1A	APOBEC3C	0.725104	2.65e-66	postive
TNFRSF1B	APOBEC3C	0.513745	2.96e-28	postive
TNFSF10	APOBEC3C	0.565127	4.8e-35	postive
TNFSF12	APOBEC3C	0.517997	8.97e-29	postive
TNFSF13	APOBEC3C	0.608384	9.28e-42	postive
TNFSF8	APOBEC3C	0.632163	6.55e-46	postive
TRIM22	APOBEC3C	0.550229	5.91e-33	postive
TRIM5	APOBEC3C	0.54558	2.53e-32	postive
TYMP	APOBEC3C	0.57823	5.65e-37	postive
TYROBP	APOBEC3C	0.623928	1.97e-44	postive
UNC93B1	APOBEC3C	0.657799	8.22e-51	postive
VAV1	APOBEC3C	0.569977	9.49e-36	postive
VIM	APOBEC3C	0.556321	8.5e-34	postive
ACVR2B	APOBEC3D	-0.539398	1.69e-31	negative
ADA2	APOBEC3D	0.606131	2.2e-41	postive
APOBEC3C	APOBEC3D	0.746075	4.09e-72	postive
APOBEC3F	APOBEC3D	0.82581	8.45e-101	postive
APOBEC3G	APOBEC3D	0.835495	2.8e-105	postive
B2M	APOBEC3D	0.660391	2.47e-51	postive
BCL3	APOBEC3D	0.504325	3.94e-27	postive
BST2	APOBEC3D	0.597972	4.75e-40	postive
CALR	APOBEC3D	0.524138	1.55e-29	postive
CCL5	APOBEC3D	0.646275	1.5e-48	postive
CCR5	APOBEC3D	0.62636	7.28e-45	postive
CCRL2	APOBEC3D	0.509209	1.04e-27	postive
CD3D	APOBEC3D	0.662437	9.47e-52	postive
CD3E	APOBEC3D	0.702301	1.45e-60	postive
CD4	APOBEC3D	0.506507	2.18e-27	postive
CD40	APOBEC3D	0.621051	6.31e-44	postive
CD48	APOBEC3D	0.685772	9.72e-57	postive
CD72	APOBEC3D	0.524862	1.26e-29	postive
CD74	APOBEC3D	0.639522	2.86e-47	postive
CD8A	APOBEC3D	0.599502	2.69e-40	postive
CMTM7	APOBEC3D	0.515946	1.6e-28	postive
CSF3R	APOBEC3D	0.5047	3.56e-27	postive
CTSS	APOBEC3D	0.569715	1.04e-35	postive
CXCL10	APOBEC3D	0.52659	7.61e-30	postive
CXCL16	APOBEC3D	0.523129	2.07e-29	postive
CYBB	APOBEC3D	0.503578	4.82e-27	postive
ENG	APOBEC3D	0.50426	4.01e-27	postive
FAS	APOBEC3D	0.573962	2.45e-36	postive
FCER1G	APOBEC3D	0.572233	4.42e-36	postive
FCGR2B	APOBEC3D	0.517821	9.43e-29	postive
FCGR3A	APOBEC3D	0.536035	4.66e-31	postive
FCGRT	APOBEC3D	0.589442	1.08e-38	postive
GMFG	APOBEC3D	0.50765	1.59e-27	postive
GRN	APOBEC3D	0.620538	7.76e-44	postive
HFE	APOBEC3D	0.647623	8.26e-49	postive
HLA-A	APOBEC3D	0.595128	1.36e-39	postive
HLA-B	APOBEC3D	0.620058	9.41e-44	postive
HLA-C	APOBEC3D	0.573148	3.24e-36	postive
HLA-DMA	APOBEC3D	0.599722	2.48e-40	postive
HLA-DMB	APOBEC3D	0.548218	1.11e-32	postive
HLA-DPA1	APOBEC3D	0.575629	1.39e-36	postive
HLA-DPB1	APOBEC3D	0.581977	1.53e-37	postive
HLA-DQA1	APOBEC3D	0.565862	3.76e-35	postive
HLA-DQB1	APOBEC3D	0.504336	3.93e-27	postive
HLA-DRA	APOBEC3D	0.577775	6.62e-37	postive
HLA-DRB1	APOBEC3D	0.572244	4.41e-36	postive
HLA-E	APOBEC3D	0.543662	4.57e-32	postive
HLA-F	APOBEC3D	0.528464	4.4e-30	postive
IFNGR2	APOBEC3D	0.613989	1.05e-42	postive
IKBKE	APOBEC3D	0.503903	4.42e-27	postive
IL10RB	APOBEC3D	0.62238	3.69e-44	postive
IL12RB1	APOBEC3D	0.548045	1.17e-32	postive
IL2RG	APOBEC3D	0.695748	5.11e-59	postive
IL4R	APOBEC3D	0.518838	7.07e-29	postive
IRF1	APOBEC3D	0.599616	2.58e-40	postive
ISG20	APOBEC3D	0.568351	1.64e-35	postive
ITGB2	APOBEC3D	0.550975	4.67e-33	postive
LCP2	APOBEC3D	0.600836	1.63e-40	postive
LYN	APOBEC3D	0.55376	1.93e-33	postive
LYZ	APOBEC3D	0.531935	1.58e-30	postive
MAPK8	APOBEC3D	-0.521451	3.36e-29	negative
MAPT	APOBEC3D	-0.586312	3.3e-38	negative
MDK	APOBEC3D	0.53823	2.4e-31	postive
MICA	APOBEC3D	0.539011	1.9e-31	postive
MICB	APOBEC3D	0.540113	1.36e-31	postive
MR1	APOBEC3D	0.58102	2.14e-37	postive
MSR1	APOBEC3D	0.568301	1.67e-35	postive
NRP1	APOBEC3D	0.511901	4.95e-28	postive
OAS1	APOBEC3D	0.503789	4.55e-27	postive
OSMR	APOBEC3D	0.541558	8.73e-32	postive
PDIA3	APOBEC3D	0.533156	1.1e-30	postive
PLSCR1	APOBEC3D	0.584968	5.32e-38	postive
PLXND1	APOBEC3D	0.515928	1.61e-28	postive
PML	APOBEC3D	0.540368	1.26e-31	postive
PSMB8	APOBEC3D	0.585272	4.78e-38	postive
PSMC2	APOBEC3D	0.511298	5.84e-28	postive
PSME2	APOBEC3D	0.559629	2.92e-34	postive
PTGER4	APOBEC3D	0.60568	2.62e-41	postive
RAC2	APOBEC3D	0.656667	1.38e-50	postive
RELB	APOBEC3D	0.532414	1.37e-30	postive
S100A11	APOBEC3D	0.59666	7.73e-40	postive
SECTM1	APOBEC3D	0.59602	9.79e-40	postive
SHC1	APOBEC3D	0.568002	1.84e-35	postive
SLC40A1	APOBEC3D	0.502816	5.92e-27	postive
SOCS1	APOBEC3D	0.632725	5.17e-46	postive
TAPBPL	APOBEC3D	0.515042	2.06e-28	postive
TGFB1	APOBEC3D	0.588746	1.38e-38	postive
TLR1	APOBEC3D	0.542996	5.62e-32	postive
TLR2	APOBEC3D	0.526874	7.01e-30	postive
TLR8	APOBEC3D	0.516973	1.2e-28	postive
TNFRSF11A	APOBEC3D	0.522664	2.37e-29	postive
TNFRSF14	APOBEC3D	0.764958	7.36e-78	postive
TNFRSF1A	APOBEC3D	0.582076	1.48e-37	postive
TNFSF10	APOBEC3D	0.583007	1.06e-37	postive
TNFSF8	APOBEC3D	0.562725	1.06e-34	postive
TRIM22	APOBEC3D	0.615499	5.78e-43	postive
TRIM5	APOBEC3D	0.581608	1.74e-37	postive
TYMP	APOBEC3D	0.557745	5.37e-34	postive
TYROBP	APOBEC3D	0.525699	9.86e-30	postive
UNC93B1	APOBEC3D	0.638324	4.79e-47	postive
BMPR2	AQR	0.561354	1.66e-34	postive
BRAF	AQR	0.564796	5.35e-35	postive
CBL	AQR	0.615818	5.1e-43	postive
CMTM1	AQR	0.511189	6.03e-28	postive
CREB1	AQR	0.667661	7.92e-53	postive
GSK3B	AQR	0.562317	1.21e-34	postive
IREB2	AQR	0.713092	3.28e-63	postive
KRAS	AQR	0.536002	4.71e-31	postive
MIF	AQR	-0.506551	2.15e-27	negative
NENF	AQR	-0.528525	4.33e-30	negative
NFAT5	AQR	0.577006	8.63e-37	postive
NFATC3	AQR	0.515096	2.03e-28	postive
NFYA	AQR	0.604587	3.96e-41	postive
NR2C2	AQR	0.696373	3.65e-59	postive
NR3C1	AQR	0.512371	4.34e-28	postive
SOS1	AQR	0.67237	8.1e-54	postive
SOS2	AQR	0.528434	4.44e-30	postive
SP1	AQR	0.577342	7.69e-37	postive
UBR1	AQR	0.816442	1.01e-96	postive
ACVR1B	ARF3	0.561101	1.8e-34	postive
ARRB1	ARF3	0.50307	5.53e-27	postive
CHGA	ARF3	0.503793	4.55e-27	postive
CHGB	ARF3	0.505896	2.57e-27	postive
FGF13	ARF3	0.505566	2.81e-27	postive
HDAC1	ARF3	-0.520471	4.44e-29	negative
MAPK1	ARF3	0.540286	1.29e-31	postive
NR3C2	ARF3	0.504329	3.93e-27	postive
PAK3	ARF3	0.522074	2.81e-29	postive
PPP3CA	ARF3	0.568391	1.62e-35	postive
PPP3CB	ARF3	0.524893	1.25e-29	postive
PRKCB	ARF3	0.564522	5.86e-35	postive
PRKCG	ARF3	0.501108	9.36e-27	postive
SEMA4A	ARF3	0.503123	5.45e-27	postive
THRB	ARF3	0.623938	1.96e-44	postive
BCL10	ARF4	0.566233	3.32e-35	postive
CALR	ARF4	0.50901	1.1e-27	postive
CDC42	ARF4	0.67323	5.32e-54	postive
CKLF	ARF4	0.560191	2.43e-34	postive
CMTM6	ARF4	0.698977	8.93e-60	postive
IFNGR2	ARF4	0.629866	1.71e-45	postive
IL10RB	ARF4	0.518341	8.13e-29	postive
MANF	ARF4	0.601643	1.21e-40	postive
MAPT	ARF4	-0.554503	1.52e-33	negative
MDK	ARF4	0.512622	4.05e-28	postive
MYDGF	ARF4	0.549838	6.69e-33	postive
NCK1	ARF4	0.523914	1.65e-29	postive
NRAS	ARF4	0.567235	2.38e-35	postive
PPIA	ARF4	0.624069	1.86e-44	postive
PPP4C	ARF4	0.507513	1.66e-27	postive
PSMC1	ARF4	0.557777	5.32e-34	postive
PSMC2	ARF4	0.696918	2.72e-59	postive
PSMD14	ARF4	0.638962	3.64e-47	postive
PSMD6	ARF4	0.702075	1.64e-60	postive
PSMD8	ARF4	0.540545	1.19e-31	postive
RBP1	ARF4	0.51126	5.91e-28	postive
RHOA	ARF4	0.708576	4.33e-62	postive
S100A11	ARF4	0.529841	2.94e-30	postive
S100A6	ARF4	0.501784	7.81e-27	postive
SEM1	ARF4	0.500705	1.04e-26	postive
SLC22A17	ARF4	-0.526309	8.26e-30	negative
THRA	ARF4	-0.533562	9.77e-31	negative
TMSB10	ARF4	0.570364	8.33e-36	postive
TMSB4X	ARF4	0.575818	1.3e-36	postive
ADA2	ARL11	0.657594	9.03e-51	postive
APOBEC3C	ARL11	0.651479	1.47e-49	postive
APOBEC3F	ARL11	0.602157	9.94e-41	postive
APOBEC3G	ARL11	0.686071	8.33e-57	postive
AQP9	ARL11	0.745642	5.47e-72	postive
B2M	ARL11	0.700476	3.94e-60	postive
BLNK	ARL11	0.56811	1.78e-35	postive
BTK	ARL11	0.842511	1.03e-108	postive
C3	ARL11	0.73309	1.89e-68	postive
C3AR1	ARL11	0.80811	2.75e-93	postive
C5AR1	ARL11	0.667947	6.9e-53	postive
CCL18	ARL11	0.584404	6.5e-38	postive
CCL2	ARL11	0.556776	7.34e-34	postive
CCL20	ARL11	0.618468	1.78e-43	postive
CCL5	ARL11	0.571587	5.51e-36	postive
CCL8	ARL11	0.528957	3.81e-30	postive
CCR1	ARL11	0.818002	2.2e-97	postive
CCR5	ARL11	0.75603	4.46e-75	postive
CCRL2	ARL11	0.871885	3.7e-125	postive
CD14	ARL11	0.840221	1.42e-107	postive
CD3D	ARL11	0.628591	2.9e-45	postive
CD3E	ARL11	0.51853	7.71e-29	postive
CD4	ARL11	0.834267	1.07e-104	postive
CD40	ARL11	0.683849	2.61e-56	postive
CD48	ARL11	0.721394	2.49e-65	postive
CD72	ARL11	0.626408	7.14e-45	postive
CD74	ARL11	0.735949	3.07e-69	postive
CD86	ARL11	0.868289	6.16e-123	postive
CKLF	ARL11	0.520771	4.08e-29	postive
CMTM6	ARL11	0.627731	4.14e-45	postive
CMTM7	ARL11	0.756493	3.22e-75	postive
CRLF3	ARL11	0.556919	7.01e-34	postive
CSF1R	ARL11	0.654208	4.27e-50	postive
CSF2RA	ARL11	0.655817	2.05e-50	postive
CSF2RB	ARL11	0.768205	6.67e-79	postive
CSF3R	ARL11	0.818244	1.73e-97	postive
CTSB	ARL11	0.7661	3.18e-78	postive
CTSL	ARL11	0.693716	1.51e-58	postive
CTSS	ARL11	0.924869	8.7e-169	postive
CXCL12	ARL11	0.525109	1.17e-29	postive
CXCL16	ARL11	0.752816	4.18e-74	postive
CXCL5	ARL11	0.55603	9.33e-34	postive
CYBB	ARL11	0.765941	3.57e-78	postive
EBI3	ARL11	0.65593	1.94e-50	postive
ENG	ARL11	0.553657	1.99e-33	postive
FAS	ARL11	0.646327	1.47e-48	postive
FCER1G	ARL11	0.898986	2.02e-144	postive
FCGR2B	ARL11	0.637757	6.11e-47	postive
FCGR3A	ARL11	0.87994	2.17e-130	postive
FCGR3B	ARL11	0.648986	4.5e-49	postive
FCGRT	ARL11	0.760543	1.81e-76	postive
FGR	ARL11	0.612969	1.56e-42	postive
FPR1	ARL11	0.832115	1.1e-103	postive
GMFG	ARL11	0.840227	1.41e-107	postive
GRN	ARL11	0.691688	4.44e-58	postive
HAMP	ARL11	0.730744	8.21e-68	postive
HCK	ARL11	0.878055	3.92e-129	postive
HCST	ARL11	0.74725	1.86e-72	postive
HFE	ARL11	0.648642	5.24e-49	postive
HLA-DMA	ARL11	0.821691	5.61e-99	postive
HLA-DMB	ARL11	0.911762	1.66e-155	postive
HLA-DOA	ARL11	0.623551	2.3e-44	postive
HLA-DPA1	ARL11	0.652334	9.99e-50	postive
HLA-DPB1	ARL11	0.700898	3.13e-60	postive
HLA-DQA1	ARL11	0.683401	3.28e-56	postive
HLA-DQB1	ARL11	0.718103	1.76e-64	postive
HLA-DRA	ARL11	0.793087	1.68e-87	postive
HLA-DRB1	ARL11	0.725976	1.56e-66	postive
HLA-DRB5	ARL11	0.552582	2.81e-33	postive
HLA-E	ARL11	0.542696	6.16e-32	postive
HMOX1	ARL11	0.603884	5.18e-41	postive
IFNGR1	ARL11	0.686527	6.58e-57	postive
IFNGR2	ARL11	0.617721	2.4e-43	postive
IKBKE	ARL11	0.620465	7.99e-44	postive
IL10	ARL11	0.816934	6.25e-97	postive
IL10RA	ARL11	0.789358	3.88e-86	postive
IL10RB	ARL11	0.695529	5.75e-59	postive
IL12RB1	ARL11	0.752576	4.93e-74	postive
IL13RA1	ARL11	0.642914	6.57e-48	postive
IL15RA	ARL11	0.579141	4.12e-37	postive
IL16	ARL11	0.776816	9.44e-82	postive
IL17RA	ARL11	0.527427	5.96e-30	postive
IL18	ARL11	0.822902	1.65e-99	postive
IL1R2	ARL11	0.535915	4.83e-31	postive
IL21R	ARL11	0.601992	1.06e-40	postive
IL2RA	ARL11	0.58414	7.14e-38	postive
IL2RG	ARL11	0.685531	1.1e-56	postive
IL4R	ARL11	0.688123	2.88e-57	postive
IL6R	ARL11	0.569468	1.13e-35	postive
IL7R	ARL11	0.547792	1.27e-32	postive
IRF5	ARL11	0.741632	7.77e-71	postive
ITGAL	ARL11	0.613769	1.14e-42	postive
ITGB2	ARL11	0.851124	3.66e-113	postive
LCP2	ARL11	0.803645	1.63e-91	postive
LGMN	ARL11	0.636442	1.07e-46	postive
LTBR	ARL11	0.619115	1.37e-43	postive
LYN	ARL11	0.85874	2.44e-117	postive
LYZ	ARL11	0.769189	3.2e-79	postive
MAP3K8	ARL11	0.783813	3.66e-84	postive
MAPT	ARL11	-0.505985	2.51e-27	negative
MR1	ARL11	0.654487	3.76e-50	postive
MSR1	ARL11	0.893279	6.11e-140	postive
NAMPT	ARL11	0.523222	2.02e-29	postive
NFATC2	ARL11	0.527008	6.74e-30	postive
NFKBIZ	ARL11	0.528741	4.06e-30	postive
NOD2	ARL11	0.675099	2.12e-54	postive
OLR1	ARL11	0.56718	2.42e-35	postive
OSM	ARL11	0.51406	2.71e-28	postive
PIK3CG	ARL11	0.698649	1.07e-59	postive
PIK3R5	ARL11	0.765741	4.14e-78	postive
PLAUR	ARL11	0.568215	1.71e-35	postive
PLCG2	ARL11	0.710487	1.46e-62	postive
PLSCR1	ARL11	0.573436	2.94e-36	postive
PLTP	ARL11	0.663893	4.76e-52	postive
PPARG	ARL11	0.729818	1.46e-67	postive
PTAFR	ARL11	0.774719	4.79e-81	postive
PTGER4	ARL11	0.554154	1.7e-33	postive
PTPN6	ARL11	0.817762	2.78e-97	postive
PTPRC	ARL11	0.741432	8.86e-71	postive
RAC2	ARL11	0.741879	6.61e-71	postive
RHOA	ARL11	0.511276	5.88e-28	postive
RNASE2	ARL11	0.803613	1.68e-91	postive
RNASE3	ARL11	0.73765	1.03e-69	postive
S100A11	ARL11	0.723558	6.77e-66	postive
S100A12	ARL11	0.538596	2.15e-31	postive
S100A8	ARL11	0.793289	1.42e-87	postive
S100A9	ARL11	0.808418	2.07e-93	postive
SLC11A1	ARL11	0.65329	6.48e-50	postive
SLC29A3	ARL11	0.557022	6.78e-34	postive
SPP1	ARL11	0.765074	6.76e-78	postive
SYK	ARL11	0.81569	2.1e-96	postive
TGFB1	ARL11	0.592985	2.98e-39	postive
TGFBR1	ARL11	0.611755	2.51e-42	postive
TGFBR2	ARL11	0.667132	1.02e-52	postive
TLR1	ARL11	0.815544	2.41e-96	postive
TLR2	ARL11	0.81554	2.42e-96	postive
TLR3	ARL11	0.527447	5.93e-30	postive
TLR7	ARL11	0.720586	4.03e-65	postive
TLR8	ARL11	0.786579	3.85e-85	postive
TMSB4X	ARL11	0.687079	4.95e-57	postive
TNFRSF10A	ARL11	0.512419	4.28e-28	postive
TNFRSF10C	ARL11	0.513771	2.94e-28	postive
TNFRSF11A	ARL11	0.619105	1.38e-43	postive
TNFRSF14	ARL11	0.575403	1.5e-36	postive
TNFRSF1A	ARL11	0.533358	1.04e-30	postive
TNFRSF1B	ARL11	0.736771	1.82e-69	postive
TNFSF10	ARL11	0.564843	5.27e-35	postive
TNFSF12	ARL11	0.582887	1.11e-37	postive
TNFSF13	ARL11	0.757693	1.38e-75	postive
TNFSF8	ARL11	0.853462	2.03e-114	postive
TYMP	ARL11	0.685117	1.36e-56	postive
TYROBP	ARL11	0.916458	5.18e-160	postive
UNC93B1	ARL11	0.643497	5.09e-48	postive
VAV1	ARL11	0.811113	1.66e-94	postive
CMTM6	ARL5A	0.582854	1.12e-37	postive
CRLF3	ARL5A	0.524086	1.57e-29	postive
CYBB	ARL5A	0.515173	1.99e-28	postive
DCK	ARL5A	0.600293	2e-40	postive
IFNGR1	ARL5A	0.525125	1.16e-29	postive
LYN	ARL5A	0.52371	1.75e-29	postive
NCK1	ARL5A	0.572145	4.56e-36	postive
PIK3CG	ARL5A	0.516041	1.56e-28	postive
PTPRC	ARL5A	0.567103	2.49e-35	postive
TANK	ARL5A	0.561815	1.43e-34	postive
TGFBR1	ARL5A	0.58874	1.39e-38	postive
TLR1	ARL5A	0.537255	3.23e-31	postive
TLR7	ARL5A	0.507855	1.51e-27	postive
CACYBP	ARL6	0.522185	2.72e-29	postive
PAK1	ARL6	0.559131	3.43e-34	postive
PPP3R1	ARL6	0.569075	1.28e-35	postive
ACVR1B	ARPP21	0.521936	2.92e-29	postive
ACVR2B	ARPP21	0.612815	1.66e-42	postive
APOBEC3C	ARPP21	-0.506596	2.13e-27	negative
APOBEC3F	ARPP21	-0.565164	4.74e-35	negative
APOBEC3G	ARPP21	-0.531264	1.93e-30	negative
ARAF	ARPP21	-0.50105	9.5e-27	negative
ARRB1	ARPP21	0.521312	3.49e-29	postive
BCL10	ARPP21	-0.57013	9.01e-36	negative
BMP2	ARPP21	0.579105	4.17e-37	postive
BMPR2	ARPP21	0.5949	1.48e-39	postive
BRAF	ARPP21	0.56575	3.9e-35	postive
CALR	ARPP21	-0.61208	2.21e-42	negative
CDC42	ARPP21	-0.547067	1.59e-32	negative
CHGA	ARPP21	0.589172	1.19e-38	postive
CHGB	ARPP21	0.668856	4.46e-53	postive
CKLF	ARPP21	-0.524232	1.51e-29	negative
CMTM3	ARPP21	-0.634357	2.6e-46	negative
CMTM4	ARPP21	0.50534	2.99e-27	postive
CMTM6	ARPP21	-0.524315	1.47e-29	negative
CRHR1	ARPP21	0.637323	7.36e-47	postive
ECD	ARPP21	0.562226	1.25e-34	postive
FCGRT	ARPP21	-0.552812	2.61e-33	negative
FGF12	ARPP21	0.575877	1.27e-36	postive
FGF13	ARPP21	0.643425	5.25e-48	postive
GNAI1	ARPP21	0.587727	1.99e-38	postive
GRN	ARPP21	-0.52024	4.74e-29	negative
GSK3B	ARPP21	0.520121	4.91e-29	postive
HDAC1	ARPP21	-0.615024	6.98e-43	negative
HDGFL3	ARPP21	0.528618	4.21e-30	postive
HFE	ARPP21	-0.547784	1.27e-32	negative
IFNGR2	ARPP21	-0.605954	2.35e-41	negative
IL10RB	ARPP21	-0.569804	1.01e-35	negative
IRF3	ARPP21	-0.510865	6.59e-28	negative
LANCL1	ARPP21	0.506387	2.25e-27	postive
MANF	ARPP21	-0.521037	3.78e-29	negative
MAPK8	ARPP21	0.682718	4.64e-56	postive
MAPT	ARPP21	0.717432	2.61e-64	postive
MDK	ARPP21	-0.519028	6.69e-29	negative
MYDGF	ARPP21	-0.566466	3.07e-35	negative
NR1D2	ARPP21	0.604268	4.48e-41	postive
NR2C2	ARPP21	0.555868	9.83e-34	postive
NRG3	ARPP21	0.581401	1.87e-37	postive
OSMR	ARPP21	-0.50545	2.9e-27	negative
PAK3	ARPP21	0.728916	2.56e-67	postive
PAK5	ARPP21	0.685524	1.1e-56	postive
PDIA3	ARPP21	-0.557746	5.37e-34	negative
PIK3CB	ARPP21	0.580044	3.01e-37	postive
PIK3R1	ARPP21	0.594739	1.57e-39	postive
PPP3CA	ARPP21	0.614984	7.09e-43	postive
PPP3CB	ARPP21	0.698438	1.2e-59	postive
PPP4C	ARPP21	-0.57995	3.11e-37	negative
PRKCA	ARPP21	0.642306	8.56e-48	postive
PRKCB	ARPP21	0.594922	1.47e-39	postive
PSMC2	ARPP21	-0.582334	1.35e-37	negative
PSMC4	ARPP21	-0.521377	3.43e-29	negative
RABEP1	ARPP21	0.548465	1.03e-32	postive
RAC1	ARPP21	-0.515665	1.73e-28	negative
RELB	ARPP21	-0.50143	8.59e-27	negative
RHOA	ARPP21	-0.5405	1.21e-31	negative
S100A11	ARPP21	-0.538477	2.23e-31	negative
S100A16	ARPP21	-0.522959	2.18e-29	negative
S100A6	ARPP21	-0.514364	2.49e-28	negative
SEM1	ARPP21	-0.516567	1.34e-28	negative
SEMA4A	ARPP21	0.512419	4.28e-28	postive
SEMA4G	ARPP21	0.634847	2.11e-46	postive
SEMA6B	ARPP21	0.633975	3.05e-46	postive
SLC22A17	ARPP21	0.61537	6.09e-43	postive
SLIT1	ARPP21	0.563637	7.85e-35	postive
SOS2	ARPP21	0.540853	1.08e-31	postive
SSTR1	ARPP21	0.598929	3.33e-40	postive
SSTR2	ARPP21	0.547338	1.46e-32	postive
THRA	ARPP21	0.606428	1.97e-41	postive
THRB	ARPP21	0.540632	1.16e-31	postive
TMSB10	ARPP21	-0.519343	6.12e-29	negative
TMSB4X	ARPP21	-0.537953	2.61e-31	negative
TNFRSF14	ARPP21	-0.550182	6e-33	negative
TNFRSF1A	ARPP21	-0.629125	2.33e-45	negative
TRIM5	ARPP21	-0.506467	2.2e-27	negative
TXLNA	ARPP21	-0.500774	1.02e-26	negative
UNC93B1	ARPP21	-0.527926	5.16e-30	negative
VIM	ARPP21	-0.609505	6.02e-42	negative
ZYX	ARPP21	-0.503941	4.37e-27	negative
BMP2	ASCC1	0.536281	4.33e-31	postive
BMPR1A	ASCC1	0.558718	3.92e-34	postive
CALCRL	ASCC1	0.619555	1.15e-43	postive
CHUK	ASCC1	0.526934	6.89e-30	postive
ECD	ASCC1	0.561656	1.5e-34	postive
FAM3C	ASCC1	-0.515862	1.64e-28	negative
GPI	ASCC1	-0.503786	4.56e-27	negative
MAPK8	ASCC1	0.591956	4.33e-39	postive
MAPT	ASCC1	0.603731	5.49e-41	postive
SEMA4G	ASCC1	0.604467	4.15e-41	postive
THRA	ASCC1	0.562607	1.1e-34	postive
TNFRSF14	ASCC1	-0.540325	1.27e-31	negative
VAV3	ASCC1	-0.525054	1.19e-29	negative
ZYX	ASCC1	-0.526742	7.28e-30	negative
PLXNB2	ASCC2	0.525992	9.06e-30	postive
IFNAR1	ASCC3	0.598116	4.51e-40	postive
IGF2R	ASCC3	0.525309	1.1e-29	postive
UBR1	ASCC3	0.514927	2.13e-28	postive
ACVR1B	ASIC2	0.546451	1.93e-32	postive
ADRB1	ASIC2	0.605749	2.55e-41	postive
ARRB1	ASIC2	0.62056	7.7e-44	postive
CCK	ASIC2	0.737605	1.06e-69	postive
CHGA	ASIC2	0.685238	1.28e-56	postive
CRHR1	ASIC2	0.63236	6.03e-46	postive
FABP3	ASIC2	0.52658	7.63e-30	postive
FGF13	ASIC2	0.702676	1.18e-60	postive
GREM2	ASIC2	0.689389	1.49e-57	postive
HTR1A	ASIC2	0.530414	2.48e-30	postive
IL34	ASIC2	0.521114	3.7e-29	postive
LANCL1	ASIC2	0.50586	2.6e-27	postive
MAP2K1	ASIC2	0.664994	2.83e-52	postive
OPRL1	ASIC2	0.631971	7.1e-46	postive
PAK1	ASIC2	0.740891	1.26e-70	postive
PAK3	ASIC2	0.67836	4.19e-55	postive
PAK5	ASIC2	0.542154	7.27e-32	postive
PIK3CB	ASIC2	0.51108	6.21e-28	postive
PPP3CA	ASIC2	0.741212	1.02e-70	postive
PPP3CB	ASIC2	0.769625	2.31e-79	postive
PPP3R1	ASIC2	0.736711	1.89e-69	postive
PRKCB	ASIC2	0.794962	3.39e-88	postive
PRKCG	ASIC2	0.778962	1.76e-82	postive
PTGDR2	ASIC2	0.507562	1.63e-27	postive
PTK2B	ASIC2	0.656096	1.8e-50	postive
RBP4	ASIC2	0.669674	3e-53	postive
SEMA4A	ASIC2	0.609362	6.36e-42	postive
SST	ASIC2	0.681099	1.06e-55	postive
THRB	ASIC2	0.783424	5.01e-84	postive
VIP	ASIC2	0.760121	2.45e-76	postive
VIPR1	ASIC2	0.723558	6.77e-66	postive
BIRC5	ASPM	0.54328	5.15e-32	postive
CMTM1	ASPM	0.587017	2.57e-38	postive
CREB1	ASPM	0.541115	1e-31	postive
ELAVL1	ASPM	0.668733	4.73e-53	postive
NFATC3	ASPM	0.531164	1.99e-30	postive
NRAS	ASPM	0.530068	2.75e-30	postive
PSMD11	ASPM	0.601239	1.4e-40	postive
TMSB15A	ASPM	0.528586	4.25e-30	postive
TNFRSF11B	ASS1	0.507696	1.57e-27	postive
BIRC5	ATAD2	0.52702	6.72e-30	postive
CMTM1	ATAD2	0.591388	5.32e-39	postive
CREB1	ATAD2	0.53109	2.03e-30	postive
ELAVL1	ATAD2	0.639031	3.54e-47	postive
PSMD11	ATAD2	0.505857	2.6e-27	postive
ACVR2A	ATF7IP	0.591679	4.79e-39	postive
ACVR2B	ATF7IP	0.706362	1.51e-61	postive
BACH2	ATF7IP	0.531925	1.59e-30	postive
BMPR2	ATF7IP	0.569284	1.2e-35	postive
CALCRL	ATF7IP	0.543069	5.49e-32	postive
CBL	ATF7IP	0.651252	1.63e-49	postive
CMTM1	ATF7IP	0.641906	1.02e-47	postive
CREB1	ATF7IP	0.641573	1.18e-47	postive
GSK3B	ATF7IP	0.658355	6.35e-51	postive
IREB2	ATF7IP	0.510793	6.72e-28	postive
KLRC3	ATF7IP	0.563176	9.13e-35	postive
KLRC4	ATF7IP	0.550181	6e-33	postive
MAPK8	ATF7IP	0.645872	1.79e-48	postive
MAPT	ATF7IP	0.506823	2e-27	postive
NFAT5	ATF7IP	0.54039	1.25e-31	postive
NR2C2	ATF7IP	0.623214	2.63e-44	postive
PAK2	ATF7IP	0.593207	2.75e-39	postive
PIK3CA	ATF7IP	0.515331	1.9e-28	postive
RABEP1	ATF7IP	0.510779	6.75e-28	postive
S100A16	ATF7IP	-0.50041	1.13e-26	negative
SOS1	ATF7IP	0.741567	8.11e-71	postive
SOS2	ATF7IP	0.67542	1.81e-54	postive
TCF7L2	ATF7IP	0.542295	6.97e-32	postive
TNFRSF14	ATF7IP	-0.503826	4.51e-27	negative
TNFSF12	ATF7IP	-0.536531	4.01e-31	negative
UBR1	ATF7IP	0.523896	1.66e-29	postive
APOBEC3C	ATL3	0.558933	3.66e-34	postive
APOBEC3F	ATL3	0.55436	1.59e-33	postive
APOBEC3G	ATL3	0.52631	8.26e-30	postive
BCL10	ATL3	0.576504	1.03e-36	postive
CD74	ATL3	0.513008	3.64e-28	postive
CHGB	ATL3	-0.505166	3.14e-27	negative
CMTM6	ATL3	0.510123	8.09e-28	postive
CYBB	ATL3	0.514115	2.67e-28	postive
ERAP1	ATL3	0.509087	1.08e-27	postive
HFE	ATL3	0.575225	1.59e-36	postive
HLA-DMA	ATL3	0.501552	8.31e-27	postive
IL13RA1	ATL3	0.534082	8.36e-31	postive
LIMS1	ATL3	0.509664	9.18e-28	postive
LTBP1	ATL3	0.513967	2.78e-28	postive
LYN	ATL3	0.523828	1.7e-29	postive
MAPT	ATL3	-0.502844	5.87e-27	negative
MR1	ATL3	0.599918	2.3e-40	postive
NFATC2	ATL3	0.503895	4.42e-27	postive
NFKB1	ATL3	0.549601	7.2e-33	postive
OSMR	ATL3	0.566601	2.94e-35	postive
PLSCR1	ATL3	0.507805	1.53e-27	postive
S100A10	ATL3	0.520411	4.52e-29	postive
S100A11	ATL3	0.508342	1.32e-27	postive
SEMA6B	ATL3	-0.508299	1.33e-27	negative
SLC22A17	ATL3	-0.52696	6.83e-30	negative
STAT3	ATL3	0.543607	4.65e-32	postive
TANK	ATL3	0.538332	2.33e-31	postive
TLR1	ATL3	0.535046	6.27e-31	postive
TNC	ATL3	0.591603	4.92e-39	postive
TNFRSF1A	ATL3	0.561783	1.44e-34	postive
TRIM5	ATL3	0.516641	1.32e-28	postive
TXLNA	ATL3	0.507468	1.68e-27	postive
VIM	ATL3	0.594294	1.85e-39	postive
AKT1	ATP13A1	0.513802	2.91e-28	postive
ELAVL1	ATP13A1	0.509943	8.5e-28	postive
MAP2K2	ATP13A1	0.532638	1.29e-30	postive
NR2F6	ATP13A1	0.603544	5.89e-41	postive
OGFR	ATP13A1	0.553902	1.84e-33	postive
RABEP2	ATP13A1	0.517901	9.21e-29	postive
S1PR2	ATP13A1	0.526808	7.15e-30	postive
SKIV2L	ATP13A1	0.559479	3.06e-34	postive
TYK2	ATP13A1	0.676817	9.04e-55	postive
GPI	ATP1A1	0.556567	7.85e-34	postive
OSMR	ATP1A1	0.514945	2.12e-28	postive
PTK2B	ATP1A1	0.556602	7.76e-34	postive
TNC	ATP1A1	0.513398	3.26e-28	postive
ACVR1B	ATP2A2	0.648061	6.79e-49	postive
BMPR2	ATP2A2	0.645583	2.04e-48	postive
BRAF	ATP2A2	0.61521	6.48e-43	postive
CBL	ATP2A2	0.557711	5.43e-34	postive
ESRRG	ATP2A2	0.508556	1.24e-27	postive
GMFG	ATP2A2	-0.502993	5.64e-27	negative
GSK3B	ATP2A2	0.667276	9.52e-53	postive
HCST	ATP2A2	-0.514117	2.67e-28	negative
MAPK1	ATP2A2	0.573344	3.03e-36	postive
NENF	ATP2A2	-0.509382	9.92e-28	negative
NFAT5	ATP2A2	0.618385	1.84e-43	postive
NR2C2	ATP2A2	0.623066	2.8e-44	postive
PAK3	ATP2A2	0.592218	3.94e-39	postive
PIK3CB	ATP2A2	0.508581	1.24e-27	postive
PRKCA	ATP2A2	0.512613	4.06e-28	postive
RABEP1	ATP2A2	0.506945	1.93e-27	postive
SEM1	ATP2A2	-0.542279	7e-32	negative
SOS1	ATP2A2	0.511847	5.02e-28	postive
SOS2	ATP2A2	0.517385	1.07e-28	postive
TNFSF12	ATP2A2	-0.539279	1.75e-31	negative
UBR1	ATP2A2	0.567846	1.94e-35	postive
ACVR1B	ATP6V1A	0.572816	3.63e-36	postive
ARRB1	ATP6V1A	0.61663	3.7e-43	postive
BMPR2	ATP6V1A	0.633576	3.61e-46	postive
BRAF	ATP6V1A	0.573816	2.58e-36	postive
CCK	ATP6V1A	0.657026	1.17e-50	postive
CHGA	ATP6V1A	0.660776	2.06e-51	postive
CHGB	ATP6V1A	0.501787	7.8e-27	postive
CMTM3	ATP6V1A	-0.517949	9.09e-29	negative
CRHR1	ATP6V1A	0.573587	2.79e-36	postive
FGF13	ATP6V1A	0.703661	6.82e-61	postive
FGF9	ATP6V1A	0.510396	7.5e-28	postive
GREM2	ATP6V1A	0.746515	3.05e-72	postive
GSK3B	ATP6V1A	0.561327	1.68e-34	postive
HTR1A	ATP6V1A	0.553151	2.34e-33	postive
LANCL1	ATP6V1A	0.571777	5.16e-36	postive
MAP2K1	ATP6V1A	0.700426	4.05e-60	postive
MAPK1	ATP6V1A	0.566385	3.16e-35	postive
MAPK8	ATP6V1A	0.500552	1.09e-26	postive
NFAT5	ATP6V1A	0.527113	6.54e-30	postive
NR1D2	ATP6V1A	0.570245	8.67e-36	postive
OPRL1	ATP6V1A	0.580151	2.9e-37	postive
PAK1	ATP6V1A	0.677552	6.27e-55	postive
PAK3	ATP6V1A	0.773604	1.13e-80	postive
PAK5	ATP6V1A	0.644318	3.55e-48	postive
PIK3CB	ATP6V1A	0.703514	7.4e-61	postive
PPP3CA	ATP6V1A	0.771759	4.61e-80	postive
PPP3CB	ATP6V1A	0.820819	1.35e-98	postive
PPP3R1	ATP6V1A	0.751533	1.01e-73	postive
PRKCB	ATP6V1A	0.773896	9.02e-81	postive
PRKCG	ATP6V1A	0.650672	2.11e-49	postive
PTK2B	ATP6V1A	0.533421	1.02e-30	postive
RABEP1	ATP6V1A	0.516597	1.33e-28	postive
RBP4	ATP6V1A	0.582041	1.5e-37	postive
SEMA4A	ATP6V1A	0.629657	1.86e-45	postive
SST	ATP6V1A	0.512521	4.16e-28	postive
THRB	ATP6V1A	0.785513	9.21e-85	postive
VIP	ATP6V1A	0.695332	6.39e-59	postive
VIPR1	ATP6V1A	0.648096	6.69e-49	postive
NFAT5	ATXN1	0.541991	7.65e-32	postive
CMTM1	BAZ1A	0.559834	2.73e-34	postive
CREB1	BAZ1A	0.571727	5.25e-36	postive
IREB2	BAZ1A	0.557838	5.21e-34	postive
RAF1	BAZ1A	0.542007	7.61e-32	postive
SOS1	BAZ1A	0.500093	1.23e-26	postive
SP1	BAZ1A	0.500429	1.12e-26	postive
TRIM27	BAZ1A	0.579956	3.1e-37	postive
CREB1	BAZ1B	0.584208	6.97e-38	postive
NFATC3	BAZ1B	0.597976	4.75e-40	postive
SP1	BAZ1B	0.531987	1.56e-30	postive
ZC3HAV1	BAZ1B	0.56903	1.3e-35	postive
ACVR2B	BCCIP	0.518108	8.69e-29	postive
APOBEC3F	BCCIP	-0.526148	8.66e-30	negative
BMP2	BCCIP	0.61234	2e-42	postive
CHGB	BCCIP	0.518332	8.16e-29	postive
CTF1	BCCIP	-0.513159	3.49e-28	negative
ECD	BCCIP	0.607965	1.09e-41	postive
GDNF	BCCIP	0.562478	1.15e-34	postive
HFE	BCCIP	-0.529752	3.02e-30	negative
MAPK8	BCCIP	0.554754	1.41e-33	postive
MAPT	BCCIP	0.540202	1.32e-31	postive
SEMA4G	BCCIP	0.654419	3.88e-50	postive
TNFRSF1A	BCCIP	-0.52823	4.72e-30	negative
ACVRL1	BCL6B	0.636067	1.26e-46	postive
CETP	BCL6B	0.632636	5.37e-46	postive
CYSLTR2	BCL6B	0.56619	3.37e-35	postive
DLL4	BCL6B	0.764133	1.35e-77	postive
ENG	BCL6B	0.529568	3.18e-30	postive
FLT1	BCL6B	0.586075	3.59e-38	postive
FLT4	BCL6B	0.692703	2.6e-58	postive
GPER1	BCL6B	0.532987	1.16e-30	postive
ICAM2	BCL6B	0.596719	7.56e-40	postive
KDR	BCL6B	0.717012	3.34e-64	postive
NOX4	BCL6B	0.542063	7.48e-32	postive
PDGFB	BCL6B	0.588175	1.7e-38	postive
PDGFRB	BCL6B	0.53981	1.49e-31	postive
TIE1	BCL6B	0.654507	3.72e-50	postive
TNFRSF4	BCL6B	0.544564	3.46e-32	postive
BRD8	BCLAF3	0.506052	2.47e-27	postive
CREB1	BCLAF3	0.51124	5.94e-28	postive
DDX17	BCLAF3	0.584816	5.62e-38	postive
NR2C1	BCLAF3	0.568776	1.42e-35	postive
NR2C2	BCLAF3	0.574197	2.27e-36	postive
SOS1	BCLAF3	0.612101	2.2e-42	postive
PTN	BLM	0.537159	3.32e-31	postive
ADRM1	BRAT1	0.526045	8.92e-30	postive
FLT3LG	BRAT1	0.503838	4.49e-27	postive
IRF3	BRAT1	0.503601	4.79e-27	postive
OGFR	BRAT1	0.601	1.54e-40	postive
RABEP2	BRAT1	0.559972	2.61e-34	postive
SKIV2L	BRAT1	0.514863	2.17e-28	postive
TYK2	BRAT1	0.525385	1.08e-29	postive
ELAVL1	BRCA1	0.549199	8.17e-33	postive
NFATC3	BRCA1	0.544666	3.36e-32	postive
PSMD11	BRCA1	0.55108	4.52e-33	postive
TXLNA	BRCA1	0.518834	7.07e-29	postive
BIRC5	BRIX1	0.543126	5.4e-32	postive
DAXX	BRIX1	0.560401	2.27e-34	postive
ELAVL1	BRIX1	0.505666	2.74e-27	postive
HMGB1	BRIX1	0.507292	1.76e-27	postive
MANF	BRIX1	0.502521	6.41e-27	postive
NR3C2	BRIX1	-0.509485	9.64e-28	negative
NRAS	BRIX1	0.581793	1.63e-37	postive
NRG3	BRIX1	-0.521905	2.95e-29	negative
PSMD11	BRIX1	0.536715	3.8e-31	postive
PSMD14	BRIX1	0.579255	3.96e-37	postive
B2M	BTN3A3	0.531898	1.6e-30	postive
CIITA	BTN3A3	0.666999	1.09e-52	postive
DKK1	BTN3A3	0.510481	7.33e-28	postive
GBP2	BTN3A3	0.619389	1.23e-43	postive
HLA-A	BTN3A3	0.557291	6.22e-34	postive
HLA-B	BTN3A3	0.732959	2.05e-68	postive
HLA-C	BTN3A3	0.680325	1.56e-55	postive
HLA-DOA	BTN3A3	0.588973	1.27e-38	postive
HLA-DOB	BTN3A3	0.723478	7.11e-66	postive
HLA-DPA1	BTN3A3	0.610973	3.41e-42	postive
HLA-DQA2	BTN3A3	0.602728	8.02e-41	postive
HLA-E	BTN3A3	0.633993	3.03e-46	postive
HLA-F	BTN3A3	0.662259	1.03e-51	postive
HLA-G	BTN3A3	0.64544	2.17e-48	postive
IDO1	BTN3A3	0.66917	3.83e-53	postive
IFIH1	BTN3A3	0.524711	1.31e-29	postive
IRF1	BTN3A3	0.555218	1.21e-33	postive
PSMB8	BTN3A3	0.500262	1.17e-26	postive
STAT1	BTN3A3	0.579155	4.1e-37	postive
TAP1	BTN3A3	0.649804	3.12e-49	postive
TAP2	BTN3A3	0.752551	5.02e-74	postive
TLR3	BTN3A3	0.50234	6.73e-27	postive
TNFSF13B	BTN3A3	0.704146	5.21e-61	postive
TRIM22	BTN3A3	0.500653	1.06e-26	postive
DAXX	BUD13	0.623413	2.43e-44	postive
EED	BUD13	0.520782	4.06e-29	postive
HDGF	BUD13	0.577149	8.22e-37	postive
PSMD3	BUD13	0.590763	6.68e-39	postive
TRIM27	BUD13	0.587457	2.19e-38	postive
ADRM1	BUD23	0.577681	6.84e-37	postive
ARRB1	BUD23	-0.528303	4.62e-30	negative
CD320	BUD23	0.528288	4.64e-30	postive
CMTM3	BUD23	0.502303	6.79e-27	postive
CMTM4	BUD23	-0.519752	5.45e-29	negative
MANF	BUD23	0.538343	2.32e-31	postive
MDK	BUD23	0.526822	7.12e-30	postive
MYDGF	BUD23	0.522266	2.66e-29	postive
NRG3	BUD23	-0.565301	4.53e-35	negative
PIK3CB	BUD23	-0.524649	1.34e-29	negative
PPARA	BUD23	-0.521727	3.1e-29	negative
PPIA	BUD23	0.539295	1.74e-31	postive
PPP4C	BUD23	0.57604	1.2e-36	postive
PSMC2	BUD23	0.582827	1.13e-37	postive
PSMC4	BUD23	0.522205	2.7e-29	postive
RAC1	BUD23	0.544314	3.74e-32	postive
SEM1	BUD23	0.698215	1.35e-59	postive
MAPK14	BYSL	0.837164	4.42e-106	postive
APOBEC3G	BZW1	0.50173	7.92e-27	postive
BCL10	BZW1	0.601754	1.16e-40	postive
BIRC5	BZW1	0.553888	1.85e-33	postive
CALR	BZW1	0.586339	3.27e-38	postive
CANX	BZW1	0.52601	9.01e-30	postive
CASP3	BZW1	0.69276	2.52e-58	postive
CDC42	BZW1	0.804791	5.77e-92	postive
CKLF	BZW1	0.610253	4.51e-42	postive
CMTM3	BZW1	0.516317	1.44e-28	postive
CMTM6	BZW1	0.687927	3.18e-57	postive
CRLF3	BZW1	0.535142	6.09e-31	postive
DCK	BZW1	0.540805	1.1e-31	postive
FABP7	BZW1	0.606369	2.01e-41	postive
FAM3C	BZW1	0.663182	6.67e-52	postive
HDAC1	BZW1	0.539153	1.82e-31	postive
HFE	BZW1	0.619055	1.41e-43	postive
HSPA5	BZW1	0.53788	2.67e-31	postive
IFNAR2	BZW1	0.522728	2.33e-29	postive
IFNGR2	BZW1	0.686316	7.34e-57	postive
IL1RAP	BZW1	0.524272	1.49e-29	postive
LIMS1	BZW1	0.565298	4.53e-35	postive
LRSAM1	BZW1	-0.536536	4.01e-31	negative
MANF	BZW1	0.509304	1.01e-27	postive
MAPT	BZW1	-0.603341	6.36e-41	negative
MDK	BZW1	0.568599	1.51e-35	postive
MYDGF	BZW1	0.564929	5.12e-35	postive
NAMPT	BZW1	0.524899	1.24e-29	postive
NCK1	BZW1	0.649159	4.16e-49	postive
NOX4	BZW1	0.617722	2.4e-43	postive
NRAS	BZW1	0.761589	8.53e-77	postive
NRG3	BZW1	-0.563499	8.21e-35	negative
PDK1	BZW1	0.524548	1.38e-29	postive
PLSCR1	BZW1	0.528948	3.82e-30	postive
PPIA	BZW1	0.736438	2.25e-69	postive
PPP4C	BZW1	0.599991	2.24e-40	postive
PSMC1	BZW1	0.751055	1.4e-73	postive
PSMC2	BZW1	0.788682	6.8e-86	postive
PSMC4	BZW1	0.602377	9.15e-41	postive
PSMC6	BZW1	0.549269	7.99e-33	postive
PSMD10	BZW1	0.52843	4.45e-30	postive
PSMD14	BZW1	0.767686	9.82e-79	postive
PSMD5	BZW1	0.551792	3.61e-33	postive
PSMD6	BZW1	0.586256	3.37e-38	postive
PSMD8	BZW1	0.66766	7.92e-53	postive
PSME3	BZW1	0.595496	1.19e-39	postive
PTN	BZW1	0.528746	4.05e-30	postive
RAC1	BZW1	0.586417	3.18e-38	postive
RBP1	BZW1	0.508294	1.34e-27	postive
RHOA	BZW1	0.623712	2.15e-44	postive
S100A16	BZW1	0.554831	1.37e-33	postive
SEMA4G	BZW1	-0.532056	1.53e-30	negative
SHC2	BZW1	-0.511991	4.82e-28	negative
SLC22A17	BZW1	-0.5532	2.31e-33	negative
TANK	BZW1	0.663483	5.78e-52	postive
TFRC	BZW1	0.513404	3.26e-28	postive
THRA	BZW1	-0.612373	1.98e-42	negative
TMSB10	BZW1	0.593374	2.58e-39	postive
TMSB4X	BZW1	0.627373	4.8e-45	postive
TNFRSF12A	BZW1	0.578019	6.08e-37	postive
TNFRSF19	BZW1	0.552836	2.59e-33	postive
TNFRSF1A	BZW1	0.55037	5.65e-33	postive
ULBP3	BZW1	0.52888	3.9e-30	postive
VIM	BZW1	0.504642	3.62e-27	postive
ZYX	BZW1	0.536883	3.61e-31	postive
BRD8	C12orf65	0.500537	1.09e-26	postive
BIRC5	C18orf21	0.518179	8.52e-29	postive
CDC42	C18orf21	0.541287	9.48e-32	postive
CKLF	C18orf21	0.576796	9.28e-37	postive
MYDGF	C18orf21	0.503509	4.91e-27	postive
PPIA	C18orf21	0.528322	4.59e-30	postive
PPP4C	C18orf21	0.592914	3.06e-39	postive
PSMC6	C18orf21	0.524088	1.57e-29	postive
PSMD14	C18orf21	0.590725	6.77e-39	postive
PSMD8	C18orf21	0.559484	3.06e-34	postive
TMSB10	C18orf21	0.518824	7.09e-29	postive
ADRM1	C1orf35	0.501313	8.86e-27	postive
AGER	C1orf35	0.529434	3.31e-30	postive
HRAS	C1orf35	0.564633	5.65e-35	postive
JUND	C1orf35	0.504014	4.28e-27	postive
NR2F6	C1orf35	0.509077	1.08e-27	postive
OGFR	C1orf35	0.556561	7.87e-34	postive
PSMC5	C1orf35	0.597212	6.3e-40	postive
PSMD4	C1orf35	0.653109	7.03e-50	postive
PSPN	C1orf35	0.52031	4.65e-29	postive
RFXANK	C1orf35	0.504104	4.18e-27	postive
ROBO3	C1orf35	0.543248	5.2e-32	postive
SHC2	C1orf35	0.502276	6.84e-27	postive
SKIV2L	C1orf35	0.511111	6.16e-28	postive
TOR2A	C1orf35	0.512692	3.97e-28	postive
UBXN1	C1orf35	0.562159	1.28e-34	postive
UCN	C1orf35	0.652559	9.02e-50	postive
VEGFB	C1orf35	0.521892	2.96e-29	postive
APOBEC3C	CALD1	0.578152	5.81e-37	postive
APOBEC3F	CALD1	0.571016	6.68e-36	postive
APOBEC3G	CALD1	0.520213	4.78e-29	postive
BCL10	CALD1	0.614108	1e-42	postive
BCL3	CALD1	0.60528	3.05e-41	postive
BMP1	CALD1	0.611415	2.87e-42	postive
CALR	CALD1	0.57413	2.32e-36	postive
CASP3	CALD1	0.52079	4.05e-29	postive
CD40	CALD1	0.50677	2.03e-27	postive
CMTM3	CALD1	0.515671	1.73e-28	postive
CMTM6	CALD1	0.563765	7.52e-35	postive
CXCR4	CALD1	0.500445	1.12e-26	postive
ENG	CALD1	0.575934	1.25e-36	postive
FAM3C	CALD1	0.514789	2.21e-28	postive
FURIN	CALD1	0.548504	1.02e-32	postive
GRN	CALD1	0.510111	8.11e-28	postive
HDAC1	CALD1	0.508333	1.32e-27	postive
HFE	CALD1	0.544629	3.39e-32	postive
HSPA5	CALD1	0.593197	2.76e-39	postive
ICAM1	CALD1	0.53369	9.4e-31	postive
IFNGR2	CALD1	0.565322	4.5e-35	postive
IL10RB	CALD1	0.531393	1.86e-30	postive
IL4R	CALD1	0.514488	2.41e-28	postive
LIMS1	CALD1	0.619007	1.43e-43	postive
LTBP2	CALD1	0.507585	1.62e-27	postive
MALT1	CALD1	0.519798	5.38e-29	postive
MAPT	CALD1	-0.568718	1.45e-35	negative
MDK	CALD1	0.570378	8.29e-36	postive
NFKB1	CALD1	0.571898	4.96e-36	postive
NFKBIZ	CALD1	0.556235	8.74e-34	postive
NOX4	CALD1	0.571482	5.71e-36	postive
NRP1	CALD1	0.687934	3.17e-57	postive
OSMR	CALD1	0.637468	6.91e-47	postive
PDGFRB	CALD1	0.599025	3.21e-40	postive
PDIA3	CALD1	0.629233	2.22e-45	postive
PLAU	CALD1	0.600837	1.63e-40	postive
PLAUR	CALD1	0.601221	1.41e-40	postive
PLXND1	CALD1	0.576049	1.2e-36	postive
PROCR	CALD1	0.538513	2.21e-31	postive
PSMC2	CALD1	0.572932	3.49e-36	postive
PTGER4	CALD1	0.563862	7.29e-35	postive
RAC2	CALD1	0.526634	7.51e-30	postive
RELB	CALD1	0.535622	5.28e-31	postive
S100A11	CALD1	0.56542	4.35e-35	postive
SDC1	CALD1	0.508547	1.25e-27	postive
SDC2	CALD1	0.530687	2.29e-30	postive
SEMA3F	CALD1	0.523165	2.05e-29	postive
SHC1	CALD1	0.668061	6.53e-53	postive
SLC22A17	CALD1	-0.540726	1.13e-31	negative
TGFB1	CALD1	0.562507	1.14e-34	postive
TGFBR2	CALD1	0.504362	3.9e-27	postive
THBS1	CALD1	0.557785	5.3e-34	postive
THRA	CALD1	-0.563303	8.76e-35	negative
TNC	CALD1	0.550789	4.95e-33	postive
TNFAIP3	CALD1	0.517663	9.86e-29	postive
TNFRSF14	CALD1	0.516508	1.37e-28	postive
TNFRSF1A	CALD1	0.532531	1.33e-30	postive
TPM2	CALD1	0.613874	1.1e-42	postive
TRIM5	CALD1	0.515321	1.91e-28	postive
TXLNA	CALD1	0.518532	7.71e-29	postive
ULBP3	CALD1	0.545306	2.75e-32	postive
VEGFC	CALD1	0.54463	3.39e-32	postive
VIM	CALD1	0.54751	1.39e-32	postive
ZYX	CALD1	0.542268	7.02e-32	postive
ACVR1B	CALM3	0.504399	3.86e-27	postive
ADRB1	CALM3	0.623757	2.11e-44	postive
ARRB1	CALM3	0.569349	1.17e-35	postive
CCK	CALM3	0.858487	3.39e-117	postive
CHGA	CALM3	0.678976	3.08e-55	postive
CRHR1	CALM3	0.654043	4.6e-50	postive
FABP3	CALM3	0.612152	2.15e-42	postive
FGF13	CALM3	0.620164	9.02e-44	postive
FGF9	CALM3	0.510441	7.41e-28	postive
GREM2	CALM3	0.678703	3.53e-55	postive
IL34	CALM3	0.531072	2.04e-30	postive
MAP2K1	CALM3	0.713365	2.8e-63	postive
MAPK3	CALM3	0.541295	9.46e-32	postive
OPRL1	CALM3	0.732974	2.03e-68	postive
PAK1	CALM3	0.84338	3.78e-109	postive
PAK3	CALM3	0.626404	7.15e-45	postive
PAK5	CALM3	0.571281	6.11e-36	postive
PPP3CA	CALM3	0.774384	6.2e-81	postive
PPP3CB	CALM3	0.810271	3.67e-94	postive
PPP3R1	CALM3	0.863446	4.8e-120	postive
PRKCB	CALM3	0.828403	5.69e-102	postive
PRKCG	CALM3	0.882481	4.05e-132	postive
PTGDR2	CALM3	0.544579	3.45e-32	postive
PTK2B	CALM3	0.664103	4.31e-52	postive
RBP4	CALM3	0.767698	9.73e-79	postive
SEMA4A	CALM3	0.575803	1.31e-36	postive
SST	CALM3	0.698895	9.34e-60	postive
THRB	CALM3	0.78904	5.05e-86	postive
VIP	CALM3	0.850009	1.43e-112	postive
VIPR1	CALM3	0.792544	2.67e-87	postive
ACTG1	CALR	0.611396	2.89e-42	postive
ACVR2B	CALR	-0.558911	3.68e-34	negative
ADM	CALR	0.505247	3.07e-27	postive
ADRM1	CALR	0.543436	4.91e-32	postive
APOBEC3C	CALR	0.546841	1.71e-32	postive
APOBEC3F	CALR	0.571531	5.61e-36	postive
APOBEC3G	CALR	0.552982	2.47e-33	postive
ARAF	CALR	0.563692	7.71e-35	postive
ARRB1	CALR	-0.508885	1.14e-27	negative
B2M	CALR	0.536092	4.58e-31	postive
BCL10	CALR	0.546838	1.71e-32	postive
BCL3	CALR	0.633257	4.13e-46	postive
BMPR2	CALR	-0.517477	1.04e-28	negative
BRAF	CALR	-0.501789	7.8e-27	negative
CALR	CALR	1	0	postive
CASP3	CALR	0.528817	3.97e-30	postive
CD320	CALR	0.561633	1.52e-34	postive
CDC42	CALR	0.54891	8.95e-33	postive
CDNF	CALR	-0.529654	3.11e-30	negative
CKLF	CALR	0.503519	4.9e-27	postive
CMTM3	CALR	0.626484	6.92e-45	postive
CMTM4	CALR	-0.617739	2.38e-43	negative
CMTM6	CALR	0.517317	1.09e-28	postive
ENG	CALR	0.513342	3.31e-28	postive
FAM3C	CALR	0.556686	7.56e-34	postive
FCGRT	CALR	0.534221	8.02e-31	postive
GDF15	CALR	0.528279	4.65e-30	postive
GNAI1	CALR	-0.537385	3.1e-31	negative
GRN	CALR	0.554219	1.67e-33	postive
HDAC1	CALR	0.515815	1.66e-28	postive
HDGFL3	CALR	-0.501635	8.13e-27	negative
HFE	CALR	0.549858	6.64e-33	postive
HLA-A	CALR	0.62462	1.49e-44	postive
HLA-B	CALR	0.544172	3.91e-32	postive
HSPA5	CALR	0.741367	9.25e-71	postive
IFNGR2	CALR	0.72999	1.31e-67	postive
IL10RB	CALR	0.639159	3.35e-47	postive
IL17RC	CALR	0.508873	1.14e-27	postive
IRF1	CALR	0.513367	3.29e-28	postive
ISG20	CALR	0.530524	2.4e-30	postive
LANCL1	CALR	-0.565556	4.16e-35	negative
LIMS1	CALR	0.533354	1.04e-30	postive
MANF	CALR	0.773238	1.49e-80	postive
MAPK8	CALR	-0.607984	1.08e-41	negative
MAPT	CALR	-0.682867	4.31e-56	negative
MDK	CALR	0.656726	1.35e-50	postive
MICA	CALR	0.510368	7.56e-28	postive
MYDGF	CALR	0.775412	2.81e-81	postive
NAMPT	CALR	0.525146	1.16e-29	postive
NOX4	CALR	0.581237	1.98e-37	postive
NR1D2	CALR	-0.559101	3.46e-34	negative
NR2F6	CALR	0.509764	8.93e-28	postive
NRG3	CALR	-0.573623	2.76e-36	negative
NRP1	CALR	0.634003	3.02e-46	postive
OSMR	CALR	0.618447	1.79e-43	postive
PAK3	CALR	-0.513177	3.47e-28	negative
PAK5	CALR	-0.520383	4.55e-29	negative
PDIA3	CALR	0.758288	9.05e-76	postive
PIK3CB	CALR	-0.539058	1.87e-31	negative
PIK3R1	CALR	-0.50937	9.95e-28	negative
PLSCR1	CALR	0.55393	1.83e-33	postive
PLXNB1	CALR	-0.535068	6.23e-31	negative
PPARA	CALR	-0.541935	7.78e-32	negative
PPIA	CALR	0.630665	1.23e-45	postive
PPP3CB	CALR	-0.526683	7.41e-30	negative
PPP4C	CALR	0.591833	4.53e-39	postive
PRKCA	CALR	-0.525947	9.18e-30	negative
PROCR	CALR	0.514481	2.41e-28	postive
PSMB8	CALR	0.600646	1.75e-40	postive
PSMC1	CALR	0.556038	9.31e-34	postive
PSMC2	CALR	0.608252	9.76e-42	postive
PSMC4	CALR	0.59247	3.59e-39	postive
PSMD14	CALR	0.517775	9.55e-29	postive
PSMD8	CALR	0.614293	9.31e-43	postive
PSME1	CALR	0.504275	3.99e-27	postive
PSME2	CALR	0.564454	5.99e-35	postive
PTPN11	CALR	-0.535656	5.22e-31	negative
RABEP1	CALR	-0.611135	3.2e-42	negative
RAC2	CALR	0.537454	3.04e-31	postive
RELB	CALR	0.584728	5.8e-38	postive
RHOA	CALR	0.515673	1.73e-28	postive
S100A10	CALR	0.52777	5.4e-30	postive
S100A11	CALR	0.666134	1.64e-52	postive
S100A16	CALR	0.612247	2.07e-42	postive
S100A6	CALR	0.545859	2.32e-32	postive
SDC1	CALR	0.501302	8.89e-27	postive
SECTM1	CALR	0.530794	2.22e-30	postive
SEMA3F	CALR	0.512895	3.75e-28	postive
SHC1	CALR	0.576074	1.19e-36	postive
SOCS1	CALR	0.590704	6.82e-39	postive
SOS2	CALR	-0.510528	7.23e-28	negative
TGFB1	CALR	0.50419	4.09e-27	postive
THRA	CALR	-0.677049	8.06e-55	negative
TMSB10	CALR	0.644702	3e-48	postive
TMSB4X	CALR	0.551773	3.63e-33	postive
TNC	CALR	0.514829	2.19e-28	postive
TNFRSF12A	CALR	0.614832	7.53e-43	postive
TNFRSF1A	CALR	0.723	9.48e-66	postive
ULBP3	CALR	0.549641	7.11e-33	postive
UNC93B1	CALR	0.50334	5.14e-27	postive
VIM	CALR	0.676096	1.29e-54	postive
ZYX	CALR	0.657629	8.89e-51	postive
APOBEC3C	CALU	0.51521	1.97e-28	postive
BCL10	CALU	0.541531	8.8e-32	postive
BCL3	CALU	0.508583	1.23e-27	postive
BMP1	CALU	0.518507	7.76e-29	postive
CALR	CALU	0.559797	2.76e-34	postive
CMTM6	CALU	0.523078	2.1e-29	postive
HSPA5	CALU	0.531646	1.73e-30	postive
IFNGR2	CALU	0.554026	1.77e-33	postive
LIMS1	CALU	0.58072	2.38e-37	postive
MDK	CALU	0.522684	2.36e-29	postive
NRP1	CALU	0.59442	1.76e-39	postive
OSMR	CALU	0.563352	8.62e-35	postive
PDIA3	CALU	0.55862	4.05e-34	postive
PLAUR	CALU	0.505021	3.26e-27	postive
PSMC1	CALU	0.508515	1.26e-27	postive
PSMC2	CALU	0.571945	4.88e-36	postive
S100A11	CALU	0.522377	2.57e-29	postive
SDC1	CALU	0.581615	1.74e-37	postive
SHC1	CALU	0.603618	5.73e-41	postive
TGFB1	CALU	0.503372	5.09e-27	postive
THRA	CALU	-0.524699	1.32e-29	negative
ULBP3	CALU	0.521733	3.1e-29	postive
VIM	CALU	0.51759	1.01e-28	postive
AP3B1	CANX	0.581611	1.74e-37	postive
CANX	CANX	1	0	postive
ERAP1	CANX	0.504176	4.1e-27	postive
HSPA4	CANX	0.546241	2.06e-32	postive
HSPA5	CANX	0.530963	2.11e-30	postive
IL6ST	CANX	0.503074	5.52e-27	postive
STAT3	CANX	0.532435	1.37e-30	postive
TRIM5	CANX	0.525356	1.09e-29	postive
ZC3HAV1	CANX	0.52042	4.51e-29	postive
ACVR2B	CAPG	-0.6349	2.06e-46	negative
ADA2	CAPG	0.610008	4.95e-42	postive
ANGPTL6	CAPG	0.605719	2.58e-41	postive
APOBEC3C	CAPG	0.662041	1.14e-51	postive
APOBEC3F	CAPG	0.687323	4.36e-57	postive
APOBEC3G	CAPG	0.705818	2.05e-61	postive
B2M	CAPG	0.600752	1.69e-40	postive
BCL3	CAPG	0.549861	6.64e-33	postive
BMP2	CAPG	-0.532418	1.37e-30	negative
BMPR2	CAPG	-0.541053	1.02e-31	negative
BTK	CAPG	0.686711	5.98e-57	postive
C3	CAPG	0.543601	4.66e-32	postive
C3AR1	CAPG	0.546656	1.81e-32	postive
C5AR1	CAPG	0.532649	1.28e-30	postive
CALR	CAPG	0.523206	2.03e-29	postive
CCL5	CAPG	0.51937	6.07e-29	postive
CCR5	CAPG	0.566774	2.77e-35	postive
CCRL2	CAPG	0.679443	2.43e-55	postive
CD14	CAPG	0.578956	4.39e-37	postive
CD3D	CAPG	0.531521	1.79e-30	postive
CD4	CAPG	0.57146	5.75e-36	postive
CD40	CAPG	0.623168	2.68e-44	postive
CD48	CAPG	0.664204	4.11e-52	postive
CD74	CAPG	0.657372	1e-50	postive
CD86	CAPG	0.64369	4.68e-48	postive
CDC42	CAPG	0.501997	7.37e-27	postive
CKLF	CAPG	0.586357	3.25e-38	postive
CMTM3	CAPG	0.565131	4.79e-35	postive
CMTM6	CAPG	0.536084	4.59e-31	postive
CMTM7	CAPG	0.627551	4.46e-45	postive
CSF3R	CAPG	0.536311	4.29e-31	postive
CTF1	CAPG	0.604322	4.38e-41	postive
CTSB	CAPG	0.574926	1.77e-36	postive
CTSL	CAPG	0.505753	2.67e-27	postive
CTSS	CAPG	0.596736	7.51e-40	postive
CXCL16	CAPG	0.690455	8.5e-58	postive
CXCR4	CAPG	0.564769	5.4e-35	postive
CYBB	CAPG	0.504152	4.13e-27	postive
FAS	CAPG	0.549342	7.81e-33	postive
FCER1G	CAPG	0.735796	3.39e-69	postive
FCGR2B	CAPG	0.540379	1.25e-31	postive
FCGR3A	CAPG	0.620033	9.51e-44	postive
FCGRT	CAPG	0.64653	1.34e-48	postive
FGF12	CAPG	-0.500868	9.98e-27	negative
FGR	CAPG	0.612268	2.06e-42	postive
FPR1	CAPG	0.550314	5.75e-33	postive
GMFG	CAPG	0.627074	5.43e-45	postive
GRN	CAPG	0.708654	4.15e-62	postive
GSK3B	CAPG	-0.548079	1.16e-32	negative
HCK	CAPG	0.609639	5.72e-42	postive
HCST	CAPG	0.67054	1.97e-53	postive
HDGFL3	CAPG	-0.581919	1.56e-37	negative
HFE	CAPG	0.645856	1.81e-48	postive
HLA-DMA	CAPG	0.692279	3.25e-58	postive
HLA-DMB	CAPG	0.653515	5.85e-50	postive
HLA-DPA1	CAPG	0.525698	9.87e-30	postive
HLA-DPB1	CAPG	0.589696	9.82e-39	postive
HLA-DQB1	CAPG	0.582787	1.15e-37	postive
HLA-DRA	CAPG	0.597288	6.13e-40	postive
HLA-DRB1	CAPG	0.598612	3.75e-40	postive
HLA-DRB5	CAPG	0.505211	3.1e-27	postive
HLA-E	CAPG	0.535663	5.21e-31	postive
IFNGR2	CAPG	0.64876	4.97e-49	postive
IKBKE	CAPG	0.526323	8.23e-30	postive
IL10RB	CAPG	0.662455	9.38e-52	postive
IL12RB1	CAPG	0.573755	2.63e-36	postive
IL13RA1	CAPG	0.575404	1.5e-36	postive
IL16	CAPG	0.54433	3.72e-32	postive
IL18	CAPG	0.636607	9.99e-47	postive
IL2RG	CAPG	0.591463	5.18e-39	postive
IRF5	CAPG	0.606171	2.17e-41	postive
ISG20	CAPG	0.539208	1.79e-31	postive
ITGB2	CAPG	0.67986	1.97e-55	postive
LCP2	CAPG	0.631528	8.54e-46	postive
LTBR	CAPG	0.563584	7.99e-35	postive
LYN	CAPG	0.634661	2.28e-46	postive
MAPK8	CAPG	-0.647929	7.2e-49	negative
MAPT	CAPG	-0.692842	2.41e-58	negative
MICA	CAPG	0.502535	6.38e-27	postive
MR1	CAPG	0.583938	7.67e-38	postive
MSR1	CAPG	0.678756	3.44e-55	postive
MYDGF	CAPG	0.517126	1.15e-28	postive
OLR1	CAPG	0.543662	4.58e-32	postive
PIK3R5	CAPG	0.560165	2.45e-34	postive
PLAUR	CAPG	0.534328	7.77e-31	postive
PLSCR1	CAPG	0.618996	1.44e-43	postive
PPARG	CAPG	0.697743	1.75e-59	postive
PRDX1	CAPG	0.504197	4.08e-27	postive
PRKCA	CAPG	-0.549577	7.26e-33	negative
PROCR	CAPG	0.536242	4.38e-31	postive
PSMB8	CAPG	0.519343	6.12e-29	postive
PSMC2	CAPG	0.556147	8.99e-34	postive
PSME2	CAPG	0.510334	7.63e-28	postive
PTAFR	CAPG	0.505609	2.78e-27	postive
PTPN6	CAPG	0.671571	1.2e-53	postive
RABEP1	CAPG	-0.504355	3.91e-27	negative
RAC2	CAPG	0.711662	7.46e-63	postive
RELB	CAPG	0.590737	6.74e-39	postive
RHOA	CAPG	0.516438	1.39e-28	postive
RNASE2	CAPG	0.555586	1.08e-33	postive
S100A10	CAPG	0.606447	1.95e-41	postive
S100A11	CAPG	0.785694	7.95e-85	postive
S100A13	CAPG	0.54513	2.91e-32	postive
S100A16	CAPG	0.513042	3.6e-28	postive
S100A6	CAPG	0.593538	2.43e-39	postive
SEMA4G	CAPG	-0.636049	1.27e-46	negative
SEMA6B	CAPG	-0.510346	7.61e-28	negative
SLC11A1	CAPG	0.51267	4e-28	postive
SOS2	CAPG	-0.57198	4.82e-36	negative
SPP1	CAPG	0.62676	6.18e-45	postive
SYK	CAPG	0.514127	2.66e-28	postive
TAPBPL	CAPG	0.512139	4.63e-28	postive
TGFB1	CAPG	0.623382	2.46e-44	postive
THRA	CAPG	-0.521837	3e-29	negative
TLR1	CAPG	0.556333	8.47e-34	postive
TLR2	CAPG	0.559324	3.22e-34	postive
TLR3	CAPG	0.539375	1.7e-31	postive
TMSB10	CAPG	0.572657	3.83e-36	postive
TMSB4X	CAPG	0.65404	4.6e-50	postive
TNFRSF14	CAPG	0.698272	1.31e-59	postive
TNFRSF1A	CAPG	0.677161	7.62e-55	postive
TNFSF12	CAPG	0.666553	1.35e-52	postive
TNFSF13	CAPG	0.541282	9.5e-32	postive
TNFSF8	CAPG	0.607131	1.5e-41	postive
TYMP	CAPG	0.670612	1.91e-53	postive
TYROBP	CAPG	0.734339	8.56e-69	postive
UNC93B1	CAPG	0.744993	8.43e-72	postive
VAV1	CAPG	0.592311	3.81e-39	postive
VIM	CAPG	0.577533	7.2e-37	postive
LTBP3	CAPN2	0.518884	6.97e-29	postive
PSME3	CAPRIN1	0.549121	8.37e-33	postive
ACVR2B	CASC3	0.674655	2.64e-54	postive
APOBEC3C	CASC3	-0.540561	1.18e-31	negative
APOBEC3F	CASC3	-0.577109	8.33e-37	negative
APOBEC3G	CASC3	-0.563351	8.62e-35	negative
BMP2	CASC3	0.579053	4.25e-37	postive
BRD8	CASC3	0.537248	3.23e-31	postive
CD40	CASC3	-0.507558	1.64e-27	negative
CHGB	CASC3	0.512852	3.8e-28	postive
FCER1G	CASC3	-0.503965	4.34e-27	negative
FCGRT	CASC3	-0.516534	1.36e-28	negative
GMFG	CASC3	-0.502757	6.01e-27	negative
GSK3B	CASC3	0.530312	2.56e-30	postive
HFE	CASC3	-0.571409	5.85e-36	negative
IFNGR2	CASC3	-0.57827	5.58e-37	negative
IL13RA1	CASC3	-0.51544	1.84e-28	negative
LTBR	CASC3	-0.511878	4.98e-28	negative
MAPK8	CASC3	0.570214	8.76e-36	postive
MAPT	CASC3	0.662026	1.15e-51	postive
MICA	CASC3	-0.503955	4.35e-27	negative
NR2C2	CASC3	0.517696	9.76e-29	postive
OSMR	CASC3	-0.502461	6.51e-27	negative
PSMC2	CASC3	-0.521462	3.35e-29	negative
RELB	CASC3	-0.501747	7.89e-27	negative
RXRB	CASC3	0.572111	4.61e-36	postive
[truncated: 19,731 more rows]

## Sheet: 04.prognosis-related RBPs
id	HR	HR.95L	HR.95H	pvalue
AAR2	2.10546	1.28935	3.43813	0.00292331
AATF	0.52589	0.389526	0.709992	2.71186e-05
ABT1	2.07093	1.41916	3.02204	0.000159749
ACO2	0.575008	0.487295	0.67851	5.64539e-11
ADARB1	0.613181	0.452079	0.831691	0.0016607
ADARB2	0.494776	0.406238	0.602611	2.65771e-12
ADAT1	1.66961	1.1441	2.43651	0.00785993
ADSL	1.59964	1.22214	2.09374	0.000624771
ADSS	1.61373	1.27685	2.03948	6.18229e-05
AEN	1.84363	1.52587	2.22755	2.32534e-10
AFF2	0.261915	0.181586	0.377779	7.56882e-13
AHCY	2.05829	1.65008	2.56749	1.54897e-10
AHNAK2	1.48893	1.23696	1.79223	2.57605e-05
AIMP2	1.62671	1.13699	2.32734	0.00775558
AKAP13	0.663394	0.5004	0.879479	0.00433528
ALDH18A1	0.548053	0.40036	0.750229	0.000174236
ALDOA	1.89534	1.39986	2.56621	3.54079e-05
ALKBH8	0.457988	0.301498	0.695701	0.000251284
ALYREF	1.48161	1.17325	1.87101	0.000960014
AMPD2	0.630443	0.453671	0.876095	0.0059982
ANG	2.34991	1.97702	2.79313	3.27944e-22
ANKFY1	0.639423	0.502176	0.81418	0.000286114
ANXA1	1.52657	1.4015	1.6628	3.02466e-22
ANXA2	1.71384	1.54846	1.89688	2.3328e-25
ANXA5	1.99162	1.72829	2.29507	1.70272e-21
AP3B1	1.928	1.23477	3.01041	0.00388242
APEX2	3.49908	2.46038	4.97627	3.1599e-12
APOBEC3B	2.349	1.93366	2.85357	7.82365e-18
APOBEC3C	2.17809	1.88778	2.51304	1.46898e-26
APOBEC3D	3.68193	2.82287	4.8024	6.86805e-22
AQR	0.593482	0.401769	0.876675	0.0087621
ARF3	0.576334	0.435012	0.763568	0.000123349
ARF4	2.70462	2.15135	3.40016	1.58499e-17
ARL11	2.60304	2.00235	3.38393	8.87461e-13
ARL5A	2.91237	1.82163	4.65622	8.00664e-06
ARL6	1.69028	1.1658	2.45071	0.0056165
ARPP21	0.467081	0.394698	0.552738	7.92933e-19
ASCC1	0.252383	0.18261	0.348816	7.49023e-17
ASIC2	0.597178	0.440141	0.810245	0.000927626
ASPM	1.67808	1.42742	1.97276	3.58268e-10
ASS1	1.33427	1.18468	1.50275	2.00071e-06
ATAD2	1.39445	1.14473	1.69864	0.000958369
ATF7IP	0.444621	0.344409	0.573992	4.96288e-10
ATL3	2.70115	1.99476	3.6577	1.32422e-10
ATP1A1	2.03744	1.63475	2.53933	2.38149e-10
ATP6V1A	0.555868	0.417124	0.740761	6.11867e-05
BCCIP	0.21042	0.149731	0.295709	2.76096e-19
BCLAF3	0.536831	0.335122	0.859948	0.00966517
BLM	1.52111	1.30714	1.7701	5.86667e-08
BRAT1	1.73461	1.28689	2.33809	0.000299449
BRCA1	2.52655	1.96122	3.25482	7.38242e-13
BRIX1	2.08042	1.39248	3.10822	0.000348517
BTN3A3	1.49496	1.23091	1.81565	5.01137e-05
BUD23	2.55864	1.83895	3.55999	2.47391e-08
BZW1	4.63058	3.43342	6.24515	9.89853e-24
C12orf65	0.369788	0.219855	0.62197	0.000176879
C18orf21	1.69267	1.21527	2.35761	0.00185031
CALD1	2.08793	1.77658	2.45386	4.07156e-19
CALR	3.25523	2.53869	4.17402	1.34439e-20
CALU	2.00349	1.75621	2.28558	4.68978e-25
CANX	2.79246	1.97696	3.94435	5.61348e-09
CAPG	1.93019	1.69552	2.19734	2.70269e-23
CASC3	0.367761	0.265767	0.508897	1.57892e-09
CBX3	2.26577	1.78445	2.87692	1.90759e-11
CCAR1	0.382981	0.266458	0.550458	2.15463e-07
CCDC59	1.92621	1.32818	2.79351	0.00054769
CCT3	0.55508	0.393454	0.7831	0.000801179
CD58	2.12481	1.86155	2.42529	5.84815e-29
CDC40	0.525348	0.364406	0.757369	0.000562628
CDC42BPA	0.622062	0.47447	0.815567	0.000591923
CDC42BPB	0.494402	0.410327	0.595705	1.29308e-13
CDK4	1.25129	1.15138	1.35988	1.29134e-07
CEBPZ	0.552255	0.373747	0.81602	0.0028767
CELF2	0.450413	0.364163	0.55709	1.9189e-13
CELF3	0.687686	0.614664	0.769383	6.26444e-11
CELF4	0.698275	0.607032	0.803231	4.98683e-07
CELF5	0.64482	0.567866	0.732201	1.31336e-11
CENPE	2.09296	1.69828	2.57935	4.27976e-12
CENPF	1.38623	1.22788	1.56501	1.31325e-07
CEP55	1.98723	1.69	2.33673	9.73783e-17
CHD3	0.540032	0.458171	0.636519	2.041e-13
CHD4	0.486593	0.384364	0.616011	2.1454e-09
CHD5	0.612518	0.514454	0.729276	3.66165e-08
CHD7	0.526109	0.443009	0.624796	2.44287e-13
CHD9	0.447965	0.339784	0.590589	1.23889e-08
CIT	0.647336	0.535687	0.782255	6.71977e-06
CKAP2	1.41266	1.17444	1.69921	0.00024606
CKAP4	2.5805	2.04424	3.25744	1.51524e-15
CLASP2	0.41555	0.343165	0.503202	2.40796e-19
CLIC1	1.93945	1.71987	2.18707	3.2651e-27
CLP1	4.52219	2.89374	7.06704	3.47907e-11
CMTR2	2.31769	1.49843	3.58487	0.000158527
CNN2	1.21823	1.06537	1.39301	0.00390628
CNN3	1.96659	1.64532	2.35059	1.07313e-13
CNOT11	3.28716	2.33353	4.6305	9.95494e-12
CNOT6	0.527965	0.37653	0.740304	0.000212696
COPB1	4.88562	3.39543	7.02982	1.29002e-17
COPB2	3.3697	2.20126	5.15836	2.24552e-08
COQ5	1.56908	1.1138	2.21048	0.009986
CORO1B	2.08337	1.30523	3.32543	0.0020947
CORO1C	0.711454	0.560209	0.903531	0.00524031
CPEB3	0.283016	0.216739	0.36956	1.82029e-20
CPEB4	0.583934	0.468302	0.728118	1.77001e-06
CPSF2	0.496324	0.315367	0.781113	0.00246476
CPSF3	1.70696	1.21371	2.40065	0.00211831
CPSF4	3.04168	2.3021	4.01885	5.0282e-15
CRCP	2.66472	2.01653	3.52126	5.49958e-12
CSRP1	1.50718	1.29863	1.74923	6.71146e-08
CSTB	3.19552	2.39777	4.25869	2.22876e-15
CSTF1	2.51751	1.55006	4.08877	0.00019052
CTIF	0.414747	0.349632	0.49199	5.53354e-24
CTNNA1	3.82994	2.74548	5.34276	2.65246e-15
CWF19L2	0.322308	0.220688	0.470721	4.65494e-09
CYFIP1	1.84093	1.44142	2.35116	1.0122e-06
CYFIP2	0.521635	0.435394	0.624958	1.68773e-12
DALRD3	2.56554	1.92764	3.41455	1.05027e-10
DAP	3.20937	2.4983	4.12282	7.17782e-20
DAP3	3.39884	2.24143	5.15389	8.4242e-09
DARS2	2.58254	1.86225	3.58142	1.29302e-08
DBR1	3.24821	1.90678	5.53334	1.4596e-05
DCAF13	1.96047	1.34716	2.85299	0.000436896
DCPS	2.27919	1.64086	3.16584	8.93484e-07
DCTN1	0.482766	0.384756	0.605741	3.17895e-10
DDX19B	2.113	1.22611	3.64141	0.00705905
DDX20	2.6256	1.87108	3.68439	2.34444e-08
DDX21	0.479638	0.36198	0.63554	3.11107e-07
DDX24	0.423946	0.313176	0.573895	2.79396e-08
DDX25	0.457849	0.365565	0.573429	1.03001e-11
DDX39A	1.85454	1.48442	2.31694	5.38946e-08
DDX56	2.26769	1.70877	3.00941	1.42149e-08
DDX58	1.50989	1.25409	1.81788	1.35823e-05
DDX60	1.6334	1.34762	1.97977	5.7227e-07
DDX60L	1.94807	1.58107	2.40028	3.81937e-10
DEK	2.04907	1.55144	2.70632	4.32593e-07
DHX15	2.33484	1.63739	3.32937	2.81836e-06
DHX40	2.11352	1.50708	2.96399	1.44317e-05
DHX8	2.13519	1.362	3.34732	0.000943678
DIAPH1	2.27032	1.71432	3.00664	1.05955e-08
DKC1	1.96089	1.41753	2.71252	4.75213e-05
DNAAF5	3.32321	2.55375	4.32451	3.99085e-19
DNAJC27	0.326357	0.202857	0.525046	3.91924e-06
DNASE1	0.515221	0.352897	0.752212	0.000593187
DNM1L	0.455939	0.305156	0.681227	0.000126256
DNMBP	0.429888	0.323636	0.571023	5.6014e-09
DOCK7	1.40947	1.13323	1.75306	0.00204435
DTYMK	1.9651	1.66301	2.32206	2.14636e-15
DUS2	0.425008	0.252072	0.716587	0.00132594
DUS4L	3.41024	2.05793	5.65119	1.93105e-06
DUSP11	2.42834	1.68549	3.49859	1.91575e-06
DYNC1H1	0.427032	0.354367	0.514596	3.85395e-19
ECPAS	0.634664	0.468331	0.860071	0.003367
EDC3	0.423682	0.278192	0.64526	6.30389e-05
EEF1D	0.473276	0.351466	0.637302	8.33606e-07
EEF2	0.407464	0.325766	0.509651	3.73271e-15
EFTUD2	1.67976	1.23981	2.27583	0.000816056
EHD3	0.558374	0.466909	0.667755	1.72098e-10
EHD4	2.24103	1.83068	2.74338	5.29113e-15
EIF2A	0.526593	0.368602	0.7523	0.00042536
EIF2B1	2.89798	1.79954	4.6669	1.20475e-05
EIF2S2	3.23833	2.14516	4.88856	2.24296e-08
EIF3B	1.57368	1.13227	2.18718	0.00694305
EIF3H	0.39336	0.281369	0.549924	4.81738e-08
EIF3L	0.554729	0.472075	0.651855	8.15976e-13
EIF4A2	0.428113	0.317543	0.577184	2.6167e-08
EIF4A3	2.82376	1.89483	4.20811	3.39785e-07
EIF4B	0.42222	0.320858	0.555603	7.47056e-10
EIF4EBP1	1.51455	1.29847	1.76658	1.25321e-07
EIF4EBP2	0.266234	0.19485	0.363769	9.60432e-17
EIF4G2	3.09284	2.07162	4.61746	3.352e-08
EIF5A	2.34748	1.76307	3.12562	5.15475e-09
EIF5AL1	1.79657	1.41536	2.28046	1.4739e-06
EIF6	2.14829	1.60676	2.87231	2.46896e-07
ELAC1	2.62971	1.62604	4.2529	8.07951e-05
ELAVL2	0.573307	0.484798	0.677974	7.89849e-11
ELAVL3	0.638818	0.564229	0.723269	1.50383e-12
ELAVL4	0.656983	0.574618	0.751154	7.90905e-10
EML4	2.31224	1.72053	3.10744	2.72788e-08
ENAH	0.394168	0.303185	0.512454	3.5778e-12
ENDOU	0.587042	0.416881	0.826659	0.00228863
ERI1	4.33953	3.29529	5.71467	1.45529e-25
ESF1	0.62551	0.486703	0.803905	0.000247365
ESPL1	1.88687	1.55985	2.28244	6.22166e-11
ETHE1	2.59359	2.05726	3.26974	7.44771e-16
EXOSC7	0.551484	0.360128	0.844519	0.00619692
FAM120A	2.12392	1.40945	3.20057	0.000317825
FAM120C	0.418448	0.302714	0.57843	1.33501e-07
FANCD2	1.98612	1.63335	2.41507	6.08694e-12
FANCI	1.68449	1.45052	1.95619	8.21943e-12
FARS2	3.43117	2.18695	5.38327	8.0862e-08
FASN	0.550024	0.473946	0.638314	3.53502e-15
FASTKD3	2.72407	1.9068	3.89163	3.66325e-08
FBLL1	0.630922	0.562181	0.708069	5.06875e-15
FBXO22	4.07669	2.76799	6.00414	1.12677e-12
FCHO1	0.639783	0.4827	0.847984	0.00188932
FERMT2	1.56506	1.19415	2.05119	0.00117183
FHL2	1.61937	1.3301	1.97155	1.57775e-06
FLNA	1.63008	1.42001	1.87122	3.87836e-12
FLYWCH2	0.541982	0.365247	0.804235	0.00235072
FN1	1.50704	1.36997	1.65784	3.46761e-17
FNDC3B	3.12977	2.51918	3.88836	6.76394e-25
FTSJ1	2.43976	1.56281	3.80878	8.68489e-05
FTSJ3	0.559777	0.411913	0.760718	0.00020925
FUBP3	0.463834	0.357857	0.601194	6.44737e-09
FXR2	0.348704	0.264943	0.458948	5.62404e-14
G3BP1	2.10783	1.2391	3.58562	0.00594377
GALNT2	2.44136	1.94055	3.0714	2.53918e-14
GANAB	4.14879	2.90125	5.93279	6.35923e-15
GART	1.73087	1.20493	2.48638	0.00299041
GBE1	2.3889	1.9365	2.94699	4.30871e-16
GCC2	0.520406	0.363051	0.745963	0.000377557
GCN1	0.543808	0.400087	0.739158	0.000100203
GEMIN6	1.78802	1.23891	2.58052	0.00190647
GIMAP2	2.32277	1.93344	2.79048	2.18246e-19
GIMAP4	1.47127	1.24197	1.7429	7.93978e-06
GIMAP6	1.57617	1.26565	1.96287	4.815e-05
GNAI2	2.26243	1.55884	3.28358	1.74007e-05
GNAI3	3.9331	2.69928	5.73091	1.00407e-12
GNL2	2.10068	1.54547	2.85534	2.13876e-06
GOT1	0.673708	0.534838	0.848634	0.00079784
GPANK1	0.27883	0.187677	0.414255	2.56413e-10
GPI	2.12103	1.69468	2.65466	5.13447e-11
GPN1	3.07954	2.37459	3.99379	2.24576e-17
GTF2B	2.42941	1.77568	3.32381	2.85559e-08
GTPBP2	1.79527	1.37121	2.35048	2.07979e-05
GTSE1	1.65936	1.43084	1.92438	2.09977e-11
H1F0	0.506244	0.423955	0.604505	5.42171e-14
H2AFY	3.28756	2.20354	4.90486	5.52831e-09
H3F3C	3.06232	2.39934	3.90851	2.45877e-19
HABP4	0.345853	0.262327	0.455972	5.1389e-14
HADHA	0.285613	0.186772	0.436761	7.36416e-09
HAGH	0.346983	0.227958	0.528158	7.88908e-07
HAT1	4.49593	3.12841	6.46122	4.50804e-16
HBP1	2.63302	1.86202	3.72324	4.33259e-08
HDGFL3	0.261753	0.178795	0.383203	5.49422e-12
HELLS	1.75529	1.34313	2.29392	3.7817e-05
HELZ2	1.43279	1.20794	1.69948	3.64157e-05
HERC1	0.398318	0.316983	0.500521	2.80932e-15
HERC2	0.457284	0.364473	0.573727	1.37715e-11
HERC5	1.65211	1.43695	1.89948	1.76032e-12
HEXIM2	0.231792	0.141627	0.379357	6.01891e-09
HFM1	0.282517	0.184296	0.433085	6.65979e-09
HINT3	0.28024	0.212039	0.370376	3.8711e-19
HIST1H4I	1.82183	1.52466	2.17693	4.05194e-11
HK2	1.65789	1.43187	1.91958	1.37442e-11
HMGB1	1.69284	1.16675	2.45613	0.00556921
HMGB2	1.83149	1.54967	2.16456	1.26364e-12
HMGN5	0.422627	0.356174	0.501479	5.75751e-23
HNRNPA1	0.650872	0.485237	0.873046	0.00415609
HNRNPA1L2	0.478854	0.32519	0.70513	0.000191912
HNRNPA1P48	1.90451	1.5493	2.34115	9.53943e-10
HNRNPAB	1.89156	1.42559	2.50984	9.99529e-06
HNRNPF	1.97127	1.43146	2.71464	3.22372e-05
HNRNPH1	1.73218	1.29033	2.32532	0.000255666
HNRNPL	3.09725	2.00288	4.78957	3.71728e-07
HSD17B10	2.06524	1.61015	2.64897	1.12678e-08
HSP90AB1	0.500475	0.356977	0.701658	5.93992e-05
HSP90B1	2.71524	2.08725	3.53218	9.84271e-14
HSPB1	1.95784	1.70065	2.25392	8.75348e-21
HTT	0.492427	0.380107	0.637937	8.18315e-08
IFI16	1.73765	1.4601	2.06796	4.88347e-10
IFIH1	1.64565	1.41453	1.91453	1.10861e-10
IGF2BP3	2.00392	1.70202	2.35938	7.2292e-17
IGHMBP2	0.390137	0.268242	0.567426	8.45096e-07
ILF2	1.53583	1.13812	2.07254	0.00501549
ILF3	0.59875	0.436317	0.821654	0.00149061
IMPDH2	0.524693	0.41118	0.669543	2.15775e-07
INPP5A	0.334144	0.253584	0.440295	6.81372e-15
INPP5J	0.436888	0.31097	0.613794	1.8078e-06
INTS9	2.81114	1.81865	4.34526	3.29171e-06
IPO7	0.636808	0.477385	0.84947	0.00214298
ISY1	0.265157	0.160832	0.437156	1.9526e-07
ITGB1	2.05484	1.69875	2.48558	1.1958e-13
ITPRID2	2.30822	1.83392	2.90518	1.02202e-12
JPT2	2.53313	2.01928	3.17776	9.35146e-16
KDM3B	0.412094	0.317458	0.53494	2.74597e-11
KHDRBS2	0.303323	0.223161	0.41228	2.56617e-14
KHSRP	0.61544	0.460173	0.823096	0.00106639
KIF11	1.36623	1.16404	1.60353	0.000134051
KIF14	1.76964	1.45192	2.15688	1.57472e-08
KIF15	1.61216	1.36498	1.90411	1.86602e-08
KIF1B	0.567117	0.476956	0.674321	1.35734e-10
KIF20A	1.95501	1.69239	2.25838	8.3379e-20
KIF23	1.92283	1.64022	2.25413	7.57007e-16
KIF2C	1.66216	1.46788	1.88216	1.12794e-15
KIF4A	1.76741	1.54365	2.02361	1.63801e-16
KIFC1	1.4311	1.267	1.61646	8.00285e-09
KNTC1	1.9293	1.54882	2.40325	4.53235e-09
KRI1	0.599943	0.43636	0.824849	0.00165864
L1CAM	0.802446	0.730126	0.881929	4.94039e-06
LARP1	0.627388	0.492461	0.799285	0.000161089
LARP4	2.19336	1.55298	3.0978	8.24403e-06
LARS	0.492214	0.323247	0.749505	0.00095335
LIMD1	1.49234	1.20113	1.85417	0.00030087
LIMS1	2.93368	2.26748	3.79562	2.63167e-16
LLPH	2.14395	1.27489	3.60543	0.0040312
LMAN1	2.37716	1.82824	3.09089	1.01942e-10
LMAN2	3.02205	2.36123	3.86781	1.57181e-18
LMNB1	1.63354	1.41318	1.88825	3.18391e-11
LMNB2	1.44223	1.18327	1.75786	0.000287267
LRRC59	3.77698	2.69983	5.28387	8.62608e-15
LSG1	2.33401	1.52556	3.5709	9.35653e-05
LSM1	2.61176	1.7467	3.90524	2.90843e-06
LSM10	2.1326	1.75843	2.5864	1.42514e-14
LSM11	0.334698	0.2179	0.5141	5.78305e-07
LSM12	5.9632	4.04096	8.79983	2.38737e-19
LSM14A	1.67366	1.22677	2.28333	0.00115582
LSM2	1.386	1.12661	1.7051	0.0020178
LSM3	1.77085	1.28862	2.43354	0.000426095
LSM5	1.86237	1.54892	2.23927	3.75816e-11
LSM6	1.97461	1.35268	2.88249	0.000423225
LSM7	1.36555	1.13443	1.64375	0.000990784
LSM8	2.09932	1.41364	3.11757	0.000237196
MAGOHB	1.89804	1.41436	2.54713	1.95532e-05
MALSU1	2.89825	2.29914	3.65349	2.13264e-19
MANF	2.41081	1.94333	2.99073	1.23355e-15
MAP3K20	2.59612	2.05747	3.27579	8.91467e-16
MAPK1	0.519374	0.390605	0.690593	6.58956e-06
MAPK10	0.444392	0.363122	0.543851	3.52809e-15
MAPK9	0.308923	0.206651	0.46181	1.02677e-08
MARCKS	0.440079	0.349538	0.554073	2.86581e-12
MBD2	4.21174	2.96067	5.99146	1.28786e-15
MBLAC2	0.524306	0.346748	0.792786	0.0022086
MCM2	1.76292	1.53195	2.02872	2.51184e-15
MCM3	2.08754	1.67183	2.60662	8.25571e-11
MCM4	1.85488	1.54814	2.22241	2.10373e-11
MCM5	2.2193	1.77181	2.7798	3.96303e-12
MCM6	2.1152	1.7539	2.55092	4.54059e-15
MCM7	1.36082	1.11408	1.6622	0.00254161
MCMBP	0.426458	0.26826	0.67795	0.000314156
MDM2	1.39148	1.26127	1.53512	4.37515e-11
MED12	0.67301	0.518206	0.874059	0.00298493
METTL16	0.384648	0.262973	0.56262	8.46563e-07
METTL2B	1.8263	1.2674	2.63166	0.00123232
METTL4	2.67629	1.84112	3.8903	2.49379e-07
METTL7B	1.45087	1.34897	1.56047	1.29128e-23
MEX3A	0.719632	0.616986	0.839355	2.78607e-05
MKI67	1.30245	1.1439	1.48297	6.60395e-05
MLEC	1.92313	1.40875	2.62534	3.82303e-05
MOGS	2.7813	1.88731	4.09877	2.33688e-07
MOV10	2.10613	1.6979	2.61252	1.23898e-11
MPRIP	0.458227	0.372052	0.56436	2.10545e-13
MRM2	4.43258	3.14987	6.23764	1.31144e-17
MRPL11	1.62383	1.29936	2.02932	2.02216e-05
MRPL13	2.24998	1.78361	2.8383	7.78639e-12
MRPL15	2.35539	1.82068	3.04714	6.98656e-11
MRPL23	1.66441	1.33054	2.08207	8.19453e-06
MRPL27	1.50675	1.15751	1.96138	0.00231016
MRPL3	2.23475	1.43874	3.47116	0.000344864
MRPL36	2.9049	2.28898	3.68656	1.76865e-18
MRPL39	3.05095	2.21694	4.19871	7.57085e-12
MRPL47	2.31562	1.77733	3.01692	4.95267e-10
MRPL49	2.09627	1.59697	2.75169	9.69316e-08
MRPL53	1.93228	1.34406	2.77794	0.000375854
MRPL58	1.7587	1.36305	2.26919	1.41219e-05
MRPS31	0.386044	0.258045	0.577535	3.63676e-06
MRPS33	1.82639	1.32587	2.51586	0.000227717
MRPS6	2.39922	1.85899	3.09644	1.77348e-11
MRPS7	1.70511	1.29855	2.23898	0.000123153
MSH6	1.9268	1.39464	2.66202	6.97962e-05
MSI2	0.674106	0.512993	0.885818	0.00465456
MTERF1	1.59488	1.32607	1.91818	7.16792e-07
MTERF3	3.0543	2.21167	4.21797	1.20684e-11
MTHFSD	0.421485	0.260774	0.681241	0.000420533
MYCBP2	0.455777	0.365431	0.568459	3.15e-12
MYH7B	0.283663	0.189407	0.424826	9.70179e-10
MYL6	1.76391	1.50184	2.07171	4.65411e-12
MYO18A	0.56642	0.479639	0.668903	2.09724e-11
MYO5A	0.603711	0.501879	0.726204	8.59248e-08
MYOF	1.70831	1.46498	1.99207	8.47798e-12
NABP2	1.77581	1.25269	2.51739	0.00125817
NAP1L1	0.314052	0.227074	0.434347	2.55792e-12
NCAPD2	1.49159	1.22586	1.81492	6.48925e-05
NCAPG	1.70145	1.4793	1.95694	9.65438e-14
NCAPG2	1.9252	1.58077	2.34468	7.36427e-11
NCAPH	1.62767	1.42194	1.86317	1.59513e-12
NEIL3	2.48606	2.01224	3.07146	3.13848e-17
NGRN	0.470627	0.349701	0.63337	6.56012e-07
NIP7	2.82681	2.07544	3.85021	4.34739e-11
NKIRAS1	0.252031	0.178086	0.35668	7.36327e-15
NKIRAS2	1.92225	1.38278	2.67219	0.000100918
NKRF	0.232655	0.140291	0.385828	1.60361e-08
NME1	1.52924	1.29507	1.80575	5.46882e-07
NOB1	0.442589	0.300094	0.652747	3.92751e-05
NOC3L	0.439253	0.272658	0.707639	0.00072132
NOCT	2.81233	2.04595	3.8658	1.89043e-10
NOL10	2.2753	1.49081	3.47261	0.000138354
NOL11	2.1918	1.53432	3.13102	1.61353e-05
NOM1	2.00184	1.38279	2.89804	0.000236031
NOP10	1.97041	1.64825	2.35554	9.62129e-14
NOP14	1.87238	1.21655	2.88176	0.00435855
NOP16	2.23519	1.59294	3.1364	3.25923e-06
NOP53	0.500741	0.396921	0.631717	5.39756e-09
NOVA1	0.640208	0.52869	0.775249	4.9494e-06
NOVA2	0.498242	0.390251	0.636115	2.2791e-08
NPM1	1.57401	1.20751	2.05175	0.000795763
NPM2	0.628303	0.51344	0.768862	6.4316e-06
NRAS	2.59931	1.96374	3.44058	2.43605e-11
NUP160	2.42336	1.7144	3.4255	5.36625e-07
NUP205	2.25281	1.71733	2.95525	4.48713e-09
NUP35	2.14881	1.48776	3.10359	4.54489e-05
NUP88	1.99047	1.31429	3.01454	0.0011522
NUP98	1.96573	1.28931	2.99703	0.00168461
NUSAP1	1.53198	1.36746	1.7163	1.85245e-13
NXT1	1.95068	1.65696	2.29647	1.01657e-15
NXT2	1.51851	1.206	1.91199	0.000380483
OAS1	1.47505	1.33573	1.62891	1.6116e-14
OAS3	1.49487	1.33811	1.66999	1.13591e-12
OAT	0.329869	0.252295	0.431295	5.14859e-16
ODF2	1.82704	1.38624	2.40799	1.88246e-05
OTUB1	0.538653	0.348144	0.833412	0.00546478
P3H1	2.1479	1.82793	2.52389	1.55918e-20
P4HA1	1.69576	1.34464	2.13857	8.13491e-06
P4HB	3.01954	2.42308	3.76281	7.38753e-23
PABPC1	0.622845	0.498078	0.778866	3.30752e-05
PABPC1L	1.59766	1.39163	1.83418	2.89874e-11
PABPC4	1.86733	1.36675	2.55124	8.77502e-05
PAIP1	4.34187	2.91464	6.46799	5.17783e-13
PAIP2B	0.571841	0.480749	0.680193	2.73546e-10
PAK1IP1	1.80896	1.25578	2.60583	0.0014578
PALLD	2.35538	1.88799	2.93848	3.16757e-14
PARD3	0.383812	0.302511	0.486964	3.15022e-15
PARP10	1.65007	1.39591	1.9505	4.40261e-09
PARP12	1.98053	1.69732	2.311	3.97452e-18
PARP14	1.50916	1.28574	1.77142	4.79294e-07
PARP4	2.07327	1.51914	2.82954	4.32144e-06
PARS2	2.21287	1.55401	3.15108	1.06045e-05
PATZ1	0.300659	0.237487	0.380637	1.75e-23
PCF11	0.463056	0.337528	0.635267	1.82133e-06
PCNA	2.13683	1.81075	2.52162	2.51609e-19
PCNT	0.468888	0.356851	0.616101	5.42904e-08
PDAP1	2.69353	1.88161	3.8558	6.17213e-08
PDIA3	3.16237	2.46262	4.06095	1.83436e-19
PDIA4	2.53372	2.12696	3.01827	2.17422e-25
PDIA6	2.85037	2.28572	3.5545	1.41442e-20
PDLIM5	0.65358	0.555434	0.769068	3.01028e-07
PDLIM7	1.78313	1.51821	2.09429	1.81727e-12
PES1	0.349515	0.250686	0.487305	5.66766e-10
PFN1	2.92615	2.27064	3.77089	1.06537e-16
PGD	2.31212	1.70343	3.13833	7.57781e-08
PHF5A	1.90985	1.49975	2.4321	1.55268e-07
PHF6	0.480292	0.347432	0.663958	9.0503e-06
PI4KA	0.651696	0.517401	0.820848	0.000276122
PIH1D2	1.90369	1.5053	2.40752	7.70416e-08
PITRM1	0.304902	0.226672	0.410132	4.09958e-15
PKN2	1.84804	1.3477	2.53413	0.00013764
PLCB3	0.531259	0.408418	0.691047	2.42434e-06
PLIN3	1.9216	1.55248	2.37849	1.95375e-09
PLOD1	2.3819	1.98699	2.8553	6.37569e-21
PLOD2	1.98674	1.70502	2.31501	1.38234e-18
PLOD3	2.64748	2.18239	3.21168	5.20368e-23
PML	2.20028	1.62321	2.9825	3.74987e-07
PNN	0.541641	0.435401	0.673804	3.70941e-08
PNO1	2.9005	2.25008	3.73895	2.04087e-16
POLD1	1.79009	1.46264	2.19083	1.6133e-08
POLD2	1.94137	1.4532	2.59352	7.14464e-06
POLDIP3	0.342272	0.25642	0.456867	3.42499e-13
POLE	1.41463	1.0877	1.83982	0.00968288
POLR2F	0.262599	0.185809	0.371125	3.55584e-14
POLR2G	1.92543	1.53849	2.40969	1.04301e-08
POLR2H	1.80993	1.43144	2.2885	7.17934e-07
POLR2J	2.09721	1.67681	2.62301	8.67402e-11
POLR3A	0.233398	0.164877	0.330397	2.29841e-16
POLR3GL	0.329428	0.218805	0.495979	1.04442e-07
POP5	1.90845	1.4545	2.50406	3.10964e-06
PPIB	2.61324	2.04466	3.33992	1.67492e-14
PPM1G	1.92898	1.30011	2.86204	0.00109964
PPP1CA	2.56814	2.04595	3.22363	4.221e-16
PPP1CB	2.62638	2.07135	3.33012	1.56275e-15
PPP1CC	2.37525	1.5584	3.62025	5.73941e-05
PPP1R18	1.8834	1.43775	2.46719	4.31582e-06
PPP6R1	1.75039	1.21681	2.51795	0.00254663
PPP6R3	0.307773	0.195432	0.484692	3.66532e-07
PRC1	1.61679	1.40371	1.86222	2.68373e-11
PRIM2	3.04323	2.2012	4.20736	1.64966e-11
PRKAR2A	1.92448	1.36615	2.71098	0.000180711
PRPF19	0.331633	0.214913	0.511744	6.13773e-07
PRPF4	2.34757	1.64228	3.35575	2.85069e-06
PRRC2B	0.701631	0.601771	0.818062	6.08e-06
PSMA7	2.44373	1.95277	3.05811	5.77866e-15
PTBP1	2.61279	1.98268	3.44316	9.04454e-12
PTBP2	0.400347	0.287442	0.5576	6.113e-08
PTK2	0.496009	0.351691	0.699549	6.42168e-05
PTPN1	3.45333	2.34488	5.08575	3.49787e-10
PTRHD1	1.83572	1.47236	2.28875	6.75444e-08
PUF60	0.593583	0.411389	0.856466	0.00529945
PUM3	1.60532	1.18529	2.17419	0.00222561
PUS7	2.32078	1.7751	3.03419	7.45501e-10
PXN	1.97749	1.3947	2.80383	0.000129492
PYGL	1.93398	1.68649	2.21778	3.68821e-21
PYM1	1.74913	1.21815	2.51156	0.00245356
PYURF	2.51757	1.97003	3.2173	1.597e-13
QTRT2	2.66025	1.81897	3.89062	4.54723e-07
R3HDM2	0.315513	0.228913	0.434873	1.83393e-12
RAB13	1.87646	1.4948	2.35556	5.80125e-08
RAB33A	0.654527	0.573565	0.746917	3.14767e-10
RAB3GAP1	0.558961	0.391803	0.797435	0.00133406
RAB6A	0.507041	0.342729	0.750128	0.000676891
RAB6B	0.538588	0.45518	0.637279	5.66778e-13
RAB9A	1.66051	1.19141	2.31433	0.00275436
RACGAP1	1.91295	1.59154	2.29927	4.79738e-12
RAD18	2.49859	1.88321	3.31506	2.18623e-10
RAD54L	1.76315	1.49169	2.08401	2.97026e-11
RAI14	2.54825	2.03449	3.19175	3.87606e-16
RALY	2.95554	2.10644	4.14693	3.58141e-10
RALYL	0.621994	0.508829	0.760328	3.58267e-06
RANGAP1	0.475126	0.362761	0.622297	6.46929e-08
RARS2	2.45604	1.80247	3.3466	1.25414e-08
RAVER2	0.6742	0.500858	0.907534	0.00932767
RB1CC1	0.488869	0.373918	0.639159	1.67041e-07
RBBP4	2.30326	1.72245	3.07993	1.82758e-08
RBBP6	0.372649	0.276031	0.503085	1.14527e-10
RBFOX1	0.731855	0.614237	0.871996	0.000478982
RBFOX2	0.568947	0.455134	0.711221	7.33036e-07
RBFOX3	0.612354	0.492535	0.76132	1.01189e-05
RBM10	0.642836	0.466887	0.885091	0.00676771
RBM24	1.65128	1.32598	2.05639	7.44819e-06
RBM3	1.74543	1.32559	2.29825	7.25578e-05
RBM4	0.299928	0.193301	0.465372	7.75498e-08
RBM47	2.37912	1.91314	2.95859	6.54457e-15
RBM4B	0.359669	0.244816	0.528405	1.88768e-07
RBM7	3.30946	2.1958	4.98793	1.079e-08
RBMS1	2.57197	2.06219	3.20776	5.21816e-17
RBPMS	2.16048	1.73723	2.68686	4.37549e-12
RCC1	1.86026	1.50631	2.29739	8.19817e-09
RCC1L	3.55981	2.40559	5.26782	2.15486e-10
RCC2	1.64679	1.29944	2.08698	3.67365e-05
RDX	1.73733	1.3011	2.31981	0.000180978
RECQL	1.69584	1.33469	2.15472	1.54093e-05
RECQL4	1.30481	1.10178	1.54526	0.00204799
REXO1	0.641507	0.462446	0.889901	0.00784915
REXO2	3.61187	2.80981	4.64287	1.19955e-23
REXO4	0.39434	0.286532	0.542711	1.12421e-08
RFC2	2.92542	2.35676	3.63129	2.16955e-22
RFC3	1.89014	1.54387	2.31407	6.98992e-10
RFC4	1.76981	1.42061	2.20485	3.56538e-07
RIOK1	0.506557	0.340301	0.754039	0.000805527
RNASE6	1.59021	1.38114	1.83093	1.11878e-10
RNASEH2A	1.67485	1.42967	1.96207	1.70016e-10
RNPEP	3.23609	2.31704	4.51968	5.58608e-12
RPF1	2.5203	1.85341	3.42715	3.75393e-09
RPF2	1.94316	1.31441	2.87266	0.000866498
RPL15	0.56262	0.420785	0.752263	0.000104154
RPL17	1.38272	1.11708	1.71153	0.00290929
RPL21	1.40687	1.19351	1.65839	4.74312e-05
RPL22	0.506907	0.383572	0.669901	1.78505e-06
RPL23	0.612689	0.470503	0.797842	0.000276562
RPL23A	1.39049	1.09517	1.76543	0.00680358
RPL26	0.669941	0.510336	0.879463	0.00391311
RPL26L1	2.2732	1.80988	2.85513	1.64837e-12
RPL28	1.35492	1.0979	1.6721	0.00465036
RPL3	0.319361	0.245382	0.415642	2.06441e-17
RPL30	0.623887	0.486861	0.799479	0.00019247
RPL37	0.434947	0.325906	0.58047	1.57061e-08
RPL39	1.41337	1.22411	1.63188	2.39522e-06
RPL4	0.398588	0.313687	0.506467	5.21324e-14
RPL41	1.54384	1.2753	1.86893	8.41992e-06
RPL6	0.564817	0.429037	0.743566	4.66019e-05
RPL9	1.34326	1.14803	1.57167	0.000230602
RPN1	4.76305	3.46792	6.54185	5.38622e-22
RPN2	4.92628	3.59157	6.757	4.58103e-23
RPP40	2.70356	1.99482	3.66411	1.4375e-10
RPS10	1.2643	1.06459	1.50149	0.00750863
RPS12	0.665619	0.531821	0.833078	0.000377979
RPS15	1.4778	1.23268	1.77166	2.43622e-05
RPS17	0.643259	0.500533	0.826684	0.00056696
RPS2	1.53586	1.26379	1.8665	1.6077e-05
RPS20	0.701117	0.5367	0.915903	0.009208
RPS23	0.609413	0.467326	0.794699	0.000255649
RPS24	0.423976	0.337403	0.532762	1.79195e-13
RPS25	0.575441	0.446806	0.74111	1.86165e-05
RPS27L	1.87007	1.4272	2.45036	5.63399e-06
RPS3A	1.38568	1.21572	1.57939	1.02928e-06
RPS5	1.31461	1.1294	1.5302	0.000414809
RPS6	0.703022	0.566235	0.872853	0.00141414
RPS6KA4	1.64324	1.13363	2.38195	0.00873829
RPS7	1.50038	1.26191	1.78393	4.35029e-06
RPSA	1.2863	1.08445	1.52571	0.00384092
RPTOR	0.505715	0.376231	0.679763	6.24484e-06
RRM1	1.9666	1.49866	2.58064	1.07136e-06
RRM2	1.77005	1.56718	1.99917	3.79026e-20
RRP12	0.322434	0.226266	0.459476	3.76791e-10
RRP36	3.28507	2.23546	4.8275	1.39629e-09
RRP8	2.1496	1.37757	3.35431	0.0007492
RRP9	1.46118	1.11147	1.92092	0.00658541
RUVBL1	2.56042	1.80743	3.62712	1.21608e-07
SALL2	0.513162	0.42521	0.619304	3.52104e-12
SBF1	0.511534	0.433165	0.604081	2.77355e-15
SBNO1	0.422534	0.286897	0.622295	1.29253e-05
SEC31A	2.47818	1.78622	3.4382	5.5574e-08
SEC61A1	3.00107	2.24594	4.0101	1.07536e-13
SEC61B	2.46907	1.8491	3.2969	8.96832e-10
SECISBP2L	0.499591	0.39871	0.625996	1.63727e-09
SERBP1	2.36261	1.7157	3.25343	1.38749e-07
SERPINB6	2.47471	1.93978	3.15716	3.0534e-13
SERPINH1	1.81239	1.61526	2.03357	4.42833e-24
SETDB1	0.590999	0.404307	0.863898	0.00662224
SF3A2	0.711776	0.551857	0.918037	0.00882855
SF3A3	3.06447	2.17076	4.32614	1.94315e-10
SF3B2	0.347569	0.259545	0.465446	1.31601e-12
SF3B4	1.78054	1.17364	2.70127	0.00667095
SF3B6	1.86006	1.31319	2.63468	0.000476171
SGF29	0.368309	0.277539	0.488765	4.56293e-12
SH3PXD2B	1.76123	1.41692	2.18922	3.39933e-07
SLAIN2	4.1293	2.67018	6.38577	1.82489e-10
SLC16A1	1.8858	1.48609	2.39302	1.79355e-07
SLC25A5	1.44214	1.15416	1.80197	0.00127528
SLK	0.357952	0.276452	0.463478	6.50733e-15
SMARCA2	0.606736	0.493062	0.746617	2.35204e-06
SMC2	1.44909	1.14243	1.83808	0.0022318
SMC3	0.497779	0.413908	0.598645	1.26126e-13
SMC4	2.12131	1.78701	2.51815	8.32324e-18
SMCHD1	0.65487	0.480772	0.892014	0.00725969
SMN1	4.90367	3.23336	7.43685	7.27552e-14
SNRNP200	0.699741	0.537214	0.911439	0.00810675
SNRNP40	2.52339	1.98013	3.2157	7.27115e-14
SNRPB	1.62638	1.38333	1.91214	3.88412e-09
SNRPB2	2.27423	1.68118	3.07647	9.82878e-08
SNRPC	2.24551	1.7807	2.83164	8.13207e-12
SNRPD1	1.50629	1.11999	2.02583	0.00673962
SNRPD2	1.83409	1.56484	2.14968	7.00286e-14
SNRPF	1.63906	1.22875	2.18637	0.000775791
SNRPG	1.85627	1.5756	2.18694	1.40897e-13
SNRPN	0.618603	0.528546	0.724006	2.18937e-09
SNU13	0.422452	0.310016	0.575665	4.82591e-08
SPCS2	4.2271	2.8166	6.34395	3.42318e-12
SPOUT1	0.457445	0.334027	0.626464	1.08779e-06
SPTAN1	0.468428	0.394434	0.556303	5.3689e-18
SPTBN1	0.576135	0.472623	0.702318	4.83918e-08
SPTBN2	0.582099	0.515437	0.657382	2.78312e-18
SRA1	2.41436	1.89059	3.08325	1.61328e-12
SRFBP1	3.7452	2.21809	6.32367	7.78306e-07
SRP9	2.2607	1.70836	2.99162	1.15161e-08
SRPRB	2.69087	2.06747	3.50225	1.81628e-13
SRRT	1.64475	1.22657	2.20549	0.000886183
SRSF10	2.43781	1.74577	3.40417	1.68932e-07
SRSF3	1.78686	1.30221	2.45187	0.000323459
SRSF9	3.23633	2.24023	4.67533	3.91361e-10
SSBP1	3.41699	2.56004	4.56078	7.37015e-17
STAG2	0.630347	0.458751	0.866129	0.0044211
STAT3	3.02927	2.166	4.23659	9.42512e-11
STT3A	3.2084	2.32949	4.41891	9.50274e-13
STXBP1	0.60657	0.519328	0.708468	2.78902e-10
SUMO2	2.23388	1.56229	3.19417	1.0562e-05
SUPT4H1	1.87803	1.3556	2.60179	0.000151091
SYNE1	0.409962	0.321317	0.523061	7.31648e-13
SYNE2	0.589405	0.454427	0.764476	6.77948e-05
SYNJ1	0.548503	0.432144	0.696193	7.94505e-07
TAOK3	0.375483	0.280925	0.501869	3.65663e-11
TARBP2	2.19371	1.71056	2.81332	6.04295e-10
TBCA	2.19814	1.69637	2.84832	2.56259e-09
TBL2	3.81952	2.89718	5.03548	2.03215e-21
TCF20	0.493088	0.386115	0.629697	1.45484e-08
TEFM	3.40215	2.45433	4.71599	1.99895e-13
TENT4B	0.222088	0.132235	0.372996	1.28635e-08
TENT5A	2.13517	1.83828	2.48002	3.07582e-23
TEP1	1.72822	1.22682	2.43454	0.00175279
TFB2M	2.68209	1.98872	3.61721	1.01367e-10
THADA	4.17225	2.41632	7.2042	2.96384e-07
THUMPD3	3.94519	2.31604	6.7203	4.40805e-07
TIMELESS	1.80703	1.52236	2.14492	1.33258e-11
TIPARP	1.42102	1.19708	1.68686	5.92409e-05
TLN2	0.715053	0.56807	0.900068	0.00428047
TMED10	2.69907	1.97318	3.69201	5.22335e-10
TMEM131L	1.57371	1.17639	2.10521	0.0022568
TMEM214	4.29402	3.15636	5.84173	1.71079e-20
TMPO	1.88343	1.51697	2.33842	9.77639e-09
TNPO1	2.74869	1.87355	4.03261	2.33558e-07
TOB2	0.515314	0.414962	0.639935	1.98026e-09
TONSL	1.38346	1.12729	1.69784	0.00189167
TOP2A	1.4436	1.30367	1.59854	1.68973e-12
TP53RK	3.54459	2.45024	5.12771	1.85419e-11
TPR	0.576064	0.450649	0.736381	1.06917e-05
TPT1	1.41938	1.13447	1.77583	0.00218684
TPX2	1.56289	1.38782	1.76004	1.7456e-13
TRA2B	3.4908	2.26022	5.39139	1.73102e-08
TRIM28	1.45904	1.12041	1.90001	0.00505012
TRIM56	1.61664	1.29894	2.01204	1.68578e-05
TRIP6	1.95425	1.68033	2.27282	3.44648e-18
TRIR	1.4476	1.13627	1.84423	0.00275395
TRMT112	1.89919	1.45023	2.48715	3.14304e-06
TRMT13	1.67368	1.22647	2.28394	0.00116628
TRMT2B	3.62397	2.7464	4.78196	8.93016e-20
TRNAU1AP	2.88115	2.20069	3.772	1.38056e-14
TRPT1	1.60284	1.18068	2.17594	0.00248752
TRUB1	0.374776	0.275927	0.509039	3.33917e-10
TSEN15	2.11313	1.56235	2.85808	1.19818e-06
TSEN34	2.46423	1.80579	3.36277	1.30142e-08
TSPYL1	0.39367	0.300886	0.515068	1.06178e-11
TSR2	0.450023	0.309441	0.654474	2.9357e-05
TTF2	3.42104	2.53802	4.61127	6.79111e-16
TTK	1.81393	1.5411	2.13506	8.04417e-13
TUBA1C	1.85644	1.66891	2.06505	4.89925e-30
TUBB	1.84369	1.48587	2.28767	2.74201e-08
TUBB6	1.60524	1.42605	1.80693	4.61346e-15
TUT1	0.416847	0.299533	0.580107	2.1104e-07
TWF1	3.10455	2.33161	4.13372	8.81935e-15
TWISTNB	4.56115	3.21796	6.46498	1.50387e-17
TYW1	3.46676	2.53247	4.74573	8.52784e-15
UBA52	1.38466	1.08964	1.75954	0.00776223
UBE2O	0.447329	0.3438	0.582034	2.10134e-09
UBR5	0.526919	0.400909	0.692534	4.33483e-06
UCHL5	0.293069	0.181364	0.473577	5.37103e-07
ULK1	0.51965	0.371241	0.727389	0.000136203
UPF3A	0.473325	0.339972	0.658985	9.4196e-06
URB2	1.62858	1.14343	2.31959	0.00687763
UTP15	4.31735	2.62961	7.0883	7.3834e-09
UTP18	2.8938	2.01008	4.16604	1.09569e-08
UTP20	2.88755	1.89143	4.40827	8.99066e-07
UTP6	2.54851	1.63938	3.9618	3.23946e-05
VARS	0.574972	0.423992	0.779714	0.000369411
VASP	2.7302	2.12468	3.50829	4.14537e-15
VIM	1.59656	1.42547	1.78817	5.96652e-16
WARS2	4.32065	3.01808	6.18539	1.30329e-15
WASF2	1.79829	1.37577	2.35056	1.74997e-05
WDHD1	2.1973	1.72733	2.79514	1.44166e-10
WDR1	3.19954	2.33337	4.38725	5.18258e-13
WDR6	0.545504	0.439847	0.676542	3.43869e-08
WDR61	2.09048	1.60944	2.7153	3.26283e-08
XRN2	3.66093	2.6963	4.97069	9.06796e-17
YBX1	1.83952	1.47436	2.29514	6.7192e-08
YBX3	1.78409	1.50023	2.12166	5.84335e-11
YWHAH	1.27259	1.05949	1.52856	0.00993698
YWHAZ	2.85804	1.98508	4.11488	1.63191e-08
ZBTB12	0.581703	0.482691	0.701024	1.26072e-08
ZBTB26	0.573744	0.405867	0.81106	0.00165704
ZBTB44	0.285539	0.203431	0.400787	4.31119e-13
ZC3H12B	0.291439	0.218143	0.389363	7.31118e-17
ZC3H12C	0.482651	0.332003	0.701656	0.000135628
ZC3HAV1	2.01212	1.5036	2.69263	2.55207e-06
ZCCHC8	2.02526	1.25279	3.27404	0.00398196
ZCCHC9	4.18115	3.07227	5.69027	9.15648e-20
ZCRB1	0.679067	0.508631	0.906615	0.00866872
ZEB1	0.47112	0.392796	0.565062	4.93254e-16
ZFP36L2	2.09982	1.70625	2.58417	2.46262e-12
ZFR2	0.63918	0.502199	0.813523	0.000275754
ZIC1	1.56533	1.33195	1.8396	5.33889e-08
ZMPSTE24	2.62097	1.90031	3.61493	4.26465e-09
ZNF205	0.60127	0.443471	0.815217	0.00105525
ZNF207	4.70934	2.93104	7.56656	1.50655e-10
ZNF267	3.39814	2.1735	5.3128	8.10379e-08
ZNF28	2.25379	1.64566	3.08666	4.09249e-07
ZNF319	0.448708	0.323949	0.621516	1.42725e-06
ZNF320	1.76299	1.26293	2.46106	0.000863793
ZNF521	1.36086	1.1219	1.6507	0.00176278
ZNF700	2.80369	2.06332	3.80973	4.40211e-11
ZNF768	0.518761	0.393101	0.68459	3.52587e-06
ZNF800	2.45232	1.56634	3.83944	8.78494e-05
ZRANB1	0.392279	0.317511	0.484654	4.19261e-18
ZYX	2.16271	1.84689	2.53254	9.977e-22

## Sheet: 05.prognosis-related immune gen
id	HR	HR.95L	HR.95H	pvalue
A2M	1.572	1.33298	1.85387	7.63638e-08
ACTG1	3.46414	2.53898	4.72642	4.58995e-15
ACVR1B	0.600555	0.439411	0.820794	0.00137962
ACVR2A	0.492785	0.321666	0.754936	0.00114729
ACVRL1	1.57116	1.265	1.95141	4.39424e-05
AEN	1.84363	1.52587	2.22755	2.32534e-10
AKT1	1.67249	1.1904	2.34982	0.00303092
AKT2	1.98618	1.51081	2.61113	8.81584e-07
AMH	0.75619	0.661163	0.864875	4.52905e-05
ANGPTL2	0.681015	0.601995	0.770407	1.02788e-09
AP3B1	1.928	1.23477	3.01041	0.00388242
APOBEC3C	2.17809	1.88778	2.51304	1.46898e-26
APOM	0.602696	0.431583	0.841651	0.00296137
AR	1.31549	1.08419	1.59614	0.00544829
ARAF	3.76699	2.61625	5.42388	9.97159e-13
ARRB1	0.556816	0.459376	0.674923	2.43533e-09
B2M	1.87639	1.60101	2.19913	7.73104e-15
BCL10	3.33696	2.33927	4.76015	2.94987e-11
BID	0.364452	0.284438	0.466974	1.45184e-15
BIRC5	1.48023	1.34446	1.62972	1.3502e-15
BMP1	2.60048	2.10963	3.20553	3.41304e-19
BMP2	0.51282	0.451523	0.582437	8.45493e-25
BMPR1A	0.300288	0.20485	0.440189	7.05102e-10
BRAF	0.482677	0.34072	0.683778	4.14775e-05
BTK	1.79836	1.46422	2.20876	2.19428e-08
C3AR1	1.3656	1.19992	1.55417	2.33909e-06
CALCRL	0.68219	0.610385	0.762443	1.58696e-11
CALR	3.25523	2.53869	4.17402	1.34439e-20
CANX	2.79246	1.97696	3.94435	5.61349e-09
CASP3	2.33091	1.95787	2.77502	1.8962e-21
CBLB	0.432579	0.301628	0.620383	5.23671e-06
CCRL2	2.55362	1.99135	3.27465	1.48555e-13
CD320	1.5628	1.26344	1.93308	3.86604e-05
CD4	1.51429	1.29219	1.77456	2.9332e-07
CD48	1.99196	1.70744	2.3239	1.89648e-18
CD72	2.02998	1.69803	2.42682	7.73749e-15
CD74	1.52914	1.3631	1.7154	4.42676e-13
CD86	1.56675	1.34139	1.82997	1.45594e-08
CDK4	1.25129	1.15138	1.35988	1.29134e-07
CHGA	0.74454	0.682041	0.812766	4.27249e-11
CHGB	0.687473	0.625613	0.755451	6.7395e-15
CKLF	2.49923	2.02873	3.07886	7.47001e-18
CMTM3	3.30253	2.54836	4.27989	1.67963e-19
CMTM4	0.538739	0.460544	0.63021	1.07296e-14
CMTM6	3.38583	2.6104	4.3916	3.91574e-20
CMTM7	2.03402	1.64378	2.5169	6.45362e-11
CRHR1	0.336002	0.243758	0.463155	2.73065e-11
CRLF3	4.12856	2.84582	5.98949	8.07255e-14
CSRP1	1.50718	1.29863	1.74923	6.71146e-08
CTSL	2.25887	1.91544	2.66386	3.51184e-22
CTSS	1.66243	1.46358	1.88829	5.29016e-15
CXCL16	1.95996	1.59785	2.40414	1.06968e-10
CXCR4	1.61427	1.43009	1.82216	9.34114e-15
CYBB	1.36424	1.20046	1.55035	1.93481e-06
DDX58	1.50989	1.25409	1.81788	1.35823e-05
ECPAS	0.634664	0.468331	0.860071	0.003367
EDNRB	0.819569	0.731586	0.918134	0.000594621
EED	4.24749	2.54181	7.09776	3.3714e-08
ENDOU	0.587042	0.416881	0.826659	0.00228863
ENG	1.80777	1.52093	2.1487	1.85635e-11
ERAP1	1.79556	1.40687	2.29165	2.5687e-06
FCER1G	1.70491	1.50623	1.9298	3.19315e-17
FCGRT	2.08315	1.6979	2.55582	2.00722e-12
FGF12	0.54881	0.476337	0.632311	1.01237e-16
FGF13	0.338692	0.245519	0.467224	4.22964e-11
FGF14	0.648654	0.507687	0.828762	0.000535565
FGF9	0.460832	0.34124	0.622335	4.32824e-07
FGR	1.75331	1.44788	2.12319	8.94448e-09
FLT3LG	2.27454	1.46988	3.51971	0.000225061
FYN	0.541069	0.427479	0.684844	3.24424e-07
GBP2	1.24183	1.11655	1.38117	6.55812e-05
GMFG	1.74774	1.49766	2.03958	1.37606e-12
GNAI1	0.60321	0.521245	0.698063	1.16998e-11
GPI	2.12103	1.69468	2.65466	5.13447e-11
GRN	2.63923	2.13666	3.26001	2.1684e-19
HCK	1.47706	1.26892	1.71933	4.81903e-07
HDAC1	2.54298	1.99786	3.23685	3.39646e-14
HDGFL3	0.261753	0.178795	0.383203	5.49422e-12
HLA-A	1.74646	1.51824	2.00898	5.99716e-15
HLA-B	1.61109	1.415	1.83435	5.92115e-13
HLA-C	1.60866	1.40666	1.83966	3.80805e-12
HLA-DMA	1.61426	1.41292	1.8443	1.85011e-12
HLA-DMB	1.61601	1.42963	1.82669	1.63499e-14
HLA-DOA	1.43618	1.28197	1.60893	4.21006e-10
HLA-DPA1	1.46292	1.31901	1.62253	6.0011e-13
HLA-DPB1	1.49149	1.3328	1.66906	3.27495e-12
HLA-DQA1	1.44825	1.30673	1.60509	1.6739e-12
HLA-DQA2	1.23311	1.13102	1.34442	2.01373e-06
HLA-DQB1	1.37809	1.24508	1.5253	5.90385e-10
HLA-DRA	1.4424	1.30995	1.58825	9.07443e-14
HLA-DRB1	1.42231	1.28492	1.5744	1.07178e-11
HLA-DRB5	1.2062	1.10274	1.31937	4.1782e-05
HLA-E	1.52964	1.27996	1.82803	2.94302e-06
HLA-F	1.53654	1.31221	1.79922	9.58615e-08
HMGB1	1.69284	1.16675	2.45613	0.00556921
HMOX1	1.54441	1.38711	1.71955	2.18166e-15
HNF4G	2.59941	1.97064	3.4288	1.36946e-11
HSP90AB1	0.500475	0.356977	0.701658	5.93992e-05
HTR1A	0.415358	0.292053	0.590723	1.01181e-06
IDO1	1.35253	1.1535	1.58592	0.000200626
IFIH1	1.64565	1.41453	1.91453	1.10861e-10
IFNAR2	3.1408	2.16947	4.54703	1.33942e-09
IFNLR1	1.60069	1.2538	2.04355	0.000160113
IKBKB	3.1399	1.95953	5.03128	1.97074e-06
IKBKE	2.41894	1.87581	3.11932	9.86749e-12
IL10RA	1.51011	1.29792	1.75699	9.54303e-08
IL10RB	3.13093	2.44483	4.00957	1.51622e-19
IL13RA1	1.73498	1.45717	2.06575	6.0654e-10
IL15RA	1.60197	1.23148	2.08394	0.000445571
IL16	2.13973	1.58357	2.89121	7.29838e-07
IL17RD	0.530022	0.423885	0.662734	2.573e-08
IL18	1.6238	1.39028	1.89655	9.38709e-10
IL1R2	1.91608	1.6258	2.25818	8.60343e-15
IL2RG	2.20281	1.82329	2.66133	2.70722e-16
IRF7	1.57121	1.36631	1.80684	2.33111e-10
ITGB2	1.55273	1.35883	1.77431	1.01177e-10
JAG1	1.61363	1.39041	1.87269	2.99919e-10
LANCL1	0.571699	0.434488	0.75224	6.51948e-05
LIMS1	2.93368	2.26748	3.79562	2.63168e-16
LRSAM1	0.287818	0.216613	0.38243	8.81374e-18
LTB4R	1.60492	1.26543	2.03548	9.56292e-05
LTBP1	1.51035	1.31893	1.72955	2.4684e-09
LYN	1.90074	1.59197	2.26939	1.23939e-12
LYZ	1.53028	1.40444	1.66739	2.53929e-22
MALT1	2.84274	2.00534	4.02983	4.40859e-09
MANF	2.41081	1.94333	2.99073	1.23355e-15
MAP3K14	1.97495	1.49624	2.60681	1.54644e-06
MAPK1	0.519374	0.390605	0.690593	6.58956e-06
MAPK3	0.499626	0.334507	0.746252	0.000699369
MAPK8	0.25265	0.189652	0.336575	5.38891e-21
MAPT	0.535459	0.476767	0.601376	5.3489e-26
MDK	1.66088	1.49284	1.84783	1.13753e-20
MICB	2.0886	1.70917	2.55225	6.01594e-13
MR1	2.64317	2.10504	3.31886	5.83334e-17
MSR1	1.75633	1.56921	1.96575	1.1315e-22
MYDGF	2.4392	1.98389	2.99901	2.70584e-17
NAMPT	1.64518	1.49513	1.8103	1.92718e-24
NCK1	3.00723	2.02018	4.47653	5.81774e-08
NFATC3	1.99875	1.28599	3.10658	0.0020851
NFKB1	2.41305	1.72863	3.36846	2.26734e-07
NLRX1	0.589942	0.421504	0.82569	0.00209388
NOD1	2.0576	1.63512	2.58923	7.58423e-10
NOD2	1.8883	1.42359	2.50471	1.03203e-05
NOX4	2.89399	2.26306	3.70082	2.47157e-17
NR1D2	0.391271	0.310536	0.492997	1.74626e-15
NR3C2	0.612222	0.495456	0.756506	5.50815e-06
NRAS	2.59931	1.96374	3.44058	2.43605e-11
NRG3	0.473401	0.400522	0.559542	1.82913e-18
NRP1	1.97582	1.66317	2.34723	9.30329e-15
OAS1	1.47505	1.33573	1.62891	1.6116e-14
PAK1	1.24755	1.07721	1.44483	0.00314886
PAK3	0.566715	0.475394	0.675578	2.38005e-10
PAK5	0.445199	0.360776	0.549376	4.58372e-14
PCSK1	1.246	1.11066	1.39782	0.00017746
PCSK2	0.736074	0.648272	0.835768	2.26494e-06
PDGFRB	1.62644	1.33895	1.97565	9.52844e-07
PDIA2	0.637699	0.539316	0.75403	1.42333e-07
PDIA3	3.16237	2.46262	4.06095	1.83437e-19
PIK3CB	0.381964	0.26915	0.542064	7.10036e-08
PIK3R5	1.62642	1.31861	2.00608	5.525e-06
PLAU	1.61339	1.4648	1.77706	2.91845e-22
PLSCR1	1.93205	1.68558	2.21457	3.13049e-21
PLTP	1.67221	1.43641	1.94672	3.3638e-11
PLXNA3	1.46493	1.13555	1.88986	0.00330174
PLXNB2	1.50141	1.15098	1.95854	0.00272774
PML	2.20028	1.62321	2.9825	3.74987e-07
PPP3CA	0.516195	0.395385	0.67392	1.16801e-06
PPP3CB	0.304442	0.228245	0.406077	5.8789e-16
PPP4C	2.39251	1.91335	2.99168	2.00473e-14
PRKCB	0.651539	0.560758	0.757016	2.1919e-08
PRKCG	0.769276	0.660404	0.896096	0.000754289
PRKCQ	0.458034	0.345255	0.607652	6.1579e-08
PROCR	1.75188	1.49883	2.04764	1.86305e-12
PSMB8	1.79984	1.5499	2.09009	1.31507e-14
PSME1	1.69795	1.34527	2.14309	8.32285e-06
PSME2	1.88547	1.52764	2.32712	3.50224e-09
PSME3	3.93949	2.35698	6.58452	1.68232e-07
PTGDR2	0.576372	0.410317	0.809629	0.00148316
PTGDS	0.830363	0.76486	0.901475	9.24924e-06
PTK2	0.496009	0.351691	0.699549	6.42167e-05
PTN	1.64488	1.42429	1.89964	1.25343e-11
PTPN6	1.60679	1.34573	1.91849	1.585e-07
RAC1	5.00214	3.25166	7.69496	2.37267e-13
RARG	1.46849	1.13505	1.89987	0.00345598
RFXANK	1.5245	1.19113	1.95118	0.000810714
RHOA	4.87275	3.18752	7.44895	2.60448e-13
S100A10	1.46563	1.3222	1.62462	3.45531e-13
S100A11	1.75175	1.56628	1.95917	9.35719e-23
S100A16	1.81611	1.57134	2.09902	6.56731e-16
S100A2	1.59436	1.33458	1.90469	2.73781e-07
S100A6	1.60573	1.42661	1.80734	4.23836e-15
SEM1	2.49513	1.89045	3.29323	1.06553e-10
SEMA4A	0.599549	0.469474	0.765665	4.13501e-05
SEMA4D	0.689073	0.554995	0.855541	0.000743125
SEMA6B	0.573638	0.501794	0.655769	3.94021e-16
SFTPD	0.4602	0.341151	0.620791	3.74127e-07
SH3BP2	1.455	1.12431	1.88297	0.00436366
SHC1	1.9518	1.69622	2.2459	9.7391e-21
SLC11A1	1.57734	1.41633	1.75666	1.07713e-16
SLC22A17	0.470153	0.390556	0.565974	1.53011e-15
SLC40A1	1.44256	1.22834	1.69414	7.91765e-06
SLPI	1.28905	1.19224	1.39372	1.83814e-10
SOCS1	2.05662	1.79504	2.35631	2.78522e-25
SOS1	0.503449	0.365582	0.693308	2.62881e-05
SST	0.868553	0.784633	0.961447	0.00656149
SSTR1	0.486071	0.399233	0.591799	6.76326e-13
SSTR2	0.456996	0.381161	0.547919	2.70908e-17
STAT3	3.02927	2.166	4.23659	9.42512e-11
SYK	1.41954	1.20059	1.67841	4.15007e-05
TANK	4.28091	2.98664	6.13606	2.44112e-15
TAP1	1.56752	1.36325	1.80239	2.7937e-10
TAPBP	2.05377	1.55375	2.7147	4.28972e-07
TAPBPL	2.47	1.91706	3.18242	2.68907e-12
TCF7L2	0.298328	0.220739	0.40319	3.53271e-15
TGFB1	1.73811	1.45108	2.08193	1.93907e-09
TGFBR1	2.18554	1.72448	2.76987	9.95594e-11
TGFBR2	1.56766	1.29293	1.90076	4.79735e-06
THRB	0.686274	0.538835	0.874056	0.00228245
TLR2	1.52385	1.33043	1.74538	1.18279e-09
TLR3	2.0848	1.64118	2.64832	1.76151e-09
TLR8	1.88578	1.56324	2.27487	3.40392e-11
TNC	1.51809	1.36674	1.68621	6.6764e-15
TNFRSF10B	1.90588	1.573	2.3092	4.54675e-11
TNFRSF10C	2.52449	2.02983	3.13971	8.62926e-17
TNFRSF12A	1.65339	1.50079	1.82151	2.51217e-24
TNFRSF18	2.45019	1.94535	3.08604	2.68115e-14
TNFRSF19	1.78583	1.5403	2.0705	1.53984e-14
TNFRSF1A	2.13634	1.81396	2.51603	9.46031e-20
TNFRSF1B	1.38415	1.18405	1.61806	4.49377e-05
TNFSF13B	1.32586	1.18385	1.4849	1.0614e-06
TNFSF8	2.41333	1.90568	3.05621	2.64226e-13
TPM2	1.29892	1.14457	1.47409	5.07906e-05
TPT1	1.41938	1.13447	1.77583	0.00218684
TRIM22	1.63749	1.42866	1.87686	1.3924e-12
TRIM5	2.48145	2.01674	3.05322	8.65975e-18
TYROBP	1.53703	1.35983	1.73733	6.07529e-12
UBXN1	0.301349	0.226256	0.401364	2.34666e-16
UNC93B1	2.09625	1.77345	2.47781	4.13228e-18
VEGFB	1.682	1.28469	2.20219	0.000155531
VIM	1.59656	1.42547	1.78817	5.96652e-16
VIP	0.705977	0.554003	0.899642	0.00487707
VIPR1	0.488838	0.323101	0.739589	0.000704374
ZC3HAV1	2.01212	1.5036	2.69263	2.55207e-06
ZYX	2.16271	1.84689	2.53254	9.97699e-22

## Sheet: 06.stromal activatio
Gene name
DCN
PAPPA
SFRP4
THBS2
LY86
CXCL14
FOXF1
COL10A1
ACTG2
APBB1IP
SH2D1A
SULF1
MSR1
C3AR1
FAP
PTGIS
ITGBL1
BGN
CXCL12
ECM2
FCGR2A
MS4A4A
WISP1
COL1A2
MS4A6A
EDNRA
VCAM1
GPR124
SCUBE2
AIF1
HEPH
LUM
PTGER3
RUNX1T1
CDH5
PIK3R5
RAMP3
LDB2
COX7A1
EDIL3
DDR2
FCGR2B
LPPR4
COL15A1
AOC3
ITIH3
FMO1
PRKG1
PLXDC1
VSIG4
COL6A3
SGCD
COL3A1
F13A1
OLFML1
IGSF6
COMP
HGF
GIMAP5
ABCA6
ITGAM
MAF
ITM2A
CLEC7A
ASPN
LRRC15
ERG
CD86
TRAT1
COL8A2
TCF21
CD93
CD163
GREM1
LMOD1
TLR2
ZEB2
C1QB
KCNJ8
KDR
CD33
RASGRP3
TNFSF4
CCR1
CSF1R
BTK
MFAP5
MXRA5
ISLR
ARHGAP28
ZFPM2
TLR7
ADAM12
OLFML2B
ENPP2
CILP
SIGLEC1
SPON2
PLXNC1
ADAMTS5
SAMSN1
CH25H
COL14A1
EMCN
RGS4
PCDH12
RARRES2
CD248
PDGFRB
C1QA
COL5A3
IGF1
SP140
TFEC
TNN
ATP8B4
ZNF423
FRZB
SERPING1
ENPEP
CD14
DIO2
FPR1
IL18R1
HDC
TXNDC3
PDE2A
RSAD2
ITIH5
FASLG
MMP3
NOX4
WNT2
LRRC32
CXCL9
ODZ4
FBLN2
EGFL6
IL1B
SPON1
CD200
