# Supplementary material for: RNA Binding Protein-Mediated Immunosuppressive Tumor Microenvironment Contributes to Poor Prognosis in High-Grade Gliomas
Source: Research Square preprint supplement (doi:10.21203/rs.3.rs-1033119/v1), 2021-11-22
Supplement: Supplementary file 2 [file 5e7a2f676a389c1bd878ae5a.xlsx]

## Sheet: Supplementary Table S1
Supplementary Table S1. RBPs were obtained from the Eukaryotic RNA binding proteins (EuRBPDB) website （n=2949）.
Gene name
LAS1L
LASP1
RBM5
ARF5
FKBP4
RBM6
RECQL
UPF1
SLC25A5
POLR2J
DHX33
LIG3
REXO5
SPPL2B
MSL3
CREBBP
IBTK
MYCBP2
YBX2
AP2B1
GGCT
PAF1
ELAC2
CCDC124
RPUSD1
LUC7L
TSR3
SPAG9
HEATR5B
SEC62
RPS20
CSDE1
BAZ1B
EEF1AKNMT
ZNF207
UQCRC1
NCAPD2
ELOA
AKAP8L
UTP18
PTBP1
LARS2
ANLN
PPP5C
ZBTB32
BRCA1
EHD3
MVP
POLR3B
ANGEL1
DNASE1L1
UFL1
ZC3H3
CAPN1
MDH1
YAF2
MATR3
AGPS
ZNF582
SNAI2
ZRANB1
ZFP64
MRE11
AQR
CPS1
RTF2
NDUFS1
RB1CC1
ERP44
GCLM
EHD2
TOMM34
SEC63
KPNA6
VIM
RNASET2
BCLAF1
TFB1M
HMGB3
NUP160
SARS
RANBP3
ARID4A
ZCCHC8
ABCF2
UBA6
VCL
DAPK2
ADSS
RFC1
RPL26L1
NSUN2
MRI1
BOD1L1
EDC4
TRIO
MTREX
RAI14
STAU2
LSG1
PARP3
CAPG
TRIT1
CTNNA1
HSPA5
DSG2
GEMIN8
OFD1
YTHDC2
POLR2B
TPR
MAP4
NOP16
ZNF800
MRPS10
RSF1
CELF2
FAM120A
R3HDM1
RFC2
PTCD2
LIMA1
MAPK9
POLQ
THOC3
PLEKHA5
RRP12
MRTO4
THRAP3
ARID4B
KIF1B
SYNE2
NOP58
CUL1
CYFIP2
TAB2
EIF2AK2
USP36
PUM2
MRPL43
ZFR
RC3H2
PKP2
GDI2
SEC61A1
PPP1R12A
ZC3H11A
RIOK2
UNKL
PARP12
ALDH18A1
TARBP1
GATB
YBX3
WNK1
CCAR1
OGFR
SNRNP40
SFSWAP
ZNF112
CS
MRPS24
WAPL
POLD1
EIF4B
RPL18
U2AF2
HAGH
TNPO3
SUGP2
SLC12A2
CNN2
DDX20
SBNO2
AP3D1
GNAI3
IPO5
OAT
WDR3
PKN2
WDR18
KARS
ADAT1
SPEN
ZC3H15
SLK
CDK13
YBX1
ELAVL1
DIP2B
ASPM
LRRC40
TRMT11
THUMPD1
DDX3Y
PKM
DHX29
DNTTIP2
TP53BP1
RRP15
DHX8
IARS2
ROCK1
HEATR6
COASY
INPP5A
GPKOW
FTSJ1
POLR1A
SRBD1
KIF2A
PSME4
NUP133
NUCKS1
VPS35
PHRF1
ELP1
PFN2
SMG6
JMJD6
ASNS
PABPC1
TCOF1
RAD18
MAP4K4
RPL31
WDR1
BUD23
DAZAP1
MBD3
HLTF
FAM50A
CPSF1
ACTN1
TFRC
AFF4
SMC1A
HSD17B10
P4HA2
TRNT1
ACADVL
SIDT1
MCM2
NLE1
SDHA
FERMT2
IGF2BP2
NSF
CLASP1
MRPS34
NCBP3
NUAK1
LMAN1
HACD3
ZZEF1
ENO1
EIF4G3
GTSE1
ACAT1
ZNF638
MARK3
FNDC3B
FRYL
TMEM131
FSCN1
WDR62
RAB7A
SART3
EXOSC7
MKRN2
MCM6
REXO2
RBM7
RBMS2
BAZ2A
PTPN23
SPAG5
GPATCH1
MBNL3
XAB2
ARHGEF1
TOP2B
TM9SF3
GTF3C1
SNRPA
EXOSC5
DYNC1I2
CAPZB
MCCC1
SYNJ2
RBFOX1
NRDC
TNRC6C
MYH7B
THOC1
XRCC5
REXO1
SAR1A
DDX1
EPB41L2
RABL2B
DDX43
RIF1
SMARCA2
SRCAP
PUM3
CNOT4
HSP90AA1
EXD2
WDR70
BZW1
MRPL22
GEMIN5
XPO1
TUT7
ULK2
TNPO1
PLOD1
DIS3
TDRD3
NUFIP1
PDS5B
RRAGB
RPS5
YTHDC1
PPIE
ZMPSTE24
NOA1
WBP11
TXLNA
APOB
RAB10
HADHA
ATRX
MYNN
CPNE3
CTTN
MTIF2
EPS15
CHERP
RAD54L
DNAJA1
NFX1
DIMT1
IPO11
MRPL28
RBM22
TXLNG
HUWE1
ZW10
TRIP6
SRRT
PSMC5
NOP14
ADD1
SF3B2
DNM1L
METTL2A
CNOT3
DDX18
KHSRP
TPX2
XRN2
DYNLL1
RPL6
ESF1
OAS1
GCN1
RPLP0
PXN
TRMT6
PEBP1
FUS
GANAB
RBM41
DDX24
DHX32
PAPOLA
CCNK
PCBP4
MRPS33
NUDC
P3H2
GOLGA3
PABPC4
AARS
KIF4A
TNRC6A
RBM27
PUS7
DLD
MAP3K20
FH
CDV3
ALKBH5
SPAG7
ZFHX4
ZC3HC1
HECTD1
HNRNPC
SUPT16H
GEMIN2
DAZL
PHGDH
EZR
MYL6
AGO1
DPYSL2
GPATCH2
NUP50
LRRFIP2
CDC6
AAAS
MSH2
ARCN1
PSMD5
NUP188
CWF19L1
BTAF1
TDRD1
SRPK1
MRPS18A
HSP90AB1
CDC5L
ITPR3
DSP
HNRNPH3
ERMP1
RAB18
SETD1A
CIRBP
HNRNPM
POLR2E
POLRMT
GADD45B
TRMT2A
RANBP1
MED15
CRKL
SF3A1
SPECC1L
SNRPD3
PES1
MAPK1
TOP3B
ESS2
LGALS1
PATZ1
TFIP11
EIF3L
SNU13
MICALL1
POLR2F
44442
DDX17
TCF20
RTCB
GTPBP1
POLDIP3
RAB36
SBF1
CYB5R3
AP1B1
MCAT
THOC5
MCM5
APOBEC3H
TTLL12
RPL3
ZMAT5
RBFOX2
ASCC2
MYH9
EIF3D
TNRC6B
RANGAP1
ZC3H7B
PHF5A
ACO2
POLR3H
TRMU
KHNYN
FKBP3
RBM23
PRMT5
PYGL
PSMC6
ALKBH1
SNW1
CEP128
ERH
SRSF5
EIF5
DICER1
MTHFD1
ZC3H14
TELO2
PSMC1
RPS6KA5
ACIN1
APEX1
PABPN1
SRP54
CHD8
SEC23A
PNN
PYGB
ZMYND8
PABPC1L
SALL4
ADNP
CSTF1
PRPF6
MTG2
PSMA7
DIDO1
EEF1A2
ARFRP1
NDUFAF5
SEC23B
CRNKL1
SAMHD1
NOP56
MAPRE1
AHCY
FAM83D
DHX35
CELF4
RBFA
USP14
VAPA
METTL4
SMCHD1
RNMT
MIB1
RIOK3
CSTF2
POLA1
NKAP
NXT2
MCTS2P
STAG2
PLS3
SMARCA1
ZC3H12B
RBBP7
FMR1
PCSK1N
EMD
PGK1
EEA1
HTATSF1
PIN4
MAGED2
RBM3
FNDC3A
PARP4
MRPS31
KPNA3
INTS6
NUTF2
NUP93
N4BP1
ZNF423
CTCF
ACD
POLR2C
USB1
PSMD7
ESRP2
MPG
TSC2
ABCC1
MTHFSD
HAGHL
CAPN15
PIEZO1
GSPT1
EARS2
SALL1
MAZ
KAT8
NOMO1
RNF40
KNOP1
HERC1
TRIP4
RAB11A
RPAP1
EHD4
ZNF106
TJP1
DNAJC17
EIF3J
MYEF2
INTS9
POP1
RAB2A
EIF3E
UBR5
EEF1D
ERI1
R3HCC1
GSR
UBXN8
MCM4
KCNN4
HNRNPL
SARS2
SNRNP70
CLASRP
PIH1D1
PPP1R13L
ERCC2
RNASEH2A
SF3A2
TRMT1
NOVA2
SNAPC2
PPP6R1
AKAP8
CASP14
POP4
RPS16
FBL
GPI
POLR2I
ZFR2
CACTIN
CCDC9
HNRNPUL1
PLIN3
MRPL4
RPS19
NOP53
CDC37
GRWD1
LIG1
FAM83E
PPP2R1A
TNPO2
PRPF31
RPL18A
DDX49
SUGP1
ATP13A1
ZNF574
ETHE1
GTPBP10
DNAJC2
TWISTNB
HBP1
DUS4L
ZC3HAV1
OGDH
H2AFV
BRAT1
SSBP1
GARS
HSPB1
PDAP1
PTCD1
EIF3B
AIMP2
RBM28
LSM5
PLOD3
PHF14
GIMAP2
MRPL32
RHEB
POLD2
TBL2
EIF4H
SEC61B
ELAVL2
FUBP3
DDX58
EDF1
SETX
PDLIM1
DNMBP
EIF3A
DDX50
SEC23IP
NPM3
TNKS2
GBF1
CPEB3
LARP4B
GTPBP4
BCCIP
MTPAP
PITRM1
STN1
GLRX3
SMC3
TFAM
RPL28
NUFIP2
RPL19
UBTF
PSMD3
CASC3
44443
DHX40
KPNB1
RECQL5
INTS2
PFN1
SLC25A11
NUP88
CCDC47
DRG2
FTSJ3
UTP6
DDX5
PSMD11
ASIC2
DHX58
RAB5C
PTGES3L-AARSD1
MRPL27
LRRC59
LUC7L3
EFTUD2
YWHAE
SLC9A3R1
ALDOC
SUPT6H
RAB34
SLAIN2
MAPK10
RPL34
GAR1
FRG1
DHX15
NEIL3
NCAPG
UGDH
PPARGC1A
DDX25
ZBTB16
MTCH2
HSPA8
EHD1
PUS3
DCPS
PPP6R3
CCDC86
PRPF19
CHORDC1
EIF4G2
DDX6
CARS
C11orf58
RPS13
NUP98
PSMD9
PRDM4
COQ5
CORO1C
CAPRIN2
MLEC
ATP5F1B
RSRC2
KRT18
METAP2
LTA4H
MAGOHB
PARP11
OAS3
OAS2
EIF2B1
DDX55
ENDOU
CAND1
RAB5B
NUP107
CNOT2
TIMELESS
CPSF6
KRR1
MRPL51
GAPDH
NOP2
CHD4
USP5
TPI1
APOBEC1
LDHB
AICDA
RAB35
SRSF9
BTN3A3
TDP2
PAK1IP1
RNGTT
HINT3
MTRF1L
SRSF3
MRPL18
MCM3
MDN1
RBM24
RAB23
KHDRBS2
ASCC3
SMAP1
RPS12
HBS1L
PEX7
ZBTB24
QKI
BYSL
MRPL2
PRPF4B
TTK
TENT5A
TENT4A
DAP
KIF20A
NNT
MRPS30
HSPA9
MRPS27
THG1L
CLINT1
CNOT6
MSH3
POLR3G
DROSHA
LMNB1
SUB1
FAM172A
TARS
BRIX1
RAD50
NUP155
NR3C1
RARS
H2AFY
TCERG1
DPYSL3
CSNK1A1
CPEB4
DBN1
ZNF346
SMC4
BCL6
ARL6
KPNA1
XRN1
PRKAR2A
GNAI2
RPL24
FXR1
GBE1
NCBP2
ATP6V1A
MRPL3
HEMK1
RRP9
EIF1B
ZBTB47
NKTR
EIF4G1
EEF1B2
NCL
ACTR3
SF3B6
DNAJC27
GPD2
TANC1
EIF2B4
PPM1G
IFIH1
RPS15
MOGS
SPTBN1
RTN4
MRPL19
WDR75
FN1
STAT1
PAPOLG
CCT4
SF3B1
FHL2
HDLBP
BIRC6
NOL10
CEBPZ
RAB3GAP1
DARS
SRSF7
PNO1
THADA
TIA1
SUMO1
MSH6
FARSB
CACYBP
MRPL37
RPL22
CHD5
PARK7
AMPD2
SRSF4
CAPZA1
SFPQ
ARHGEF2
DOCK7
SWT1
MFN2
SMG7
PLA2G4A
GADD45A
RO60
UCHL5
SRSF11
CD58
TTF2
MAP7D1
WARS2
MRPS15
TSNAX
RPF1
PRPF3
P3H1
EBNA1BP2
IPO13
ERI3
PRDX1
NSUN4
CNN3
PRRC2C
PTBP2
DARS2
UTP25
SYF2
ARID1A
CENPF
CD3EAP
KMT2A
RPS25
KIF14
DDX59
FASTKD2
SPCS2
PHF3
PLAGL1
AKAP7
RPN2
RAB3GAP2
GTF3C3
TJP2
CPSF3
HEATR1
PTBP3
SET
GLE1
RAB14
RBM18
YLPM1
FCF1
SLIRP
RBM25
EIF2B2
NRDE2
TMEM214
FAM98A
IFIT2
SMNDC1
HELLS
GOT1
RCL1
MTHFD1L
PCMT1
MRPS14
TCP1
ENOX1
MTRF1
WBP4
HSPH1
EXOSC8
ETF1
PAIP2
KDM3B
UTP20
TMPO
ARL1
MTERF2
TARDBP
ZNF706
AKAP1
COIL
TRIM25
NCAPH
TMEM131L
TENT4B
PSPC1
TRMT1L
ZCCHC17
KHDRBS1
POLR3GL
PDS5A
ZRANB3
RPL21
RASL11A
FYTTD1
MTERF4
OCRL
MRPS2
COPA
RBBP6
ZC3H7A
ANXA11
ZNF205
RPL5
TRMT13
44446
CBX3
HNRNPA2B1
ARL4A
MRM2
SMU1
ACO1
CALD1
BICC1
P4HA1
RBM19
CIT
DDX54
DDX39A
TRIR
ZC3H13
NLN
TSFM
SPATS2
RAB9B
RAB9A
BAZ2B
EXOSC9
AGO2
ACSL3
NCOA5
VAPB
CHD6
PLCG1
SRSF6
GTSF1L
ZNFX1
CSE1L
RAB22A
STAU1
SNAI1
DDX27
ZBP1
FASTKD3
VAMP7
PAIP2B
SNRNP27
MPHOSPH10
IRGC
USP9X
RRP36
SNRPC
SERPINB6
XPO5
AARS2
RPS10
APOBEC2
GNMT
RREB1
SSR1
RIOK1
RPP40
ATXN1
NUP153
DEK
LRRFIP1
AHNAK
CNOT1
GOT2
PIWIL1
ABCC4
UPF3B
RNF113A
44445
MRPS7
MIF4GD
TTF1
GTF3C4
DDX31
SRMS
POLR1B
GTF2F1
ALKBH7
THOC2
RPL23
SNRPD2
VASP
SYMPK
GZF1
DTD1
SNRPB
RRBP1
SNRPB2
MRPS26
HNRNPR
RALY
EIF2S2
FAM83C
CEP250
AGO3
TUBGCP3
RBM42
PRDX5
PRMT1
SCAF1
SBDS
TRAP1
NSRP1
DNAJC8
ZNF384
EMG1
KTN1
TRMT5
NUP214
HNRNPH2
NXF5
CANX
INTS11
UBR4
HP1BP3
MACF1
SMARCA4
METTL16
PNKD
ECHS1
AKAP9
MTERF1
ZFP36
RASL11B
PAICS
TUBGCP6
DGCR8
YWHAH
APOBEC3A
APOBEC3F
LSM8
CALU
MRPS12
MYO1B
HAT1
HERC2
SNRPN
EIF2AK4
INO80
DUT
MBD4
COPB1
PALLD
FXR2
KIF1C
PUS7L
KRI1
ILF3
NGDN
RAB2B
PARP2
EGLN3
RNASE1
TEP1
RPS4Y1
CRACR2A
GNL3L
GADD45G
XPO7
FAM98C
SAFB2
RPL36
GTPBP3
NSUN5
MRPL34
LSM7
AFDN
ACTN4
FCHO1
MAP1S
LSM4
HELZ2
ATXN10
PAK4
CEP85
ASS1
PRDM12
EXOSC2
PRRC2B
TRIM28
EIF2S3
ZC3H4
LRRC47
ZNF317
PPAN
EIF3G
C19orf66
DNMT1
ZNF426
DKC1
ZNF236
C12orf65
NOL11
UBE4B
HABP4
UBA1
PPIL4
AKAP12
SYNE1
AAR2
RBM39
CAP1
MRPS25
PDLIM4
RPL27
ACLY
NDUFA2
ANKHD1
DIAPH1
EXOC4
PPFIA1
MAP1B
ZCCHC9
TOP2A
KHDRBS3
CHD1L
ZSCAN5A
SNRPA1
LLGL1
LIN28A
LGALS3
DHX30
NUP210
RRP8
PTCD3
IMMT
MRPL35
ILKAP
RAN
CLUH
INPP5K
MYBBP1A
EEFSEC
COQ3
GRSF1
ANKRD17
UTP3
UNK
ZRANB2
EIF5A
RIDA
ERAL1
NIP7
PCNA
NXT1
POLR3F
DAP3
RAB25
IGHMBP2
TOE1
NASP
CTNNBL1
RBM38
AP3B1
XPO4
RNF17
MYH10
MPRIP
SPART
TPT1
RFC3
SRRM1
FAM83F
GIMAP6
GIMAP4
MKRN1
ATP13A3
KRAS
IPO8
LARS
CCDC59
ZFC3H1
EIF2S1
CTIF
MBD2
THUMPD3
ARL8B
PRPF38B
PTGFRN
PPHLN1
ARF3
YWHAQ
KIDINS220
ROCK2
LDHA
CDC73
ERN2
RPS15A
NARS
FBH1
RBM17
RERG
RAB33A
RBMX2
PIWIL4
PUM1
YARS
GNL2
AGO4
BTF3L4
TUT4
PRPF38A
DSG1
DSC1
DHX34
ARGLU1
TPP2
CARS2
STT3A
APC
WDR36
ANXA1
TAOK3
MSI1
OASL
SRPK2
MTO1
SYNCRIP
NAT10
CAPRIN1
CDK4
ESPL1
ZC3H10
HNRNPA1
LTV1
SMPD2
CCT7
MDM2
MPHOSPH6
DYNC1LI2
FHOD1
URB2
NTPCR
RNASEL
DHX9
CEP350
RC3H1
MRPL44
EIF4E2
GCC2
MRPS9
CKAP4
FLNB
RNASEH2B
CKAP2
TBC1D4
LMO7
SETDB2
IGF2BP3
NUPL2
BZW2
TBRG4
DDX56
DBNL
IREB2
NMT1
SRSF1
TACO1
MRPL47
TRA2B
EPRS
SMPD4
WDR33
DNAJC1
CDK9
TXN
ODF2
ECPAS
SMC2
FAM129B
STXBP1
CDK5RAP2
PRPF4
TEX10
MRPL50
NR5A1
NCBP1
ANP32B
RPL35
ENPP2
RANBP6
POLR1E
PLAA
UBAP2
APTX
TLN1
HINT2
RPS6
CMTR1
MDC1
CPEB2
NUMA1
RAB30
NARS2
MRPL15
TGS1
DDX60
BUD13
RDX
PPP2R1B
ALKBH8
SLTM
MAPKBP1
NUSAP1
KIF23
RTF1
PARP6
RPLP1
RSL24D1
GTF2B
IFI44L
RTCA
HADHB
PNPT1
THUMPD2
RAB1A
PREB
LRPPRC
MYOF
KIF11
ARL3
CEP55
DBR1
DNAJC13
ANXA7
ASCC1
RPS24
ATIC
SMARCAL1
METTL5
SSB
PPIG
FASTKD1
OLA1
ITPRID2
USP8
SECISBP2L
PARP16
HERC5
COPS4
HNRNPD
SEC31A
LARP1B
PRDM5
G3BP2
44450
CNOT6L
USO1
ANXA3
CENPE
GSTCD
PAPSS1
SEC24B
YARS2
ETFBKMT
ZCRB1
SCAF11
LLPH
POC1B
SNRPF
TARBP2
NABP2
SMARCC2
C12orf10
ESYT1
HNRNPA1L2
SBNO1
SETD1B
DENR
RBM26
SRRM4
MBNL2
RNF113B
NOVA1
RAB15
WARS
MFAP1
SRP14
ANP32A
ETFA
SCAPER
WDR61
PML
CELF6
FANCI
UNC45A
IQGAP1
EFL1
44451
PARN
FTO
DHX38
ZFHX3
ZCCHC14
ADAD2
RPL3L
RPS2
TCF25
NCOR1
COPS3
MYOCD
UTP4
NOB1
NPEPPS
CLTC
PTRH2
RPRD1A
C18orf21
ASXL3
PELP1
ARHGDIA
EIF4A3
TBCD
RPTOR
CEP131
ELAC1
MBD1
ZCCHC2
BRD4
DUS3L
HUNK
SCYL1
URB1
SAE1
GEMIN7
CARM1
RPS11
RPL13A
NOSIP
PGD
RPL11
ZNF593
SERBP1
RPS8
KIF2C
ALDH9A1
MAEL
MRPL24
ISG20L2
HDGF
SF3B4
ZNF687
TARS2
SETDB1
ANP32E
MRPL9
POGZ
EIF2D
TP53BP2
RAB13
UBAP2L
GATAD2B
ILF2
INTS3
C1orf131
GALNT2
CEP170
ACP1
SRP9
NVL
SDE2
ARF1
CDC42BPA
C1orf35
PARP1
LBR
ARL8A
PDIA6
HNRNPLL
EML4
RPS27A
ASXL2
SNRPG
SNRNP200
MRPS5
DQX1
DUSP11
RABL2A
ZC3H8
AFF3
POLR2D
ZNF385B
HSPD1
DIS3L2
FANCD2
RAB5A
DYNC1LI1
RBMS3
RPL32
PTPRG
SHQ1
LIMD1
RABL3
SRPRB
EIF2A
LPP
DCAF1
MANF
EIF2B5
FIP1L1
LYAR
TRMT10A
PYURF
METTL14
NAF1
RPS3A
RPL37
DDX46
G3BP1
NHP2
FARS2
ZMAT2
ABT1
PPP1R18
PRIM2
RPL7L1
PHIP
RARS2
PNLDC1
ZMYM4
C7orf50
PURB
MDH2
CCT6A
MEPCE
NOM1
NCAPG2
LUC7L2
MSN
ZMYM3
NONO
OGT
NXF3
RADX
RBMX
ZNF185
RPL10
PLPBP
MRPS28
LACTB2
RPL7
MTDH
POLR2K
EIF3H
UTP23
FAM83A
CDKN2A
ZCCHC7
MRRF
SURF2
SURF6
REXO4
RPL7A
CIZ1
SEC16A
PARD3
ZEB1
A1CF
POLR3A
RPP30
FRA10AC1
EIF4EBP2
MKI67
MTG1
PPRC1
PDCD11
TUT1
TNKS1BP1
SSRP1
PTPRJ
CELF1
ENDOD1
SERPINH1
RPS3
ZC3H12C
ATM
AASDHPPT
HYOU1
MTA2
CPSF7
SIDT2
TAGLN
LSM14B
YTHDF1
TRPT1
PLCB3
MRPL49
FAU
ALDOA
HIRIP3
ITGB1
CWC15
SAP18
PDCD4
CCT5
DLAT
PIH1D2
DHX37
UBC
NOCT
DCP1B
TWF1
EIF4E
SRFBP1
UPF2
NCAPD3
QTRT2
KIN
ZNF385D
GUF1
SACS
PABPC3
PARP8
DST
TIAL1
BAG3
RBM46
GPATCH11
GEMIN6
ARL11
ATP5F1A
C18orf25
UHMK1
CWF19L2
BOLL
RPP38
ZFP36L2
MBNL1
DDX4
PELO
SAR1B
IFIT5
HNRNPDL
UTRN
PLOD2
ZIC1
SRP19
CARHSP1
ANAPC1
CAST
CLGN
SMARCA5
HNRNPU
RANBP2
AHCTF1
RBMS1
CFDP1
TRIP12
SREK1
CHD1
MSI2
ENPP3
MIA3
ENAH
BUB3
SRSF12
MRPL39
TSEN2
RAB6B
44453
MMS19
TRMT44
MOV10
SLC16A1
HEATR3
NIFK
LARP1
CNOT8
NUP205
RBM45
TTN
PDIA4
RNF20
PPARGC1B
LSM11
RRAGA
RAB39B
AFF2
N6AMT1
CCT8
SCAF4
TDRD9
MTERF3
RPL30
SUPV3L1
EEF1A1
HK1
PHF6
UTP14A
ATAD2
ZIC3
MALSU1
EIF4A2
BRPF1
RPUSD3
EXOG
SMG1
RBPMS
DDX19B
MYO1E
MRPL17
MRAS
WASF2
TENT5B
CUL4B
HIST1H4H
EIF5B
CNOT11
TSR2
ZC3H18
TAGLN2
DUSP23
NPM2
CCAR2
SYNJ1
MRPL10
GART
SON
CSRP1
IGF2BP1
PSMD4
HK2
CELF3
NAE1
ZYX
ZNF233
ZNF235
CALM3
ATAD3B
SSU72
NDUFV3
CBS
U2AF1
RRP1B
G6PD
CSTB
RRP1
FAM207A
MCM3AP
PCNT
PRMT2
SAFB
CHTOP
ADAR
FDPS
LMNA
CCDC12
GPATCH4
AZGP1
CPSF4
TONSL
RECQL4
SQSTM1
RPL8
PSMC2
CELF5
ABCF3
U2AF1L4
SRSF2
ALDH16A1
DCD
ZNF385A
LSM12
RACGAP1
LARP4
RAVER1
BCL6B
SENP3
EIF4A1
RPL26
POLR3K
FLYWCH2
NXF1
RPL29
RPS6KA4
ELAVL4
MAGOH
PARS2
USP24
NOL9
RAVER2
PEF1
RBBP4
FUBP1
TYW3
C1orf52
ZNF326
HFM1
GFI1
AGL
RBM15
TDRD5
TFB2M
CAPN2
MRPL55
WDR26
ARL5A
NUP35
SMARCAD1
PDLIM5
RPRD2
ERCC3
IWS1
DHX57
S100A9
TDRD10
HELQ
MRPS18C
ATP1A1
EIF4E3
CCT3
NEK10
CIP2A
CWC22
ANKZF1
CLASP2
NUAK2
IFI16
EIF5A2
RPL22L1
RYBP
GTPBP8
NEPRO
WDFY3
THOC7
PSMD6
GMPS
TIPARP
SLMAP
RPL9
RPP14
DNASE1L3
RBM47
U2SURP
TOPBP1
SLC4A1AP
KIF15
WDR43
FYCO1
ZC3H12A
POLR2H
RPN1
RFC4
RPL39L
TKT
GNL3
PBRM1
TASOR
SLBP
AIMP1
METAP1
APEH
HSPA4L
RAD54L2
POC1A
HMGB2
ANXA5
ADAD1
NAA15
ICE1
ABCE1
OTUD4
LSM6
NIPBL
AGGF1
TENT2
UTP15
NSA2
GFM2
TERT
44447
CGAS
TRA2A
RPS14
SLU7
FABP5
DNAAF5
[truncated: 951 more rows]

## Sheet: Supplementary Table S2
Supplementary Table S2. Immune genes were obtained from the Tumor Immune Estimation Resource (TIMER) Database（n=2483）.
immuneGene name
AZGP1
B2M
CALR
CANX
CD1A
CD1B
CD1C
CD1D
CD1E
CD4
CD8A
CD8B
CD74
CREB1
CTSB
CTSE
CTSL
CTSS
FCER1G
FCGRT
PDIA3
HFE
HLA-A
HLA-B
HLA-C
HLA-DMA
HLA-DMB
HLA-DOA
HLA-DOB
HLA-DPA1
HLA-DPB1
HLA-DQA1
HLA-DQA2
HLA-DQB1
HLA-DRA
HLA-DRB1
HLA-DRB3
HLA-DRB4
HLA-DRB5
HLA-E
HLA-F
HLA-G
HLA-H
MR1
HSPA1A
HSPA1B
HSPA1L
HSPA2
HSPA4
HSPA5
HSPA6
HSPA8
HSP90AA1
HSP90AB1
ICAM1
IFNA1
IFNA2
IFNA4
IFNA5
IFNA6
IFNA7
IFNA8
IFNA10
IFNA13
IFNA14
IFNA16
IFNA17
IFNA21
IFNG
KIR2DL1
KIR2DL2
KIR2DL3
KIR2DL4
KIR2DS1
KIR2DS3
KIR2DS4
KIR2DS5
KIR3DL1
KIR3DL2
KLRC1
KLRC2
KLRC3
KLRD1
LTA
CIITA
MICA
MICB
NFYA
NFYB
NFYC
LGMN
PSMB8
PSMC1
PSMC2
PSMC3
PSMC4
PSMC5
PSMC6
PSMD1
PSMD2
PSMD3
PSMD4
PSMD5
PSMD7
PSMD8
PSMD10
PSMD11
PSMD13
PSME1
PSME1
PSME2
PSME2
RELB
RFX5
RFXAP
SLC10A2
TAP1
TAP2
TAPBP
THBS1
SEM1
KLRC4
AP3B1
RFXANK
PSMD6
PSME3
PSMD14
CLEC4M
IFI30
PROCR
ADRM1
ECPAS
TRPC4AP
CD209
UBXN1
ERAP1
TAPBPL
KIR2DL5A
ERAP2
ULBP3
ULBP2
ULBP1
KIR3DL3
RAET1E
RAET1L
UBR1
RAET1G
PDIA2
HAMP
PI3
CAMP
DEFB4A
PPBP
REG3G
CXCL14
CXCL16
SLPI
CXCL8
CXCL10
CXCL9
CXCL5
CXCL11
CXCL6
CXCL1
CXCL12
CXCL13
CXCL2
PF4
XCL1
CXCL3
DEFB103B
CCL13
CCL1
DEFB1
CCL8
ELANE
DEFB103A
DEFA3
DEFA1
TMSB10
DEFA6
DEFA5
DEFA4
LCN2
LCN1
COLEC10
BPI
S100A9
S100A8
DCD
LCN6
S100A12
HTN3
LCN8
DEFA1B
CCR10
CELA1
DEFB106A
PENK
BPIFC
MMP12
BPIFB6
LEAP2
SFTPD
LCN9
BPIFB2
PTGDS
TMSB4X
PGLYRP1
ZC3HAV1
TMSB15A
S100B
S100A13
S100A6
DEFB119
DEFB107A
DEFB105A
SERPIND1
DEFB129
DEFB127
S100P
S100A7
DEFB104A
DEFB126
DEFB106B
DEFB104B
DEFB107B
PGLYRP3
PGLYRP2
S100A10
S100A2
DEFB125
DEFB123
DEFB105B
DEFB132
BPIFB3
LCN12
PGLYRP4
S100A11
S100A5
S100A3
S100A1
DEFB128
DEFB108B
HTN1
LMBR1L
S100A7A
DEFB118
COLEC12
TMSB4Y
DEFB131A
DEFB134
DEFB130A
DEFB124
DEFB121
DEFB116
DEFB115
DEFB114
DEFB113
DEFB112
DEFB110
TMSB15B
DEFB133
S100Z
MAVS
TMSB4XP8
S100A14
LCN10
S100A16
DEFB136
DEFB135
DEFB117
DEFB110
ZC3HAV1L
S100A7L2
MBL3P
DEFB4B
BPIFB4
IFNAR1
AZU1
DEFB131B
DEFA1A3
LCN1P1
S100G
DEFA7P
DEFB130B
DEFB108F
DEFB131C
TCHHL1
TINAGL1
IFNGR1
SLC22A17
WFIKKN1
WFDC2
IL6
UMODL1
TGFB1
PF4V1
MMP9
ANOS1
TLR4
IFNG
SPAG11B
A2M
CTSL
NFKB1
APOBEC3G
FABP6
NOD2
MBL2
SFTPA1
RBP1
TLR2
SLC40A1
PLAU
IL1B
PAEP
HJV
MUC5AC
CTSS
OBP2A
PLTP
MX1
DDX58
IFNL1
IRF3
SFTPA2
LPA
LBP
RBP4
SFTPA1
NOX4
LTF
IFNB1
RBP5
FABP7
FABP5
FABP3
FABP2
FABP4
R3HDML
BPIFA3
BPIFB1
OASL
CRABP2
CRABP1
RBP7
DUOX1
OBP2B
RBP2
LCN15
CETP
FABP12
FABP9
BPIFA1
LCNL1
C8G
SPAG11A
PI15
NOX1
PMP2
APOD
ORM2
ORM1
TNF
CTSG
PRTN3
MAPK1
PML
AEN
CYBB
BPIFA2
ISG20
BCL3
ISG20L2
NOX5
NOX3
DUOX2
TLR3
TFRC
IFIH1
LRP1
TRIM5
IDO1
GDF15
NEDD4
ADIPOQ
STAT3
STAT1
IFNL2
SOCS3
SEMG1
TNFSF10
CCL20
SOCS1
RNASEL
IRF1
IL15
APOBEC3F
PLAAT4
CHIT1
IFNA1
CD40
TLR7
PPIA
HFE
ZYX
NLRX1
PGC
VEGFA
IKBKE
ISG15
DHX58
TNFAIP3
TFR2
FCN2
MUC4
F2R
ELN
IL27
MAPT
LYZ
CCL5
LEP
CYLD
KLKB1
CST4
CSRP1
MAPK14
JUN
ITGAV
IRF5
CCR6
IL12B
TLR8
GNLY
CD81
EIF2AK2
APOM
CACYBP
NOD1
MAPK8
MAPK3
BST2
BPHL
PLA2G2A
GRN
NEWENTRY
PDGFRA
GNAI1
WNT5A
FURIN
ADAR
TYK2
NOS2
TRAF3
TPT1
TPM2
NEO1
AHNAK
TLR1
TK2
PRDX2
MX2
FGF2
FGA
TCF7L2
F2RL1
TKFC
MSR1
NFKBIZ
LMBR1
EPPIN
SRC
MPO
ELAVL1
ROBO3
SP1
SOD1
PDF
DLL4
ECD
SLC11A1
DMBT1
STING1
SKIV2L
SEMG2
LTA
DES
DCK
DAXX
TNFRSF10A
TNFRSF10B
EED
CCL4
LIMS1
LALBA
APOBEC3H
TMPRSS6
SPINK5
MARCO
BECN1
TNFSF11
KNG1
CSK
KLRK1
KCNH2
JUND
JAK1
CREB1
CLDN4
CCL28
RNASE3
RN7SL1
IRF7
IREB2
ILK
IL18
IL17A
LTB4R
APOBEC3A
MASP2
TRIM27
RELA
IL7R
IL1A
PTX3
IFNAR2
IFN1@
SYTL1
APOBEC3C
DDX17
PTGS2
HTR1A
SEPTIN7
CD40LG
CD14
CD8A
CD4
MASP1
PROC
MAP2K2
MAP2K1
HRG
NDRG1
IRF9
TRIM22
LANCL1
PPP4C
HMOX1
HMGB1
HLA-B
RNASE7
ABCC4
HGF
HDAC1
IFNLR1
PLSCR1
B2M
BACH2
TANK
PIK3CG
ARRB1
RSAD2
STAB2
TBK1
PDYN
PDGFRB
PDCD1
PCSK2
PCSK1
ARG2
AQP9
FASLG
APOH
BIRC5
ANXA6
IL22
VTN
VIM
VCAM1
PRDX1
GFAP
GBP2
ALB
SLC29A3
OAS1
AGER
UNC93B1
TNFSF4
NOS1
ACTG1
ACTA1
ACO1
SERPINA3
CXCR1
CCL15
CCL14
CCL4
CCL16
CCL19
CCL13
CCL18
CCL17
CCL26
CCL22
CCR3
CCL28
CCL4L1
ACKR2
CCR7
CCL27
CCR8
ACKR4
CCR10
CCL2
CCL21
CCL7
CCL5
CCL3
CCL20
CCL11
CCR5
CCL23
CCL25
CCL1
CCL3L3
CCL4L2
CXCL12
XCL1
CCL8
CCL3L1
CCR1
CCL24
XCL2
CXCL1
CXCL10
CXCR4
CXCL2
CXCR6
CCR4
CXCL11
TAFA5
TAFA3
TAFA4
TAFA1
TAFA2
CCL15-CCL14
IL6
TNF
IL1B
IL18
PTK2B
VEGFA
IL4
CDH1
CD40
DEFB103B
F2RL1
MMP9
LTBP1
DEFB4A
TNFSF10
IL13
IL10
IL2
PPARG
FGR
MIF
CRP
JAK2
IL1A
PTK2
PTGDR
CD86
HCK
ARRB1
GNAI1
VDR
OLR1
GRK2
TXK
RNASE2
CD79A
CD79B
LYN
SYK
BTK
BLNK
VAV3
VAV1
VAV2
RAC1
RAC2
RAC3
PPP3CA
PPP3CB
PPP3CC
CHP1
PPP3R1
PPP3R2
CHP2
NFAT5
NFATC1
NFATC2
NFATC3
NFATC4
HRAS
KRAS
NRAS
FOS
JUN
CARD11
BCL10
MALT1
CHUK
IKBKB
IKBKG
NFKB1
RELA
NFKBIA
NFKBIB
NFKBIE
CD81
CD19
CR2
PIK3R5
PIK3R1
PIK3R2
PIK3R3
PIK3CA
PIK3CB
PIK3CD
PIK3CG
AKT3
AKT1
AKT2
GSK3B
INPP5D
CD22
CD72
PTPN6
LILRB3
FCGR2B
RASGRP3
PLCG2
PRKCB
IFITM1
IGH
IGHA1
IGHA2
IGHD
IGHD1-1
IGHD1-14
IGHD1-20
IGHD1-26
IGHD1-7
IGHD2-15
IGHD2-2
IGHD2-21
IGHD2-8
IGHD3-10
IGHD3-16
IGHD3-22
IGHD3-3
IGHD3-9
IGHD4-11
IGHD4-17
IGHD4-23
IGHD4-4
IGHD5-12
IGHD5-18
IGHD5-24
IGHD5-5
IGHD6-13
IGHD6-19
IGHD6-25
IGHD6-6
IGHD7-27
IGHE
IGHG1
IGHG2
IGHG3
IGHG4
IGHJ1
IGHJ2
IGHJ3
IGHJ4
IGHJ5
IGHJ6
IGHM
IGH
IGHV1-18
IGHV1-2
IGHV1-24
IGHV1-3
IGHV1-45
IGHV1-46
IGHV1-58
IGHV1-69
IGHV1-8
IGHV1-38-4
IGHV1-69-2
IGHV2-26
IGHV2-5
IGHV2-70
IGHV3-11
IGHV3-13
IGHV3-15
IGHV3-16
IGHV3-20
IGHV3-21
IGHV3-23
IGHV3-30
IGHV3-30-3
IGHV3-30-5
IGHV3-33
IGHV3-35
IGHV3-38
IGHV3-43
IGHV3-48
IGHV3-49
IGHV3-53
IGHV3-64
IGHV3-66
IGHV3-7
IGHV3-72
IGHV3-73
IGHV3-74
IGHV3-9
IGHV3-38-3
IGHV3-69-1
IGHV4-28
IGHV4-30-1
IGHV4-30-2
IGHV4-30-4
IGHV4-31
IGHV4-34
IGHV4-39
IGHV4-4
IGHV4-59
IGHV4-61
IGHV4-38-2
IGHV5-51
IGHV5-10-1
IGHV6-1
IGHV7-4-1
IGHV7-81
IGK
IGKC
IGKDEL
IGKJ
IGKJ1
IGKJ2
IGKJ3
IGKJ4
IGKJ5
IGKV@
IGKV1-12
IGKV1-13
IGKV1-16
IGKV1-17
IGKV1-27
IGKV1-33
IGKV1-37
IGKV1-39
IGKV1-5
IGKV1-6
IGKV1-8
IGKV1-9
IGKV1D-12
IGKV1D-13
IGKV1D-16
IGKV1D-17
IGKV1D-33
IGKV1D-37
IGKV1D-39
IGKV1D-42
IGKV1D-43
IGKV1D-8
IGKV2-24
IGKV2-28
IGKV2-30
IGKV2-40
IGKV2D-24
IGKV2D-28
IGKV2D-29
IGKV2D-30
IGKV2D-40
IGKV3-11
IGKV3-15
IGKV3-20
IGKV3-7
IGKV3D-11
IGKV3D-15
IGKV3D-20
IGKV3D-7
IGKV4-1
IGKV5-2
IGKV6-21
IGKV6D-21
IGKV6D-41
IGL
IGLC1
IGLC2
IGLC3
IGLC6
IGLC7
IGLJ
IGLJ1
IGLJ2
IGLJ3
IGLJ4
IGLJ5
IGLJ6
IGLJ7
IGLV@
IGLV1-36
IGLV1-40
IGLV1-44
IGLV1-47
IGLV1-50
IGLV1-51
IGLV10-54
IGLV11-55
IGLV2-11
IGLV2-14
IGLV2-18
IGLV2-23
IGLV2-33
IGLV2-8
IGLV3-1
IGLV3-10
IGLV3-12
IGLV3-16
IGLV3-19
IGLV3-21
IGLV3-22
IGLV3-25
IGLV3-27
IGLV3-32
IGLV3-9
IGLV4-3
IGLV4-60
IGLV4-69
IGLV5-37
IGLV5-39
IGLV5-45
IGLV5-48
IGLV5-52
IGLV6-57
IGLV7-43
IGLV7-46
IGLV8-61
IGLV9-49
C3
C5
CAMP
CCL1
CCL11
CCL13
CCL14
CCL15-CCL14
CCL15
CCL16
CCL17
CCL18
CCL19
CCL2
CCL20
CCL21
CCL22
CCL23
CCL24
CCL25
CCL26
CCL27
CCL28
CCL3
CCL3L1
CCL3P1
CCL3L3
CCL4
CCL4L2
CCL4L1
CCL5
CCL7
CCL8
CKLF
CMA1
CTSG
CX3CL1
CXCL1
CXCL10
CXCL11
CXCL12
CXCL13
CXCL14
CXCL16
CXCL17
CXCL2
CXCL3
CXCL5
CXCL6
CXCL9
CCN1
DEFA1
DEFA3
DEFA5
DEFB1
DEFB103B
DEFB104A
DEFB4A
EDN1
EDN2
EDN3
FGF10
FGF2
HTN3
CXCL8
LECT2
PF4
PF4V1
PLAU
PPBP
PPBPP1
PROK2
RNASE2
SAA1
SAA2
SBDS
SEMA3A
SEMA3B
SEMA3C
SEMA3D
SEMA3E
SEMA3F
SEMA3G
SEMA4A
SEMA4B
SEMA4C
SEMA4D
SEMA4F
SEMA4G
SEMA5A
SEMA5B
SEMA6A
SEMA6B
SEMA6C
SEMA6D
SEMA7A
SLIT1
SLIT2
TNC
TYMP
XCL1
XCL2
C5AR1
ACKR2
CCR1
CCR10
CCR3
CCR4
CCR5
CCR6
CCR7
CCR8
CCR9
ACKR4
CCRL2
CMKLR1
CX3CR1
CXCR3
CXCR4
CXCR5
CXCR6
ACKR3
CYSLTR1
CYSLTR2
ACKR1
EDNRA
EDNRB
FPR1
FPR2
FPR2
GPR17
GPR32
GPR33
PTGDR2
C5AR2
CXCR1
CXCR2
LTB4R
LTB4R2
PLAUR
PLXNA1
PLXNA2
PLXNA3
PLXNA4
PLXNB1
PLXNB2
PLXNB3
PLXNC1
PLXND1
PTAFR
ROBO1
ROBO2
ROBO3
RXFP3
XCR1
ADIPOQ
ADM
ADM2
AGRP
AGT
AMBN
AMELX
AMH
ANGPTL5
ANGPTL7
APLN
AREG
MANF
CDNF
ARTN
AVP
AZU1
BDNF
BMP1
BMP10
BMP15
BMP2
BMP3
BMP4
BMP5
BMP6
BMP7
BMP8A
BMP8B
BTC
MYDGF
C3
C5
CALCA
CALCB
CAMP
CAT
CCK
CCL1
CCL11
CCL13
CCL14
CCL15-CCL14
CCL15
CCL16
CCL17
CCL18
CCL19
CCL2
CCL20
CCL21
CCL22
CCL23
CCL24
CCL25
CCL26
CCL27
CCL28
CCL3
CCL3L1
CCL3P1
CCL3L3
CCL4
CCL4L2
CCL4L1
CCL5
CCL7
CCL8
CD320
CD40LG
CD70
ADA2
CER1
CGA
CGB3
CGB1
CGB2
CGB5
CGB7
CGB8
CHGA
CHGB
CKLF
CLCF1
CLEC11A
CMA1
CMTM1
CMTM2
CMTM3
CMTM4
CMTM5
CMTM6
CMTM7
CMTM8
CNTF
CORT
CRH
CSF1
CSF2
CSF3
CSH1
CSH2
CSHL1
CSPG5
CTF1
CCN2
CTSG
CX3CL1
CXCL1
CXCL10
CXCL11
CXCL12
CXCL13
CXCL14
CXCL16
CXCL17
CXCL2
CXCL3
CXCL5
CXCL6
CXCL9
CCN1
DEFA1
DEFA3
DEFA5
DEFB1
DEFB103B
DEFB104A
DEFB4A
DKK1
EBI3
EDN1
EDN2
EDN3
EGF
EPGN
EPO
EREG
ESM1
FAM3B
FAM3C
FAM3D
FASLG
FGF1
FGF10
FGF11
FGF12
FGF13
FGF14
FGF16
FGF17
FGF18
FGF19
FGF2
FGF20
FGF21
FGF22
FGF23
FGF3
FGF4
FGF5
FGF6
FGF7
FGF8
FGF9
VEGFD
FIGNL2
FLT3LG
FSHB
GAL
GALP
GAST
GCG
GDF1
GDF10
GDF11
GDF15
GDF2
GDF3
GDF5
GDF6
GDF7
GDF9
GDNF
GH1
GH2
GHRH
GHRL
GIP
GKN1
GMFB
GMFG
GNRH1
GNRH2
GPHA2
GPHB5
GPI
GREM1
GREM2
GRN
GRP
GUCA2A
HAMP
HBEGF
HDGF
HDGFL3
HGF
HTN3
IAPP
IFNA1
IFNA10
IFNA13
IFNA14
IFNA16
IFNA17
IFNA2
IFNA21
IFNA4
IFNA5
IFNA6
IFNA7
IFNA8
IFNB1
IFNE
IFNG
IFNK
IFNW1
IGF1
IGF2
IL10
IL11
IL12A
IL12B
IL13
IL15
IL16
IL17A
IL17B
IL17C
IL17D
IL17F
IL18
IL19
IL1A
IL1B
IL1F10
IL36RN
IL36A
IL37
IL36B
IL36G
IL1RN
IL2
IL20
IL21
IL22
IL23A
IL24
IL25
IL26
IL27
IFNL2
IFNL3
IFNL1
IL3
IL31
IL32
IL33
IL34
IL4
IL5
IL6
IL6ST
IL7
CXCL8
IL9
INHA
INHBA
INHBB
INHBC
INHBE
INS
INS-IGF2
INSL3
INSL4
INSL5
INSL6
JAG1
JAG2
FGF7P6
FGF7P3
KITLG
KL
LACRT
LECT2
LEFTY1
LEFTY2
LEP
LHB
LIF
LRSAM1
LTA
LTB
LTBP1
LTBP2
LTBP3
LTBP4
MDK
MIA
MIF
MLN
MSTN
NAMPT
NDP
NENF
NGF
NMB
NODAL
CCN3
NPFF
NPPA
NPPB
NPPC
NPY
NRG1
NRG2
NRG3
NRG4
NRTN
NTF3
NTF4
NTS
NUDT6
OGN
OSGIN1
OSM
OSTN
OXT
ENDOU
PDGFA
PDGFB
PDGFC
PDGFD
PDGFRA
PDGFRB
PDGFRL
PDYN
PENK
PF4
PF4V1
PGF
PLAU
PMCH
PNOC
POMC
PPBP
PPBPP1
PPBPP2
PPY
PRL
PRLH
PROK1
PROK2
PSPN
PTH
PTH2
PTHLH
PTN
PYY
QRFP
RABEP1
RABEP2
REG1A
RETN
RETNLB
RLN1
RLN2
RLN3
RNASE2
S100A6
SAA1
SAA2
SBDS
SCG2
SCGB3A1
SCT
AIMP1
SECTM1
SEMA3A
SEMA3B
SEMA3C
SEMA3D
SEMA3E
SEMA3F
SEMA3G
SEMA4A
SEMA4B
SEMA4C
SEMA4D
SEMA4F
SEMA4G
SEMA5A
SEMA5B
SEMA6A
SEMA6B
SEMA6C
SEMA6D
SEMA7A
SLIT1
SLIT2
SLURP1
SPP1
SST
STC1
STC2
TAC1
TDGF1
TDGF1P3
TG
TGFA
TGFB1
TGFB2
TGFB3
THPO
TNC
TNF
TNFRSF11B
TNFSF10
TNFSF11
TNFSF12
TNFSF13
TNFSF13B
TNFSF14
TNFSF15
TNFSF18
TNFSF4
TNFSF8
TNFSF9
TOR2A
TRH
TSHB
TSLP
TXLNA
TYMP
UCN
UCN2
UCN3
UTS2
UTS2B
VEGFA
VEGFB
VEGFC
VGF
VIP
XCL1
XCL2
ACVR1B
ACVR1C
ACVR2A
ACVR2B
ACVRL1
ADCYAP1R1
ADIPOR1
ADIPOR2
ADRB1
ADRB2
AGTR1
AGTR2
AMHR2
ANGPT1
ANGPT4
ANGPTL1
ANGPTL2
ANGPTL3
ANGPTL4
ANGPTL6
APLNR
AR
AVPR1A
AVPR1B
AVPR2
BMPR1A
BMPR1B
BMPR2
BRD8
C3AR1
C5AR1
CALCR
CALCRL
ACKR2
CCR1
CCR10
CCR3
CCR4
CCR5
CCR6
CCR7
CCR8
CCR9
ACKR4
CCRL2
CD40
CMKLR1
CNTFR
CRHR1
CRHR2
CRIM1
CRLF1
CRLF2
CRLF3
CSF1R
CSF2RA
CSF2RB
CSF3R
CX3CR1
CXCR3
CXCR4
CXCR5
CXCR6
ACKR3
CYSLTR1
CYSLTR2
ACKR1
EDNRA
EDNRB
EGFR
ENG
EPOR
ESR1
ESR2
ESRRA
ESRRB
ESRRG
FGFR1
FGFR2
FGFR3
FGFR4
FGFRL1
FLT1
FLT3
FLT4
FPR1
FPR2
FPR2
FSHR
GALR2
GALR3
GCGR
GHR
GHRHR
GHSR
GIPR
GLP1R
GLP2R
GNRHR
GPER1
GPR17
GPR32
GPR33
PTGDR2
C5AR2
HNF4A
HNF4G
HTR3A
HTR3B
HTR3C
HTR3D
HTR3E
IFNAR1
IFNAR2
IFNGR1
IFNGR2
IGF1R
IGF2R
IL10RA
IL10RB
IL11RA
IL12RB1
IL12RB2
IL13RA1
IL13RA2
IL15RA
IL2RB
IL17RA
IL17RB
IL17RC
IL17RD
IL17RE
IL18R1
IL18RAP
IL1R1
IL1R2
IL1RAP
IL1RL1
IL1RL2
IL20RA
IL20RB
IL21R
IL22RA1
IL22RA2
IL23R
IL27RA
IFNLR1
IL2RA
IL2RB
IL2RG
IL31RA
IL3RA
IL4R
IL5RA
IL6R
IL7R
CXCR1
CXCR2
IL9R
INSR
KDR
LEPR
LGR4
LGR5
LGR6
LHCGR
LIFR
LTB4R
LTB4R2
LTBR
MC1R
MC2R
MC3R
MC4R
MCHR1
MCHR2
MET
MLNR
MPL
MTNR1A
MTNR1B
NGFR
NMBR
NPR1
NPR3
NR0B1
NR0B2
NR1D1
NR1D2
NR1H2
NR1H3
NR1H4
NR1I2
NR1I3
NR2C1
NR2C2
NR2E1
NR2E3
NR2F1
NR2F2
NR2F6
NR3C1
NR3C2
NR4A1
NR4A2
NR4A3
NR5A1
NR5A2
NR6A1
NRP1
NRP2
OGFR
OPRD1
OPRK1
OPRL1
OPRM1
OSMR
OXTR
PGR
PGRMC2
PLAUR
PLXNA1
PLXNA2
PLXNA3
PLXNA4
PLXNB1
PLXNB2
PLXNB3
PLXNC1
PLXND1
PPARA
PPARD
PPARG
PRLHR
PRLR
PTAFR
PTGDR
PTGDS
PTGER1
PTGER2
PTGER3
PTGER4
PTGFR
PTH1R
PTH2R
RARA
RARB
RARG
ROBO1
ROBO2
ROBO3
RORA
RORB
RORC
RXFP1
RXFP2
RXFP3
RXRA
RXRB
RXRG
S1PR1
S1PR2
SCTR
SDC1
SDC2
SDC3
SDC4
SORT1
SSTR1
SSTR2
SSTR5
ST2
TACR1
TEK
TGFBR1
TGFBR2
TGFBR3
THRA
THRB
TIE1
TNFRSF10A
TNFRSF10B
TNFRSF10C
TNFRSF10D
TNFRSF11A
TNFRSF12A
TNFRSF13B
TNFRSF13C
TNFRSF14
TNFRSF17
TNFRSF18
TNFRSF19
TNFRSF1A
TNFRSF1B
TNFRSF21
TNFRSF25
TNFRSF4
TNFRSF6B
TNFRSF8
TNFRSF9
TRHR
TSHR
TUBB3
VDR
VIPR1
VIPR2
XCR1
IFNA10
IFNA13
IFNA14
IFNA16
IFNA17
IFNA2
IFNA21
IFNA4
IFNA5
IFNA6
IFNA7
IFNA8
IFNB1
IFNE
IFNG
IFNK
IFNW1
IFNAR2
IFNGR1
IFNGR2
IL11
IL12A
IL12B
IL13
IL15
IL16
IL17A
IL17B
IL17C
IL17D
IL17F
IL18
IL19
IL1A
IL1B
IL1F10
IL36RN
IL36A
IL37
IL36B
IL36G
IL1RN
IL2
IL20
IL21
IL22
IL23A
IL24
IL25
IL26
IL27
IFNL2
IFNL3
IFNL1
IL3
IL31
IL32
IL33
IL34
IL4
IL5
IL6
IL6ST
IL7
CXCL8
IL9
TXLNA
IL10RA
IL10RB
IL11RA
IL12RB1
IL12RB2
IL13RA1
IL13RA2
IL15RA
IL2RB
IL17RA
IL17RB
IL17RC
IL17RD
IL17RE
IL18R1
IL18RAP
IL1R1
IL1R2
IL1RAP
IL1RL1
IL1RL2
IL20RA
IL20RB
IL21R
IL22RA1
IL22RA2
IL23R
IL27RA
IFNLR1
IL2RA
IL2RB
IL2RG
IL31RA
IL3RA
IL4R
IL5RA
IL6R
IL7R
CXCR1
CXCR2
IL9R
ST2
HLA-A
HLA-B
HLA-C
HLA-E
HLA-G
KIR3DL1
KIR3DL2
KIR2DL1
KIR2DL2
KIR2DL3
KIR2DL4
KIR2DL5A
KLRC1
KLRC2
KLRC3
KLRD1
[truncated: 485 more rows]

## Sheet: Supplementary Table S3
Supplementary Table S3. Immune-related RBP (n=1120) and immune genes（n=565）(Correlation coefficient >0.5, P<0.001).
immuneGene	RDP	cor	pvalue	Regulation
AGER	AAAS	0.56422	6.47e-35	postive
AMH	AAAS	0.533467	1e-30	postive
DAXX	AAAS	0.509453	9.73e-28	postive
LMBR1L	AAAS	0.696322	3.76e-59	postive
NR2C1	AAAS	0.526749	7.27e-30	postive
PSMD3	AAAS	0.548477	1.02e-32	postive
RAF1	AAAS	0.523999	1.61e-29	postive
TOR2A	AAAS	0.570299	8.51e-36	postive
TRIM27	AAAS	0.539157	1.81e-31	postive
PSMD3	AAR2	0.53639	4.19e-31	postive
PSME3	AAR2	0.514977	2.1e-28	postive
TRPC4AP	AAR2	0.694733	8.81e-59	postive
PSMC5	AATF	0.533524	9.88e-31	postive
RAC3	AATF	0.532651	1.28e-30	postive
UBXN1	AATF	0.557851	5.19e-34	postive
ABCC4	ABCC4	1	0	postive
BIRC5	ABT1	0.609014	7.28e-42	postive
CDC42	ABT1	0.537274	3.21e-31	postive
CKLF	ABT1	0.594551	1.68e-39	postive
CMTM4	ABT1	-0.555695	1.04e-33	negative
CYLD	ABT1	-0.528935	3.84e-30	negative
DAXX	ABT1	0.555746	1.02e-33	postive
MIF	ABT1	0.602752	7.94e-41	postive
MYDGF	ABT1	0.635374	1.69e-46	postive
NR3C2	ABT1	-0.504913	3.36e-27	negative
PPIA	ABT1	0.59215	4.04e-39	postive
PPP4C	ABT1	0.719615	7.19e-65	postive
PRDX2	ABT1	0.541157	9.87e-32	postive
PSMC4	ABT1	0.545699	2.44e-32	postive
PSMC6	ABT1	0.60974	5.5e-42	postive
PSMD13	ABT1	0.644279	3.61e-48	postive
PSMD14	ABT1	0.61346	1.29e-42	postive
PSMD3	ABT1	0.510171	7.98e-28	postive
PSMD8	ABT1	0.661861	1.24e-51	postive
PSME1	ABT1	0.523077	2.1e-29	postive
PTPN11	ABT1	-0.500072	1.23e-26	negative
TK2	ABT1	-0.548065	1.17e-32	negative
TMSB10	ABT1	0.580332	2.72e-37	postive
TMSB4X	ABT1	0.515544	1.79e-28	postive
TPT1	ABT1	0.546596	1.84e-32	postive
CMTM1	ACLY	0.525886	9.34e-30	postive
ELAVL1	ACLY	0.524617	1.35e-29	postive
PSMD11	ACLY	0.587106	2.49e-38	postive
PSME3	ACLY	0.605633	2.66e-41	postive
ACO1	ACO1	1	0	postive
CALR	ACO2	-0.510379	7.53e-28	negative
CKLF	ACO2	-0.569853	9.89e-36	negative
CMTM3	ACO2	-0.550188	5.99e-33	negative
HDAC1	ACO2	-0.512529	4.16e-28	negative
IFNGR2	ACO2	-0.530337	2.54e-30	negative
IL10RB	ACO2	-0.558135	4.73e-34	negative
MANF	ACO2	-0.507801	1.53e-27	negative
MAPK1	ACO2	0.572831	3.61e-36	postive
MAPT	ACO2	0.592567	3.47e-39	postive
MYDGF	ACO2	-0.523767	1.73e-29	negative
NRG3	ACO2	0.510638	7.02e-28	postive
PIK3CB	ACO2	0.51376	2.95e-28	postive
PPARA	ACO2	0.569328	1.18e-35	postive
PPP4C	ACO2	-0.564057	6.83e-35	negative
SEM1	ACO2	-0.512499	4.19e-28	negative
TMSB10	ACO2	-0.525946	9.18e-30	negative
BRAF	ADARB1	0.525164	1.15e-29	postive
CCK	ADARB1	0.536946	3.54e-31	postive
CHGA	ADARB1	0.508757	1.18e-27	postive
CRHR1	ADARB1	0.539793	1.5e-31	postive
FGF13	ADARB1	0.532717	1.26e-30	postive
GREM2	ADARB1	0.616022	4.7e-43	postive
MAP2K1	ADARB1	0.552036	3.34e-33	postive
OPRL1	ADARB1	0.562038	1.33e-34	postive
PAK1	ADARB1	0.586008	3.68e-38	postive
PAK3	ADARB1	0.574674	1.92e-36	postive
PPP3CA	ADARB1	0.61183	2.44e-42	postive
PPP3CB	ADARB1	0.640083	2.25e-47	postive
PPP3R1	ADARB1	0.586029	3.65e-38	postive
PRKCB	ADARB1	0.644188	3.76e-48	postive
PRKCG	ADARB1	0.597265	6.18e-40	postive
PTK2B	ADARB1	0.508021	1.44e-27	postive
RBP4	ADARB1	0.538109	2.49e-31	postive
THRB	ADARB1	0.587331	2.3e-38	postive
VIP	ADARB1	0.630947	1.09e-45	postive
VIPR1	ADARB1	0.58408	7.29e-38	postive
ADIPOR2	ADARB2	0.522223	2.69e-29	postive
ARRB1	ADARB2	0.584803	5.65e-38	postive
BCL10	ADARB2	-0.55117	4.39e-33	negative
CD22	ADARB2	0.521785	3.05e-29	postive
CDC42	ADARB2	-0.509878	8.65e-28	negative
CHGB	ADARB2	0.505123	3.17e-27	postive
CMTM4	ADARB2	0.509286	1.02e-27	postive
CMTM5	ADARB2	0.505732	2.69e-27	postive
CMTM6	ADARB2	-0.508896	1.13e-27	negative
GNAI1	ADARB2	0.513086	3.56e-28	postive
HDAC1	ADARB2	-0.53391	8.8e-31	negative
IFNGR2	ADARB2	-0.53418	8.12e-31	negative
LANCL1	ADARB2	0.581494	1.81e-37	postive
NRAS	ADARB2	-0.550761	5e-33	negative
NRG3	ADARB2	0.526784	7.19e-30	postive
PPP4C	ADARB2	-0.510204	7.91e-28	negative
PRKCQ	ADARB2	0.501246	9.02e-27	postive
PRLHR	ADARB2	0.563483	8.26e-35	postive
PTGDS	ADARB2	0.507597	1.62e-27	postive
SEMA4D	ADARB2	0.5286	4.23e-30	postive
SLC22A17	ADARB2	0.532642	1.28e-30	postive
THRA	ADARB2	0.520093	4.95e-29	postive
TXLNA	ADARB2	-0.515484	1.82e-28	negative
VIM	ADARB2	-0.519571	5.74e-29	negative
NFATC3	ADAT1	0.600791	1.66e-40	postive
BIRC5	ADSL	0.649145	4.19e-49	postive
CDC42	ADSL	0.596442	8.38e-40	postive
CKLF	ADSL	0.589047	1.24e-38	postive
CMTM4	ADSL	-0.524407	1.43e-29	negative
CYLD	ADSL	-0.524661	1.33e-29	negative
IFNGR2	ADSL	0.543641	4.61e-32	postive
MANF	ADSL	0.504366	3.9e-27	postive
MIF	ADSL	0.683504	3.11e-56	postive
MYDGF	ADSL	0.630641	1.24e-45	postive
PPIA	ADSL	0.64555	2.07e-48	postive
PPP4C	ADSL	0.629301	2.16e-45	postive
PRDX2	ADSL	0.571561	5.55e-36	postive
PSMB8	ADSL	0.529861	2.92e-30	postive
PSMC1	ADSL	0.506931	1.94e-27	postive
PSMC4	ADSL	0.562984	9.73e-35	postive
PSMC6	ADSL	0.651456	1.48e-49	postive
PSMD13	ADSL	0.627969	3.75e-45	postive
PSMD14	ADSL	0.645397	2.21e-48	postive
PSMD8	ADSL	0.720597	4.01e-65	postive
PSME1	ADSL	0.507541	1.64e-27	postive
RHOA	ADSL	0.507022	1.89e-27	postive
TK2	ADSL	-0.525886	9.34e-30	negative
TMSB10	ADSL	0.58467	5.92e-38	postive
TMSB4X	ADSL	0.538829	2e-31	postive
TPT1	ADSL	0.555137	1.24e-33	postive
AKT3	ADSS	0.662055	1.13e-51	postive
AEN	AEN	1	0	postive
TNFRSF10B	AEN	0.673135	5.57e-54	postive
ZYX	AEN	0.539185	1.8e-31	postive
ACVR2B	AFF2	0.531952	1.58e-30	postive
BMPR2	AFF2	0.540162	1.34e-31	postive
FGF12	AFF2	0.507397	1.71e-27	postive
FGF13	AFF2	0.555488	1.11e-33	postive
GSK3B	AFF2	0.507671	1.59e-27	postive
MAPK8	AFF2	0.596303	8.82e-40	postive
MAPT	AFF2	0.614968	7.13e-43	postive
PAK3	AFF2	0.571706	5.29e-36	postive
PAK5	AFF2	0.507866	1.5e-27	postive
PIK3R1	AFF2	0.59549	1.19e-39	postive
SEMA4G	AFF2	0.522272	2.65e-29	postive
TNFRSF1A	AFF2	-0.508425	1.29e-27	negative
BIRC5	AHCY	0.613286	1.38e-42	postive
CALR	AHCY	0.594585	1.66e-39	postive
CD320	AHCY	0.621809	4.65e-44	postive
CDC42	AHCY	0.592898	3.07e-39	postive
CKLF	AHCY	0.636994	8.47e-47	postive
CMTM4	AHCY	-0.518752	7.24e-29	negative
CYLD	AHCY	-0.535085	6.2e-31	negative
FABP7	AHCY	0.576436	1.05e-36	postive
IFNGR2	AHCY	0.571157	6.37e-36	postive
MANF	AHCY	0.516269	1.46e-28	postive
MIF	AHCY	0.632469	5.76e-46	postive
MYDGF	AHCY	0.709037	3.34e-62	postive
NENF	AHCY	0.500669	1.05e-26	postive
NRG3	AHCY	-0.53356	9.77e-31	negative
PPARA	AHCY	-0.519683	5.56e-29	negative
PPIA	AHCY	0.721728	2.04e-65	postive
PPP4C	AHCY	0.699365	7.23e-60	postive
PRDX2	AHCY	0.644399	3.43e-48	postive
PSMB8	AHCY	0.56234	1.2e-34	postive
PSMC1	AHCY	0.562159	1.28e-34	postive
PSMC2	AHCY	0.53299	1.16e-30	postive
PSMC3	AHCY	0.546691	1.79e-32	postive
PSMC4	AHCY	0.643081	6.11e-48	postive
PSMC6	AHCY	0.63474	2.21e-46	postive
PSMD13	AHCY	0.659738	3.34e-51	postive
PSMD14	AHCY	0.692108	3.56e-58	postive
PSMD8	AHCY	0.798068	2.3e-89	postive
PSME1	AHCY	0.553787	1.91e-33	postive
RABEP1	AHCY	-0.51923	6.32e-29	negative
S100A16	AHCY	0.514633	2.31e-28	postive
TMSB10	AHCY	0.59672	7.56e-40	postive
TMSB4X	AHCY	0.560003	2.58e-34	postive
TPT1	AHCY	0.517176	1.13e-28	postive
TRPC4AP	AHCY	0.599842	2.37e-40	postive
COLEC12	AHNAK2	0.597659	5.34e-40	postive
AIMP1	AIMP1	1	0	postive
NCK1	AIMP1	0.553204	2.3e-33	postive
PGRMC2	AIMP1	0.543495	4.82e-32	postive
PSMD14	AIMP2	0.50831	1.33e-27	postive
CBL	AKAP13	0.539011	1.9e-31	postive
IREB2	AKAP13	0.539908	1.44e-31	postive
NFAT5	AKAP13	0.52381	1.7e-29	postive
PSMD13	AKAP13	-0.511051	6.26e-28	negative
SOS1	AKAP13	0.527078	6.6e-30	postive
SP1	AKAP13	0.623691	2.17e-44	postive
UBR1	AKAP13	0.563605	7.93e-35	postive
GDNF	ALDH18A1	0.508722	1.19e-27	postive
TRIM27	ALDH18A1	0.514153	2.64e-28	postive
ADM	ALDOA	0.552975	2.48e-33	postive
GPI	ALDOA	0.552902	2.54e-33	postive
PSMC1	ALKBH1	0.573771	2.62e-36	postive
PSMC6	ALKBH1	0.672156	8.99e-54	postive
CYLD	ALKBH2	-0.585756	4.03e-38	negative
PRDX2	ALKBH2	0.540906	1.07e-31	postive
PSMD13	ALKBH2	0.528345	4.56e-30	postive
PSMD4	ALKBH2	0.550445	5.52e-33	postive
RAC3	ALKBH2	0.54313	5.39e-32	postive
BECN1	ALKBH7	-0.526263	8.37e-30	negative
BRAF	ALKBH7	-0.541348	9.31e-32	negative
CBL	ALKBH7	-0.5437	4.52e-32	negative
CD320	ALKBH7	0.724405	4.06e-66	postive
CKLF	ALKBH7	0.526848	7.06e-30	postive
CYLD	ALKBH7	-0.516641	1.31e-28	negative
MAP2K2	ALKBH7	0.615744	5.25e-43	postive
MIF	ALKBH7	0.607736	1.19e-41	postive
MYDGF	ALKBH7	0.628402	3.14e-45	postive
NENF	ALKBH7	0.748841	6.35e-73	postive
NFAT5	ALKBH7	-0.5634	8.49e-35	negative
NR2C2	ALKBH7	-0.577527	7.21e-37	negative
PPP4C	ALKBH7	0.641315	1.32e-47	postive
PRDX2	ALKBH7	0.713629	2.4e-63	postive
PSMC3	ALKBH7	0.603274	6.52e-41	postive
PSMD13	ALKBH7	0.670408	2.1e-53	postive
PSMD4	ALKBH7	0.602982	7.28e-41	postive
PSMD8	ALKBH7	0.610355	4.33e-42	postive
PSME1	ALKBH7	0.554876	1.35e-33	postive
RFXANK	ALKBH7	0.712209	5.45e-63	postive
SOS1	ALKBH7	-0.519337	6.13e-29	negative
TMSB10	ALKBH7	0.535925	4.82e-31	postive
UBR1	ALKBH7	-0.510723	6.85e-28	negative
VEGFB	ALKBH7	0.547601	1.35e-32	postive
CBL	ALKBH8	0.610674	3.83e-42	postive
CREB1	ALKBH8	0.562187	1.26e-34	postive
GSK3B	ALKBH8	0.586594	2.99e-38	postive
NFAT5	ALKBH8	0.531175	1.98e-30	postive
NR2C2	ALKBH8	0.535094	6.18e-31	postive
PAK2	ALKBH8	0.512113	4.66e-28	postive
PIK3CA	ALKBH8	0.513333	3.32e-28	postive
SOS1	ALKBH8	0.634543	2.4e-46	postive
SOS2	ALKBH8	0.551324	4.18e-33	postive
UBR1	ALKBH8	0.54192	7.81e-32	postive
ADRM1	ALYREF	0.688468	2.4e-57	postive
ARAF	ALYREF	0.505756	2.67e-27	postive
BIRC5	ALYREF	0.687816	3.37e-57	postive
CD320	ALYREF	0.58068	2.41e-37	postive
CYLD	ALYREF	-0.516348	1.43e-28	negative
DAXX	ALYREF	0.641014	1.5e-47	postive
HDGF	ALYREF	0.606709	1.76e-41	postive
MANF	ALYREF	0.532594	1.3e-30	postive
MAP2K2	ALYREF	0.623946	1.95e-44	postive
NR2F6	ALYREF	0.592203	3.96e-39	postive
PPARA	ALYREF	-0.516608	1.33e-28	negative
PPP4C	ALYREF	0.64662	1.29e-48	postive
PSMC3	ALYREF	0.610495	4.1e-42	postive
PSMD3	ALYREF	0.660389	2.47e-51	postive
PSMD4	ALYREF	0.626001	8.44e-45	postive
RAC3	ALYREF	0.576267	1.11e-36	postive
RFXANK	ALYREF	0.591953	4.34e-39	postive
TMSB15A	ALYREF	0.525953	9.16e-30	postive
TOR2A	ALYREF	0.536281	4.33e-31	postive
TRIM27	ALYREF	0.508042	1.43e-27	postive
GRK2	AMPD2	0.530138	2.69e-30	postive
ACVR2B	ANG	-0.58456	6.15e-38	negative
ADM	ANG	0.630955	1.09e-45	postive
APOBEC3C	ANG	0.540685	1.14e-31	postive
APOBEC3F	ANG	0.616812	3.44e-43	postive
APOBEC3G	ANG	0.597374	5.93e-40	postive
B2M	ANG	0.558848	3.76e-34	postive
BCL10	ANG	0.531753	1.67e-30	postive
BCL3	ANG	0.622831	3.07e-44	postive
BMPR2	ANG	-0.509521	9.55e-28	negative
C3	ANG	0.503607	4.78e-27	postive
C5AR1	ANG	0.543496	4.81e-32	postive
CALR	ANG	0.583763	8.16e-38	postive
CD14	ANG	0.535866	4.9e-31	postive
CD74	ANG	0.51624	1.47e-28	postive
CD86	ANG	0.50945	9.73e-28	postive
CDC42	ANG	0.589447	1.07e-38	postive
CKLF	ANG	0.57673	9.5e-37	postive
CMTM3	ANG	0.507693	1.58e-27	postive
CMTM7	ANG	0.505772	2.66e-27	postive
CTF1	ANG	0.55533	1.17e-33	postive
CTSB	ANG	0.56836	1.63e-35	postive
CXCL16	ANG	0.524176	1.53e-29	postive
CXCR4	ANG	0.536763	3.74e-31	postive
FAS	ANG	0.636156	1.21e-46	postive
FCER1G	ANG	0.615361	6.11e-43	postive
FCGR2B	ANG	0.578969	4.37e-37	postive
FCGR3A	ANG	0.56595	3.65e-35	postive
FCGRT	ANG	0.642073	9.48e-48	postive
FPR1	ANG	0.54189	7.89e-32	postive
GMFG	ANG	0.594561	1.67e-39	postive
GRN	ANG	0.525802	9.57e-30	postive
GSK3B	ANG	-0.548084	1.16e-32	negative
HCST	ANG	0.556316	8.51e-34	postive
HDGFL3	ANG	-0.570595	7.7e-36	negative
HFE	ANG	0.627422	4.7e-45	postive
HLA-DMA	ANG	0.55405	1.76e-33	postive
HLA-DMB	ANG	0.541233	9.64e-32	postive
HLA-DRA	ANG	0.522415	2.55e-29	postive
IFNGR2	ANG	0.660704	2.13e-51	postive
IL10RB	ANG	0.623262	2.58e-44	postive
IL13RA1	ANG	0.511494	5.54e-28	postive
ISG20	ANG	0.525665	9.96e-30	postive
ITGB2	ANG	0.520531	4.36e-29	postive
LTBR	ANG	0.511908	4.94e-28	postive
MAPK8	ANG	-0.568705	1.45e-35	negative
MAPT	ANG	-0.640186	2.15e-47	negative
MICA	ANG	0.53967	1.55e-31	postive
MR1	ANG	0.514867	2.16e-28	postive
MSR1	ANG	0.614094	1.01e-42	postive
MYDGF	ANG	0.593127	2.83e-39	postive
NAMPT	ANG	0.608378	9.3e-42	postive
NR1D2	ANG	-0.518386	8.03e-29	negative
NR2C2	ANG	-0.50924	1.03e-27	negative
OSMR	ANG	0.551036	4.58e-33	postive
PLAUR	ANG	0.51389	2.84e-28	postive
PLSCR1	ANG	0.54746	1.41e-32	postive
PPIA	ANG	0.504614	3.64e-27	postive
PPP4C	ANG	0.500851	1e-26	postive
PRKCA	ANG	-0.517744	9.63e-29	negative
PSMB8	ANG	0.501278	8.94e-27	postive
PSMC2	ANG	0.531118	2.02e-30	postive
PSME1	ANG	0.50253	6.39e-27	postive
RABEP1	ANG	-0.594435	1.75e-39	negative
RAC2	ANG	0.566984	2.59e-35	postive
RELB	ANG	0.534918	6.51e-31	postive
RHOA	ANG	0.526563	7.67e-30	postive
RNASE2	ANG	0.633507	3.72e-46	postive
RNASE3	ANG	0.533678	9.43e-31	postive
S100A10	ANG	0.683855	2.6e-56	postive
S100A11	ANG	0.687893	3.24e-57	postive
S100A13	ANG	0.525347	1.09e-29	postive
S100A16	ANG	0.511466	5.58e-28	postive
S100A6	ANG	0.631615	8.24e-46	postive
S100A8	ANG	0.503252	5.26e-27	postive
S100A9	ANG	0.5223	2.63e-29	postive
SEMA4G	ANG	-0.535503	5.47e-31	negative
SEMA6B	ANG	-0.507047	1.88e-27	negative
SERPINA3	ANG	0.50772	1.56e-27	postive
SOS2	ANG	-0.523395	1.92e-29	negative
SPP1	ANG	0.544498	3.53e-32	postive
TANK	ANG	0.512533	4.15e-28	postive
TGFB1	ANG	0.51908	6.6e-29	postive
THRA	ANG	-0.510857	6.6e-28	negative
TMSB10	ANG	0.642459	8.01e-48	postive
TMSB4X	ANG	0.656833	1.28e-50	postive
TNFRSF11B	ANG	0.517746	9.63e-29	postive
TNFRSF14	ANG	0.538897	1.96e-31	postive
TNFRSF1A	ANG	0.669686	2.99e-53	postive
TNFSF12	ANG	0.545044	2.98e-32	postive
TYROBP	ANG	0.597851	4.97e-40	postive
UNC93B1	ANG	0.546862	1.7e-32	postive
VIM	ANG	0.683145	3.74e-56	postive
ADAR	ANKFY1	0.532488	1.34e-30	postive
ADCYAP1R1	ANKFY1	0.522682	2.36e-29	postive
AHNAK	ANKFY1	0.525371	1.08e-29	postive
BMPR2	ANKFY1	0.541394	9.18e-32	postive
CBL	ANKFY1	0.673159	5.51e-54	postive
CMTM4	ANKFY1	0.539428	1.67e-31	postive
FGF2	ANKFY1	0.542608	6.33e-32	postive
MANF	ANKFY1	-0.533448	1.01e-30	negative
MAPK1	ANKFY1	0.5118	5.09e-28	postive
MIF	ANKFY1	-0.57828	5.56e-37	negative
MYDGF	ANKFY1	-0.596024	9.77e-40	negative
NENF	ANKFY1	-0.6145	8.58e-43	negative
NFAT5	ANKFY1	0.615337	6.17e-43	postive
NR2C2	ANKFY1	0.649281	3.94e-49	postive
NR3C1	ANKFY1	0.528466	4.4e-30	postive
PIK3CA	ANKFY1	0.507568	1.63e-27	postive
PPARA	ANKFY1	0.639043	3.52e-47	postive
PPIA	ANKFY1	-0.512248	4.49e-28	negative
PPP4C	ANKFY1	-0.504115	4.17e-27	negative
PRKCA	ANKFY1	0.559713	2.84e-34	postive
PSMC3	ANKFY1	-0.503232	5.29e-27	negative
PSMD13	ANKFY1	-0.544552	3.48e-32	negative
PSMD8	ANKFY1	-0.525608	1.01e-29	negative
PTPN11	ANKFY1	0.640459	1.91e-47	postive
RABEP1	ANKFY1	0.534207	8.06e-31	postive
SEM1	ANKFY1	-0.51965	5.61e-29	negative
SEMA6A	ANKFY1	0.521884	2.96e-29	postive
SOS1	ANKFY1	0.619961	9.79e-44	postive
SOS2	ANKFY1	0.532559	1.32e-30	postive
SP1	ANKFY1	0.500298	1.16e-26	postive
TMSB10	ANKFY1	-0.627518	4.52e-45	negative
UBR1	ANKFY1	0.561246	1.72e-34	postive
HDGF	ANP32B	0.545393	2.68e-32	postive
ACVR2B	ANXA1	-0.559091	3.47e-34	negative
ANGPT1	ANXA1	0.524026	1.6e-29	postive
APOBEC3C	ANXA1	0.558147	4.72e-34	postive
APOBEC3F	ANXA1	0.606115	2.21e-41	postive
APOBEC3G	ANXA1	0.591191	5.72e-39	postive
B2M	ANXA1	0.50755	1.64e-27	postive
BCL10	ANXA1	0.554009	1.78e-33	postive
CDC42	ANXA1	0.542658	6.23e-32	postive
CMTM6	ANXA1	0.572086	4.65e-36	postive
CTF1	ANXA1	0.62513	1.21e-44	postive
FAS	ANXA1	0.637283	7.48e-47	postive
FCGR2B	ANXA1	0.50193	7.51e-27	postive
HFE	ANXA1	0.704631	3.98e-61	postive
HLA-DRA	ANXA1	0.515238	1.95e-28	postive
HSPA5	ANXA1	0.538293	2.36e-31	postive
IFNGR2	ANXA1	0.561225	1.73e-34	postive
IL10RB	ANXA1	0.565167	4.73e-35	postive
IL13RA1	ANXA1	0.532487	1.34e-30	postive
IL13RA2	ANXA1	0.561973	1.36e-34	postive
LTBP1	ANXA1	0.510987	6.37e-28	postive
MAPK8	ANXA1	-0.58057	2.5e-37	negative
MAPT	ANXA1	-0.608263	9.72e-42	negative
MICA	ANXA1	0.557695	5.46e-34	postive
MR1	ANXA1	0.608406	9.2e-42	postive
NAMPT	ANXA1	0.541827	8.04e-32	postive
OSMR	ANXA1	0.577694	6.81e-37	postive
PDIA3	ANXA1	0.570401	8.22e-36	postive
PLSCR1	ANXA1	0.59312	2.83e-39	postive
PSMC2	ANXA1	0.590116	8.44e-39	postive
S100A10	ANXA1	0.707992	6.03e-62	postive
S100A11	ANXA1	0.596842	7.22e-40	postive
S100A13	ANXA1	0.576088	1.18e-36	postive
S100A16	ANXA1	0.510569	7.15e-28	postive
S100A6	ANXA1	0.575345	1.53e-36	postive
SEMA4G	ANXA1	-0.567261	2.36e-35	negative
SEMA6B	ANXA1	-0.556395	8.3e-34	negative
SLC22A17	ANXA1	-0.553373	2.18e-33	negative
TANK	ANXA1	0.635455	1.63e-46	postive
THRA	ANXA1	-0.515919	1.61e-28	negative
TMSB4X	ANXA1	0.578632	4.92e-37	postive
TNC	ANXA1	0.555777	1.01e-33	postive
TNFRSF11B	ANXA1	0.650017	2.84e-49	postive
TNFRSF12A	ANXA1	0.58241	1.31e-37	postive
TNFRSF14	ANXA1	0.513928	2.81e-28	postive
TNFRSF1A	ANXA1	0.635879	1.36e-46	postive
TRIM5	ANXA1	0.527008	6.74e-30	postive
UNC93B1	ANXA1	0.500749	1.03e-26	postive
VIM	ANXA1	0.625982	8.5e-45	postive
C3AR1	ANXA11	0.512788	3.87e-28	postive
PAK1	ANXA11	0.509807	8.82e-28	postive
ACTG1	ANXA2	0.549496	7.45e-33	postive
ACVR2B	ANXA2	-0.590578	7.14e-39	negative
ADM	ANXA2	0.557722	5.41e-34	postive
ANGPTL4	ANXA2	0.534292	7.85e-31	postive
APOBEC3C	ANXA2	0.6955	5.84e-59	postive
APOBEC3F	ANXA2	0.653712	5.35e-50	postive
APOBEC3G	ANXA2	0.673409	4.87e-54	postive
B2M	ANXA2	0.587324	2.3e-38	postive
BCL10	ANXA2	0.639347	3.09e-47	postive
BCL3	ANXA2	0.742319	4.95e-71	postive
BMP1	ANXA2	0.547412	1.43e-32	postive
C5AR1	ANXA2	0.598143	4.46e-40	postive
CALR	ANXA2	0.669998	2.57e-53	postive
CCL2	ANXA2	0.608887	7.64e-42	postive
CD14	ANXA2	0.537259	3.22e-31	postive
CD40	ANXA2	0.61171	2.56e-42	postive
CD48	ANXA2	0.552196	3.17e-33	postive
CD70	ANXA2	0.5503	5.78e-33	postive
CD74	ANXA2	0.526473	7.88e-30	postive
CDC42	ANXA2	0.62706	5.46e-45	postive
CKLF	ANXA2	0.545433	2.65e-32	postive
CLCF1	ANXA2	0.652242	1.04e-49	postive
CMTM3	ANXA2	0.587318	2.31e-38	postive
CMTM4	ANXA2	-0.513254	3.4e-28	negative
CMTM6	ANXA2	0.625118	1.21e-44	postive
CMTM7	ANXA2	0.552856	2.57e-33	postive
CTSB	ANXA2	0.667413	8.92e-53	postive
CTSL	ANXA2	0.550403	5.6e-33	postive
CTSS	ANXA2	0.528014	5.02e-30	postive
CXCR4	ANXA2	0.543017	5.58e-32	postive
ENG	ANXA2	0.536774	3.73e-31	postive
FAM3C	ANXA2	0.51383	2.89e-28	postive
FAS	ANXA2	0.730982	7.08e-68	postive
FCER1G	ANXA2	0.641742	1.09e-47	postive
FCGR2B	ANXA2	0.700497	3.9e-60	postive
FCGR3A	ANXA2	0.572293	4.33e-36	postive
FCGRT	ANXA2	0.546514	1.89e-32	postive
FURIN	ANXA2	0.612928	1.59e-42	postive
GMFG	ANXA2	0.566342	3.2e-35	postive
GRN	ANXA2	0.609181	6.82e-42	postive
HDGFL3	ANXA2	-0.525431	1.07e-29	negative
HFE	ANXA2	0.697146	2.41e-59	postive
HLA-DMA	ANXA2	0.522402	2.55e-29	postive
HLA-DMB	ANXA2	0.508246	1.35e-27	postive
HLA-DRA	ANXA2	0.547893	1.23e-32	postive
HSPA5	ANXA2	0.655225	2.68e-50	postive
ICAM1	ANXA2	0.575773	1.32e-36	postive
IFNGR2	ANXA2	0.76008	2.52e-76	postive
IL10RB	ANXA2	0.730687	8.51e-68	postive
IL13RA1	ANXA2	0.569495	1.12e-35	postive
IL4R	ANXA2	0.524838	1.27e-29	postive
ISG20	ANXA2	0.541355	9.29e-32	postive
LCP2	ANXA2	0.525652	1e-29	postive
LIF	ANXA2	0.559122	3.44e-34	postive
LIMS1	ANXA2	0.682191	6.07e-56	postive
LTBR	ANXA2	0.553469	2.12e-33	postive
LYZ	ANXA2	0.510076	8.19e-28	postive
MANF	ANXA2	0.566708	2.84e-35	postive
MAPK8	ANXA2	-0.561554	1.56e-34	negative
MAPT	ANXA2	-0.681428	8.94e-56	negative
MDK	ANXA2	0.665632	2.09e-52	postive
MICA	ANXA2	0.577013	8.61e-37	postive
MR1	ANXA2	0.51832	8.18e-29	postive
MSR1	ANXA2	0.650302	2.49e-49	postive
MYDGF	ANXA2	0.631309	9.36e-46	postive
NAMPT	ANXA2	0.617313	2.82e-43	postive
NFKBIZ	ANXA2	0.634412	2.54e-46	postive
NOX4	ANXA2	0.53621	4.42e-31	postive
NRP1	ANXA2	0.700261	4.43e-60	postive
OSMR	ANXA2	0.712216	5.43e-63	postive
PDIA3	ANXA2	0.703708	6.64e-61	postive
PLAU	ANXA2	0.699805	5.69e-60	postive
PLAUR	ANXA2	0.713304	2.9e-63	postive
PLSCR1	ANXA2	0.586464	3.13e-38	postive
PLXNB1	ANXA2	-0.505867	2.59e-27	negative
PLXND1	ANXA2	0.543915	4.23e-32	postive
PPIA	ANXA2	0.61536	6.11e-43	postive
PRF1	ANXA2	0.526753	7.26e-30	postive
PROCR	ANXA2	0.594065	2.01e-39	postive
PSMC1	ANXA2	0.553443	2.14e-33	postive
PSMC2	ANXA2	0.651037	1.79e-49	postive
PTX3	ANXA2	0.545335	2.73e-32	postive
RABEP1	ANXA2	-0.583914	7.73e-38	negative
RAC2	ANXA2	0.687809	3.39e-57	postive
RELB	ANXA2	0.64651	1.35e-48	postive
RHOA	ANXA2	0.572171	4.52e-36	postive
RNASE2	ANXA2	0.579648	3.45e-37	postive
S100A10	ANXA2	0.71132	9.08e-63	postive
S100A11	ANXA2	0.849175	3.94e-112	postive
S100A13	ANXA2	0.537203	3.28e-31	postive
S100A16	ANXA2	0.598533	3.86e-40	postive
S100A6	ANXA2	0.673797	4.03e-54	postive
SDC1	ANXA2	0.604531	4.05e-41	postive
SDC2	ANXA2	0.631534	8.52e-46	postive
SEMA4G	ANXA2	-0.564042	6.87e-35	negative
SHC1	ANXA2	0.668124	6.34e-53	postive
SLC22A17	ANXA2	-0.566286	3.26e-35	negative
SOCS3	ANXA2	0.591378	5.34e-39	postive
SOS2	ANXA2	-0.512432	4.27e-28	negative
SPP1	ANXA2	0.556207	8.82e-34	postive
TANK	ANXA2	0.54783	1.25e-32	postive
TGFB1	ANXA2	0.649691	3.28e-49	postive
THRA	ANXA2	-0.638477	4.49e-47	negative
TMSB10	ANXA2	0.682654	4.8e-56	postive
TMSB4X	ANXA2	0.654449	3.82e-50	postive
TNC	ANXA2	0.591426	5.25e-39	postive
TNFRSF10B	ANXA2	0.521136	3.67e-29	postive
TNFRSF11A	ANXA2	0.519814	5.35e-29	postive
TNFRSF11B	ANXA2	0.562913	9.96e-35	postive
TNFRSF12A	ANXA2	0.731864	4.08e-68	postive
TNFRSF14	ANXA2	0.551193	4.36e-33	postive
TNFRSF1A	ANXA2	0.737039	1.53e-69	postive
TNFSF10	ANXA2	0.532402	1.38e-30	postive
TNFSF8	ANXA2	0.505336	2.99e-27	postive
TPM2	ANXA2	0.538262	2.38e-31	postive
TYMP	ANXA2	0.55201	3.37e-33	postive
TYROBP	ANXA2	0.563983	7e-35	postive
ULBP2	ANXA2	0.57026	8.62e-36	postive
ULBP3	ANXA2	0.52504	1.19e-29	postive
UNC93B1	ANXA2	0.53226	1.44e-30	postive
VIM	ANXA2	0.701621	2.1e-60	postive
ZYX	ANXA2	0.535616	5.28e-31	postive
ACVR2B	ANXA5	-0.597903	4.88e-40	negative
APOBEC3F	ANXA5	0.563598	7.95e-35	postive
APOBEC3G	ANXA5	0.537522	2.98e-31	postive
BMP2	ANXA5	-0.531946	1.58e-30	negative
CALR	ANXA5	0.583531	8.86e-38	postive
CASP3	ANXA5	0.659136	4.42e-51	postive
CDC42	ANXA5	0.517749	9.62e-29	postive
CDNF	ANXA5	-0.523904	1.66e-29	negative
CKLF	ANXA5	0.505119	3.18e-27	postive
CMTM3	ANXA5	0.585678	4.14e-38	postive
FABP7	ANXA5	0.630833	1.14e-45	postive
FAM3C	ANXA5	0.597416	5.84e-40	postive
FGFRL1	ANXA5	0.546812	1.72e-32	postive
GNAI1	ANXA5	-0.623062	2.8e-44	negative
HDAC1	ANXA5	0.509695	9.1e-28	postive
HFE	ANXA5	0.573814	2.58e-36	postive
HNF4G	ANXA5	0.502432	6.56e-27	postive
IFNGR2	ANXA5	0.594401	1.77e-39	postive
IL17RC	ANXA5	0.557539	5.74e-34	postive
IL1RAP	ANXA5	0.536434	4.13e-31	postive
MAPK8	ANXA5	-0.632752	5.11e-46	negative
MAPT	ANXA5	-0.640852	1.61e-47	negative
MDK	ANXA5	0.525964	9.13e-30	postive
MICA	ANXA5	0.557531	5.76e-34	postive
MYDGF	ANXA5	0.569297	1.19e-35	postive
NOX4	ANXA5	0.511957	4.87e-28	postive
PAK3	ANXA5	-0.521342	3.46e-29	negative
PAK5	ANXA5	-0.543868	4.29e-32	negative
PDGFA	ANXA5	0.634897	2.07e-46	postive
PLSCR1	ANXA5	0.588955	1.28e-38	postive
PPIA	ANXA5	0.616347	4.14e-43	postive
PPP4C	ANXA5	0.503701	4.66e-27	postive
PSMB8	ANXA5	0.523327	1.96e-29	postive
PSMC2	ANXA5	0.603266	6.54e-41	postive
PSMC4	ANXA5	0.606516	1.9e-41	postive
PSMD8	ANXA5	0.577363	7.63e-37	postive
PTN	ANXA5	0.569924	9.66e-36	postive
RABEP1	ANXA5	-0.516155	1.51e-28	negative
RAC1	ANXA5	0.56311	9.33e-35	postive
S100A13	ANXA5	0.57761	7.01e-37	postive
S100A16	ANXA5	0.684433	1.93e-56	postive
S100A6	ANXA5	0.547346	1.46e-32	postive
SEMA4G	ANXA5	-0.590625	7.02e-39	negative
SEMA6B	ANXA5	-0.574905	1.78e-36	negative
TANK	ANXA5	0.590496	7.35e-39	postive
TFRC	ANXA5	0.504134	4.15e-27	postive
THRA	ANXA5	-0.550961	4.69e-33	negative
TMSB4X	ANXA5	0.547105	1.57e-32	postive
TNFRSF12A	ANXA5	0.612445	1.92e-42	postive
TNFRSF19	ANXA5	0.545244	2.81e-32	postive
TNFRSF1A	ANXA5	0.626218	7.72e-45	postive
TRIM5	ANXA5	0.564319	6.27e-35	postive
UNC93B1	ANXA5	0.500063	1.24e-26	postive
VAV3	ANXA5	0.63153	8.53e-46	postive
VIM	ANXA5	0.607988	1.08e-41	postive
ZYX	ANXA5	0.608885	7.65e-42	postive
AP3B1	AP3B1	1	0	postive
CANX	AP3B1	0.581611	1.74e-37	postive
ERAP1	AP3B1	0.536928	3.56e-31	postive
HSPA4	AP3B1	0.530633	2.33e-30	postive
ZC3HAV1	AP3B1	0.508798	1.16e-27	postive
PSMC6	APEX1	0.503859	4.47e-27	postive
TRIM27	APEX1	0.535738	5.09e-31	postive
ARAF	APEX2	0.635653	1.5e-46	postive
BCL10	APEX2	0.527385	6.04e-30	postive
CALR	APEX2	0.514384	2.48e-28	postive
CMTM3	APEX2	0.512222	4.52e-28	postive
GRN	APEX2	0.603342	6.35e-41	postive
HDAC1	APEX2	0.533474	1e-30	postive
IL10RB	APEX2	0.56496	5.07e-35	postive
MANF	APEX2	0.525217	1.13e-29	postive
MICB	APEX2	0.528519	4.33e-30	postive
PDIA3	APEX2	0.551643	3.78e-33	postive
RAC2	APEX2	0.512177	4.58e-28	postive
SHC1	APEX2	0.516494	1.37e-28	postive
TXLNA	APEX2	0.597334	6.02e-40	postive
APOBEC3C	APOBEC3B	0.572909	3.52e-36	postive
APOBEC3F	APOBEC3B	0.613767	1.14e-42	postive
APOBEC3G	APOBEC3B	0.580688	2.4e-37	postive
CALR	APOBEC3B	0.589169	1.19e-38	postive
CKLF	APOBEC3B	0.515475	1.82e-28	postive
IFNGR2	APOBEC3B	0.617997	2.15e-43	postive
IL10RB	APOBEC3B	0.552425	2.95e-33	postive
MANF	APOBEC3B	0.554904	1.34e-33	postive
MAPT	APOBEC3B	-0.5211	3.71e-29	negative
MDK	APOBEC3B	0.61483	7.53e-43	postive
MYDGF	APOBEC3B	0.573488	2.89e-36	postive
NRP1	APOBEC3B	0.500069	1.24e-26	postive
PDIA3	APOBEC3B	0.515397	1.87e-28	postive
PPIA	APOBEC3B	0.625696	9.56e-45	postive
PSMB8	APOBEC3B	0.54168	8.41e-32	postive
PSMC1	APOBEC3B	0.52427	1.49e-29	postive
PSMC2	APOBEC3B	0.585939	3.77e-38	postive
PSMD8	APOBEC3B	0.509796	8.85e-28	postive
S100A11	APOBEC3B	0.522503	2.48e-29	postive
S100A16	APOBEC3B	0.547583	1.36e-32	postive
SHC1	APOBEC3B	0.5269	6.96e-30	postive
TMSB10	APOBEC3B	0.522224	2.69e-29	postive
TNFRSF1A	APOBEC3B	0.511699	5.23e-28	postive
ACVR2B	APOBEC3C	-0.58736	2.27e-38	negative
ADA2	APOBEC3C	0.67614	1.27e-54	postive
APOBEC3C	APOBEC3C	1	0	postive
APOBEC3F	APOBEC3C	0.812222	5.82e-95	postive
APOBEC3G	APOBEC3C	0.797573	3.54e-89	postive
B2M	APOBEC3C	0.636535	1.03e-46	postive
BCL3	APOBEC3C	0.594365	1.8e-39	postive
BST2	APOBEC3C	0.515253	1.94e-28	postive
BTK	APOBEC3C	0.59076	6.68e-39	postive
C3	APOBEC3C	0.598439	4e-40	postive
C3AR1	APOBEC3C	0.586671	2.91e-38	postive
CALR	APOBEC3C	0.546841	1.71e-32	postive
CCL2	APOBEC3C	0.520177	4.83e-29	postive
CCL5	APOBEC3C	0.576561	1.01e-36	postive
CCR1	APOBEC3C	0.555446	1.13e-33	postive
CCR5	APOBEC3C	0.66227	1.02e-51	postive
CCRL2	APOBEC3C	0.548547	1e-32	postive
CD14	APOBEC3C	0.574123	2.32e-36	postive
CD3D	APOBEC3C	0.589214	1.17e-38	postive
CD3E	APOBEC3C	0.586097	3.56e-38	postive
CD4	APOBEC3C	0.610877	3.54e-42	postive
CD40	APOBEC3C	0.624032	1.89e-44	postive
CD48	APOBEC3C	0.638917	3.71e-47	postive
CD74	APOBEC3C	0.716485	4.55e-64	postive
CD86	APOBEC3C	0.615482	5.82e-43	postive
CMTM3	APOBEC3C	0.504316	3.95e-27	postive
CMTM6	APOBEC3C	0.612517	1.87e-42	postive
CMTM7	APOBEC3C	0.609296	6.53e-42	postive
CSF2RB	APOBEC3C	0.525668	9.95e-30	postive
CSF3R	APOBEC3C	0.54153	8.8e-32	postive
CTF1	APOBEC3C	0.504028	4.27e-27	postive
CTSB	APOBEC3C	0.646285	1.49e-48	postive
CTSS	APOBEC3C	0.651134	1.72e-49	postive
CXCL16	APOBEC3C	0.639954	2.38e-47	postive
CXCR4	APOBEC3C	0.506386	2.25e-27	postive
CYBB	APOBEC3C	0.625919	8.73e-45	postive
ENG	APOBEC3C	0.545705	2.43e-32	postive
FAS	APOBEC3C	0.596969	6.89e-40	postive
FCER1G	APOBEC3C	0.687538	3.9e-57	postive
FCGR2B	APOBEC3C	0.612822	1.66e-42	postive
FCGR3A	APOBEC3C	0.663754	5.09e-52	postive
FCGRT	APOBEC3C	0.599609	2.58e-40	postive
FPR1	APOBEC3C	0.51635	1.43e-28	postive
FURIN	APOBEC3C	0.517867	9.3e-29	postive
GMFG	APOBEC3C	0.571519	5.64e-36	postive
GRN	APOBEC3C	0.67622	1.22e-54	postive
HCK	APOBEC3C	0.580225	2.83e-37	postive
HCST	APOBEC3C	0.532872	1.2e-30	postive
HDGFL3	APOBEC3C	-0.555863	9.85e-34	negative
HFE	APOBEC3C	0.774756	4.66e-81	postive
HLA-B	APOBEC3C	0.509508	9.58e-28	postive
HLA-DMA	APOBEC3C	0.695456	5.98e-59	postive
HLA-DMB	APOBEC3C	0.652387	9.75e-50	postive
HLA-DOA	APOBEC3C	0.534113	8.29e-31	postive
HLA-DPA1	APOBEC3C	0.608764	8.02e-42	postive
HLA-DPB1	APOBEC3C	0.648467	5.67e-49	postive
HLA-DQA1	APOBEC3C	0.623911	1.98e-44	postive
HLA-DQB1	APOBEC3C	0.576944	8.82e-37	postive
HLA-DRA	APOBEC3C	0.670387	2.13e-53	postive
HLA-DRB1	APOBEC3C	0.655654	2.2e-50	postive
IFNGR2	APOBEC3C	0.70822	5.3e-62	postive
IKBKE	APOBEC3C	0.620973	6.52e-44	postive
IL10RA	APOBEC3C	0.554603	1.47e-33	postive
IL10RB	APOBEC3C	0.677014	8.2e-55	postive
IL12RB1	APOBEC3C	0.564022	6.91e-35	postive
IL13RA1	APOBEC3C	0.6868	5.71e-57	postive
IL16	APOBEC3C	0.56678	2.77e-35	postive
IL17RA	APOBEC3C	0.513315	3.34e-28	postive
IL18	APOBEC3C	0.565021	4.97e-35	postive
IL2RG	APOBEC3C	0.639777	2.56e-47	postive
IL4R	APOBEC3C	0.553587	2.04e-33	postive
IRF5	APOBEC3C	0.554174	1.69e-33	postive
ITGB2	APOBEC3C	0.672065	9.4e-54	postive
LCP2	APOBEC3C	0.660174	2.73e-51	postive
LIMS1	APOBEC3C	0.64523	2.38e-48	postive
LTBR	APOBEC3C	0.567635	2.08e-35	postive
LYN	APOBEC3C	0.673501	4.66e-54	postive
LYZ	APOBEC3C	0.587938	1.85e-38	postive
MAPK8	APOBEC3C	-0.594744	1.56e-39	negative
MAPT	APOBEC3C	-0.648201	6.38e-49	negative
MDK	APOBEC3C	0.532216	1.46e-30	postive
MICA	APOBEC3C	0.52107	3.74e-29	postive
MR1	APOBEC3C	0.699237	7.75e-60	postive
MSR1	APOBEC3C	0.645287	2.32e-48	postive
NAMPT	APOBEC3C	0.525703	9.85e-30	postive
NFKBIZ	APOBEC3C	0.502258	6.88e-27	postive
NOD2	APOBEC3C	0.514746	2.24e-28	postive
NRP1	APOBEC3C	0.608963	7.42e-42	postive
OSMR	APOBEC3C	0.650644	2.14e-49	postive
PDIA3	APOBEC3C	0.612096	2.2e-42	postive
PIK3CG	APOBEC3C	0.563893	7.21e-35	postive
PIK3R5	APOBEC3C	0.543655	4.59e-32	postive
PLAUR	APOBEC3C	0.556903	7.05e-34	postive
PLSCR1	APOBEC3C	0.594628	1.63e-39	postive
PLXNB2	APOBEC3C	0.514324	2.52e-28	postive
PLXND1	APOBEC3C	0.532813	1.22e-30	postive
PPARG	APOBEC3C	0.517313	1.09e-28	postive
PROCR	APOBEC3C	0.589158	1.19e-38	postive
PSMC2	APOBEC3C	0.611023	3.34e-42	postive
PTAFR	APOBEC3C	0.520612	4.27e-29	postive
PTGER4	APOBEC3C	0.548555	1e-32	postive
PTPN6	APOBEC3C	0.579448	3.7e-37	postive
PTPRC	APOBEC3C	0.54621	2.08e-32	postive
RAC2	APOBEC3C	0.721982	1.75e-65	postive
RELB	APOBEC3C	0.554967	1.31e-33	postive
RNASE2	APOBEC3C	0.582034	1.5e-37	postive
S100A10	APOBEC3C	0.560099	2.5e-34	postive
S100A11	APOBEC3C	0.763154	2.75e-77	postive
S100A16	APOBEC3C	0.548509	1.01e-32	postive
SDC1	APOBEC3C	0.520588	4.29e-29	postive
SDC2	APOBEC3C	0.502547	6.36e-27	postive
SECTM1	APOBEC3C	0.535308	5.8e-31	postive
SEMA4G	APOBEC3C	-0.541243	9.61e-32	negative
SHC1	APOBEC3C	0.636349	1.12e-46	postive
SLC22A17	APOBEC3C	-0.557298	6.2e-34	negative
SPP1	APOBEC3C	0.552539	2.85e-33	postive
SYK	APOBEC3C	0.552048	3.33e-33	postive
TANK	APOBEC3C	0.511374	5.72e-28	postive
TAPBPL	APOBEC3C	0.571989	4.8e-36	postive
TGFB1	APOBEC3C	0.643055	6.18e-48	postive
TGFBR2	APOBEC3C	0.621637	4.99e-44	postive
THRA	APOBEC3C	-0.545106	2.93e-32	negative
TLR1	APOBEC3C	0.63874	4.01e-47	postive
TLR2	APOBEC3C	0.603638	5.68e-41	postive
TLR3	APOBEC3C	0.556014	9.38e-34	postive
TLR7	APOBEC3C	0.52036	4.58e-29	postive
TLR8	APOBEC3C	0.562457	1.16e-34	postive
TMSB4X	APOBEC3C	0.57256	3.96e-36	postive
TNFRSF10A	APOBEC3C	0.537118	3.36e-31	postive
TNFRSF10B	APOBEC3C	0.511643	5.31e-28	postive
TNFRSF10C	APOBEC3C	0.57414	2.31e-36	postive
TNFRSF11A	APOBEC3C	0.61579	5.16e-43	postive
TNFRSF14	APOBEC3C	0.661797	1.28e-51	postive
TNFRSF1A	APOBEC3C	0.725104	2.65e-66	postive
TNFRSF1B	APOBEC3C	0.513745	2.96e-28	postive
TNFSF10	APOBEC3C	0.565127	4.8e-35	postive
TNFSF12	APOBEC3C	0.517997	8.97e-29	postive
TNFSF13	APOBEC3C	0.608384	9.28e-42	postive
TNFSF8	APOBEC3C	0.632163	6.55e-46	postive
TRIM22	APOBEC3C	0.550229	5.91e-33	postive
TRIM5	APOBEC3C	0.54558	2.53e-32	postive
TYMP	APOBEC3C	0.57823	5.65e-37	postive
TYROBP	APOBEC3C	0.623928	1.97e-44	postive
UNC93B1	APOBEC3C	0.657799	8.22e-51	postive
VAV1	APOBEC3C	0.569977	9.49e-36	postive
VIM	APOBEC3C	0.556321	8.5e-34	postive
ACVR2B	APOBEC3D	-0.539398	1.69e-31	negative
ADA2	APOBEC3D	0.606131	2.2e-41	postive
APOBEC3C	APOBEC3D	0.746075	4.09e-72	postive
APOBEC3F	APOBEC3D	0.82581	8.45e-101	postive
APOBEC3G	APOBEC3D	0.835495	2.8e-105	postive
B2M	APOBEC3D	0.660391	2.47e-51	postive
BCL3	APOBEC3D	0.504325	3.94e-27	postive
BST2	APOBEC3D	0.597972	4.75e-40	postive
CALR	APOBEC3D	0.524138	1.55e-29	postive
CCL5	APOBEC3D	0.646275	1.5e-48	postive
CCR5	APOBEC3D	0.62636	7.28e-45	postive
CCRL2	APOBEC3D	0.509209	1.04e-27	postive
CD3D	APOBEC3D	0.662437	9.47e-52	postive
CD3E	APOBEC3D	0.702301	1.45e-60	postive
CD4	APOBEC3D	0.506507	2.18e-27	postive
CD40	APOBEC3D	0.621051	6.31e-44	postive
CD48	APOBEC3D	0.685772	9.72e-57	postive
CD72	APOBEC3D	0.524862	1.26e-29	postive
CD74	APOBEC3D	0.639522	2.86e-47	postive
CD8A	APOBEC3D	0.599502	2.69e-40	postive
CMTM7	APOBEC3D	0.515946	1.6e-28	postive
CSF3R	APOBEC3D	0.5047	3.56e-27	postive
CTSS	APOBEC3D	0.569715	1.04e-35	postive
CXCL10	APOBEC3D	0.52659	7.61e-30	postive
CXCL16	APOBEC3D	0.523129	2.07e-29	postive
CYBB	APOBEC3D	0.503578	4.82e-27	postive
ENG	APOBEC3D	0.50426	4.01e-27	postive
FAS	APOBEC3D	0.573962	2.45e-36	postive
FCER1G	APOBEC3D	0.572233	4.42e-36	postive
FCGR2B	APOBEC3D	0.517821	9.43e-29	postive
FCGR3A	APOBEC3D	0.536035	4.66e-31	postive
FCGRT	APOBEC3D	0.589442	1.08e-38	postive
GMFG	APOBEC3D	0.50765	1.59e-27	postive
GRN	APOBEC3D	0.620538	7.76e-44	postive
HFE	APOBEC3D	0.647623	8.26e-49	postive
HLA-A	APOBEC3D	0.595128	1.36e-39	postive
HLA-B	APOBEC3D	0.620058	9.41e-44	postive
HLA-C	APOBEC3D	0.573148	3.24e-36	postive
HLA-DMA	APOBEC3D	0.599722	2.48e-40	postive
HLA-DMB	APOBEC3D	0.548218	1.11e-32	postive
HLA-DPA1	APOBEC3D	0.575629	1.39e-36	postive
HLA-DPB1	APOBEC3D	0.581977	1.53e-37	postive
HLA-DQA1	APOBEC3D	0.565862	3.76e-35	postive
HLA-DQB1	APOBEC3D	0.504336	3.93e-27	postive
HLA-DRA	APOBEC3D	0.577775	6.62e-37	postive
HLA-DRB1	APOBEC3D	0.572244	4.41e-36	postive
HLA-E	APOBEC3D	0.543662	4.57e-32	postive
HLA-F	APOBEC3D	0.528464	4.4e-30	postive
IFNGR2	APOBEC3D	0.613989	1.05e-42	postive
IKBKE	APOBEC3D	0.503903	4.42e-27	postive
IL10RB	APOBEC3D	0.62238	3.69e-44	postive
IL12RB1	APOBEC3D	0.548045	1.17e-32	postive
IL2RG	APOBEC3D	0.695748	5.11e-59	postive
IL4R	APOBEC3D	0.518838	7.07e-29	postive
IRF1	APOBEC3D	0.599616	2.58e-40	postive
ISG20	APOBEC3D	0.568351	1.64e-35	postive
ITGB2	APOBEC3D	0.550975	4.67e-33	postive
LCP2	APOBEC3D	0.600836	1.63e-40	postive
LYN	APOBEC3D	0.55376	1.93e-33	postive
LYZ	APOBEC3D	0.531935	1.58e-30	postive
MAPK8	APOBEC3D	-0.521451	3.36e-29	negative
MAPT	APOBEC3D	-0.586312	3.3e-38	negative
MDK	APOBEC3D	0.53823	2.4e-31	postive
MICA	APOBEC3D	0.539011	1.9e-31	postive
MICB	APOBEC3D	0.540113	1.36e-31	postive
MR1	APOBEC3D	0.58102	2.14e-37	postive
MSR1	APOBEC3D	0.568301	1.67e-35	postive
NRP1	APOBEC3D	0.511901	4.95e-28	postive
OAS1	APOBEC3D	0.503789	4.55e-27	postive
OSMR	APOBEC3D	0.541558	8.73e-32	postive
PDIA3	APOBEC3D	0.533156	1.1e-30	postive
PLSCR1	APOBEC3D	0.584968	5.32e-38	postive
PLXND1	APOBEC3D	0.515928	1.61e-28	postive
PML	APOBEC3D	0.540368	1.26e-31	postive
PSMB8	APOBEC3D	0.585272	4.78e-38	postive
PSMC2	APOBEC3D	0.511298	5.84e-28	postive
PSME2	APOBEC3D	0.559629	2.92e-34	postive
PTGER4	APOBEC3D	0.60568	2.62e-41	postive
RAC2	APOBEC3D	0.656667	1.38e-50	postive
RELB	APOBEC3D	0.532414	1.37e-30	postive
S100A11	APOBEC3D	0.59666	7.73e-40	postive
SECTM1	APOBEC3D	0.59602	9.79e-40	postive
SHC1	APOBEC3D	0.568002	1.84e-35	postive
SLC40A1	APOBEC3D	0.502816	5.92e-27	postive
SOCS1	APOBEC3D	0.632725	5.17e-46	postive
TAPBPL	APOBEC3D	0.515042	2.06e-28	postive
TGFB1	APOBEC3D	0.588746	1.38e-38	postive
TLR1	APOBEC3D	0.542996	5.62e-32	postive
TLR2	APOBEC3D	0.526874	7.01e-30	postive
TLR8	APOBEC3D	0.516973	1.2e-28	postive
TNFRSF11A	APOBEC3D	0.522664	2.37e-29	postive
TNFRSF14	APOBEC3D	0.764958	7.36e-78	postive
TNFRSF1A	APOBEC3D	0.582076	1.48e-37	postive
TNFSF10	APOBEC3D	0.583007	1.06e-37	postive
TNFSF8	APOBEC3D	0.562725	1.06e-34	postive
TRIM22	APOBEC3D	0.615499	5.78e-43	postive
TRIM5	APOBEC3D	0.581608	1.74e-37	postive
TYMP	APOBEC3D	0.557745	5.37e-34	postive
TYROBP	APOBEC3D	0.525699	9.86e-30	postive
UNC93B1	APOBEC3D	0.638324	4.79e-47	postive
BMPR2	AQR	0.561354	1.66e-34	postive
BRAF	AQR	0.564796	5.35e-35	postive
CBL	AQR	0.615818	5.1e-43	postive
CMTM1	AQR	0.511189	6.03e-28	postive
CREB1	AQR	0.667661	7.92e-53	postive
GSK3B	AQR	0.562317	1.21e-34	postive
IREB2	AQR	0.713092	3.28e-63	postive
KRAS	AQR	0.536002	4.71e-31	postive
MIF	AQR	-0.506551	2.15e-27	negative
NENF	AQR	-0.528525	4.33e-30	negative
NFAT5	AQR	0.577006	8.63e-37	postive
NFATC3	AQR	0.515096	2.03e-28	postive
NFYA	AQR	0.604587	3.96e-41	postive
NR2C2	AQR	0.696373	3.65e-59	postive
NR3C1	AQR	0.512371	4.34e-28	postive
SOS1	AQR	0.67237	8.1e-54	postive
SOS2	AQR	0.528434	4.44e-30	postive
SP1	AQR	0.577342	7.69e-37	postive
UBR1	AQR	0.816442	1.01e-96	postive
ACVR1B	ARF3	0.561101	1.8e-34	postive
ARRB1	ARF3	0.50307	5.53e-27	postive
CHGA	ARF3	0.503793	4.55e-27	postive
CHGB	ARF3	0.505896	2.57e-27	postive
FGF13	ARF3	0.505566	2.81e-27	postive
HDAC1	ARF3	-0.520471	4.44e-29	negative
MAPK1	ARF3	0.540286	1.29e-31	postive
NR3C2	ARF3	0.504329	3.93e-27	postive
PAK3	ARF3	0.522074	2.81e-29	postive
PPP3CA	ARF3	0.568391	1.62e-35	postive
PPP3CB	ARF3	0.524893	1.25e-29	postive
PRKCB	ARF3	0.564522	5.86e-35	postive
PRKCG	ARF3	0.501108	9.36e-27	postive
SEMA4A	ARF3	0.503123	5.45e-27	postive
THRB	ARF3	0.623938	1.96e-44	postive
BCL10	ARF4	0.566233	3.32e-35	postive
CALR	ARF4	0.50901	1.1e-27	postive
CDC42	ARF4	0.67323	5.32e-54	postive
CKLF	ARF4	0.560191	2.43e-34	postive
CMTM6	ARF4	0.698977	8.93e-60	postive
IFNGR2	ARF4	0.629866	1.71e-45	postive
IL10RB	ARF4	0.518341	8.13e-29	postive
MANF	ARF4	0.601643	1.21e-40	postive
MAPT	ARF4	-0.554503	1.52e-33	negative
MDK	ARF4	0.512622	4.05e-28	postive
MYDGF	ARF4	0.549838	6.69e-33	postive
NCK1	ARF4	0.523914	1.65e-29	postive
NRAS	ARF4	0.567235	2.38e-35	postive
PPIA	ARF4	0.624069	1.86e-44	postive
PPP4C	ARF4	0.507513	1.66e-27	postive
PSMC1	ARF4	0.557777	5.32e-34	postive
PSMC2	ARF4	0.696918	2.72e-59	postive
PSMD14	ARF4	0.638962	3.64e-47	postive
PSMD6	ARF4	0.702075	1.64e-60	postive
PSMD8	ARF4	0.540545	1.19e-31	postive
RBP1	ARF4	0.51126	5.91e-28	postive
RHOA	ARF4	0.708576	4.33e-62	postive
S100A11	ARF4	0.529841	2.94e-30	postive
S100A6	ARF4	0.501784	7.81e-27	postive
SEM1	ARF4	0.500705	1.04e-26	postive
SLC22A17	ARF4	-0.526309	8.26e-30	negative
THRA	ARF4	-0.533562	9.77e-31	negative
TMSB10	ARF4	0.570364	8.33e-36	postive
TMSB4X	ARF4	0.575818	1.3e-36	postive
ADA2	ARL11	0.657594	9.03e-51	postive
APOBEC3C	ARL11	0.651479	1.47e-49	postive
APOBEC3F	ARL11	0.602157	9.94e-41	postive
APOBEC3G	ARL11	0.686071	8.33e-57	postive
AQP9	ARL11	0.745642	5.47e-72	postive
B2M	ARL11	0.700476	3.94e-60	postive
BLNK	ARL11	0.56811	1.78e-35	postive
BTK	ARL11	0.842511	1.03e-108	postive
C3	ARL11	0.73309	1.89e-68	postive
C3AR1	ARL11	0.80811	2.75e-93	postive
C5AR1	ARL11	0.667947	6.9e-53	postive
CCL18	ARL11	0.584404	6.5e-38	postive
CCL2	ARL11	0.556776	7.34e-34	postive
CCL20	ARL11	0.618468	1.78e-43	postive
CCL5	ARL11	0.571587	5.51e-36	postive
CCL8	ARL11	0.528957	3.81e-30	postive
CCR1	ARL11	0.818002	2.2e-97	postive
CCR5	ARL11	0.75603	4.46e-75	postive
CCRL2	ARL11	0.871885	3.7e-125	postive
CD14	ARL11	0.840221	1.42e-107	postive
CD3D	ARL11	0.628591	2.9e-45	postive
CD3E	ARL11	0.51853	7.71e-29	postive
CD4	ARL11	0.834267	1.07e-104	postive
CD40	ARL11	0.683849	2.61e-56	postive
CD48	ARL11	0.721394	2.49e-65	postive
CD72	ARL11	0.626408	7.14e-45	postive
CD74	ARL11	0.735949	3.07e-69	postive
CD86	ARL11	0.868289	6.16e-123	postive
CKLF	ARL11	0.520771	4.08e-29	postive
CMTM6	ARL11	0.627731	4.14e-45	postive
CMTM7	ARL11	0.756493	3.22e-75	postive
CRLF3	ARL11	0.556919	7.01e-34	postive
CSF1R	ARL11	0.654208	4.27e-50	postive
CSF2RA	ARL11	0.655817	2.05e-50	postive
CSF2RB	ARL11	0.768205	6.67e-79	postive
CSF3R	ARL11	0.818244	1.73e-97	postive
CTSB	ARL11	0.7661	3.18e-78	postive
CTSL	ARL11	0.693716	1.51e-58	postive
CTSS	ARL11	0.924869	8.7e-169	postive
CXCL12	ARL11	0.525109	1.17e-29	postive
CXCL16	ARL11	0.752816	4.18e-74	postive
CXCL5	ARL11	0.55603	9.33e-34	postive
CYBB	ARL11	0.765941	3.57e-78	postive
EBI3	ARL11	0.65593	1.94e-50	postive
ENG	ARL11	0.553657	1.99e-33	postive
FAS	ARL11	0.646327	1.47e-48	postive
FCER1G	ARL11	0.898986	2.02e-144	postive
FCGR2B	ARL11	0.637757	6.11e-47	postive
FCGR3A	ARL11	0.87994	2.17e-130	postive
FCGR3B	ARL11	0.648986	4.5e-49	postive
FCGRT	ARL11	0.760543	1.81e-76	postive
FGR	ARL11	0.612969	1.56e-42	postive
FPR1	ARL11	0.832115	1.1e-103	postive
GMFG	ARL11	0.840227	1.41e-107	postive
GRN	ARL11	0.691688	4.44e-58	postive
HAMP	ARL11	0.730744	8.21e-68	postive
HCK	ARL11	0.878055	3.92e-129	postive
HCST	ARL11	0.74725	1.86e-72	postive
HFE	ARL11	0.648642	5.24e-49	postive
HLA-DMA	ARL11	0.821691	5.61e-99	postive
HLA-DMB	ARL11	0.911762	1.66e-155	postive
HLA-DOA	ARL11	0.623551	2.3e-44	postive
HLA-DPA1	ARL11	0.652334	9.99e-50	postive
HLA-DPB1	ARL11	0.700898	3.13e-60	postive
HLA-DQA1	ARL11	0.683401	3.28e-56	postive
HLA-DQB1	ARL11	0.718103	1.76e-64	postive
HLA-DRA	ARL11	0.793087	1.68e-87	postive
HLA-DRB1	ARL11	0.725976	1.56e-66	postive
HLA-DRB5	ARL11	0.552582	2.81e-33	postive
HLA-E	ARL11	0.542696	6.16e-32	postive
HMOX1	ARL11	0.603884	5.18e-41	postive
IFNGR1	ARL11	0.686527	6.58e-57	postive
IFNGR2	ARL11	0.617721	2.4e-43	postive
IKBKE	ARL11	0.620465	7.99e-44	postive
IL10	ARL11	0.816934	6.25e-97	postive
IL10RA	ARL11	0.789358	3.88e-86	postive
IL10RB	ARL11	0.695529	5.75e-59	postive
IL12RB1	ARL11	0.752576	4.93e-74	postive
IL13RA1	ARL11	0.642914	6.57e-48	postive
IL15RA	ARL11	0.579141	4.12e-37	postive
IL16	ARL11	0.776816	9.44e-82	postive
IL17RA	ARL11	0.527427	5.96e-30	postive
IL18	ARL11	0.822902	1.65e-99	postive
IL1R2	ARL11	0.535915	4.83e-31	postive
IL21R	ARL11	0.601992	1.06e-40	postive
IL2RA	ARL11	0.58414	7.14e-38	postive
IL2RG	ARL11	0.685531	1.1e-56	postive
IL4R	ARL11	0.688123	2.88e-57	postive
IL6R	ARL11	0.569468	1.13e-35	postive
IL7R	ARL11	0.547792	1.27e-32	postive
IRF5	ARL11	0.741632	7.77e-71	postive
ITGAL	ARL11	0.613769	1.14e-42	postive
ITGB2	ARL11	0.851124	3.66e-113	postive
LCP2	ARL11	0.803645	1.63e-91	postive
LGMN	ARL11	0.636442	1.07e-46	postive
LTBR	ARL11	0.619115	1.37e-43	postive
LYN	ARL11	0.85874	2.44e-117	postive
LYZ	ARL11	0.769189	3.2e-79	postive
MAP3K8	ARL11	0.783813	3.66e-84	postive
MAPT	ARL11	-0.505985	2.51e-27	negative
MR1	ARL11	0.654487	3.76e-50	postive
MSR1	ARL11	0.893279	6.11e-140	postive
NAMPT	ARL11	0.523222	2.02e-29	postive
NFATC2	ARL11	0.527008	6.74e-30	postive
NFKBIZ	ARL11	0.528741	4.06e-30	postive
NOD2	ARL11	0.675099	2.12e-54	postive
OLR1	ARL11	0.56718	2.42e-35	postive
OSM	ARL11	0.51406	2.71e-28	postive
PIK3CG	ARL11	0.698649	1.07e-59	postive
PIK3R5	ARL11	0.765741	4.14e-78	postive
PLAUR	ARL11	0.568215	1.71e-35	postive
PLCG2	ARL11	0.710487	1.46e-62	postive
PLSCR1	ARL11	0.573436	2.94e-36	postive
PLTP	ARL11	0.663893	4.76e-52	postive
PPARG	ARL11	0.729818	1.46e-67	postive
PTAFR	ARL11	0.774719	4.79e-81	postive
PTGER4	ARL11	0.554154	1.7e-33	postive
PTPN6	ARL11	0.817762	2.78e-97	postive
PTPRC	ARL11	0.741432	8.86e-71	postive
RAC2	ARL11	0.741879	6.61e-71	postive
RHOA	ARL11	0.511276	5.88e-28	postive
RNASE2	ARL11	0.803613	1.68e-91	postive
RNASE3	ARL11	0.73765	1.03e-69	postive
S100A11	ARL11	0.723558	6.77e-66	postive
S100A12	ARL11	0.538596	2.15e-31	postive
S100A8	ARL11	0.793289	1.42e-87	postive
S100A9	ARL11	0.808418	2.07e-93	postive
SLC11A1	ARL11	0.65329	6.48e-50	postive
SLC29A3	ARL11	0.557022	6.78e-34	postive
SPP1	ARL11	0.765074	6.76e-78	postive
SYK	ARL11	0.81569	2.1e-96	postive
TGFB1	ARL11	0.592985	2.98e-39	postive
TGFBR1	ARL11	0.611755	2.51e-42	postive
TGFBR2	ARL11	0.667132	1.02e-52	postive
TLR1	ARL11	0.815544	2.41e-96	postive
TLR2	ARL11	0.81554	2.42e-96	postive
TLR3	ARL11	0.527447	5.93e-30	postive
TLR7	ARL11	0.720586	4.03e-65	postive
TLR8	ARL11	0.786579	3.85e-85	postive
TMSB4X	ARL11	0.687079	4.95e-57	postive
TNFRSF10A	ARL11	0.512419	4.28e-28	postive
TNFRSF10C	ARL11	0.513771	2.94e-28	postive
TNFRSF11A	ARL11	0.619105	1.38e-43	postive
TNFRSF14	ARL11	0.575403	1.5e-36	postive
TNFRSF1A	ARL11	0.533358	1.04e-30	postive
TNFRSF1B	ARL11	0.736771	1.82e-69	postive
TNFSF10	ARL11	0.564843	5.27e-35	postive
TNFSF12	ARL11	0.582887	1.11e-37	postive
TNFSF13	ARL11	0.757693	1.38e-75	postive
TNFSF8	ARL11	0.853462	2.03e-114	postive
TYMP	ARL11	0.685117	1.36e-56	postive
TYROBP	ARL11	0.916458	5.18e-160	postive
UNC93B1	ARL11	0.643497	5.09e-48	postive
VAV1	ARL11	0.811113	1.66e-94	postive
CMTM6	ARL5A	0.582854	1.12e-37	postive
CRLF3	ARL5A	0.524086	1.57e-29	postive
CYBB	ARL5A	0.515173	1.99e-28	postive
DCK	ARL5A	0.600293	2e-40	postive
IFNGR1	ARL5A	0.525125	1.16e-29	postive
LYN	ARL5A	0.52371	1.75e-29	postive
NCK1	ARL5A	0.572145	4.56e-36	postive
PIK3CG	ARL5A	0.516041	1.56e-28	postive
PTPRC	ARL5A	0.567103	2.49e-35	postive
TANK	ARL5A	0.561815	1.43e-34	postive
TGFBR1	ARL5A	0.58874	1.39e-38	postive
TLR1	ARL5A	0.537255	3.23e-31	postive
TLR7	ARL5A	0.507855	1.51e-27	postive
CACYBP	ARL6	0.522185	2.72e-29	postive
PAK1	ARL6	0.559131	3.43e-34	postive
PPP3R1	ARL6	0.569075	1.28e-35	postive
ACVR1B	ARPP21	0.521936	2.92e-29	postive
ACVR2B	ARPP21	0.612815	1.66e-42	postive
APOBEC3C	ARPP21	-0.506596	2.13e-27	negative
APOBEC3F	ARPP21	-0.565164	4.74e-35	negative
APOBEC3G	ARPP21	-0.531264	1.93e-30	negative
ARAF	ARPP21	-0.50105	9.5e-27	negative
ARRB1	ARPP21	0.521312	3.49e-29	postive
BCL10	ARPP21	-0.57013	9.01e-36	negative
BMP2	ARPP21	0.579105	4.17e-37	postive
BMPR2	ARPP21	0.5949	1.48e-39	postive
BRAF	ARPP21	0.56575	3.9e-35	postive
CALR	ARPP21	-0.61208	2.21e-42	negative
CDC42	ARPP21	-0.547067	1.59e-32	negative
CHGA	ARPP21	0.589172	1.19e-38	postive
CHGB	ARPP21	0.668856	4.46e-53	postive
CKLF	ARPP21	-0.524232	1.51e-29	negative
CMTM3	ARPP21	-0.634357	2.6e-46	negative
CMTM4	ARPP21	0.50534	2.99e-27	postive
CMTM6	ARPP21	-0.524315	1.47e-29	negative
CRHR1	ARPP21	0.637323	7.36e-47	postive
ECD	ARPP21	0.562226	1.25e-34	postive
FCGRT	ARPP21	-0.552812	2.61e-33	negative
FGF12	ARPP21	0.575877	1.27e-36	postive
FGF13	ARPP21	0.643425	5.25e-48	postive
GNAI1	ARPP21	0.587727	1.99e-38	postive
GRN	ARPP21	-0.52024	4.74e-29	negative
GSK3B	ARPP21	0.520121	4.91e-29	postive
HDAC1	ARPP21	-0.615024	6.98e-43	negative
HDGFL3	ARPP21	0.528618	4.21e-30	postive
HFE	ARPP21	-0.547784	1.27e-32	negative
IFNGR2	ARPP21	-0.605954	2.35e-41	negative
IL10RB	ARPP21	-0.569804	1.01e-35	negative
IRF3	ARPP21	-0.510865	6.59e-28	negative
LANCL1	ARPP21	0.506387	2.25e-27	postive
MANF	ARPP21	-0.521037	3.78e-29	negative
MAPK8	ARPP21	0.682718	4.64e-56	postive
MAPT	ARPP21	0.717432	2.61e-64	postive
MDK	ARPP21	-0.519028	6.69e-29	negative
MYDGF	ARPP21	-0.566466	3.07e-35	negative
NR1D2	ARPP21	0.604268	4.48e-41	postive
NR2C2	ARPP21	0.555868	9.83e-34	postive
NRG3	ARPP21	0.581401	1.87e-37	postive
OSMR	ARPP21	-0.50545	2.9e-27	negative
PAK3	ARPP21	0.728916	2.56e-67	postive
PAK5	ARPP21	0.685524	1.1e-56	postive
PDIA3	ARPP21	-0.557746	5.37e-34	negative
PIK3CB	ARPP21	0.580044	3.01e-37	postive
PIK3R1	ARPP21	0.594739	1.57e-39	postive
PPP3CA	ARPP21	0.614984	7.09e-43	postive
PPP3CB	ARPP21	0.698438	1.2e-59	postive
PPP4C	ARPP21	-0.57995	3.11e-37	negative
PRKCA	ARPP21	0.642306	8.56e-48	postive
PRKCB	ARPP21	0.594922	1.47e-39	postive
PSMC2	ARPP21	-0.582334	1.35e-37	negative
PSMC4	ARPP21	-0.521377	3.43e-29	negative
RABEP1	ARPP21	0.548465	1.03e-32	postive
RAC1	ARPP21	-0.515665	1.73e-28	negative
RELB	ARPP21	-0.50143	8.59e-27	negative
RHOA	ARPP21	-0.5405	1.21e-31	negative
S100A11	ARPP21	-0.538477	2.23e-31	negative
S100A16	ARPP21	-0.522959	2.18e-29	negative
S100A6	ARPP21	-0.514364	2.49e-28	negative
SEM1	ARPP21	-0.516567	1.34e-28	negative
SEMA4A	ARPP21	0.512419	4.28e-28	postive
SEMA4G	ARPP21	0.634847	2.11e-46	postive
SEMA6B	ARPP21	0.633975	3.05e-46	postive
SLC22A17	ARPP21	0.61537	6.09e-43	postive
SLIT1	ARPP21	0.563637	7.85e-35	postive
SOS2	ARPP21	0.540853	1.08e-31	postive
SSTR1	ARPP21	0.598929	3.33e-40	postive
SSTR2	ARPP21	0.547338	1.46e-32	postive
THRA	ARPP21	0.606428	1.97e-41	postive
THRB	ARPP21	0.540632	1.16e-31	postive
TMSB10	ARPP21	-0.519343	6.12e-29	negative
TMSB4X	ARPP21	-0.537953	2.61e-31	negative
TNFRSF14	ARPP21	-0.550182	6e-33	negative
TNFRSF1A	ARPP21	-0.629125	2.33e-45	negative
TRIM5	ARPP21	-0.506467	2.2e-27	negative
TXLNA	ARPP21	-0.500774	1.02e-26	negative
UNC93B1	ARPP21	-0.527926	5.16e-30	negative
VIM	ARPP21	-0.609505	6.02e-42	negative
ZYX	ARPP21	-0.503941	4.37e-27	negative
BMP2	ASCC1	0.536281	4.33e-31	postive
BMPR1A	ASCC1	0.558718	3.92e-34	postive
CALCRL	ASCC1	0.619555	1.15e-43	postive
CHUK	ASCC1	0.526934	6.89e-30	postive
ECD	ASCC1	0.561656	1.5e-34	postive
FAM3C	ASCC1	-0.515862	1.64e-28	negative
GPI	ASCC1	-0.503786	4.56e-27	negative
MAPK8	ASCC1	0.591956	4.33e-39	postive
MAPT	ASCC1	0.603731	5.49e-41	postive
SEMA4G	ASCC1	0.604467	4.15e-41	postive
THRA	ASCC1	0.562607	1.1e-34	postive
TNFRSF14	ASCC1	-0.540325	1.27e-31	negative
VAV3	ASCC1	-0.525054	1.19e-29	negative
ZYX	ASCC1	-0.526742	7.28e-30	negative
PLXNB2	ASCC2	0.525992	9.06e-30	postive
IFNAR1	ASCC3	0.598116	4.51e-40	postive
IGF2R	ASCC3	0.525309	1.1e-29	postive
UBR1	ASCC3	0.514927	2.13e-28	postive
ACVR1B	ASIC2	0.546451	1.93e-32	postive
ADRB1	ASIC2	0.605749	2.55e-41	postive
ARRB1	ASIC2	0.62056	7.7e-44	postive
CCK	ASIC2	0.737605	1.06e-69	postive
CHGA	ASIC2	0.685238	1.28e-56	postive
CRHR1	ASIC2	0.63236	6.03e-46	postive
FABP3	ASIC2	0.52658	7.63e-30	postive
FGF13	ASIC2	0.702676	1.18e-60	postive
GREM2	ASIC2	0.689389	1.49e-57	postive
HTR1A	ASIC2	0.530414	2.48e-30	postive
IL34	ASIC2	0.521114	3.7e-29	postive
LANCL1	ASIC2	0.50586	2.6e-27	postive
MAP2K1	ASIC2	0.664994	2.83e-52	postive
OPRL1	ASIC2	0.631971	7.1e-46	postive
PAK1	ASIC2	0.740891	1.26e-70	postive
PAK3	ASIC2	0.67836	4.19e-55	postive
PAK5	ASIC2	0.542154	7.27e-32	postive
PIK3CB	ASIC2	0.51108	6.21e-28	postive
PPP3CA	ASIC2	0.741212	1.02e-70	postive
PPP3CB	ASIC2	0.769625	2.31e-79	postive
PPP3R1	ASIC2	0.736711	1.89e-69	postive
PRKCB	ASIC2	0.794962	3.39e-88	postive
PRKCG	ASIC2	0.778962	1.76e-82	postive
PTGDR2	ASIC2	0.507562	1.63e-27	postive
PTK2B	ASIC2	0.656096	1.8e-50	postive
RBP4	ASIC2	0.669674	3e-53	postive
SEMA4A	ASIC2	0.609362	6.36e-42	postive
SST	ASIC2	0.681099	1.06e-55	postive
THRB	ASIC2	0.783424	5.01e-84	postive
VIP	ASIC2	0.760121	2.45e-76	postive
VIPR1	ASIC2	0.723558	6.77e-66	postive
BIRC5	ASPM	0.54328	5.15e-32	postive
CMTM1	ASPM	0.587017	2.57e-38	postive
CREB1	ASPM	0.541115	1e-31	postive
ELAVL1	ASPM	0.668733	4.73e-53	postive
NFATC3	ASPM	0.531164	1.99e-30	postive
NRAS	ASPM	0.530068	2.75e-30	postive
PSMD11	ASPM	0.601239	1.4e-40	postive
TMSB15A	ASPM	0.528586	4.25e-30	postive
TNFRSF11B	ASS1	0.507696	1.57e-27	postive
BIRC5	ATAD2	0.52702	6.72e-30	postive
CMTM1	ATAD2	0.591388	5.32e-39	postive
CREB1	ATAD2	0.53109	2.03e-30	postive
ELAVL1	ATAD2	0.639031	3.54e-47	postive
PSMD11	ATAD2	0.505857	2.6e-27	postive
ACVR2A	ATF7IP	0.591679	4.79e-39	postive
ACVR2B	ATF7IP	0.706362	1.51e-61	postive
BACH2	ATF7IP	0.531925	1.59e-30	postive
BMPR2	ATF7IP	0.569284	1.2e-35	postive
CALCRL	ATF7IP	0.543069	5.49e-32	postive
CBL	ATF7IP	0.651252	1.63e-49	postive
CMTM1	ATF7IP	0.641906	1.02e-47	postive
CREB1	ATF7IP	0.641573	1.18e-47	postive
GSK3B	ATF7IP	0.658355	6.35e-51	postive
IREB2	ATF7IP	0.510793	6.72e-28	postive
KLRC3	ATF7IP	0.563176	9.13e-35	postive
KLRC4	ATF7IP	0.550181	6e-33	postive
MAPK8	ATF7IP	0.645872	1.79e-48	postive
MAPT	ATF7IP	0.506823	2e-27	postive
NFAT5	ATF7IP	0.54039	1.25e-31	postive
NR2C2	ATF7IP	0.623214	2.63e-44	postive
PAK2	ATF7IP	0.593207	2.75e-39	postive
PIK3CA	ATF7IP	0.515331	1.9e-28	postive
RABEP1	ATF7IP	0.510779	6.75e-28	postive
S100A16	ATF7IP	-0.50041	1.13e-26	negative
SOS1	ATF7IP	0.741567	8.11e-71	postive
SOS2	ATF7IP	0.67542	1.81e-54	postive
TCF7L2	ATF7IP	0.542295	6.97e-32	postive
TNFRSF14	ATF7IP	-0.503826	4.51e-27	negative
TNFSF12	ATF7IP	-0.536531	4.01e-31	negative
UBR1	ATF7IP	0.523896	1.66e-29	postive
APOBEC3C	ATL3	0.558933	3.66e-34	postive
APOBEC3F	ATL3	0.55436	1.59e-33	postive
APOBEC3G	ATL3	0.52631	8.26e-30	postive
BCL10	ATL3	0.576504	1.03e-36	postive
CD74	ATL3	0.513008	3.64e-28	postive
CHGB	ATL3	-0.505166	3.14e-27	negative
CMTM6	ATL3	0.510123	8.09e-28	postive
CYBB	ATL3	0.514115	2.67e-28	postive
ERAP1	ATL3	0.509087	1.08e-27	postive
HFE	ATL3	0.575225	1.59e-36	postive
HLA-DMA	ATL3	0.501552	8.31e-27	postive
IL13RA1	ATL3	0.534082	8.36e-31	postive
LIMS1	ATL3	0.509664	9.18e-28	postive
LTBP1	ATL3	0.513967	2.78e-28	postive
LYN	ATL3	0.523828	1.7e-29	postive
MAPT	ATL3	-0.502844	5.87e-27	negative
MR1	ATL3	0.599918	2.3e-40	postive
NFATC2	ATL3	0.503895	4.42e-27	postive
NFKB1	ATL3	0.549601	7.2e-33	postive
OSMR	ATL3	0.566601	2.94e-35	postive
PLSCR1	ATL3	0.507805	1.53e-27	postive
S100A10	ATL3	0.520411	4.52e-29	postive
S100A11	ATL3	0.508342	1.32e-27	postive
SEMA6B	ATL3	-0.508299	1.33e-27	negative
SLC22A17	ATL3	-0.52696	6.83e-30	negative
STAT3	ATL3	0.543607	4.65e-32	postive
TANK	ATL3	0.538332	2.33e-31	postive
TLR1	ATL3	0.535046	6.27e-31	postive
TNC	ATL3	0.591603	4.92e-39	postive
TNFRSF1A	ATL3	0.561783	1.44e-34	postive
TRIM5	ATL3	0.516641	1.32e-28	postive
TXLNA	ATL3	0.507468	1.68e-27	postive
VIM	ATL3	0.594294	1.85e-39	postive
AKT1	ATP13A1	0.513802	2.91e-28	postive
ELAVL1	ATP13A1	0.509943	8.5e-28	postive
MAP2K2	ATP13A1	0.532638	1.29e-30	postive
NR2F6	ATP13A1	0.603544	5.89e-41	postive
OGFR	ATP13A1	0.553902	1.84e-33	postive
RABEP2	ATP13A1	0.517901	9.21e-29	postive
S1PR2	ATP13A1	0.526808	7.15e-30	postive
SKIV2L	ATP13A1	0.559479	3.06e-34	postive
TYK2	ATP13A1	0.676817	9.04e-55	postive
GPI	ATP1A1	0.556567	7.85e-34	postive
OSMR	ATP1A1	0.514945	2.12e-28	postive
PTK2B	ATP1A1	0.556602	7.76e-34	postive
TNC	ATP1A1	0.513398	3.26e-28	postive
ACVR1B	ATP2A2	0.648061	6.79e-49	postive
BMPR2	ATP2A2	0.645583	2.04e-48	postive
BRAF	ATP2A2	0.61521	6.48e-43	postive
CBL	ATP2A2	0.557711	5.43e-34	postive
ESRRG	ATP2A2	0.508556	1.24e-27	postive
GMFG	ATP2A2	-0.502993	5.64e-27	negative
GSK3B	ATP2A2	0.667276	9.52e-53	postive
HCST	ATP2A2	-0.514117	2.67e-28	negative
MAPK1	ATP2A2	0.573344	3.03e-36	postive
NENF	ATP2A2	-0.509382	9.92e-28	negative
NFAT5	ATP2A2	0.618385	1.84e-43	postive
NR2C2	ATP2A2	0.623066	2.8e-44	postive
PAK3	ATP2A2	0.592218	3.94e-39	postive
PIK3CB	ATP2A2	0.508581	1.24e-27	postive
PRKCA	ATP2A2	0.512613	4.06e-28	postive
RABEP1	ATP2A2	0.506945	1.93e-27	postive
SEM1	ATP2A2	-0.542279	7e-32	negative
SOS1	ATP2A2	0.511847	5.02e-28	postive
SOS2	ATP2A2	0.517385	1.07e-28	postive
TNFSF12	ATP2A2	-0.539279	1.75e-31	negative
UBR1	ATP2A2	0.567846	1.94e-35	postive
ACVR1B	ATP6V1A	0.572816	3.63e-36	postive
ARRB1	ATP6V1A	0.61663	3.7e-43	postive
BMPR2	ATP6V1A	0.633576	3.61e-46	postive
BRAF	ATP6V1A	0.573816	2.58e-36	postive
CCK	ATP6V1A	0.657026	1.17e-50	postive
CHGA	ATP6V1A	0.660776	2.06e-51	postive
CHGB	ATP6V1A	0.501787	7.8e-27	postive
CMTM3	ATP6V1A	-0.517949	9.09e-29	negative
CRHR1	ATP6V1A	0.573587	2.79e-36	postive
FGF13	ATP6V1A	0.703661	6.82e-61	postive
FGF9	ATP6V1A	0.510396	7.5e-28	postive
GREM2	ATP6V1A	0.746515	3.05e-72	postive
GSK3B	ATP6V1A	0.561327	1.68e-34	postive
HTR1A	ATP6V1A	0.553151	2.34e-33	postive
LANCL1	ATP6V1A	0.571777	5.16e-36	postive
MAP2K1	ATP6V1A	0.700426	4.05e-60	postive
MAPK1	ATP6V1A	0.566385	3.16e-35	postive
MAPK8	ATP6V1A	0.500552	1.09e-26	postive
NFAT5	ATP6V1A	0.527113	6.54e-30	postive
NR1D2	ATP6V1A	0.570245	8.67e-36	postive
OPRL1	ATP6V1A	0.580151	2.9e-37	postive
PAK1	ATP6V1A	0.677552	6.27e-55	postive
PAK3	ATP6V1A	0.773604	1.13e-80	postive
PAK5	ATP6V1A	0.644318	3.55e-48	postive
PIK3CB	ATP6V1A	0.703514	7.4e-61	postive
PPP3CA	ATP6V1A	0.771759	4.61e-80	postive
PPP3CB	ATP6V1A	0.820819	1.35e-98	postive
PPP3R1	ATP6V1A	0.751533	1.01e-73	postive
PRKCB	ATP6V1A	0.773896	9.02e-81	postive
PRKCG	ATP6V1A	0.650672	2.11e-49	postive
PTK2B	ATP6V1A	0.533421	1.02e-30	postive
RABEP1	ATP6V1A	0.516597	1.33e-28	postive
RBP4	ATP6V1A	0.582041	1.5e-37	postive
SEMA4A	ATP6V1A	0.629657	1.86e-45	postive
SST	ATP6V1A	0.512521	4.16e-28	postive
THRB	ATP6V1A	0.785513	9.21e-85	postive
VIP	ATP6V1A	0.695332	6.39e-59	postive
VIPR1	ATP6V1A	0.648096	6.69e-49	postive
NFAT5	ATXN1	0.541991	7.65e-32	postive
CMTM1	BAZ1A	0.559834	2.73e-34	postive
CREB1	BAZ1A	0.571727	5.25e-36	postive
IREB2	BAZ1A	0.557838	5.21e-34	postive
RAF1	BAZ1A	0.542007	7.61e-32	postive
SOS1	BAZ1A	0.500093	1.23e-26	postive
SP1	BAZ1A	0.500429	1.12e-26	postive
TRIM27	BAZ1A	0.579956	3.1e-37	postive
CREB1	BAZ1B	0.584208	6.97e-38	postive
NFATC3	BAZ1B	0.597976	4.75e-40	postive
SP1	BAZ1B	0.531987	1.56e-30	postive
ZC3HAV1	BAZ1B	0.56903	1.3e-35	postive
ACVR2B	BCCIP	0.518108	8.69e-29	postive
APOBEC3F	BCCIP	-0.526148	8.66e-30	negative
BMP2	BCCIP	0.61234	2e-42	postive
CHGB	BCCIP	0.518332	8.16e-29	postive
CTF1	BCCIP	-0.513159	3.49e-28	negative
ECD	BCCIP	0.607965	1.09e-41	postive
GDNF	BCCIP	0.562478	1.15e-34	postive
HFE	BCCIP	-0.529752	3.02e-30	negative
MAPK8	BCCIP	0.554754	1.41e-33	postive
MAPT	BCCIP	0.540202	1.32e-31	postive
SEMA4G	BCCIP	0.654419	3.88e-50	postive
TNFRSF1A	BCCIP	-0.52823	4.72e-30	negative
ACVRL1	BCL6B	0.636067	1.26e-46	postive
CETP	BCL6B	0.632636	5.37e-46	postive
CYSLTR2	BCL6B	0.56619	3.37e-35	postive
DLL4	BCL6B	0.764133	1.35e-77	postive
ENG	BCL6B	0.529568	3.18e-30	postive
FLT1	BCL6B	0.586075	3.59e-38	postive
FLT4	BCL6B	0.692703	2.6e-58	postive
GPER1	BCL6B	0.532987	1.16e-30	postive
ICAM2	BCL6B	0.596719	7.56e-40	postive
KDR	BCL6B	0.717012	3.34e-64	postive
NOX4	BCL6B	0.542063	7.48e-32	postive
PDGFB	BCL6B	0.588175	1.7e-38	postive
PDGFRB	BCL6B	0.53981	1.49e-31	postive
TIE1	BCL6B	0.654507	3.72e-50	postive
TNFRSF4	BCL6B	0.544564	3.46e-32	postive
BRD8	BCLAF3	0.506052	2.47e-27	postive
CREB1	BCLAF3	0.51124	5.94e-28	postive
DDX17	BCLAF3	0.584816	5.62e-38	postive
NR2C1	BCLAF3	0.568776	1.42e-35	postive
NR2C2	BCLAF3	0.574197	2.27e-36	postive
SOS1	BCLAF3	0.612101	2.2e-42	postive
PTN	BLM	0.537159	3.32e-31	postive
ADRM1	BRAT1	0.526045	8.92e-30	postive
FLT3LG	BRAT1	0.503838	4.49e-27	postive
IRF3	BRAT1	0.503601	4.79e-27	postive
OGFR	BRAT1	0.601	1.54e-40	postive
RABEP2	BRAT1	0.559972	2.61e-34	postive
SKIV2L	BRAT1	0.514863	2.17e-28	postive
TYK2	BRAT1	0.525385	1.08e-29	postive
ELAVL1	BRCA1	0.549199	8.17e-33	postive
NFATC3	BRCA1	0.544666	3.36e-32	postive
PSMD11	BRCA1	0.55108	4.52e-33	postive
TXLNA	BRCA1	0.518834	7.07e-29	postive
BIRC5	BRIX1	0.543126	5.4e-32	postive
DAXX	BRIX1	0.560401	2.27e-34	postive
ELAVL1	BRIX1	0.505666	2.74e-27	postive
HMGB1	BRIX1	0.507292	1.76e-27	postive
MANF	BRIX1	0.502521	6.41e-27	postive
NR3C2	BRIX1	-0.509485	9.64e-28	negative
NRAS	BRIX1	0.581793	1.63e-37	postive
NRG3	BRIX1	-0.521905	2.95e-29	negative
PSMD11	BRIX1	0.536715	3.8e-31	postive
PSMD14	BRIX1	0.579255	3.96e-37	postive
B2M	BTN3A3	0.531898	1.6e-30	postive
CIITA	BTN3A3	0.666999	1.09e-52	postive
DKK1	BTN3A3	0.510481	7.33e-28	postive
GBP2	BTN3A3	0.619389	1.23e-43	postive
HLA-A	BTN3A3	0.557291	6.22e-34	postive
HLA-B	BTN3A3	0.732959	2.05e-68	postive
HLA-C	BTN3A3	0.680325	1.56e-55	postive
HLA-DOA	BTN3A3	0.588973	1.27e-38	postive
HLA-DOB	BTN3A3	0.723478	7.11e-66	postive
HLA-DPA1	BTN3A3	0.610973	3.41e-42	postive
HLA-DQA2	BTN3A3	0.602728	8.02e-41	postive
HLA-E	BTN3A3	0.633993	3.03e-46	postive
HLA-F	BTN3A3	0.662259	1.03e-51	postive
HLA-G	BTN3A3	0.64544	2.17e-48	postive
IDO1	BTN3A3	0.66917	3.83e-53	postive
IFIH1	BTN3A3	0.524711	1.31e-29	postive
IRF1	BTN3A3	0.555218	1.21e-33	postive
PSMB8	BTN3A3	0.500262	1.17e-26	postive
STAT1	BTN3A3	0.579155	4.1e-37	postive
TAP1	BTN3A3	0.649804	3.12e-49	postive
TAP2	BTN3A3	0.752551	5.02e-74	postive
TLR3	BTN3A3	0.50234	6.73e-27	postive
TNFSF13B	BTN3A3	0.704146	5.21e-61	postive
TRIM22	BTN3A3	0.500653	1.06e-26	postive
DAXX	BUD13	0.623413	2.43e-44	postive
EED	BUD13	0.520782	4.06e-29	postive
HDGF	BUD13	0.577149	8.22e-37	postive
PSMD3	BUD13	0.590763	6.68e-39	postive
TRIM27	BUD13	0.587457	2.19e-38	postive
ADRM1	BUD23	0.577681	6.84e-37	postive
ARRB1	BUD23	-0.528303	4.62e-30	negative
CD320	BUD23	0.528288	4.64e-30	postive
CMTM3	BUD23	0.502303	6.79e-27	postive
CMTM4	BUD23	-0.519752	5.45e-29	negative
MANF	BUD23	0.538343	2.32e-31	postive
MDK	BUD23	0.526822	7.12e-30	postive
MYDGF	BUD23	0.522266	2.66e-29	postive
NRG3	BUD23	-0.565301	4.53e-35	negative
PIK3CB	BUD23	-0.524649	1.34e-29	negative
PPARA	BUD23	-0.521727	3.1e-29	negative
PPIA	BUD23	0.539295	1.74e-31	postive
PPP4C	BUD23	0.57604	1.2e-36	postive
PSMC2	BUD23	0.582827	1.13e-37	postive
PSMC4	BUD23	0.522205	2.7e-29	postive
RAC1	BUD23	0.544314	3.74e-32	postive
SEM1	BUD23	0.698215	1.35e-59	postive
MAPK14	BYSL	0.837164	4.42e-106	postive
APOBEC3G	BZW1	0.50173	7.92e-27	postive
BCL10	BZW1	0.601754	1.16e-40	postive
BIRC5	BZW1	0.553888	1.85e-33	postive
CALR	BZW1	0.586339	3.27e-38	postive
CANX	BZW1	0.52601	9.01e-30	postive
CASP3	BZW1	0.69276	2.52e-58	postive
CDC42	BZW1	0.804791	5.77e-92	postive
CKLF	BZW1	0.610253	4.51e-42	postive
CMTM3	BZW1	0.516317	1.44e-28	postive
CMTM6	BZW1	0.687927	3.18e-57	postive
CRLF3	BZW1	0.535142	6.09e-31	postive
DCK	BZW1	0.540805	1.1e-31	postive
FABP7	BZW1	0.606369	2.01e-41	postive
FAM3C	BZW1	0.663182	6.67e-52	postive
HDAC1	BZW1	0.539153	1.82e-31	postive
HFE	BZW1	0.619055	1.41e-43	postive
HSPA5	BZW1	0.53788	2.67e-31	postive
IFNAR2	BZW1	0.522728	2.33e-29	postive
IFNGR2	BZW1	0.686316	7.34e-57	postive
IL1RAP	BZW1	0.524272	1.49e-29	postive
LIMS1	BZW1	0.565298	4.53e-35	postive
LRSAM1	BZW1	-0.536536	4.01e-31	negative
MANF	BZW1	0.509304	1.01e-27	postive
MAPT	BZW1	-0.603341	6.36e-41	negative
MDK	BZW1	0.568599	1.51e-35	postive
MYDGF	BZW1	0.564929	5.12e-35	postive
NAMPT	BZW1	0.524899	1.24e-29	postive
NCK1	BZW1	0.649159	4.16e-49	postive
NOX4	BZW1	0.617722	2.4e-43	postive
NRAS	BZW1	0.761589	8.53e-77	postive
NRG3	BZW1	-0.563499	8.21e-35	negative
PDK1	BZW1	0.524548	1.38e-29	postive
PLSCR1	BZW1	0.528948	3.82e-30	postive
PPIA	BZW1	0.736438	2.25e-69	postive
PPP4C	BZW1	0.599991	2.24e-40	postive
PSMC1	BZW1	0.751055	1.4e-73	postive
PSMC2	BZW1	0.788682	6.8e-86	postive
PSMC4	BZW1	0.602377	9.15e-41	postive
PSMC6	BZW1	0.549269	7.99e-33	postive
PSMD10	BZW1	0.52843	4.45e-30	postive
PSMD14	BZW1	0.767686	9.82e-79	postive
PSMD5	BZW1	0.551792	3.61e-33	postive
PSMD6	BZW1	0.586256	3.37e-38	postive
PSMD8	BZW1	0.66766	7.92e-53	postive
PSME3	BZW1	0.595496	1.19e-39	postive
PTN	BZW1	0.528746	4.05e-30	postive
RAC1	BZW1	0.586417	3.18e-38	postive
RBP1	BZW1	0.508294	1.34e-27	postive
RHOA	BZW1	0.623712	2.15e-44	postive
S100A16	BZW1	0.554831	1.37e-33	postive
SEMA4G	BZW1	-0.532056	1.53e-30	negative
SHC2	BZW1	-0.511991	4.82e-28	negative
SLC22A17	BZW1	-0.5532	2.31e-33	negative
TANK	BZW1	0.663483	5.78e-52	postive
TFRC	BZW1	0.513404	3.26e-28	postive
THRA	BZW1	-0.612373	1.98e-42	negative
TMSB10	BZW1	0.593374	2.58e-39	postive
TMSB4X	BZW1	0.627373	4.8e-45	postive
TNFRSF12A	BZW1	0.578019	6.08e-37	postive
TNFRSF19	BZW1	0.552836	2.59e-33	postive
TNFRSF1A	BZW1	0.55037	5.65e-33	postive
ULBP3	BZW1	0.52888	3.9e-30	postive
VIM	BZW1	0.504642	3.62e-27	postive
ZYX	BZW1	0.536883	3.61e-31	postive
BRD8	C12orf65	0.500537	1.09e-26	postive
BIRC5	C18orf21	0.518179	8.52e-29	postive
CDC42	C18orf21	0.541287	9.48e-32	postive
CKLF	C18orf21	0.576796	9.28e-37	postive
MYDGF	C18orf21	0.503509	4.91e-27	postive
PPIA	C18orf21	0.528322	4.59e-30	postive
PPP4C	C18orf21	0.592914	3.06e-39	postive
PSMC6	C18orf21	0.524088	1.57e-29	postive
PSMD14	C18orf21	0.590725	6.77e-39	postive
PSMD8	C18orf21	0.559484	3.06e-34	postive
TMSB10	C18orf21	0.518824	7.09e-29	postive
ADRM1	C1orf35	0.501313	8.86e-27	postive
AGER	C1orf35	0.529434	3.31e-30	postive
HRAS	C1orf35	0.564633	5.65e-35	postive
JUND	C1orf35	0.504014	4.28e-27	postive
NR2F6	C1orf35	0.509077	1.08e-27	postive
OGFR	C1orf35	0.556561	7.87e-34	postive
PSMC5	C1orf35	0.597212	6.3e-40	postive
PSMD4	C1orf35	0.653109	7.03e-50	postive
PSPN	C1orf35	0.52031	4.65e-29	postive
RFXANK	C1orf35	0.504104	4.18e-27	postive
ROBO3	C1orf35	0.543248	5.2e-32	postive
SHC2	C1orf35	0.502276	6.84e-27	postive
SKIV2L	C1orf35	0.511111	6.16e-28	postive
TOR2A	C1orf35	0.512692	3.97e-28	postive
UBXN1	C1orf35	0.562159	1.28e-34	postive
UCN	C1orf35	0.652559	9.02e-50	postive
VEGFB	C1orf35	0.521892	2.96e-29	postive
APOBEC3C	CALD1	0.578152	5.81e-37	postive
APOBEC3F	CALD1	0.571016	6.68e-36	postive
APOBEC3G	CALD1	0.520213	4.78e-29	postive
BCL10	CALD1	0.614108	1e-42	postive
BCL3	CALD1	0.60528	3.05e-41	postive
BMP1	CALD1	0.611415	2.87e-42	postive
CALR	CALD1	0.57413	2.32e-36	postive
CASP3	CALD1	0.52079	4.05e-29	postive
CD40	CALD1	0.50677	2.03e-27	postive
CMTM3	CALD1	0.515671	1.73e-28	postive
CMTM6	CALD1	0.563765	7.52e-35	postive
CXCR4	CALD1	0.500445	1.12e-26	postive
ENG	CALD1	0.575934	1.25e-36	postive
FAM3C	CALD1	0.514789	2.21e-28	postive
FURIN	CALD1	0.548504	1.02e-32	postive
GRN	CALD1	0.510111	8.11e-28	postive
HDAC1	CALD1	0.508333	1.32e-27	postive
HFE	CALD1	0.544629	3.39e-32	postive
HSPA5	CALD1	0.593197	2.76e-39	postive
ICAM1	CALD1	0.53369	9.4e-31	postive
IFNGR2	CALD1	0.565322	4.5e-35	postive
IL10RB	CALD1	0.531393	1.86e-30	postive
IL4R	CALD1	0.514488	2.41e-28	postive
LIMS1	CALD1	0.619007	1.43e-43	postive
LTBP2	CALD1	0.507585	1.62e-27	postive
MALT1	CALD1	0.519798	5.38e-29	postive
MAPT	CALD1	-0.568718	1.45e-35	negative
MDK	CALD1	0.570378	8.29e-36	postive
NFKB1	CALD1	0.571898	4.96e-36	postive
NFKBIZ	CALD1	0.556235	8.74e-34	postive
NOX4	CALD1	0.571482	5.71e-36	postive
NRP1	CALD1	0.687934	3.17e-57	postive
OSMR	CALD1	0.637468	6.91e-47	postive
PDGFRB	CALD1	0.599025	3.21e-40	postive
PDIA3	CALD1	0.629233	2.22e-45	postive
PLAU	CALD1	0.600837	1.63e-40	postive
PLAUR	CALD1	0.601221	1.41e-40	postive
PLXND1	CALD1	0.576049	1.2e-36	postive
PROCR	CALD1	0.538513	2.21e-31	postive
PSMC2	CALD1	0.572932	3.49e-36	postive
PTGER4	CALD1	0.563862	7.29e-35	postive
RAC2	CALD1	0.526634	7.51e-30	postive
RELB	CALD1	0.535622	5.28e-31	postive
S100A11	CALD1	0.56542	4.35e-35	postive
SDC1	CALD1	0.508547	1.25e-27	postive
SDC2	CALD1	0.530687	2.29e-30	postive
SEMA3F	CALD1	0.523165	2.05e-29	postive
SHC1	CALD1	0.668061	6.53e-53	postive
SLC22A17	CALD1	-0.540726	1.13e-31	negative
TGFB1	CALD1	0.562507	1.14e-34	postive
TGFBR2	CALD1	0.504362	3.9e-27	postive
THBS1	CALD1	0.557785	5.3e-34	postive
THRA	CALD1	-0.563303	8.76e-35	negative
TNC	CALD1	0.550789	4.95e-33	postive
TNFAIP3	CALD1	0.517663	9.86e-29	postive
TNFRSF14	CALD1	0.516508	1.37e-28	postive
TNFRSF1A	CALD1	0.532531	1.33e-30	postive
TPM2	CALD1	0.613874	1.1e-42	postive
TRIM5	CALD1	0.515321	1.91e-28	postive
TXLNA	CALD1	0.518532	7.71e-29	postive
ULBP3	CALD1	0.545306	2.75e-32	postive
VEGFC	CALD1	0.54463	3.39e-32	postive
VIM	CALD1	0.54751	1.39e-32	postive
ZYX	CALD1	0.542268	7.02e-32	postive
ACVR1B	CALM3	0.504399	3.86e-27	postive
ADRB1	CALM3	0.623757	2.11e-44	postive
ARRB1	CALM3	0.569349	1.17e-35	postive
CCK	CALM3	0.858487	3.39e-117	postive
CHGA	CALM3	0.678976	3.08e-55	postive
CRHR1	CALM3	0.654043	4.6e-50	postive
FABP3	CALM3	0.612152	2.15e-42	postive
FGF13	CALM3	0.620164	9.02e-44	postive
FGF9	CALM3	0.510441	7.41e-28	postive
GREM2	CALM3	0.678703	3.53e-55	postive
IL34	CALM3	0.531072	2.04e-30	postive
MAP2K1	CALM3	0.713365	2.8e-63	postive
MAPK3	CALM3	0.541295	9.46e-32	postive
OPRL1	CALM3	0.732974	2.03e-68	postive
PAK1	CALM3	0.84338	3.78e-109	postive
PAK3	CALM3	0.626404	7.15e-45	postive
PAK5	CALM3	0.571281	6.11e-36	postive
PPP3CA	CALM3	0.774384	6.2e-81	postive
PPP3CB	CALM3	0.810271	3.67e-94	postive
PPP3R1	CALM3	0.863446	4.8e-120	postive
PRKCB	CALM3	0.828403	5.69e-102	postive
PRKCG	CALM3	0.882481	4.05e-132	postive
PTGDR2	CALM3	0.544579	3.45e-32	postive
PTK2B	CALM3	0.664103	4.31e-52	postive
RBP4	CALM3	0.767698	9.73e-79	postive
SEMA4A	CALM3	0.575803	1.31e-36	postive
SST	CALM3	0.698895	9.34e-60	postive
THRB	CALM3	0.78904	5.05e-86	postive
VIP	CALM3	0.850009	1.43e-112	postive
VIPR1	CALM3	0.792544	2.67e-87	postive
ACTG1	CALR	0.611396	2.89e-42	postive
ACVR2B	CALR	-0.558911	3.68e-34	negative
ADM	CALR	0.505247	3.07e-27	postive
ADRM1	CALR	0.543436	4.91e-32	postive
APOBEC3C	CALR	0.546841	1.71e-32	postive
APOBEC3F	CALR	0.571531	5.61e-36	postive
APOBEC3G	CALR	0.552982	2.47e-33	postive
ARAF	CALR	0.563692	7.71e-35	postive
ARRB1	CALR	-0.508885	1.14e-27	negative
B2M	CALR	0.536092	4.58e-31	postive
BCL10	CALR	0.546838	1.71e-32	postive
BCL3	CALR	0.633257	4.13e-46	postive
BMPR2	CALR	-0.517477	1.04e-28	negative
BRAF	CALR	-0.501789	7.8e-27	negative
CALR	CALR	1	0	postive
CASP3	CALR	0.528817	3.97e-30	postive
CD320	CALR	0.561633	1.52e-34	postive
CDC42	CALR	0.54891	8.95e-33	postive
CDNF	CALR	-0.529654	3.11e-30	negative
CKLF	CALR	0.503519	4.9e-27	postive
CMTM3	CALR	0.626484	6.92e-45	postive
CMTM4	CALR	-0.617739	2.38e-43	negative
CMTM6	CALR	0.517317	1.09e-28	postive
ENG	CALR	0.513342	3.31e-28	postive
FAM3C	CALR	0.556686	7.56e-34	postive
FCGRT	CALR	0.534221	8.02e-31	postive
GDF15	CALR	0.528279	4.65e-30	postive
GNAI1	CALR	-0.537385	3.1e-31	negative
GRN	CALR	0.554219	1.67e-33	postive
HDAC1	CALR	0.515815	1.66e-28	postive
HDGFL3	CALR	-0.501635	8.13e-27	negative
HFE	CALR	0.549858	6.64e-33	postive
HLA-A	CALR	0.62462	1.49e-44	postive
HLA-B	CALR	0.544172	3.91e-32	postive
HSPA5	CALR	0.741367	9.25e-71	postive
IFNGR2	CALR	0.72999	1.31e-67	postive
IL10RB	CALR	0.639159	3.35e-47	postive
IL17RC	CALR	0.508873	1.14e-27	postive
IRF1	CALR	0.513367	3.29e-28	postive
ISG20	CALR	0.530524	2.4e-30	postive
LANCL1	CALR	-0.565556	4.16e-35	negative
LIMS1	CALR	0.533354	1.04e-30	postive
MANF	CALR	0.773238	1.49e-80	postive
MAPK8	CALR	-0.607984	1.08e-41	negative
MAPT	CALR	-0.682867	4.31e-56	negative
MDK	CALR	0.656726	1.35e-50	postive
MICA	CALR	0.510368	7.56e-28	postive
MYDGF	CALR	0.775412	2.81e-81	postive
NAMPT	CALR	0.525146	1.16e-29	postive
NOX4	CALR	0.581237	1.98e-37	postive
NR1D2	CALR	-0.559101	3.46e-34	negative
NR2F6	CALR	0.509764	8.93e-28	postive
NRG3	CALR	-0.573623	2.76e-36	negative
NRP1	CALR	0.634003	3.02e-46	postive
OSMR	CALR	0.618447	1.79e-43	postive
PAK3	CALR	-0.513177	3.47e-28	negative
PAK5	CALR	-0.520383	4.55e-29	negative
PDIA3	CALR	0.758288	9.05e-76	postive
PIK3CB	CALR	-0.539058	1.87e-31	negative
PIK3R1	CALR	-0.50937	9.95e-28	negative
PLSCR1	CALR	0.55393	1.83e-33	postive
PLXNB1	CALR	-0.535068	6.23e-31	negative
PPARA	CALR	-0.541935	7.78e-32	negative
PPIA	CALR	0.630665	1.23e-45	postive
PPP3CB	CALR	-0.526683	7.41e-30	negative
PPP4C	CALR	0.591833	4.53e-39	postive
PRKCA	CALR	-0.525947	9.18e-30	negative
PROCR	CALR	0.514481	2.41e-28	postive
PSMB8	CALR	0.600646	1.75e-40	postive
PSMC1	CALR	0.556038	9.31e-34	postive
PSMC2	CALR	0.608252	9.76e-42	postive
PSMC4	CALR	0.59247	3.59e-39	postive
PSMD14	CALR	0.517775	9.55e-29	postive
PSMD8	CALR	0.614293	9.31e-43	postive
PSME1	CALR	0.504275	3.99e-27	postive
PSME2	CALR	0.564454	5.99e-35	postive
PTPN11	CALR	-0.535656	5.22e-31	negative
RABEP1	CALR	-0.611135	3.2e-42	negative
RAC2	CALR	0.537454	3.04e-31	postive
RELB	CALR	0.584728	5.8e-38	postive
RHOA	CALR	0.515673	1.73e-28	postive
S100A10	CALR	0.52777	5.4e-30	postive
S100A11	CALR	0.666134	1.64e-52	postive
S100A16	CALR	0.612247	2.07e-42	postive
S100A6	CALR	0.545859	2.32e-32	postive
SDC1	CALR	0.501302	8.89e-27	postive
SECTM1	CALR	0.530794	2.22e-30	postive
SEMA3F	CALR	0.512895	3.75e-28	postive
SHC1	CALR	0.576074	1.19e-36	postive
SOCS1	CALR	0.590704	6.82e-39	postive
SOS2	CALR	-0.510528	7.23e-28	negative
TGFB1	CALR	0.50419	4.09e-27	postive
THRA	CALR	-0.677049	8.06e-55	negative
TMSB10	CALR	0.644702	3e-48	postive
TMSB4X	CALR	0.551773	3.63e-33	postive
TNC	CALR	0.514829	2.19e-28	postive
TNFRSF12A	CALR	0.614832	7.53e-43	postive
TNFRSF1A	CALR	0.723	9.48e-66	postive
ULBP3	CALR	0.549641	7.11e-33	postive
UNC93B1	CALR	0.50334	5.14e-27	postive
VIM	CALR	0.676096	1.29e-54	postive
ZYX	CALR	0.657629	8.89e-51	postive
APOBEC3C	CALU	0.51521	1.97e-28	postive
BCL10	CALU	0.541531	8.8e-32	postive
BCL3	CALU	0.508583	1.23e-27	postive
BMP1	CALU	0.518507	7.76e-29	postive
CALR	CALU	0.559797	2.76e-34	postive
CMTM6	CALU	0.523078	2.1e-29	postive
HSPA5	CALU	0.531646	1.73e-30	postive
IFNGR2	CALU	0.554026	1.77e-33	postive
LIMS1	CALU	0.58072	2.38e-37	postive
MDK	CALU	0.522684	2.36e-29	postive
NRP1	CALU	0.59442	1.76e-39	postive
OSMR	CALU	0.563352	8.62e-35	postive
PDIA3	CALU	0.55862	4.05e-34	postive
PLAUR	CALU	0.505021	3.26e-27	postive
PSMC1	CALU	0.508515	1.26e-27	postive
PSMC2	CALU	0.571945	4.88e-36	postive
S100A11	CALU	0.522377	2.57e-29	postive
SDC1	CALU	0.581615	1.74e-37	postive
SHC1	CALU	0.603618	5.73e-41	postive
TGFB1	CALU	0.503372	5.09e-27	postive
THRA	CALU	-0.524699	1.32e-29	negative
ULBP3	CALU	0.521733	3.1e-29	postive
VIM	CALU	0.51759	1.01e-28	postive
AP3B1	CANX	0.581611	1.74e-37	postive
CANX	CANX	1	0	postive
ERAP1	CANX	0.504176	4.1e-27	postive
HSPA4	CANX	0.546241	2.06e-32	postive
HSPA5	CANX	0.530963	2.11e-30	postive
IL6ST	CANX	0.503074	5.52e-27	postive
STAT3	CANX	0.532435	1.37e-30	postive
TRIM5	CANX	0.525356	1.09e-29	postive
ZC3HAV1	CANX	0.52042	4.51e-29	postive
ACVR2B	CAPG	-0.6349	2.06e-46	negative
ADA2	CAPG	0.610008	4.95e-42	postive
ANGPTL6	CAPG	0.605719	2.58e-41	postive
APOBEC3C	CAPG	0.662041	1.14e-51	postive
APOBEC3F	CAPG	0.687323	4.36e-57	postive
APOBEC3G	CAPG	0.705818	2.05e-61	postive
B2M	CAPG	0.600752	1.69e-40	postive
BCL3	CAPG	0.549861	6.64e-33	postive
BMP2	CAPG	-0.532418	1.37e-30	negative
BMPR2	CAPG	-0.541053	1.02e-31	negative
BTK	CAPG	0.686711	5.98e-57	postive
C3	CAPG	0.543601	4.66e-32	postive
C3AR1	CAPG	0.546656	1.81e-32	postive
C5AR1	CAPG	0.532649	1.28e-30	postive
CALR	CAPG	0.523206	2.03e-29	postive
CCL5	CAPG	0.51937	6.07e-29	postive
CCR5	CAPG	0.566774	2.77e-35	postive
CCRL2	CAPG	0.679443	2.43e-55	postive
CD14	CAPG	0.578956	4.39e-37	postive
CD3D	CAPG	0.531521	1.79e-30	postive
CD4	CAPG	0.57146	5.75e-36	postive
CD40	CAPG	0.623168	2.68e-44	postive
CD48	CAPG	0.664204	4.11e-52	postive
CD74	CAPG	0.657372	1e-50	postive
CD86	CAPG	0.64369	4.68e-48	postive
CDC42	CAPG	0.501997	7.37e-27	postive
CKLF	CAPG	0.586357	3.25e-38	postive
CMTM3	CAPG	0.565131	4.79e-35	postive
CMTM6	CAPG	0.536084	4.59e-31	postive
CMTM7	CAPG	0.627551	4.46e-45	postive
CSF3R	CAPG	0.536311	4.29e-31	postive
CTF1	CAPG	0.604322	4.38e-41	postive
CTSB	CAPG	0.574926	1.77e-36	postive
CTSL	CAPG	0.505753	2.67e-27	postive
CTSS	CAPG	0.596736	7.51e-40	postive
CXCL16	CAPG	0.690455	8.5e-58	postive
CXCR4	CAPG	0.564769	5.4e-35	postive
CYBB	CAPG	0.504152	4.13e-27	postive
FAS	CAPG	0.549342	7.81e-33	postive
FCER1G	CAPG	0.735796	3.39e-69	postive
FCGR2B	CAPG	0.540379	1.25e-31	postive
FCGR3A	CAPG	0.620033	9.51e-44	postive
FCGRT	CAPG	0.64653	1.34e-48	postive
FGF12	CAPG	-0.500868	9.98e-27	negative
FGR	CAPG	0.612268	2.06e-42	postive
FPR1	CAPG	0.550314	5.75e-33	postive
GMFG	CAPG	0.627074	5.43e-45	postive
GRN	CAPG	0.708654	4.15e-62	postive
GSK3B	CAPG	-0.548079	1.16e-32	negative
HCK	CAPG	0.609639	5.72e-42	postive
HCST	CAPG	0.67054	1.97e-53	postive
HDGFL3	CAPG	-0.581919	1.56e-37	negative
HFE	CAPG	0.645856	1.81e-48	postive
HLA-DMA	CAPG	0.692279	3.25e-58	postive
HLA-DMB	CAPG	0.653515	5.85e-50	postive
HLA-DPA1	CAPG	0.525698	9.87e-30	postive
HLA-DPB1	CAPG	0.589696	9.82e-39	postive
HLA-DQB1	CAPG	0.582787	1.15e-37	postive
HLA-DRA	CAPG	0.597288	6.13e-40	postive
HLA-DRB1	CAPG	0.598612	3.75e-40	postive
HLA-DRB5	CAPG	0.505211	3.1e-27	postive
HLA-E	CAPG	0.535663	5.21e-31	postive
IFNGR2	CAPG	0.64876	4.97e-49	postive
IKBKE	CAPG	0.526323	8.23e-30	postive
IL10RB	CAPG	0.662455	9.38e-52	postive
IL12RB1	CAPG	0.573755	2.63e-36	postive
IL13RA1	CAPG	0.575404	1.5e-36	postive
IL16	CAPG	0.54433	3.72e-32	postive
IL18	CAPG	0.636607	9.99e-47	postive
IL2RG	CAPG	0.591463	5.18e-39	postive
IRF5	CAPG	0.606171	2.17e-41	postive
ISG20	CAPG	0.539208	1.79e-31	postive
ITGB2	CAPG	0.67986	1.97e-55	postive
LCP2	CAPG	0.631528	8.54e-46	postive
LTBR	CAPG	0.563584	7.99e-35	postive
LYN	CAPG	0.634661	2.28e-46	postive
MAPK8	CAPG	-0.647929	7.2e-49	negative
MAPT	CAPG	-0.692842	2.41e-58	negative
MICA	CAPG	0.502535	6.38e-27	postive
MR1	CAPG	0.583938	7.67e-38	postive
MSR1	CAPG	0.678756	3.44e-55	postive
MYDGF	CAPG	0.517126	1.15e-28	postive
OLR1	CAPG	0.543662	4.58e-32	postive
PIK3R5	CAPG	0.560165	2.45e-34	postive
PLAUR	CAPG	0.534328	7.77e-31	postive
PLSCR1	CAPG	0.618996	1.44e-43	postive
PPARG	CAPG	0.697743	1.75e-59	postive
PRDX1	CAPG	0.504197	4.08e-27	postive
PRKCA	CAPG	-0.549577	7.26e-33	negative
PROCR	CAPG	0.536242	4.38e-31	postive
PSMB8	CAPG	0.519343	6.12e-29	postive
PSMC2	CAPG	0.556147	8.99e-34	postive
PSME2	CAPG	0.510334	7.63e-28	postive
PTAFR	CAPG	0.505609	2.78e-27	postive
PTPN6	CAPG	0.671571	1.2e-53	postive
RABEP1	CAPG	-0.504355	3.91e-27	negative
RAC2	CAPG	0.711662	7.46e-63	postive
RELB	CAPG	0.590737	6.74e-39	postive
RHOA	CAPG	0.516438	1.39e-28	postive
RNASE2	CAPG	0.555586	1.08e-33	postive
S100A10	CAPG	0.606447	1.95e-41	postive
S100A11	CAPG	0.785694	7.95e-85	postive
S100A13	CAPG	0.54513	2.91e-32	postive
S100A16	CAPG	0.513042	3.6e-28	postive
S100A6	CAPG	0.593538	2.43e-39	postive
SEMA4G	CAPG	-0.636049	1.27e-46	negative
SEMA6B	CAPG	-0.510346	7.61e-28	negative
SLC11A1	CAPG	0.51267	4e-28	postive
SOS2	CAPG	-0.57198	4.82e-36	negative
SPP1	CAPG	0.62676	6.18e-45	postive
SYK	CAPG	0.514127	2.66e-28	postive
TAPBPL	CAPG	0.512139	4.63e-28	postive
TGFB1	CAPG	0.623382	2.46e-44	postive
THRA	CAPG	-0.521837	3e-29	negative
TLR1	CAPG	0.556333	8.47e-34	postive
TLR2	CAPG	0.559324	3.22e-34	postive
TLR3	CAPG	0.539375	1.7e-31	postive
TMSB10	CAPG	0.572657	3.83e-36	postive
TMSB4X	CAPG	0.65404	4.6e-50	postive
TNFRSF14	CAPG	0.698272	1.31e-59	postive
TNFRSF1A	CAPG	0.677161	7.62e-55	postive
TNFSF12	CAPG	0.666553	1.35e-52	postive
TNFSF13	CAPG	0.541282	9.5e-32	postive
TNFSF8	CAPG	0.607131	1.5e-41	postive
TYMP	CAPG	0.670612	1.91e-53	postive
TYROBP	CAPG	0.734339	8.56e-69	postive
UNC93B1	CAPG	0.744993	8.43e-72	postive
VAV1	CAPG	0.592311	3.81e-39	postive
VIM	CAPG	0.577533	7.2e-37	postive
LTBP3	CAPN2	0.518884	6.97e-29	postive
PSME3	CAPRIN1	0.549121	8.37e-33	postive
ACVR2B	CASC3	0.674655	2.64e-54	postive
APOBEC3C	CASC3	-0.540561	1.18e-31	negative
APOBEC3F	CASC3	-0.577109	8.33e-37	negative
APOBEC3G	CASC3	-0.563351	8.62e-35	negative
BMP2	CASC3	0.579053	4.25e-37	postive
BRD8	CASC3	0.537248	3.23e-31	postive
CD40	CASC3	-0.507558	1.64e-27	negative
CHGB	CASC3	0.512852	3.8e-28	postive
FCER1G	CASC3	-0.503965	4.34e-27	negative
FCGRT	CASC3	-0.516534	1.36e-28	negative
GMFG	CASC3	-0.502757	6.01e-27	negative
GSK3B	CASC3	0.530312	2.56e-30	postive
HFE	CASC3	-0.571409	5.85e-36	negative
IFNGR2	CASC3	-0.57827	5.58e-37	negative
IL13RA1	CASC3	-0.51544	1.84e-28	negative
LTBR	CASC3	-0.511878	4.98e-28	negative
MAPK8	CASC3	0.570214	8.76e-36	postive
MAPT	CASC3	0.662026	1.15e-51	postive
MICA	CASC3	-0.503955	4.35e-27	negative
NR2C2	CASC3	0.517696	9.76e-29	postive
OSMR	CASC3	-0.502461	6.51e-27	negative
PSMC2	CASC3	-0.521462	3.35e-29	negative
RELB	CASC3	-0.501747	7.89e-27	negative
[truncated: 19,732 more rows]

## Sheet: Supplementary Table S4
Supplementary Table S4. Prognosis-related RBPs（n=749）.
id	HR	HR.95L	HR.95H	pvalue
AAR2	2.10546	1.28935	3.43813	0.00292331
AATF	0.52589	0.389526	0.709992	2.71186e-05
ABT1	2.07093	1.41916	3.02204	0.000159749
ACO2	0.575008	0.487295	0.67851	5.64539e-11
ADARB1	0.613181	0.452079	0.831691	0.0016607
ADARB2	0.494776	0.406238	0.602611	2.65771e-12
ADAT1	1.66961	1.1441	2.43651	0.00785993
ADSL	1.59964	1.22214	2.09374	0.000624771
ADSS	1.61373	1.27685	2.03948	6.18229e-05
AEN	1.84363	1.52587	2.22755	2.32534e-10
AFF2	0.261915	0.181586	0.377779	7.56882e-13
AHCY	2.05829	1.65008	2.56749	1.54897e-10
AHNAK2	1.48893	1.23696	1.79223	2.57605e-05
AIMP2	1.62671	1.13699	2.32734	0.00775558
AKAP13	0.663394	0.5004	0.879479	0.00433528
ALDH18A1	0.548053	0.40036	0.750229	0.000174236
ALDOA	1.89534	1.39986	2.56621	3.54079e-05
ALKBH8	0.457988	0.301498	0.695701	0.000251284
ALYREF	1.48161	1.17325	1.87101	0.000960014
AMPD2	0.630443	0.453671	0.876095	0.0059982
ANG	2.34991	1.97702	2.79313	3.27944e-22
ANKFY1	0.639423	0.502176	0.81418	0.000286114
ANXA1	1.52657	1.4015	1.6628	3.02466e-22
ANXA2	1.71384	1.54846	1.89688	2.3328e-25
ANXA5	1.99162	1.72829	2.29507	1.70272e-21
AP3B1	1.928	1.23477	3.01041	0.00388242
APEX2	3.49908	2.46038	4.97627	3.1599e-12
APOBEC3B	2.349	1.93366	2.85357	7.82365e-18
APOBEC3C	2.17809	1.88778	2.51304	1.46898e-26
APOBEC3D	3.68193	2.82287	4.8024	6.86805e-22
AQR	0.593482	0.401769	0.876675	0.0087621
ARF3	0.576334	0.435012	0.763568	0.000123349
ARF4	2.70462	2.15135	3.40016	1.58499e-17
ARL11	2.60304	2.00235	3.38393	8.87461e-13
ARL5A	2.91237	1.82163	4.65622	8.00664e-06
ARL6	1.69028	1.1658	2.45071	0.0056165
ARPP21	0.467081	0.394698	0.552738	7.92933e-19
ASCC1	0.252383	0.18261	0.348816	7.49023e-17
ASIC2	0.597178	0.440141	0.810245	0.000927626
ASPM	1.67808	1.42742	1.97276	3.58268e-10
ASS1	1.33427	1.18468	1.50275	2.00071e-06
ATAD2	1.39445	1.14473	1.69864	0.000958369
ATF7IP	0.444621	0.344409	0.573992	4.96288e-10
ATL3	2.70115	1.99476	3.6577	1.32422e-10
ATP1A1	2.03744	1.63475	2.53933	2.38149e-10
ATP6V1A	0.555868	0.417124	0.740761	6.11867e-05
BCCIP	0.21042	0.149731	0.295709	2.76096e-19
BCLAF3	0.536831	0.335122	0.859948	0.00966517
BLM	1.52111	1.30714	1.7701	5.86667e-08
BRAT1	1.73461	1.28689	2.33809	0.000299449
BRCA1	2.52655	1.96122	3.25482	7.38242e-13
BRIX1	2.08042	1.39248	3.10822	0.000348517
BTN3A3	1.49496	1.23091	1.81565	5.01137e-05
BUD23	2.55864	1.83895	3.55999	2.47391e-08
BZW1	4.63058	3.43342	6.24515	9.89853e-24
C12orf65	0.369788	0.219855	0.62197	0.000176879
C18orf21	1.69267	1.21527	2.35761	0.00185031
CALD1	2.08793	1.77658	2.45386	4.07156e-19
CALR	3.25523	2.53869	4.17402	1.34439e-20
CALU	2.00349	1.75621	2.28558	4.68978e-25
CANX	2.79246	1.97696	3.94435	5.61348e-09
CAPG	1.93019	1.69552	2.19734	2.70269e-23
CASC3	0.367761	0.265767	0.508897	1.57892e-09
CBX3	2.26577	1.78445	2.87692	1.90759e-11
CCAR1	0.382981	0.266458	0.550458	2.15463e-07
CCDC59	1.92621	1.32818	2.79351	0.00054769
CCT3	0.55508	0.393454	0.7831	0.000801179
CD58	2.12481	1.86155	2.42529	5.84815e-29
CDC40	0.525348	0.364406	0.757369	0.000562628
CDC42BPA	0.622062	0.47447	0.815567	0.000591923
CDC42BPB	0.494402	0.410327	0.595705	1.29308e-13
CDK4	1.25129	1.15138	1.35988	1.29134e-07
CEBPZ	0.552255	0.373747	0.81602	0.0028767
CELF2	0.450413	0.364163	0.55709	1.9189e-13
CELF3	0.687686	0.614664	0.769383	6.26444e-11
CELF4	0.698275	0.607032	0.803231	4.98683e-07
CELF5	0.64482	0.567866	0.732201	1.31336e-11
CENPE	2.09296	1.69828	2.57935	4.27976e-12
CENPF	1.38623	1.22788	1.56501	1.31325e-07
CEP55	1.98723	1.69	2.33673	9.73783e-17
CHD3	0.540032	0.458171	0.636519	2.041e-13
CHD4	0.486593	0.384364	0.616011	2.1454e-09
CHD5	0.612518	0.514454	0.729276	3.66165e-08
CHD7	0.526109	0.443009	0.624796	2.44287e-13
CHD9	0.447965	0.339784	0.590589	1.23889e-08
CIT	0.647336	0.535687	0.782255	6.71977e-06
CKAP2	1.41266	1.17444	1.69921	0.00024606
CKAP4	2.5805	2.04424	3.25744	1.51524e-15
CLASP2	0.41555	0.343165	0.503202	2.40796e-19
CLIC1	1.93945	1.71987	2.18707	3.2651e-27
CLP1	4.52219	2.89374	7.06704	3.47907e-11
CMTR2	2.31769	1.49843	3.58487	0.000158527
CNN2	1.21823	1.06537	1.39301	0.00390628
CNN3	1.96659	1.64532	2.35059	1.07313e-13
CNOT11	3.28716	2.33353	4.6305	9.95494e-12
CNOT6	0.527965	0.37653	0.740304	0.000212696
COPB1	4.88562	3.39543	7.02982	1.29002e-17
COPB2	3.3697	2.20126	5.15836	2.24552e-08
COQ5	1.56908	1.1138	2.21048	0.009986
CORO1B	2.08337	1.30523	3.32543	0.0020947
CORO1C	0.711454	0.560209	0.903531	0.00524031
CPEB3	0.283016	0.216739	0.36956	1.82029e-20
CPEB4	0.583934	0.468302	0.728118	1.77001e-06
CPSF2	0.496324	0.315367	0.781113	0.00246476
CPSF3	1.70696	1.21371	2.40065	0.00211831
CPSF4	3.04168	2.3021	4.01885	5.0282e-15
CRCP	2.66472	2.01653	3.52126	5.49958e-12
CSRP1	1.50718	1.29863	1.74923	6.71146e-08
CSTB	3.19552	2.39777	4.25869	2.22876e-15
CSTF1	2.51751	1.55006	4.08877	0.00019052
CTIF	0.414747	0.349632	0.49199	5.53354e-24
CTNNA1	3.82994	2.74548	5.34276	2.65246e-15
CWF19L2	0.322308	0.220688	0.470721	4.65494e-09
CYFIP1	1.84093	1.44142	2.35116	1.0122e-06
CYFIP2	0.521635	0.435394	0.624958	1.68773e-12
DALRD3	2.56554	1.92764	3.41455	1.05027e-10
DAP	3.20937	2.4983	4.12282	7.17782e-20
DAP3	3.39884	2.24143	5.15389	8.4242e-09
DARS2	2.58254	1.86225	3.58142	1.29302e-08
DBR1	3.24821	1.90678	5.53334	1.4596e-05
DCAF13	1.96047	1.34716	2.85299	0.000436896
DCPS	2.27919	1.64086	3.16584	8.93484e-07
DCTN1	0.482766	0.384756	0.605741	3.17895e-10
DDX19B	2.113	1.22611	3.64141	0.00705905
DDX20	2.6256	1.87108	3.68439	2.34444e-08
DDX21	0.479638	0.36198	0.63554	3.11107e-07
DDX24	0.423946	0.313176	0.573895	2.79396e-08
DDX25	0.457849	0.365565	0.573429	1.03001e-11
DDX39A	1.85454	1.48442	2.31694	5.38946e-08
DDX56	2.26769	1.70877	3.00941	1.42149e-08
DDX58	1.50989	1.25409	1.81788	1.35823e-05
DDX60	1.6334	1.34762	1.97977	5.7227e-07
DDX60L	1.94807	1.58107	2.40028	3.81937e-10
DEK	2.04907	1.55144	2.70632	4.32593e-07
DHX15	2.33484	1.63739	3.32937	2.81836e-06
DHX40	2.11352	1.50708	2.96399	1.44317e-05
DHX8	2.13519	1.362	3.34732	0.000943678
DIAPH1	2.27032	1.71432	3.00664	1.05955e-08
DKC1	1.96089	1.41753	2.71252	4.75213e-05
DNAAF5	3.32321	2.55375	4.32451	3.99085e-19
DNAJC27	0.326357	0.202857	0.525046	3.91924e-06
DNASE1	0.515221	0.352897	0.752212	0.000593187
DNM1L	0.455939	0.305156	0.681227	0.000126256
DNMBP	0.429888	0.323636	0.571023	5.6014e-09
DOCK7	1.40947	1.13323	1.75306	0.00204435
DTYMK	1.9651	1.66301	2.32206	2.14636e-15
DUS2	0.425008	0.252072	0.716587	0.00132594
DUS4L	3.41024	2.05793	5.65119	1.93105e-06
DUSP11	2.42834	1.68549	3.49859	1.91575e-06
DYNC1H1	0.427032	0.354367	0.514596	3.85395e-19
ECPAS	0.634664	0.468331	0.860071	0.003367
EDC3	0.423682	0.278192	0.64526	6.30389e-05
EEF1D	0.473276	0.351466	0.637302	8.33606e-07
EEF2	0.407464	0.325766	0.509651	3.73271e-15
EFTUD2	1.67976	1.23981	2.27583	0.000816056
EHD3	0.558374	0.466909	0.667755	1.72098e-10
EHD4	2.24103	1.83068	2.74338	5.29113e-15
EIF2A	0.526593	0.368602	0.7523	0.00042536
EIF2B1	2.89798	1.79954	4.6669	1.20475e-05
EIF2S2	3.23833	2.14516	4.88856	2.24296e-08
EIF3B	1.57368	1.13227	2.18718	0.00694305
EIF3H	0.39336	0.281369	0.549924	4.81738e-08
EIF3L	0.554729	0.472075	0.651855	8.15976e-13
EIF4A2	0.428113	0.317543	0.577184	2.6167e-08
EIF4A3	2.82376	1.89483	4.20811	3.39785e-07
EIF4B	0.42222	0.320858	0.555603	7.47056e-10
EIF4EBP1	1.51455	1.29847	1.76658	1.25321e-07
EIF4EBP2	0.266234	0.19485	0.363769	9.60432e-17
EIF4G2	3.09284	2.07162	4.61746	3.352e-08
EIF5A	2.34748	1.76307	3.12562	5.15475e-09
EIF5AL1	1.79657	1.41536	2.28046	1.4739e-06
EIF6	2.14829	1.60676	2.87231	2.46896e-07
ELAC1	2.62971	1.62604	4.2529	8.07951e-05
ELAVL2	0.573307	0.484798	0.677974	7.89849e-11
ELAVL3	0.638818	0.564229	0.723269	1.50383e-12
ELAVL4	0.656983	0.574618	0.751154	7.90905e-10
EML4	2.31224	1.72053	3.10744	2.72788e-08
ENAH	0.394168	0.303185	0.512454	3.5778e-12
ENDOU	0.587042	0.416881	0.826659	0.00228863
ERI1	4.33953	3.29529	5.71467	1.45529e-25
ESF1	0.62551	0.486703	0.803905	0.000247365
ESPL1	1.88687	1.55985	2.28244	6.22166e-11
ETHE1	2.59359	2.05726	3.26974	7.44771e-16
EXOSC7	0.551484	0.360128	0.844519	0.00619692
FAM120A	2.12392	1.40945	3.20057	0.000317825
FAM120C	0.418448	0.302714	0.57843	1.33501e-07
FANCD2	1.98612	1.63335	2.41507	6.08694e-12
FANCI	1.68449	1.45052	1.95619	8.21943e-12
FARS2	3.43117	2.18695	5.38327	8.0862e-08
FASN	0.550024	0.473946	0.638314	3.53502e-15
FASTKD3	2.72407	1.9068	3.89163	3.66325e-08
FBLL1	0.630922	0.562181	0.708069	5.06875e-15
FBXO22	4.07669	2.76799	6.00414	1.12677e-12
FCHO1	0.639783	0.4827	0.847984	0.00188932
FERMT2	1.56506	1.19415	2.05119	0.00117183
FHL2	1.61937	1.3301	1.97155	1.57775e-06
FLNA	1.63008	1.42001	1.87122	3.87836e-12
FLYWCH2	0.541982	0.365247	0.804235	0.00235072
FN1	1.50704	1.36997	1.65784	3.46761e-17
FNDC3B	3.12977	2.51918	3.88836	6.76394e-25
FTSJ1	2.43976	1.56281	3.80878	8.68489e-05
FTSJ3	0.559777	0.411913	0.760718	0.00020925
FUBP3	0.463834	0.357857	0.601194	6.44737e-09
FXR2	0.348704	0.264943	0.458948	5.62404e-14
G3BP1	2.10783	1.2391	3.58562	0.00594377
GALNT2	2.44136	1.94055	3.0714	2.53918e-14
GANAB	4.14879	2.90125	5.93279	6.35923e-15
GART	1.73087	1.20493	2.48638	0.00299041
GBE1	2.3889	1.9365	2.94699	4.30871e-16
GCC2	0.520406	0.363051	0.745963	0.000377557
GCN1	0.543808	0.400087	0.739158	0.000100203
GEMIN6	1.78802	1.23891	2.58052	0.00190647
GIMAP2	2.32277	1.93344	2.79048	2.18246e-19
GIMAP4	1.47127	1.24197	1.7429	7.93978e-06
GIMAP6	1.57617	1.26565	1.96287	4.815e-05
GNAI2	2.26243	1.55884	3.28358	1.74007e-05
GNAI3	3.9331	2.69928	5.73091	1.00407e-12
GNL2	2.10068	1.54547	2.85534	2.13876e-06
GOT1	0.673708	0.534838	0.848634	0.00079784
GPANK1	0.27883	0.187677	0.414255	2.56413e-10
GPI	2.12103	1.69468	2.65466	5.13447e-11
GPN1	3.07954	2.37459	3.99379	2.24576e-17
GTF2B	2.42941	1.77568	3.32381	2.85559e-08
GTPBP2	1.79527	1.37121	2.35048	2.07979e-05
GTSE1	1.65936	1.43084	1.92438	2.09977e-11
H1F0	0.506244	0.423955	0.604505	5.42171e-14
H2AFY	3.28756	2.20354	4.90486	5.52831e-09
H3F3C	3.06232	2.39934	3.90851	2.45877e-19
HABP4	0.345853	0.262327	0.455972	5.1389e-14
HADHA	0.285613	0.186772	0.436761	7.36416e-09
HAGH	0.346983	0.227958	0.528158	7.88908e-07
HAT1	4.49593	3.12841	6.46122	4.50804e-16
HBP1	2.63302	1.86202	3.72324	4.33259e-08
HDGFL3	0.261753	0.178795	0.383203	5.49422e-12
HELLS	1.75529	1.34313	2.29392	3.7817e-05
HELZ2	1.43279	1.20794	1.69948	3.64157e-05
HERC1	0.398318	0.316983	0.500521	2.80932e-15
HERC2	0.457284	0.364473	0.573727	1.37715e-11
HERC5	1.65211	1.43695	1.89948	1.76032e-12
HEXIM2	0.231792	0.141627	0.379357	6.01891e-09
HFM1	0.282517	0.184296	0.433085	6.65979e-09
HINT3	0.28024	0.212039	0.370376	3.8711e-19
HIST1H4I	1.82183	1.52466	2.17693	4.05194e-11
HK2	1.65789	1.43187	1.91958	1.37442e-11
HMGB1	1.69284	1.16675	2.45613	0.00556921
HMGB2	1.83149	1.54967	2.16456	1.26364e-12
HMGN5	0.422627	0.356174	0.501479	5.75751e-23
HNRNPA1	0.650872	0.485237	0.873046	0.00415609
HNRNPA1L2	0.478854	0.32519	0.70513	0.000191912
HNRNPA1P48	1.90451	1.5493	2.34115	9.53943e-10
HNRNPAB	1.89156	1.42559	2.50984	9.99529e-06
HNRNPF	1.97127	1.43146	2.71464	3.22372e-05
HNRNPH1	1.73218	1.29033	2.32532	0.000255666
HNRNPL	3.09725	2.00288	4.78957	3.71728e-07
HSD17B10	2.06524	1.61015	2.64897	1.12678e-08
HSP90AB1	0.500475	0.356977	0.701658	5.93992e-05
HSP90B1	2.71524	2.08725	3.53218	9.84271e-14
HSPB1	1.95784	1.70065	2.25392	8.75348e-21
HTT	0.492427	0.380107	0.637937	8.18315e-08
IFI16	1.73765	1.4601	2.06796	4.88347e-10
IFIH1	1.64565	1.41453	1.91453	1.10861e-10
IGF2BP3	2.00392	1.70202	2.35938	7.2292e-17
IGHMBP2	0.390137	0.268242	0.567426	8.45096e-07
ILF2	1.53583	1.13812	2.07254	0.00501549
ILF3	0.59875	0.436317	0.821654	0.00149061
IMPDH2	0.524693	0.41118	0.669543	2.15775e-07
INPP5A	0.334144	0.253584	0.440295	6.81372e-15
INPP5J	0.436888	0.31097	0.613794	1.8078e-06
INTS9	2.81114	1.81865	4.34526	3.29171e-06
IPO7	0.636808	0.477385	0.84947	0.00214298
ISY1	0.265157	0.160832	0.437156	1.9526e-07
ITGB1	2.05484	1.69875	2.48558	1.1958e-13
ITPRID2	2.30822	1.83392	2.90518	1.02202e-12
JPT2	2.53313	2.01928	3.17776	9.35146e-16
KDM3B	0.412094	0.317458	0.53494	2.74597e-11
KHDRBS2	0.303323	0.223161	0.41228	2.56617e-14
KHSRP	0.61544	0.460173	0.823096	0.00106639
KIF11	1.36623	1.16404	1.60353	0.000134051
KIF14	1.76964	1.45192	2.15688	1.57472e-08
KIF15	1.61216	1.36498	1.90411	1.86602e-08
KIF1B	0.567117	0.476956	0.674321	1.35734e-10
KIF20A	1.95501	1.69239	2.25838	8.3379e-20
KIF23	1.92283	1.64022	2.25413	7.57007e-16
KIF2C	1.66216	1.46788	1.88216	1.12794e-15
KIF4A	1.76741	1.54365	2.02361	1.63801e-16
KIFC1	1.4311	1.267	1.61646	8.00285e-09
KNTC1	1.9293	1.54882	2.40325	4.53235e-09
KRI1	0.599943	0.43636	0.824849	0.00165864
L1CAM	0.802446	0.730126	0.881929	4.94039e-06
LARP1	0.627388	0.492461	0.799285	0.000161089
LARP4	2.19336	1.55298	3.0978	8.24403e-06
LARS	0.492214	0.323247	0.749505	0.00095335
LIMD1	1.49234	1.20113	1.85417	0.00030087
LIMS1	2.93368	2.26748	3.79562	2.63167e-16
LLPH	2.14395	1.27489	3.60543	0.0040312
LMAN1	2.37716	1.82824	3.09089	1.01942e-10
LMAN2	3.02205	2.36123	3.86781	1.57181e-18
LMNB1	1.63354	1.41318	1.88825	3.18391e-11
LMNB2	1.44223	1.18327	1.75786	0.000287267
LRRC59	3.77698	2.69983	5.28387	8.62608e-15
LSG1	2.33401	1.52556	3.5709	9.35653e-05
LSM1	2.61176	1.7467	3.90524	2.90843e-06
LSM10	2.1326	1.75843	2.5864	1.42514e-14
LSM11	0.334698	0.2179	0.5141	5.78305e-07
LSM12	5.9632	4.04096	8.79983	2.38737e-19
LSM14A	1.67366	1.22677	2.28333	0.00115582
LSM2	1.386	1.12661	1.7051	0.0020178
LSM3	1.77085	1.28862	2.43354	0.000426095
LSM5	1.86237	1.54892	2.23927	3.75816e-11
LSM6	1.97461	1.35268	2.88249	0.000423225
LSM7	1.36555	1.13443	1.64375	0.000990784
LSM8	2.09932	1.41364	3.11757	0.000237196
MAGOHB	1.89804	1.41436	2.54713	1.95532e-05
MALSU1	2.89825	2.29914	3.65349	2.13264e-19
MANF	2.41081	1.94333	2.99073	1.23355e-15
MAP3K20	2.59612	2.05747	3.27579	8.91467e-16
MAPK1	0.519374	0.390605	0.690593	6.58956e-06
MAPK10	0.444392	0.363122	0.543851	3.52809e-15
MAPK9	0.308923	0.206651	0.46181	1.02677e-08
MARCKS	0.440079	0.349538	0.554073	2.86581e-12
MBD2	4.21174	2.96067	5.99146	1.28786e-15
MBLAC2	0.524306	0.346748	0.792786	0.0022086
MCM2	1.76292	1.53195	2.02872	2.51184e-15
MCM3	2.08754	1.67183	2.60662	8.25571e-11
MCM4	1.85488	1.54814	2.22241	2.10373e-11
MCM5	2.2193	1.77181	2.7798	3.96303e-12
MCM6	2.1152	1.7539	2.55092	4.54059e-15
MCM7	1.36082	1.11408	1.6622	0.00254161
MCMBP	0.426458	0.26826	0.67795	0.000314156
MDM2	1.39148	1.26127	1.53512	4.37515e-11
MED12	0.67301	0.518206	0.874059	0.00298493
METTL16	0.384648	0.262973	0.56262	8.46563e-07
METTL2B	1.8263	1.2674	2.63166	0.00123232
METTL4	2.67629	1.84112	3.8903	2.49379e-07
METTL7B	1.45087	1.34897	1.56047	1.29128e-23
MEX3A	0.719632	0.616986	0.839355	2.78607e-05
MKI67	1.30245	1.1439	1.48297	6.60395e-05
MLEC	1.92313	1.40875	2.62534	3.82303e-05
MOGS	2.7813	1.88731	4.09877	2.33688e-07
MOV10	2.10613	1.6979	2.61252	1.23898e-11
MPRIP	0.458227	0.372052	0.56436	2.10545e-13
MRM2	4.43258	3.14987	6.23764	1.31144e-17
MRPL11	1.62383	1.29936	2.02932	2.02216e-05
MRPL13	2.24998	1.78361	2.8383	7.78639e-12
MRPL15	2.35539	1.82068	3.04714	6.98656e-11
MRPL23	1.66441	1.33054	2.08207	8.19453e-06
MRPL27	1.50675	1.15751	1.96138	0.00231016
MRPL3	2.23475	1.43874	3.47116	0.000344864
MRPL36	2.9049	2.28898	3.68656	1.76865e-18
MRPL39	3.05095	2.21694	4.19871	7.57085e-12
MRPL47	2.31562	1.77733	3.01692	4.95267e-10
MRPL49	2.09627	1.59697	2.75169	9.69316e-08
MRPL53	1.93228	1.34406	2.77794	0.000375854
MRPL58	1.7587	1.36305	2.26919	1.41219e-05
MRPS31	0.386044	0.258045	0.577535	3.63676e-06
MRPS33	1.82639	1.32587	2.51586	0.000227717
MRPS6	2.39922	1.85899	3.09644	1.77348e-11
MRPS7	1.70511	1.29855	2.23898	0.000123153
MSH6	1.9268	1.39464	2.66202	6.97962e-05
MSI2	0.674106	0.512993	0.885818	0.00465456
MTERF1	1.59488	1.32607	1.91818	7.16792e-07
MTERF3	3.0543	2.21167	4.21797	1.20684e-11
MTHFSD	0.421485	0.260774	0.681241	0.000420533
MYCBP2	0.455777	0.365431	0.568459	3.15e-12
MYH7B	0.283663	0.189407	0.424826	9.70179e-10
MYL6	1.76391	1.50184	2.07171	4.65411e-12
MYO18A	0.56642	0.479639	0.668903	2.09724e-11
MYO5A	0.603711	0.501879	0.726204	8.59248e-08
MYOF	1.70831	1.46498	1.99207	8.47798e-12
NABP2	1.77581	1.25269	2.51739	0.00125817
NAP1L1	0.314052	0.227074	0.434347	2.55792e-12
NCAPD2	1.49159	1.22586	1.81492	6.48925e-05
NCAPG	1.70145	1.4793	1.95694	9.65438e-14
NCAPG2	1.9252	1.58077	2.34468	7.36427e-11
NCAPH	1.62767	1.42194	1.86317	1.59513e-12
NEIL3	2.48606	2.01224	3.07146	3.13848e-17
NGRN	0.470627	0.349701	0.63337	6.56012e-07
NIP7	2.82681	2.07544	3.85021	4.34739e-11
NKIRAS1	0.252031	0.178086	0.35668	7.36327e-15
NKIRAS2	1.92225	1.38278	2.67219	0.000100918
NKRF	0.232655	0.140291	0.385828	1.60361e-08
NME1	1.52924	1.29507	1.80575	5.46882e-07
NOB1	0.442589	0.300094	0.652747	3.92751e-05
NOC3L	0.439253	0.272658	0.707639	0.00072132
NOCT	2.81233	2.04595	3.8658	1.89043e-10
NOL10	2.2753	1.49081	3.47261	0.000138354
NOL11	2.1918	1.53432	3.13102	1.61353e-05
NOM1	2.00184	1.38279	2.89804	0.000236031
NOP10	1.97041	1.64825	2.35554	9.62129e-14
NOP14	1.87238	1.21655	2.88176	0.00435855
NOP16	2.23519	1.59294	3.1364	3.25923e-06
NOP53	0.500741	0.396921	0.631717	5.39756e-09
NOVA1	0.640208	0.52869	0.775249	4.9494e-06
NOVA2	0.498242	0.390251	0.636115	2.2791e-08
NPM1	1.57401	1.20751	2.05175	0.000795763
NPM2	0.628303	0.51344	0.768862	6.4316e-06
NRAS	2.59931	1.96374	3.44058	2.43605e-11
NUP160	2.42336	1.7144	3.4255	5.36625e-07
NUP205	2.25281	1.71733	2.95525	4.48713e-09
NUP35	2.14881	1.48776	3.10359	4.54489e-05
NUP88	1.99047	1.31429	3.01454	0.0011522
NUP98	1.96573	1.28931	2.99703	0.00168461
NUSAP1	1.53198	1.36746	1.7163	1.85245e-13
NXT1	1.95068	1.65696	2.29647	1.01657e-15
NXT2	1.51851	1.206	1.91199	0.000380483
OAS1	1.47505	1.33573	1.62891	1.6116e-14
OAS3	1.49487	1.33811	1.66999	1.13591e-12
OAT	0.329869	0.252295	0.431295	5.14859e-16
ODF2	1.82704	1.38624	2.40799	1.88246e-05
OTUB1	0.538653	0.348144	0.833412	0.00546478
P3H1	2.1479	1.82793	2.52389	1.55918e-20
P4HA1	1.69576	1.34464	2.13857	8.13491e-06
P4HB	3.01954	2.42308	3.76281	7.38753e-23
PABPC1	0.622845	0.498078	0.778866	3.30752e-05
PABPC1L	1.59766	1.39163	1.83418	2.89874e-11
PABPC4	1.86733	1.36675	2.55124	8.77502e-05
PAIP1	4.34187	2.91464	6.46799	5.17783e-13
PAIP2B	0.571841	0.480749	0.680193	2.73546e-10
PAK1IP1	1.80896	1.25578	2.60583	0.0014578
PALLD	2.35538	1.88799	2.93848	3.16757e-14
PARD3	0.383812	0.302511	0.486964	3.15022e-15
PARP10	1.65007	1.39591	1.9505	4.40261e-09
PARP12	1.98053	1.69732	2.311	3.97452e-18
PARP14	1.50916	1.28574	1.77142	4.79294e-07
PARP4	2.07327	1.51914	2.82954	4.32144e-06
PARS2	2.21287	1.55401	3.15108	1.06045e-05
PATZ1	0.300659	0.237487	0.380637	1.75e-23
PCF11	0.463056	0.337528	0.635267	1.82133e-06
PCNA	2.13683	1.81075	2.52162	2.51609e-19
PCNT	0.468888	0.356851	0.616101	5.42904e-08
PDAP1	2.69353	1.88161	3.8558	6.17213e-08
PDIA3	3.16237	2.46262	4.06095	1.83436e-19
PDIA4	2.53372	2.12696	3.01827	2.17422e-25
PDIA6	2.85037	2.28572	3.5545	1.41442e-20
PDLIM5	0.65358	0.555434	0.769068	3.01028e-07
PDLIM7	1.78313	1.51821	2.09429	1.81727e-12
PES1	0.349515	0.250686	0.487305	5.66766e-10
PFN1	2.92615	2.27064	3.77089	1.06537e-16
PGD	2.31212	1.70343	3.13833	7.57781e-08
PHF5A	1.90985	1.49975	2.4321	1.55268e-07
PHF6	0.480292	0.347432	0.663958	9.0503e-06
PI4KA	0.651696	0.517401	0.820848	0.000276122
PIH1D2	1.90369	1.5053	2.40752	7.70416e-08
PITRM1	0.304902	0.226672	0.410132	4.09958e-15
PKN2	1.84804	1.3477	2.53413	0.00013764
PLCB3	0.531259	0.408418	0.691047	2.42434e-06
PLIN3	1.9216	1.55248	2.37849	1.95375e-09
PLOD1	2.3819	1.98699	2.8553	6.37569e-21
PLOD2	1.98674	1.70502	2.31501	1.38234e-18
PLOD3	2.64748	2.18239	3.21168	5.20368e-23
PML	2.20028	1.62321	2.9825	3.74987e-07
PNN	0.541641	0.435401	0.673804	3.70941e-08
PNO1	2.9005	2.25008	3.73895	2.04087e-16
POLD1	1.79009	1.46264	2.19083	1.6133e-08
POLD2	1.94137	1.4532	2.59352	7.14464e-06
POLDIP3	0.342272	0.25642	0.456867	3.42499e-13
POLE	1.41463	1.0877	1.83982	0.00968288
POLR2F	0.262599	0.185809	0.371125	3.55584e-14
POLR2G	1.92543	1.53849	2.40969	1.04301e-08
POLR2H	1.80993	1.43144	2.2885	7.17934e-07
POLR2J	2.09721	1.67681	2.62301	8.67402e-11
POLR3A	0.233398	0.164877	0.330397	2.29841e-16
POLR3GL	0.329428	0.218805	0.495979	1.04442e-07
POP5	1.90845	1.4545	2.50406	3.10964e-06
PPIB	2.61324	2.04466	3.33992	1.67492e-14
PPM1G	1.92898	1.30011	2.86204	0.00109964
PPP1CA	2.56814	2.04595	3.22363	4.221e-16
PPP1CB	2.62638	2.07135	3.33012	1.56275e-15
PPP1CC	2.37525	1.5584	3.62025	5.73941e-05
PPP1R18	1.8834	1.43775	2.46719	4.31582e-06
PPP6R1	1.75039	1.21681	2.51795	0.00254663
PPP6R3	0.307773	0.195432	0.484692	3.66532e-07
PRC1	1.61679	1.40371	1.86222	2.68373e-11
PRIM2	3.04323	2.2012	4.20736	1.64966e-11
PRKAR2A	1.92448	1.36615	2.71098	0.000180711
PRPF19	0.331633	0.214913	0.511744	6.13773e-07
PRPF4	2.34757	1.64228	3.35575	2.85069e-06
PRRC2B	0.701631	0.601771	0.818062	6.08e-06
PSMA7	2.44373	1.95277	3.05811	5.77866e-15
PTBP1	2.61279	1.98268	3.44316	9.04454e-12
PTBP2	0.400347	0.287442	0.5576	6.113e-08
PTK2	0.496009	0.351691	0.699549	6.42168e-05
PTPN1	3.45333	2.34488	5.08575	3.49787e-10
PTRHD1	1.83572	1.47236	2.28875	6.75444e-08
PUF60	0.593583	0.411389	0.856466	0.00529945
PUM3	1.60532	1.18529	2.17419	0.00222561
PUS7	2.32078	1.7751	3.03419	7.45501e-10
PXN	1.97749	1.3947	2.80383	0.000129492
PYGL	1.93398	1.68649	2.21778	3.68821e-21
PYM1	1.74913	1.21815	2.51156	0.00245356
PYURF	2.51757	1.97003	3.2173	1.597e-13
QTRT2	2.66025	1.81897	3.89062	4.54723e-07
R3HDM2	0.315513	0.228913	0.434873	1.83393e-12
RAB13	1.87646	1.4948	2.35556	5.80125e-08
RAB33A	0.654527	0.573565	0.746917	3.14767e-10
RAB3GAP1	0.558961	0.391803	0.797435	0.00133406
RAB6A	0.507041	0.342729	0.750128	0.000676891
RAB6B	0.538588	0.45518	0.637279	5.66778e-13
RAB9A	1.66051	1.19141	2.31433	0.00275436
RACGAP1	1.91295	1.59154	2.29927	4.79738e-12
RAD18	2.49859	1.88321	3.31506	2.18623e-10
RAD54L	1.76315	1.49169	2.08401	2.97026e-11
RAI14	2.54825	2.03449	3.19175	3.87606e-16
RALY	2.95554	2.10644	4.14693	3.58141e-10
RALYL	0.621994	0.508829	0.760328	3.58267e-06
RANGAP1	0.475126	0.362761	0.622297	6.46929e-08
RARS2	2.45604	1.80247	3.3466	1.25414e-08
RAVER2	0.6742	0.500858	0.907534	0.00932767
RB1CC1	0.488869	0.373918	0.639159	1.67041e-07
RBBP4	2.30326	1.72245	3.07993	1.82758e-08
RBBP6	0.372649	0.276031	0.503085	1.14527e-10
RBFOX1	0.731855	0.614237	0.871996	0.000478982
RBFOX2	0.568947	0.455134	0.711221	7.33036e-07
RBFOX3	0.612354	0.492535	0.76132	1.01189e-05
RBM10	0.642836	0.466887	0.885091	0.00676771
RBM24	1.65128	1.32598	2.05639	7.44819e-06
RBM3	1.74543	1.32559	2.29825	7.25578e-05
RBM4	0.299928	0.193301	0.465372	7.75498e-08
RBM47	2.37912	1.91314	2.95859	6.54457e-15
RBM4B	0.359669	0.244816	0.528405	1.88768e-07
RBM7	3.30946	2.1958	4.98793	1.079e-08
RBMS1	2.57197	2.06219	3.20776	5.21816e-17
RBPMS	2.16048	1.73723	2.68686	4.37549e-12
RCC1	1.86026	1.50631	2.29739	8.19817e-09
RCC1L	3.55981	2.40559	5.26782	2.15486e-10
RCC2	1.64679	1.29944	2.08698	3.67365e-05
RDX	1.73733	1.3011	2.31981	0.000180978
RECQL	1.69584	1.33469	2.15472	1.54093e-05
RECQL4	1.30481	1.10178	1.54526	0.00204799
REXO1	0.641507	0.462446	0.889901	0.00784915
REXO2	3.61187	2.80981	4.64287	1.19955e-23
REXO4	0.39434	0.286532	0.542711	1.12421e-08
RFC2	2.92542	2.35676	3.63129	2.16955e-22
RFC3	1.89014	1.54387	2.31407	6.98992e-10
RFC4	1.76981	1.42061	2.20485	3.56538e-07
RIOK1	0.506557	0.340301	0.754039	0.000805527
RNASE6	1.59021	1.38114	1.83093	1.11878e-10
RNASEH2A	1.67485	1.42967	1.96207	1.70016e-10
RNPEP	3.23609	2.31704	4.51968	5.58608e-12
RPF1	2.5203	1.85341	3.42715	3.75393e-09
RPF2	1.94316	1.31441	2.87266	0.000866498
RPL15	0.56262	0.420785	0.752263	0.000104154
RPL17	1.38272	1.11708	1.71153	0.00290929
RPL21	1.40687	1.19351	1.65839	4.74312e-05
RPL22	0.506907	0.383572	0.669901	1.78505e-06
RPL23	0.612689	0.470503	0.797842	0.000276562
RPL23A	1.39049	1.09517	1.76543	0.00680358
RPL26	0.669941	0.510336	0.879463	0.00391311
RPL26L1	2.2732	1.80988	2.85513	1.64837e-12
RPL28	1.35492	1.0979	1.6721	0.00465036
RPL3	0.319361	0.245382	0.415642	2.06441e-17
RPL30	0.623887	0.486861	0.799479	0.00019247
RPL37	0.434947	0.325906	0.58047	1.57061e-08
RPL39	1.41337	1.22411	1.63188	2.39522e-06
RPL4	0.398588	0.313687	0.506467	5.21324e-14
RPL41	1.54384	1.2753	1.86893	8.41992e-06
RPL6	0.564817	0.429037	0.743566	4.66019e-05
RPL9	1.34326	1.14803	1.57167	0.000230602
RPN1	4.76305	3.46792	6.54185	5.38622e-22
RPN2	4.92628	3.59157	6.757	4.58103e-23
RPP40	2.70356	1.99482	3.66411	1.4375e-10
RPS10	1.2643	1.06459	1.50149	0.00750863
RPS12	0.665619	0.531821	0.833078	0.000377979
RPS15	1.4778	1.23268	1.77166	2.43622e-05
RPS17	0.643259	0.500533	0.826684	0.00056696
RPS2	1.53586	1.26379	1.8665	1.6077e-05
RPS20	0.701117	0.5367	0.915903	0.009208
RPS23	0.609413	0.467326	0.794699	0.000255649
RPS24	0.423976	0.337403	0.532762	1.79195e-13
RPS25	0.575441	0.446806	0.74111	1.86165e-05
RPS27L	1.87007	1.4272	2.45036	5.63399e-06
RPS3A	1.38568	1.21572	1.57939	1.02928e-06
RPS5	1.31461	1.1294	1.5302	0.000414809
RPS6	0.703022	0.566235	0.872853	0.00141414
RPS6KA4	1.64324	1.13363	2.38195	0.00873829
RPS7	1.50038	1.26191	1.78393	4.35029e-06
RPSA	1.2863	1.08445	1.52571	0.00384092
RPTOR	0.505715	0.376231	0.679763	6.24484e-06
RRM1	1.9666	1.49866	2.58064	1.07136e-06
RRM2	1.77005	1.56718	1.99917	3.79026e-20
RRP12	0.322434	0.226266	0.459476	3.76791e-10
RRP36	3.28507	2.23546	4.8275	1.39629e-09
RRP8	2.1496	1.37757	3.35431	0.0007492
RRP9	1.46118	1.11147	1.92092	0.00658541
RUVBL1	2.56042	1.80743	3.62712	1.21608e-07
SALL2	0.513162	0.42521	0.619304	3.52104e-12
SBF1	0.511534	0.433165	0.604081	2.77355e-15
SBNO1	0.422534	0.286897	0.622295	1.29253e-05
SEC31A	2.47818	1.78622	3.4382	5.5574e-08
SEC61A1	3.00107	2.24594	4.0101	1.07536e-13
SEC61B	2.46907	1.8491	3.2969	8.96832e-10
SECISBP2L	0.499591	0.39871	0.625996	1.63727e-09
SERBP1	2.36261	1.7157	3.25343	1.38749e-07
SERPINB6	2.47471	1.93978	3.15716	3.0534e-13
SERPINH1	1.81239	1.61526	2.03357	4.42833e-24
SETDB1	0.590999	0.404307	0.863898	0.00662224
SF3A2	0.711776	0.551857	0.918037	0.00882855
SF3A3	3.06447	2.17076	4.32614	1.94315e-10
SF3B2	0.347569	0.259545	0.465446	1.31601e-12
SF3B4	1.78054	1.17364	2.70127	0.00667095
SF3B6	1.86006	1.31319	2.63468	0.000476171
SGF29	0.368309	0.277539	0.488765	4.56293e-12
SH3PXD2B	1.76123	1.41692	2.18922	3.39933e-07
SLAIN2	4.1293	2.67018	6.38577	1.82489e-10
SLC16A1	1.8858	1.48609	2.39302	1.79355e-07
SLC25A5	1.44214	1.15416	1.80197	0.00127528
SLK	0.357952	0.276452	0.463478	6.50733e-15
SMARCA2	0.606736	0.493062	0.746617	2.35204e-06
SMC2	1.44909	1.14243	1.83808	0.0022318
SMC3	0.497779	0.413908	0.598645	1.26126e-13
SMC4	2.12131	1.78701	2.51815	8.32324e-18
SMCHD1	0.65487	0.480772	0.892014	0.00725969
SMN1	4.90367	3.23336	7.43685	7.27552e-14
SNRNP200	0.699741	0.537214	0.911439	0.00810675
SNRNP40	2.52339	1.98013	3.2157	7.27115e-14
SNRPB	1.62638	1.38333	1.91214	3.88412e-09
SNRPB2	2.27423	1.68118	3.07647	9.82878e-08
SNRPC	2.24551	1.7807	2.83164	8.13207e-12
SNRPD1	1.50629	1.11999	2.02583	0.00673962
SNRPD2	1.83409	1.56484	2.14968	7.00286e-14
SNRPF	1.63906	1.22875	2.18637	0.000775791
SNRPG	1.85627	1.5756	2.18694	1.40897e-13
SNRPN	0.618603	0.528546	0.724006	2.18937e-09
SNU13	0.422452	0.310016	0.575665	4.82591e-08
SPCS2	4.2271	2.8166	6.34395	3.42318e-12
SPOUT1	0.457445	0.334027	0.626464	1.08779e-06
SPTAN1	0.468428	0.394434	0.556303	5.3689e-18
SPTBN1	0.576135	0.472623	0.702318	4.83918e-08
SPTBN2	0.582099	0.515437	0.657382	2.78312e-18
SRA1	2.41436	1.89059	3.08325	1.61328e-12
SRFBP1	3.7452	2.21809	6.32367	7.78306e-07
SRP9	2.2607	1.70836	2.99162	1.15161e-08
SRPRB	2.69087	2.06747	3.50225	1.81628e-13
SRRT	1.64475	1.22657	2.20549	0.000886183
SRSF10	2.43781	1.74577	3.40417	1.68932e-07
SRSF3	1.78686	1.30221	2.45187	0.000323459
SRSF9	3.23633	2.24023	4.67533	3.91361e-10
SSBP1	3.41699	2.56004	4.56078	7.37015e-17
STAG2	0.630347	0.458751	0.866129	0.0044211
STAT3	3.02927	2.166	4.23659	9.42512e-11
STT3A	3.2084	2.32949	4.41891	9.50274e-13
STXBP1	0.60657	0.519328	0.708468	2.78902e-10
SUMO2	2.23388	1.56229	3.19417	1.0562e-05
SUPT4H1	1.87803	1.3556	2.60179	0.000151091
SYNE1	0.409962	0.321317	0.523061	7.31648e-13
SYNE2	0.589405	0.454427	0.764476	6.77948e-05
SYNJ1	0.548503	0.432144	0.696193	7.94505e-07
TAOK3	0.375483	0.280925	0.501869	3.65663e-11
TARBP2	2.19371	1.71056	2.81332	6.04295e-10
TBCA	2.19814	1.69637	2.84832	2.56259e-09
TBL2	3.81952	2.89718	5.03548	2.03215e-21
TCF20	0.493088	0.386115	0.629697	1.45484e-08
TEFM	3.40215	2.45433	4.71599	1.99895e-13
TENT4B	0.222088	0.132235	0.372996	1.28635e-08
TENT5A	2.13517	1.83828	2.48002	3.07582e-23
TEP1	1.72822	1.22682	2.43454	0.00175279
TFB2M	2.68209	1.98872	3.61721	1.01367e-10
THADA	4.17225	2.41632	7.2042	2.96384e-07
THUMPD3	3.94519	2.31604	6.7203	4.40805e-07
TIMELESS	1.80703	1.52236	2.14492	1.33258e-11
TIPARP	1.42102	1.19708	1.68686	5.92409e-05
TLN2	0.715053	0.56807	0.900068	0.00428047
TMED10	2.69907	1.97318	3.69201	5.22335e-10
TMEM131L	1.57371	1.17639	2.10521	0.0022568
TMEM214	4.29402	3.15636	5.84173	1.71079e-20
TMPO	1.88343	1.51697	2.33842	9.77639e-09
TNPO1	2.74869	1.87355	4.03261	2.33558e-07
TOB2	0.515314	0.414962	0.639935	1.98026e-09
TONSL	1.38346	1.12729	1.69784	0.00189167
TOP2A	1.4436	1.30367	1.59854	1.68973e-12
TP53RK	3.54459	2.45024	5.12771	1.85419e-11
TPR	0.576064	0.450649	0.736381	1.06917e-05
TPT1	1.41938	1.13447	1.77583	0.00218684
TPX2	1.56289	1.38782	1.76004	1.7456e-13
TRA2B	3.4908	2.26022	5.39139	1.73102e-08
TRIM28	1.45904	1.12041	1.90001	0.00505012
TRIM56	1.61664	1.29894	2.01204	1.68578e-05
TRIP6	1.95425	1.68033	2.27282	3.44648e-18
TRIR	1.4476	1.13627	1.84423	0.00275395
TRMT112	1.89919	1.45023	2.48715	3.14304e-06
TRMT13	1.67368	1.22647	2.28394	0.00116628
TRMT2B	3.62397	2.7464	4.78196	8.93016e-20
TRNAU1AP	2.88115	2.20069	3.772	1.38056e-14
TRPT1	1.60284	1.18068	2.17594	0.00248752
TRUB1	0.374776	0.275927	0.509039	3.33917e-10
TSEN15	2.11313	1.56235	2.85808	1.19818e-06
TSEN34	2.46423	1.80579	3.36277	1.30142e-08
TSPYL1	0.39367	0.300886	0.515068	1.06178e-11
TSR2	0.450023	0.309441	0.654474	2.9357e-05
TTF2	3.42104	2.53802	4.61127	6.79111e-16
TTK	1.81393	1.5411	2.13506	8.04417e-13
TUBA1C	1.85644	1.66891	2.06505	4.89925e-30
TUBB	1.84369	1.48587	2.28767	2.74201e-08
TUBB6	1.60524	1.42605	1.80693	4.61346e-15
TUT1	0.416847	0.299533	0.580107	2.1104e-07
TWF1	3.10455	2.33161	4.13372	8.81935e-15
TWISTNB	4.56115	3.21796	6.46498	1.50387e-17
TYW1	3.46676	2.53247	4.74573	8.52784e-15
UBA52	1.38466	1.08964	1.75954	0.00776223
UBE2O	0.447329	0.3438	0.582034	2.10134e-09
UBR5	0.526919	0.400909	0.692534	4.33483e-06
UCHL5	0.293069	0.181364	0.473577	5.37103e-07
ULK1	0.51965	0.371241	0.727389	0.000136203
UPF3A	0.473325	0.339972	0.658985	9.4196e-06
URB2	1.62858	1.14343	2.31959	0.00687763
UTP15	4.31735	2.62961	7.0883	7.3834e-09
UTP18	2.8938	2.01008	4.16604	1.09569e-08
UTP20	2.88755	1.89143	4.40827	8.99066e-07
UTP6	2.54851	1.63938	3.9618	3.23946e-05
VARS	0.574972	0.423992	0.779714	0.000369411
VASP	2.7302	2.12468	3.50829	4.14537e-15
VIM	1.59656	1.42547	1.78817	5.96652e-16
WARS2	4.32065	3.01808	6.18539	1.30329e-15
WASF2	1.79829	1.37577	2.35056	1.74997e-05
WDHD1	2.1973	1.72733	2.79514	1.44166e-10
WDR1	3.19954	2.33337	4.38725	5.18258e-13
WDR6	0.545504	0.439847	0.676542	3.43869e-08
WDR61	2.09048	1.60944	2.7153	3.26283e-08
XRN2	3.66093	2.6963	4.97069	9.06796e-17
YBX1	1.83952	1.47436	2.29514	6.7192e-08
YBX3	1.78409	1.50023	2.12166	5.84335e-11
YWHAH	1.27259	1.05949	1.52856	0.00993698
YWHAZ	2.85804	1.98508	4.11488	1.63191e-08
ZBTB12	0.581703	0.482691	0.701024	1.26072e-08
ZBTB26	0.573744	0.405867	0.81106	0.00165704
ZBTB44	0.285539	0.203431	0.400787	4.31119e-13
ZC3H12B	0.291439	0.218143	0.389363	7.31118e-17
ZC3H12C	0.482651	0.332003	0.701656	0.000135628
ZC3HAV1	2.01212	1.5036	2.69263	2.55207e-06
ZCCHC8	2.02526	1.25279	3.27404	0.00398196
ZCCHC9	4.18115	3.07227	5.69027	9.15648e-20
ZCRB1	0.679067	0.508631	0.906615	0.00866872
ZEB1	0.47112	0.392796	0.565062	4.93254e-16
ZFP36L2	2.09982	1.70625	2.58417	2.46262e-12
ZFR2	0.63918	0.502199	0.813523	0.000275754
ZIC1	1.56533	1.33195	1.8396	5.33889e-08
ZMPSTE24	2.62097	1.90031	3.61493	4.26465e-09
ZNF205	0.60127	0.443471	0.815217	0.00105525
ZNF207	4.70934	2.93104	7.56656	1.50655e-10
ZNF267	3.39814	2.1735	5.3128	8.10379e-08
ZNF28	2.25379	1.64566	3.08666	4.09249e-07
ZNF319	0.448708	0.323949	0.621516	1.42725e-06
ZNF320	1.76299	1.26293	2.46106	0.000863793
ZNF521	1.36086	1.1219	1.6507	0.00176278
ZNF700	2.80369	2.06332	3.80973	4.40211e-11
ZNF768	0.518761	0.393101	0.68459	3.52587e-06
ZNF800	2.45232	1.56634	3.83944	8.78494e-05
ZRANB1	0.392279	0.317511	0.484654	4.19261e-18
ZYX	2.16271	1.84689	2.53254	9.977e-22

## Sheet: Supplementary Table S5
Supplementary Table S5. Prognosis-related immune gen（n=244）.
Gene name	HR	HR.95L	HR.95H	pvalue
A2M	1.572	1.33298	1.85387	7.63638e-08
ACTG1	3.46414	2.53898	4.72642	4.58995e-15
ACVR1B	0.600555	0.439411	0.820794	0.00137962
ACVR2A	0.492785	0.321666	0.754936	0.00114729
ACVRL1	1.57116	1.265	1.95141	4.39424e-05
AEN	1.84363	1.52587	2.22755	2.32534e-10
AKT1	1.67249	1.1904	2.34982	0.00303092
AKT2	1.98618	1.51081	2.61113	8.81584e-07
AMH	0.75619	0.661163	0.864875	4.52905e-05
ANGPTL2	0.681015	0.601995	0.770407	1.02788e-09
AP3B1	1.928	1.23477	3.01041	0.00388242
APOBEC3C	2.17809	1.88778	2.51304	1.46898e-26
APOM	0.602696	0.431583	0.841651	0.00296137
AR	1.31549	1.08419	1.59614	0.00544829
ARAF	3.76699	2.61625	5.42388	9.97159e-13
ARRB1	0.556816	0.459376	0.674923	2.43533e-09
B2M	1.87639	1.60101	2.19913	7.73104e-15
BCL10	3.33696	2.33927	4.76015	2.94987e-11
BID	0.364452	0.284438	0.466974	1.45184e-15
BIRC5	1.48023	1.34446	1.62972	1.3502e-15
BMP1	2.60048	2.10963	3.20553	3.41304e-19
BMP2	0.51282	0.451523	0.582437	8.45493e-25
BMPR1A	0.300288	0.20485	0.440189	7.05102e-10
BRAF	0.482677	0.34072	0.683778	4.14775e-05
BTK	1.79836	1.46422	2.20876	2.19428e-08
C3AR1	1.3656	1.19992	1.55417	2.33909e-06
CALCRL	0.68219	0.610385	0.762443	1.58696e-11
CALR	3.25523	2.53869	4.17402	1.34439e-20
CANX	2.79246	1.97696	3.94435	5.61349e-09
CASP3	2.33091	1.95787	2.77502	1.8962e-21
CBLB	0.432579	0.301628	0.620383	5.23671e-06
CCRL2	2.55362	1.99135	3.27465	1.48555e-13
CD320	1.5628	1.26344	1.93308	3.86604e-05
CD4	1.51429	1.29219	1.77456	2.9332e-07
CD48	1.99196	1.70744	2.3239	1.89648e-18
CD72	2.02998	1.69803	2.42682	7.73749e-15
CD74	1.52914	1.3631	1.7154	4.42676e-13
CD86	1.56675	1.34139	1.82997	1.45594e-08
CDK4	1.25129	1.15138	1.35988	1.29134e-07
CHGA	0.74454	0.682041	0.812766	4.27249e-11
CHGB	0.687473	0.625613	0.755451	6.7395e-15
CKLF	2.49923	2.02873	3.07886	7.47001e-18
CMTM3	3.30253	2.54836	4.27989	1.67963e-19
CMTM4	0.538739	0.460544	0.63021	1.07296e-14
CMTM6	3.38583	2.6104	4.3916	3.91574e-20
CMTM7	2.03402	1.64378	2.5169	6.45362e-11
CRHR1	0.336002	0.243758	0.463155	2.73065e-11
CRLF3	4.12856	2.84582	5.98949	8.07255e-14
CSRP1	1.50718	1.29863	1.74923	6.71146e-08
CTSL	2.25887	1.91544	2.66386	3.51184e-22
CTSS	1.66243	1.46358	1.88829	5.29016e-15
CXCL16	1.95996	1.59785	2.40414	1.06968e-10
CXCR4	1.61427	1.43009	1.82216	9.34114e-15
CYBB	1.36424	1.20046	1.55035	1.93481e-06
DDX58	1.50989	1.25409	1.81788	1.35823e-05
ECPAS	0.634664	0.468331	0.860071	0.003367
EDNRB	0.819569	0.731586	0.918134	0.000594621
EED	4.24749	2.54181	7.09776	3.3714e-08
ENDOU	0.587042	0.416881	0.826659	0.00228863
ENG	1.80777	1.52093	2.1487	1.85635e-11
ERAP1	1.79556	1.40687	2.29165	2.5687e-06
FCER1G	1.70491	1.50623	1.9298	3.19315e-17
FCGRT	2.08315	1.6979	2.55582	2.00722e-12
FGF12	0.54881	0.476337	0.632311	1.01237e-16
FGF13	0.338692	0.245519	0.467224	4.22964e-11
FGF14	0.648654	0.507687	0.828762	0.000535565
FGF9	0.460832	0.34124	0.622335	4.32824e-07
FGR	1.75331	1.44788	2.12319	8.94448e-09
FLT3LG	2.27454	1.46988	3.51971	0.000225061
FYN	0.541069	0.427479	0.684844	3.24424e-07
GBP2	1.24183	1.11655	1.38117	6.55812e-05
GMFG	1.74774	1.49766	2.03958	1.37606e-12
GNAI1	0.60321	0.521245	0.698063	1.16998e-11
GPI	2.12103	1.69468	2.65466	5.13447e-11
GRN	2.63923	2.13666	3.26001	2.1684e-19
HCK	1.47706	1.26892	1.71933	4.81903e-07
HDAC1	2.54298	1.99786	3.23685	3.39646e-14
HDGFL3	0.261753	0.178795	0.383203	5.49422e-12
HLA-A	1.74646	1.51824	2.00898	5.99716e-15
HLA-B	1.61109	1.415	1.83435	5.92115e-13
HLA-C	1.60866	1.40666	1.83966	3.80805e-12
HLA-DMA	1.61426	1.41292	1.8443	1.85011e-12
HLA-DMB	1.61601	1.42963	1.82669	1.63499e-14
HLA-DOA	1.43618	1.28197	1.60893	4.21006e-10
HLA-DPA1	1.46292	1.31901	1.62253	6.0011e-13
HLA-DPB1	1.49149	1.3328	1.66906	3.27495e-12
HLA-DQA1	1.44825	1.30673	1.60509	1.6739e-12
HLA-DQA2	1.23311	1.13102	1.34442	2.01373e-06
HLA-DQB1	1.37809	1.24508	1.5253	5.90385e-10
HLA-DRA	1.4424	1.30995	1.58825	9.07443e-14
HLA-DRB1	1.42231	1.28492	1.5744	1.07178e-11
HLA-DRB5	1.2062	1.10274	1.31937	4.1782e-05
HLA-E	1.52964	1.27996	1.82803	2.94302e-06
HLA-F	1.53654	1.31221	1.79922	9.58615e-08
HMGB1	1.69284	1.16675	2.45613	0.00556921
HMOX1	1.54441	1.38711	1.71955	2.18166e-15
HNF4G	2.59941	1.97064	3.4288	1.36946e-11
HSP90AB1	0.500475	0.356977	0.701658	5.93992e-05
HTR1A	0.415358	0.292053	0.590723	1.01181e-06
IDO1	1.35253	1.1535	1.58592	0.000200626
IFIH1	1.64565	1.41453	1.91453	1.10861e-10
IFNAR2	3.1408	2.16947	4.54703	1.33942e-09
IFNLR1	1.60069	1.2538	2.04355	0.000160113
IKBKB	3.1399	1.95953	5.03128	1.97074e-06
IKBKE	2.41894	1.87581	3.11932	9.86749e-12
IL10RA	1.51011	1.29792	1.75699	9.54303e-08
IL10RB	3.13093	2.44483	4.00957	1.51622e-19
IL13RA1	1.73498	1.45717	2.06575	6.0654e-10
IL15RA	1.60197	1.23148	2.08394	0.000445571
IL16	2.13973	1.58357	2.89121	7.29838e-07
IL17RD	0.530022	0.423885	0.662734	2.573e-08
IL18	1.6238	1.39028	1.89655	9.38709e-10
IL1R2	1.91608	1.6258	2.25818	8.60343e-15
IL2RG	2.20281	1.82329	2.66133	2.70722e-16
IRF7	1.57121	1.36631	1.80684	2.33111e-10
ITGB2	1.55273	1.35883	1.77431	1.01177e-10
JAG1	1.61363	1.39041	1.87269	2.99919e-10
LANCL1	0.571699	0.434488	0.75224	6.51948e-05
LIMS1	2.93368	2.26748	3.79562	2.63168e-16
LRSAM1	0.287818	0.216613	0.38243	8.81374e-18
LTB4R	1.60492	1.26543	2.03548	9.56292e-05
LTBP1	1.51035	1.31893	1.72955	2.4684e-09
LYN	1.90074	1.59197	2.26939	1.23939e-12
LYZ	1.53028	1.40444	1.66739	2.53929e-22
MALT1	2.84274	2.00534	4.02983	4.40859e-09
MANF	2.41081	1.94333	2.99073	1.23355e-15
MAP3K14	1.97495	1.49624	2.60681	1.54644e-06
MAPK1	0.519374	0.390605	0.690593	6.58956e-06
MAPK3	0.499626	0.334507	0.746252	0.000699369
MAPK8	0.25265	0.189652	0.336575	5.38891e-21
MAPT	0.535459	0.476767	0.601376	5.3489e-26
MDK	1.66088	1.49284	1.84783	1.13753e-20
MICB	2.0886	1.70917	2.55225	6.01594e-13
MR1	2.64317	2.10504	3.31886	5.83334e-17
MSR1	1.75633	1.56921	1.96575	1.1315e-22
MYDGF	2.4392	1.98389	2.99901	2.70584e-17
NAMPT	1.64518	1.49513	1.8103	1.92718e-24
NCK1	3.00723	2.02018	4.47653	5.81774e-08
NFATC3	1.99875	1.28599	3.10658	0.0020851
NFKB1	2.41305	1.72863	3.36846	2.26734e-07
NLRX1	0.589942	0.421504	0.82569	0.00209388
NOD1	2.0576	1.63512	2.58923	7.58423e-10
NOD2	1.8883	1.42359	2.50471	1.03203e-05
NOX4	2.89399	2.26306	3.70082	2.47157e-17
NR1D2	0.391271	0.310536	0.492997	1.74626e-15
NR3C2	0.612222	0.495456	0.756506	5.50815e-06
NRAS	2.59931	1.96374	3.44058	2.43605e-11
NRG3	0.473401	0.400522	0.559542	1.82913e-18
NRP1	1.97582	1.66317	2.34723	9.30329e-15
OAS1	1.47505	1.33573	1.62891	1.6116e-14
PAK1	1.24755	1.07721	1.44483	0.00314886
PAK3	0.566715	0.475394	0.675578	2.38005e-10
PAK5	0.445199	0.360776	0.549376	4.58372e-14
PCSK1	1.246	1.11066	1.39782	0.00017746
PCSK2	0.736074	0.648272	0.835768	2.26494e-06
PDGFRB	1.62644	1.33895	1.97565	9.52844e-07
PDIA2	0.637699	0.539316	0.75403	1.42333e-07
PDIA3	3.16237	2.46262	4.06095	1.83437e-19
PIK3CB	0.381964	0.26915	0.542064	7.10036e-08
PIK3R5	1.62642	1.31861	2.00608	5.525e-06
PLAU	1.61339	1.4648	1.77706	2.91845e-22
PLSCR1	1.93205	1.68558	2.21457	3.13049e-21
PLTP	1.67221	1.43641	1.94672	3.3638e-11
PLXNA3	1.46493	1.13555	1.88986	0.00330174
PLXNB2	1.50141	1.15098	1.95854	0.00272774
PML	2.20028	1.62321	2.9825	3.74987e-07
PPP3CA	0.516195	0.395385	0.67392	1.16801e-06
PPP3CB	0.304442	0.228245	0.406077	5.8789e-16
PPP4C	2.39251	1.91335	2.99168	2.00473e-14
PRKCB	0.651539	0.560758	0.757016	2.1919e-08
PRKCG	0.769276	0.660404	0.896096	0.000754289
PRKCQ	0.458034	0.345255	0.607652	6.1579e-08
PROCR	1.75188	1.49883	2.04764	1.86305e-12
PSMB8	1.79984	1.5499	2.09009	1.31507e-14
PSME1	1.69795	1.34527	2.14309	8.32285e-06
PSME2	1.88547	1.52764	2.32712	3.50224e-09
PSME3	3.93949	2.35698	6.58452	1.68232e-07
PTGDR2	0.576372	0.410317	0.809629	0.00148316
PTGDS	0.830363	0.76486	0.901475	9.24924e-06
PTK2	0.496009	0.351691	0.699549	6.42167e-05
PTN	1.64488	1.42429	1.89964	1.25343e-11
PTPN6	1.60679	1.34573	1.91849	1.585e-07
RAC1	5.00214	3.25166	7.69496	2.37267e-13
RARG	1.46849	1.13505	1.89987	0.00345598
RFXANK	1.5245	1.19113	1.95118	0.000810714
RHOA	4.87275	3.18752	7.44895	2.60448e-13
S100A10	1.46563	1.3222	1.62462	3.45531e-13
S100A11	1.75175	1.56628	1.95917	9.35719e-23
S100A16	1.81611	1.57134	2.09902	6.56731e-16
S100A2	1.59436	1.33458	1.90469	2.73781e-07
S100A6	1.60573	1.42661	1.80734	4.23836e-15
SEM1	2.49513	1.89045	3.29323	1.06553e-10
SEMA4A	0.599549	0.469474	0.765665	4.13501e-05
SEMA4D	0.689073	0.554995	0.855541	0.000743125
SEMA6B	0.573638	0.501794	0.655769	3.94021e-16
SFTPD	0.4602	0.341151	0.620791	3.74127e-07
SH3BP2	1.455	1.12431	1.88297	0.00436366
SHC1	1.9518	1.69622	2.2459	9.7391e-21
SLC11A1	1.57734	1.41633	1.75666	1.07713e-16
SLC22A17	0.470153	0.390556	0.565974	1.53011e-15
SLC40A1	1.44256	1.22834	1.69414	7.91765e-06
SLPI	1.28905	1.19224	1.39372	1.83814e-10
SOCS1	2.05662	1.79504	2.35631	2.78522e-25
SOS1	0.503449	0.365582	0.693308	2.62881e-05
SST	0.868553	0.784633	0.961447	0.00656149
SSTR1	0.486071	0.399233	0.591799	6.76326e-13
SSTR2	0.456996	0.381161	0.547919	2.70908e-17
STAT3	3.02927	2.166	4.23659	9.42512e-11
SYK	1.41954	1.20059	1.67841	4.15007e-05
TANK	4.28091	2.98664	6.13606	2.44112e-15
TAP1	1.56752	1.36325	1.80239	2.7937e-10
TAPBP	2.05377	1.55375	2.7147	4.28972e-07
TAPBPL	2.47	1.91706	3.18242	2.68907e-12
TCF7L2	0.298328	0.220739	0.40319	3.53271e-15
TGFB1	1.73811	1.45108	2.08193	1.93907e-09
TGFBR1	2.18554	1.72448	2.76987	9.95594e-11
TGFBR2	1.56766	1.29293	1.90076	4.79735e-06
THRB	0.686274	0.538835	0.874056	0.00228245
TLR2	1.52385	1.33043	1.74538	1.18279e-09
TLR3	2.0848	1.64118	2.64832	1.76151e-09
TLR8	1.88578	1.56324	2.27487	3.40392e-11
TNC	1.51809	1.36674	1.68621	6.6764e-15
TNFRSF10B	1.90588	1.573	2.3092	4.54675e-11
TNFRSF10C	2.52449	2.02983	3.13971	8.62926e-17
TNFRSF12A	1.65339	1.50079	1.82151	2.51217e-24
TNFRSF18	2.45019	1.94535	3.08604	2.68115e-14
TNFRSF19	1.78583	1.5403	2.0705	1.53984e-14
TNFRSF1A	2.13634	1.81396	2.51603	9.46031e-20
TNFRSF1B	1.38415	1.18405	1.61806	4.49377e-05
TNFSF13B	1.32586	1.18385	1.4849	1.0614e-06
TNFSF8	2.41333	1.90568	3.05621	2.64226e-13
TPM2	1.29892	1.14457	1.47409	5.07906e-05
TPT1	1.41938	1.13447	1.77583	0.00218684
TRIM22	1.63749	1.42866	1.87686	1.3924e-12
TRIM5	2.48145	2.01674	3.05322	8.65975e-18
TYROBP	1.53703	1.35983	1.73733	6.07529e-12
UBXN1	0.301349	0.226256	0.401364	2.34666e-16
UNC93B1	2.09625	1.77345	2.47781	4.13228e-18
VEGFB	1.682	1.28469	2.20219	0.000155531
VIM	1.59656	1.42547	1.78817	5.96652e-16
VIP	0.705977	0.554003	0.899642	0.00487707
VIPR1	0.488838	0.323101	0.739589	0.000704374
ZC3HAV1	2.01212	1.5036	2.69263	2.55207e-06
ZYX	2.16271	1.84689	2.53254	9.97699e-22

## Sheet: Supplementary Table S6
Supplementary Table S6. Markers of stromal activation factors（n=141）.
Gene name
DCN
PAPPA
SFRP4
THBS2
LY86
CXCL14
FOXF1
COL10A1
ACTG2
APBB1IP
SH2D1A
SULF1
MSR1
C3AR1
FAP
PTGIS
ITGBL1
BGN
CXCL12
ECM2
FCGR2A
MS4A4A
WISP1
COL1A2
MS4A6A
EDNRA
VCAM1
GPR124
SCUBE2
AIF1
HEPH
LUM
PTGER3
RUNX1T1
CDH5
PIK3R5
RAMP3
LDB2
COX7A1
EDIL3
DDR2
FCGR2B
LPPR4
COL15A1
AOC3
ITIH3
FMO1
PRKG1
PLXDC1
VSIG4
COL6A3
SGCD
COL3A1
F13A1
OLFML1
IGSF6
COMP
HGF
GIMAP5
ABCA6
ITGAM
MAF
ITM2A
CLEC7A
ASPN
LRRC15
ERG
CD86
TRAT1
COL8A2
TCF21
CD93
CD163
GREM1
LMOD1
TLR2
ZEB2
C1QB
KCNJ8
KDR
CD33
RASGRP3
TNFSF4
CCR1
CSF1R
BTK
MFAP5
MXRA5
ISLR
ARHGAP28
ZFPM2
TLR7
ADAM12
OLFML2B
ENPP2
CILP
SIGLEC1
SPON2
PLXNC1
ADAMTS5
SAMSN1
CH25H
COL14A1
EMCN
RGS4
PCDH12
RARRES2
CD248
PDGFRB
C1QA
COL5A3
IGF1
SP140
TFEC
TNN
ATP8B4
ZNF423
FRZB
SERPING1
ENPEP
CD14
DIO2
FPR1
IL18R1
HDC
TXNDC3
PDE2A
RSAD2
ITIH5
FASLG
MMP3
NOX4
WNT2
LRRC32
CXCL9
ODZ4
FBLN2
EGFL6
IL1B
SPON1
CD200
